# Supplementary material for: Elucidating the role of catalytic amino acid residues in the peptide-mediated silica oligomerization reaction mechanism
Source: Royal Society of Chemistry journal article supplement (doi:10.1039/d1cp04542c), 2022-01-01
Supplement: d1cp04542c2.pdf [file d1cp04542c2.pdf]

# Supporting Information for “Elucidating the Role of Catalytic Amino Acid Residues in the Silica Oligomerization Reaction Mechanism”

Stephanie R. Hare and Jim Pfaendtner

Department of Chemical Engineering, University of Washington, Seattle, Washington 98105,  
United States

## Cartesian Coordinates of Optimized Structures 3

### *No Catalyst 3*

RC, Reactant Complexes 3  
TS1, Si-O bond association 15  
IM1, three equatorial OH groups 20  
TS2, water cleavage of IM1 28  
TS-iso, isomerization of IM1 to IM2 33  
IM2, co-linear OH groups on Si 37  
TS3, water cleavage from IM2 45  
TS4, water cleavage from IM2 50  
PC, product complexes 53

### *One H<sub>2</sub>O 59*

RC-w, Reactant Complexes 59  
TS1-w, Si-O bond association 63  
IM1-w, three equatorial OH groups 67  
TS2-cw, water cleavage of IM1, H<sub>2</sub>O acting as catalyst 70  
TS2-sw, water cleavage of IM1, H<sub>2</sub>O acting as spectator 72  
TS-iso-w, isomerization of IM1 to IM2 73  
IM2-w, co-linear OH groups on Si 77  
TS3-cw, water cleavage from IM2, H<sub>2</sub>O acting as catalyst 84  
TS3-sw, water cleavage from IM2, H<sub>2</sub>O acting as spectator 85  
TS4-cw, water cleavage from IM2, H<sub>2</sub>O acting as catalyst 86  
TS4-sw, water cleavage from IM2, H<sub>2</sub>O acting as spectator 88  
PC-w, product complexes 91

### *One C(NH<sub>2</sub>)<sub>3</sub><sup>+</sup> 96*

RC-g, Reactant Complexes 96  
TS1-g, Si-O bond association 104  
IM1-g, three equatorial OH groups 107  
TS2-cg, water cleavage of IM1, C(NH<sub>2</sub>)<sub>3</sub><sup>+</sup> acting as catalyst 115  
TS2-sg, water cleavage of IM1, C(NH<sub>2</sub>)<sub>3</sub><sup>+</sup> acting as spectator 117  
TS-iso-g, isomerization of IM1 to IM2 120  
IM2-g, co-linear OH groups on Si 124  
TS3-cg, water cleavage from IM2, C(NH<sub>2</sub>)<sub>3</sub><sup>+</sup> acting as catalyst 137  
TS3-sg, water cleavage from IM2, C(NH<sub>2</sub>)<sub>3</sub><sup>+</sup> acting as spectator 139  
TS4-sg, water cleavage from IM2, C(NH<sub>2</sub>)<sub>3</sub><sup>+</sup> acting as spectator 141  
PC-g, product complexes 147

*One CH<sub>3</sub>NH<sub>3</sub><sup>+</sup> 158*

- RC-ma, Reactant Complexes 158
- TS1-ma, Si-O bond association 163
- IM1-ma, three equatorial OH groups 167
- TS2-cma, water cleavage of IM1, CH<sub>3</sub>NH<sub>3</sub><sup>+</sup> acting as catalyst 171
- TS2-sma, water cleavage of IM1, CH<sub>3</sub>NH<sub>3</sub><sup>+</sup> acting as spectator 174
- TS-iso-ma, isomerization of IM1 to IM2 175
- IM2-ma, co-linear OH groups on Si 181
- TS3-cma, water cleavage from IM2, CH<sub>3</sub>NH<sub>3</sub><sup>+</sup> acting as catalyst 191
- TS3-sma, water cleavage from IM2, CH<sub>3</sub>NH<sub>3</sub><sup>+</sup> acting as spectator 193
- TS4-cma, water cleavage from IM2, CH<sub>3</sub>NH<sub>3</sub><sup>+</sup> acting as catalyst 194
- TS4-sma, water cleavage from IM2, CH<sub>3</sub>NH<sub>3</sub><sup>+</sup> acting as spectator 196
- PC-ma, product complexes 199

*Two CH<sub>3</sub>NH<sub>3</sub><sup>+</sup> 207*

- RC-2ma, Reactant Complexes 207
- TS1-2ma, Si-O bond association 208
- IM1-2ma, three equatorial OH groups 209
- TS2-2ma, water cleavage of IM1 213
- TS-iso-2ma, isomerization of IM1 to IM2 215
- IM2-2ma, co-linear OH groups on Si 217
- TS3-2ma, water cleavage from IM2 220
- TS4-2ma, water cleavage from IM2 222
- PC-2ma, product complexes 223

**References 229**

## Cartesian Coordinates of Optimized Structures

The Cartesian coordinates of optimized structures referenced in the manuscript are shown below, optimized at the CAM-B3LYP/6-311++G(2d,2p) level of theory. For each stationary point, the different conformations/configurations for that stationary point are ranked by their relative free energies, with the name of the structure being preceded by its rank (with 00 being the lowest free energy structure for that stationary point). For structures that came from Hu, et al.<sup>1</sup>, the original name of the structure is maintained with the addition of its free energy rank preceding this original name. A folder containing these structures as MOL2 files is included with this Supporting Information. 3D ball-and-stick images of the lowest energy conformation/configuration for each stationary point is also shown here (as well is in the manuscript). The electronic energy (E), enthalpy (H), free energy (G) and free energy using the quasi-RRHO approximation [G(quasi-RRHO)] as calculated by AaronTools<sup>2,3</sup> in Hartrees (a.u.) are also shown for each structure.

### No Catalyst

RC, Reactant Complexes

00\_c3.mol2

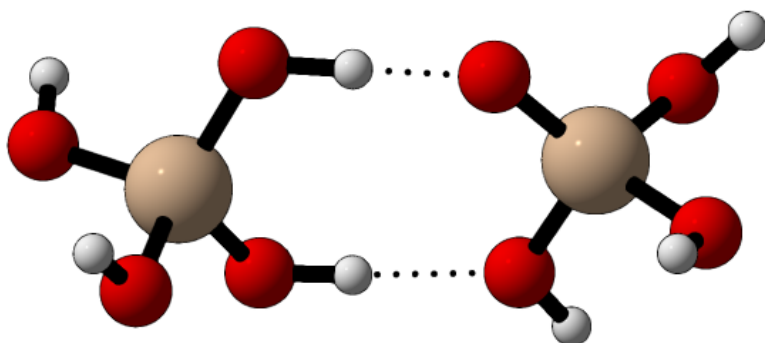

E = -1185.693373  
H = -1185.572070  
G = -1185.632124  
G(quasi-RRHO) = -1185.628829

|    |          |          |          |
|----|----------|----------|----------|
| Si | -2.15822 | 0.05962  | 0.07752  |
| O  | -1.30729 | -0.83467 | -1.05151 |
| H  | -1.82497 | -1.37248 | -1.65402 |
| O  | -3.12455 | -1.09028 | 0.77842  |
| O  | -1.15688 | 0.84081  | 0.99215  |
| H  | 0.29703  | 0.63604  | 1.15080  |
| H  | -3.82684 | -0.75945 | 1.34085  |
| O  | -3.24377 | 1.02588  | -0.72745 |

|    |          |          |          |
|----|----------|----------|----------|
| H  | -2.92492 | 1.91058  | -0.91454 |
| Si | 2.18231  | -0.00434 | 0.01308  |
| O  | 2.63222  | 1.21020  | -1.00434 |
| H  | 3.01298  | 1.98889  | -0.59433 |
| O  | 1.41336  | -1.10398 | -0.91264 |
| O  | 3.59403  | -0.65810 | 0.54658  |
| H  | 3.52256  | -1.29394 | 1.26083  |
| O  | 1.31342  | 0.50275  | 1.26990  |
| H  | 0.44262  | -1.02440 | -0.98710 |

*01\_c10.mol2*

E = -1185.691518  
H = -1185.569771  
G = -1185.631063  
G(quasi-RRHO) = -1185.627207

|    |          |          |          |
|----|----------|----------|----------|
| Si | -2.38593 | -0.01031 | 0.00431  |
| O  | -3.29884 | 1.17368  | -0.68047 |
| H  | -2.84820 | 1.99512  | -0.88548 |
| O  | -1.43460 | -0.79961 | -1.05378 |
| O  | -1.42455 | 0.60689  | 1.16677  |
| H  | -0.48067 | 0.33249  | 0.98890  |
| H  | -0.48790 | -0.74455 | -0.74262 |
| O  | -3.49667 | -1.08087 | 0.56345  |
| H  | -4.31621 | -0.71482 | 0.90034  |
| Si | 2.31256  | -0.01373 | 0.01471  |
| O  | 3.27783  | -0.02448 | 1.36350  |
| H  | 3.38838  | -0.87762 | 1.78672  |
| O  | 2.45646  | 1.54072  | -0.54269 |
| O  | 3.10261  | -1.03663 | -1.03277 |
| H  | 2.54999  | -1.41252 | -1.72013 |
| O  | 0.80194  | -0.38905 | 0.23408  |
| H  | 3.34830  | 1.83320  | -0.73866 |

*02\_c6.mol2*

E = -1185.691070  
H = -1185.571125  
G = -1185.631055  
G(quasi-RRHO) = -1185.627912

|    |          |          |          |
|----|----------|----------|----------|
| Si | -2.17963 | 0.01153  | -0.04778 |
| O  | -1.47242 | -0.53846 | 1.33748  |
| H  | -0.50271 | -0.52899 | 1.33509  |

|    |          |          |          |
|----|----------|----------|----------|
| O  | -3.08321 | 1.29535  | 0.49589  |
| O  | -1.16063 | 0.31926  | -1.21213 |
| H  | 0.15896  | 0.63458  | -1.04845 |
| H  | -3.65281 | 1.69962  | -0.16053 |
| O  | -3.34475 | -1.08967 | -0.49555 |
| H  | -3.03302 | -1.77286 | -1.09137 |
| Si | 2.18761  | 0.03538  | -0.04095 |
| O  | 2.79472  | -1.34104 | -0.70082 |
| H  | 3.46110  | -1.23980 | -1.38293 |
| O  | 1.35120  | -0.49044 | 1.28663  |
| O  | 3.50563  | 0.92324  | 0.37961  |
| H  | 3.35431  | 1.85783  | 0.53309  |
| O  | 1.19773  | 0.89782  | -0.94181 |
| H  | 1.79642  | -1.11566 | 1.86289  |

*03\_c2.mol2*

E = -1185.693763  
H = -1185.571400  
G = -1185.629719  
G(quasi-RRHO) = -1185.627167

|    |          |          |          |
|----|----------|----------|----------|
| Si | 2.01364  | -0.02379 | 0.00935  |
| O  | 1.60916  | 1.52575  | -0.34226 |
| H  | 0.64480  | 1.65041  | -0.40385 |
| O  | 1.44135  | -0.49776 | 1.46680  |
| O  | 1.43470  | -1.06596 | -1.11279 |
| H  | 0.51245  | -1.28845 | -0.83264 |
| H  | 0.51959  | -0.82063 | 1.30881  |
| O  | 3.64722  | -0.08185 | 0.04322  |
| H  | 4.11119  | 0.69347  | -0.27632 |
| Si | -1.94245 | -0.06522 | 0.02119  |
| O  | -3.04078 | -0.43162 | -1.16858 |
| H  | -2.70657 | -1.00088 | -1.86404 |
| O  | -1.19105 | 1.37464  | -0.38003 |
| O  | -2.89269 | 0.37137  | 1.30490  |
| H  | -3.53070 | -0.28289 | 1.59483  |
| O  | -0.85509 | -1.17206 | 0.26612  |
| H  | -1.76995 | 2.11502  | -0.57332 |

*04\_c1.mol2*

E = -1185.694219  
H = -1185.571737  
G = -1185.628690

G(quasi-RRHO) = -1185.626689

|    |          |          |          |
|----|----------|----------|----------|
| Si | 1.94136  | -0.07339 | 0.02554  |
| O  | 1.19472  | 1.35693  | -0.41591 |
| H  | 1.77669  | 2.08730  | -0.63623 |
| O  | 0.84953  | -1.16518 | 0.31539  |
| O  | 3.02780  | -0.48582 | -1.15995 |
| H  | 2.68473  | -1.07557 | -1.83368 |
| H  | -0.52389 | -1.31996 | -0.77541 |
| O  | 2.90475  | 0.39917  | 1.28649  |
| H  | 3.54561  | -0.24674 | 1.58858  |
| Si | -2.01323 | 0.00179  | 0.00331  |
| O  | -3.64757 | 0.04035  | 0.00035  |
| H  | -4.09945 | -0.77338 | 0.22986  |
| O  | -1.60950 | 1.53070  | -0.41852 |
| O  | -1.43016 | -0.40023 | 1.48000  |
| H  | -0.51250 | -0.74165 | 1.33187  |
| O  | -1.44221 | -1.09789 | -1.06838 |
| H  | -0.64382 | 1.64814  | -0.46468 |

*05\_c9.mol2*

E = -1185.692685

H = -1185.570324

G = -1185.627817

G(quasi-RRHO) = -1185.625715

|    |          |          |          |
|----|----------|----------|----------|
| Si | 1.91167  | -0.08452 | 0.00140  |
| O  | 2.58235  | -0.33082 | -1.49243 |
| H  | 3.19491  | 0.34382  | -1.79131 |
| O  | 1.27190  | 1.46576  | -0.06299 |
| O  | 0.86091  | -1.20895 | 0.31144  |
| H  | -0.49330 | -0.78297 | 1.33249  |
| H  | 1.53444  | 2.02930  | 0.66821  |
| O  | 3.11944  | 0.09937  | 1.12426  |
| H  | 3.32526  | -0.68409 | 1.63681  |
| Si | -1.98249 | -0.01665 | 0.00740  |
| O  | -1.44489 | -1.12286 | -1.07163 |
| H  | -0.53007 | -1.36401 | -0.78763 |
| O  | -1.53792 | 1.51177  | -0.38782 |
| O  | -3.61675 | -0.04812 | -0.01607 |
| H  | -4.06457 | 0.79744  | 0.03953  |
| O  | -1.40975 | -0.43847 | 1.48162  |
| H  | -0.57741 | 1.65556  | -0.31241 |

06\_c5.mol2

E = -1185.694389  
H = -1185.572381  
G = -1185.627779  
G(quasi-RRHO) = -1185.626347

|    |          |          |          |
|----|----------|----------|----------|
| Si | -1.87729 | -0.09862 | -0.05515 |
| O  | -1.36283 | -0.14040 | 1.53517  |
| H  | -1.71914 | 0.54148  | 2.10955  |
| O  | -1.40979 | 1.44535  | -0.50511 |
| O  | -1.22125 | -1.27118 | -0.85444 |
| H  | 0.32304  | -1.26731 | -0.98599 |
| H  | -1.79049 | 1.76675  | -1.32569 |
| O  | -3.52911 | -0.02469 | -0.08960 |
| H  | -3.97165 | -0.86377 | -0.22977 |
| Si | 1.89810  | -0.01014 | -0.02254 |
| O  | 1.45568  | -0.29163 | 1.53412  |
| H  | 0.49423  | -0.29950 | 1.68430  |
| O  | 1.43640  | 1.49232  | -0.48806 |
| O  | 3.53186  | 0.05470  | -0.08375 |
| H  | 4.00595  | -0.76299 | 0.07469  |
| O  | 1.33567  | -1.16561 | -1.00997 |
| H  | 0.47371  | 1.61709  | -0.54635 |

07\_c4.mol2

E = -1185.694473  
H = -1185.572455  
G = -1185.627730  
G(quasi-RRHO) = -1185.626344

|    |          |          |          |
|----|----------|----------|----------|
| Si | 1.87398  | 0.10920  | -0.00303 |
| O  | 1.35511  | -0.62131 | 1.40902  |
| H  | 1.73714  | -1.48108 | 1.60071  |
| O  | 1.44039  | -1.04554 | -1.13567 |
| O  | 1.19576  | 1.50866  | -0.16123 |
| H  | -0.34897 | 1.59380  | -0.29013 |
| H  | 1.80436  | -0.91771 | -2.01475 |
| O  | 3.52718  | 0.08958  | -0.04567 |
| H  | 3.95181  | 0.89856  | 0.24562  |
| Si | -1.89670 | 0.03461  | -0.01215 |
| O  | -1.46003 | -0.45399 | 1.49375  |
| H  | -0.50179 | -0.57266 | 1.61535  |
| O  | -1.40112 | -1.07428 | -1.11811 |
| O  | -3.52956 | 0.11403  | -0.06922 |

|   |          |          |          |
|---|----------|----------|----------|
| H | -4.01288 | -0.69571 | 0.10224  |
| O | -1.36198 | 1.52367  | -0.35157 |
| H | -0.43765 | -1.16496 | -1.21692 |

*08\_c8.mol2*

E = -1185.692970  
H = -1185.571054  
G = -1185.627500  
G(quasi-RRHO) = -1185.625650

|    |          |          |          |
|----|----------|----------|----------|
| Si | 1.88003  | -0.06505 | -0.06728 |
| O  | 1.34780  | 1.51938  | -0.13590 |
| H  | 1.73229  | 2.04132  | -0.84364 |
| O  | 1.42177  | -0.37212 | 1.51320  |
| O  | 1.24690  | -1.03333 | -1.12300 |
| H  | -0.30036 | -1.10882 | -1.14746 |
| H  | 1.68122  | -1.23789 | 1.83736  |
| O  | 3.53328  | -0.00159 | -0.10166 |
| H  | 3.93503  | -0.57930 | -0.75296 |
| Si | -1.90108 | -0.01195 | -0.02434 |
| O  | -1.49151 | 1.53591  | -0.37822 |
| H  | -0.53642 | 1.70525  | -0.31368 |
| O  | -1.42642 | -0.37920 | 1.50507  |
| O  | -3.53644 | -0.00269 | -0.06278 |
| H  | -3.97518 | -0.85434 | -0.08815 |
| O  | -1.31763 | -1.07559 | -1.09769 |
| H  | -0.46394 | -0.41453 | 1.63903  |

*09\_c12.mol2*

E = -1185.692087  
H = -1185.569858  
G = -1185.627006  
G(quasi-RRHO) = -1185.624995

|    |          |          |          |
|----|----------|----------|----------|
| Si | -2.01897 | -0.03147 | 0.00771  |
| O  | -1.60158 | 1.23376  | -0.97003 |
| H  | -1.93691 | 2.10017  | -0.72751 |
| O  | -1.36814 | -1.35860 | -0.67240 |
| O  | -1.41979 | 0.14496  | 1.51404  |
| H  | -0.48667 | -0.19966 | 1.47887  |
| H  | -0.45031 | -1.43777 | -0.29401 |
| O  | -3.65158 | -0.05847 | 0.02978  |
| H  | -4.07270 | -0.64151 | 0.66454  |



|    |         |          |          |
|----|---------|----------|----------|
| Si | 1.97121 | -0.03755 | 0.03497  |
| O  | 3.11770 | 0.59607  | 1.05255  |
| H  | 2.84368 | 1.37802  | 1.53408  |
| O  | 1.35211 | 1.28136  | -0.75906 |
| O  | 2.94341 | -0.87595 | -1.01854 |
| H  | 2.56795 | -1.70419 | -1.32045 |
| O  | 0.85386 | -0.93943 | 0.69420  |
| H  | 0.39556 | 1.28168  | -0.89730 |

*10\_c7.mol2*

E = -1185.693658  
H = -1185.571617  
G = -1185.626864  
G(quasi-RRHO) = -1185.625464

|    |          |          |          |
|----|----------|----------|----------|
| Si | -1.87720 | -0.12851 | -0.03863 |
| O  | -1.36505 | 0.15757  | 1.52711  |
| H  | -1.67914 | 0.96552  | 1.93982  |
| O  | -1.42318 | 1.30746  | -0.78168 |
| O  | -1.20354 | -1.42022 | -0.60055 |
| H  | 0.33159  | -1.40938 | -0.76759 |
| H  | -1.75135 | 1.42796  | -1.67605 |
| O  | -3.52698 | -0.20814 | -0.08923 |
| H  | -4.00523 | 0.59251  | 0.13409  |
| Si | 1.89690  | -0.00692 | -0.01818 |
| O  | 1.45646  | -0.06680 | 1.56363  |
| H  | 0.49591  | -0.02919 | 1.71262  |
| O  | 1.42261  | 1.41152  | -0.68982 |
| O  | 3.53021  | 0.06023  | -0.08978 |
| H  | 4.00936  | -0.73076 | 0.16165  |
| O  | 1.34236  | -1.29505 | -0.82955 |
| H  | 0.46007  | 1.50711  | -0.79024 |

*11\_c11.mol2*

E = -1185.692431  
H = -1185.570079  
G = -1185.626404  
G(quasi-RRHO) = -1185.624613

|    |          |          |          |
|----|----------|----------|----------|
| Si | -2.00761 | -0.03377 | -0.00702 |
| O  | -1.57358 | 1.54117  | -0.25869 |
| H  | -1.85851 | 2.18050  | 0.39858  |
| O  | -1.37270 | -0.87784 | -1.24395 |

|    |          |          |          |
|----|----------|----------|----------|
| O  | -1.41094 | -0.60765 | 1.39860  |
| H  | -0.48144 | -0.89948 | 1.20080  |
| H  | -0.45058 | -1.12724 | -0.95935 |
| O  | -3.64043 | -0.05153 | 0.00677  |
| H  | -4.06796 | -0.86286 | 0.28812  |
| Si | 1.95174  | -0.03865 | 0.00816  |
| O  | 2.71793  | 0.36548  | 1.42435  |
| H  | 3.12432  | -0.36582 | 1.89228  |
| O  | 1.35700  | 1.40888  | -0.52950 |
| O  | 3.20991  | -0.42353 | -1.00736 |
| H  | 2.95726  | -0.91116 | -1.79307 |
| O  | 0.85737  | -1.17128 | 0.13364  |
| H  | 0.40251  | 1.53037  | -0.43422 |

*12\_c14.mol2*

E = -1185.691615  
H = -1185.569385  
G = -1185.626355  
G(quasi-RRHO) = -1185.624421

|    |          |          |          |
|----|----------|----------|----------|
| Si | 2.02168  | -0.04161 | 0.02356  |
| O  | 1.59436  | 1.20121  | -0.98633 |
| H  | 1.90057  | 2.07879  | -0.74443 |
| O  | 1.42646  | 0.16732  | 1.52444  |
| O  | 1.37385  | -1.37794 | -0.64077 |
| H  | 0.44970  | -1.44135 | -0.27384 |
| H  | 0.49176  | -0.17080 | 1.49149  |
| O  | 3.64642  | -0.12027 | 0.16716  |
| H  | 4.17112  | 0.07302  | -0.61166 |
| Si | -1.97305 | -0.03418 | 0.03058  |
| O  | -3.01531 | -0.90786 | -0.92206 |
| H  | -2.65363 | -1.73599 | -1.24077 |
| O  | -1.35229 | 1.20676  | -0.87949 |
| O  | -3.05924 | 0.69287  | 1.05250  |
| H  | -2.75387 | 1.50801  | 1.45318  |
| O  | -0.85118 | -0.92023 | 0.70328  |
| H  | -0.39101 | 1.21447  | -0.98184 |

*13\_c15.mol2*

E = -1185.691863  
H = -1185.569594  
G = -1185.626320  
G(quasi-RRHO) = -1185.624380

|    |          |          |          |
|----|----------|----------|----------|
| Si | -2.02066 | -0.03997 | 0.03322  |
| O  | -1.59336 | 1.41678  | -0.63242 |
| H  | -1.90216 | 1.58969  | -1.52534 |
| O  | -1.44193 | -1.29103 | -0.83427 |
| O  | -1.35697 | -0.04791 | 1.51777  |
| H  | -0.43346 | -0.40653 | 1.39857  |
| H  | -0.50460 | -1.41783 | -0.53139 |
| O  | -3.64587 | -0.19737 | 0.05618  |
| H  | -4.16633 | 0.58694  | 0.23830  |
| Si | 1.96320  | -0.02828 | 0.01428  |
| O  | 2.97779  | 0.55131  | 1.19211  |
| H  | 3.53557  | -0.10651 | 1.61045  |
| O  | 1.35095  | 1.36558  | -0.63373 |
| O  | 3.01532  | -0.67789 | -1.09918 |
| H  | 2.62436  | -1.32709 | -1.68622 |
| O  | 0.85204  | -1.04519 | 0.49112  |
| H  | 0.38729  | 1.44249  | -0.63018 |

*14\_c16.mol2*

E = -1185.691750

H = -1185.569444

G = -1185.626099

G(quasi-RRHO) = -1185.624316

|    |          |          |          |
|----|----------|----------|----------|
| Si | 2.01494  | 0.02519  | 0.03918  |
| O  | 1.57766  | -1.15934 | -1.03445 |
| H  | 1.86070  | -1.04343 | -1.94481 |
| O  | 1.42980  | 1.48111  | -0.39777 |
| O  | 1.36578  | -0.42103 | 1.46174  |
| H  | 0.44087  | -0.04643 | 1.46571  |
| H  | 0.49777  | 1.50890  | -0.05630 |
| O  | 3.64064  | 0.16815  | 0.09330  |
| H  | 4.16003  | -0.63247 | 0.00180  |
| Si | -1.96637 | 0.03619  | 0.03075  |
| O  | -3.19521 | -0.61928 | 0.93169  |
| H  | -2.97872 | -1.44199 | 1.37298  |
| O  | -1.35636 | -1.25224 | -0.81777 |
| O  | -2.83874 | 0.99223  | -1.01044 |
| H  | -2.42121 | 1.83089  | -1.21128 |
| O  | -0.85381 | 0.83812  | 0.81568  |
| H  | -0.39752 | -1.25658 | -0.94303 |

*15\_c13.mol2*

E = -1185.689998  
H = -1185.569487  
G = -1185.626096  
G(quasi-RRHO) = -1185.624225

|    |          |          |          |
|----|----------|----------|----------|
| Si | -1.91037 | -0.05667 | -0.04489 |
| O  | -1.58878 | 0.02205  | 1.58655  |
| H  | -0.64191 | 0.00133  | 1.77897  |
| O  | -1.50943 | 1.41181  | -0.70640 |
| O  | -1.21261 | -1.29094 | -0.74289 |
| H  | 0.17546  | -1.39079 | -0.66129 |
| H  | -0.55741 | 1.52978  | -0.82571 |
| O  | -3.56071 | -0.02514 | -0.15129 |
| H  | -3.98460 | -0.88394 | -0.12615 |
| Si | 1.90314  | -0.07097 | -0.01436 |
| O  | 1.36372  | 0.18714  | 1.52565  |
| H  | 1.61769  | 1.01261  | 1.94549  |
| O  | 1.44208  | 1.31177  | -0.80307 |
| O  | 3.52701  | -0.26007 | -0.09715 |
| H  | 4.07689  | 0.48890  | 0.14029  |
| O  | 1.24245  | -1.40713 | -0.57767 |
| H  | 1.78508  | 1.43314  | -1.69184 |

*16\_c18.mol2*

E = -1185.685939  
H = -1185.563673  
G = -1185.625147  
G(quasi-RRHO) = -1185.621337

|    |          |          |          |
|----|----------|----------|----------|
| Si | 2.21050  | 0.00400  | -0.00013 |
| O  | 1.69030  | 1.48353  | 0.48628  |
| H  | 0.71684  | 1.42138  | 0.48555  |
| O  | 1.70298  | -1.15444 | 1.04788  |
| O  | 1.73862  | -0.32548 | -1.53534 |
| H  | 0.76592  | -0.32194 | -1.51269 |
| H  | 0.72956  | -1.10797 | 1.02726  |
| O  | 3.84308  | -0.00303 | -0.06331 |
| H  | 4.31805  | 0.17203  | 0.75060  |
| Si | -2.11208 | 0.00712  | -0.00197 |
| O  | -2.79168 | -1.38752 | -0.60955 |
| H  | -2.25614 | -1.83486 | -1.26698 |
| O  | -2.68723 | 1.29994  | -0.86814 |
| O  | -2.86265 | 0.17895  | 1.46999  |

|   |          |          |          |
|---|----------|----------|----------|
| H | -2.74264 | -0.54935 | 2.08177  |
| O | -0.54197 | -0.00333 | -0.00146 |
| H | -3.64109 | 1.35614  | -0.94694 |

*17\_c17.mol2*

E = -1185.687369  
H = -1185.564619  
G = -1185.620780  
G(quasi-RRHO) = -1185.619175

|    |          |          |          |
|----|----------|----------|----------|
| Si | 1.92722  | 0.00697  | 0.00010  |
| O  | 1.41959  | -0.83063 | 1.30954  |
| H  | 0.45213  | -0.83547 | 1.44080  |
| O  | 1.41603  | -0.71131 | -1.37694 |
| O  | 1.46766  | 1.57211  | 0.06918  |
| H  | 0.50397  | 1.69779  | -0.01481 |
| H  | 0.45281  | -0.86334 | -1.42403 |
| O  | 3.55809  | 0.06330  | 0.00010  |
| H  | 4.02963  | -0.77090 | -0.02039 |
| Si | -2.08315 | 0.00157  | -0.00057 |
| O  | -1.33816 | -0.89476 | -1.20767 |
| H  | -1.77941 | -1.71838 | -1.42636 |
| O  | -1.33800 | -0.62235 | 1.36737  |
| O  | -1.29938 | 1.47651  | -0.15987 |
| H  | -1.74247 | 2.10193  | -0.73731 |
| O  | -3.63179 | 0.03021  | -0.00261 |
| H  | -1.76598 | -0.39570 | 2.19586  |

*18\_c19.mol2*

E = -1185.685346  
H = -1185.562417  
G = -1185.617662  
G(quasi-RRHO) = -1185.616271

|    |         |          |          |
|----|---------|----------|----------|
| Si | 1.93466 | 0.00118  | -0.03667 |
| O  | 1.43687 | -0.43513 | 1.48125  |
| H  | 1.72298 | 0.13419  | 2.20048  |
| O  | 1.35142 | -1.14556 | -1.02394 |
| O  | 1.43242 | 1.50517  | -0.39173 |
| H  | 0.45886 | 1.59809  | -0.43883 |
| H  | 0.37450 | -1.22965 | -1.06209 |
| O  | 3.55846 | 0.08190  | -0.15226 |
| H  | 4.06167 | -0.69658 | 0.09292  |

|    |          |          |          |
|----|----------|----------|----------|
| Si | -2.10436 | 0.00888  | 0.03599  |
| O  | -1.36250 | -1.12883 | -0.97372 |
| H  | -1.84274 | -1.95600 | -1.05137 |
| O  | -1.47558 | -0.24216 | 1.54474  |
| O  | -1.31106 | 1.41043  | -0.46417 |
| H  | -1.68962 | 1.81402  | -1.24868 |
| O  | -3.65390 | 0.02537  | -0.03030 |
| H  | -0.51897 | -0.37448 | 1.59816  |

*19\_c20.mol2*

E = -1185.680500  
H = -1185.557710  
G = -1185.613428  
G(quasi-RRHO) = -1185.611902

|    |          |          |          |
|----|----------|----------|----------|
| Si | -1.95911 | 0.02936  | -0.00226 |
| O  | -1.37103 | -0.12149 | 1.52460  |
| H  | -1.68854 | -0.86083 | 2.04937  |
| O  | -1.32929 | 1.37620  | -0.62913 |
| O  | -1.48156 | -1.34329 | -0.76868 |
| H  | -1.83179 | -1.50464 | -1.64852 |
| H  | -0.34508 | 1.43287  | -0.66229 |
| O  | -3.58374 | 0.08048  | -0.08045 |
| H  | -4.02525 | 0.89695  | 0.16228  |
| Si | 2.14176  | -0.03448 | -0.00505 |
| O  | 1.35213  | 1.32797  | -0.65267 |
| H  | 1.76105  | 2.15992  | -0.40308 |
| O  | 1.56387  | -0.15433 | 1.55234  |
| O  | 1.46454  | -1.25997 | -0.89730 |
| H  | 0.50652  | -1.37093 | -0.85486 |
| O  | 3.69292  | 0.02415  | -0.07207 |
| H  | 0.60325  | -0.11930 | 1.64628  |

*20\_c21.mol2*

E = -1185.672269  
H = -1185.549658  
G = -1185.607384  
G(quasi-RRHO) = -1185.605312

|    |         |          |          |
|----|---------|----------|----------|
| Si | 1.99832 | -0.00066 | -0.00258 |
| O  | 1.38908 | -0.92162 | 1.20215  |
| H  | 1.73952 | -0.80280 | 2.08847  |
| O  | 1.38475 | -0.61152 | -1.38880 |

|    |          |          |          |
|----|----------|----------|----------|
| O  | 1.38183  | 1.49896  | 0.16905  |
| H  | 1.71967  | 2.20282  | -0.39005 |
| H  | 1.64762  | -1.49175 | -1.66844 |
| O  | 3.61726  | 0.11907  | 0.02366  |
| H  | 4.15473  | -0.66263 | -0.12033 |
| Si | -2.18742 | 0.00141  | 0.00243  |
| O  | -1.54940 | -0.19845 | -1.53268 |
| H  | -0.60061 | -0.36523 | -1.57570 |
| O  | -1.53777 | -1.22384 | 0.93990  |
| O  | -1.54453 | 1.43041  | 0.59135  |
| H  | -0.59742 | 1.55378  | 0.45882  |
| O  | -3.74456 | -0.00190 | 0.00806  |
| H  | -0.58950 | -1.17332 | 1.10780  |

TS1, Si-O bond association

*00\_d3.mol2*

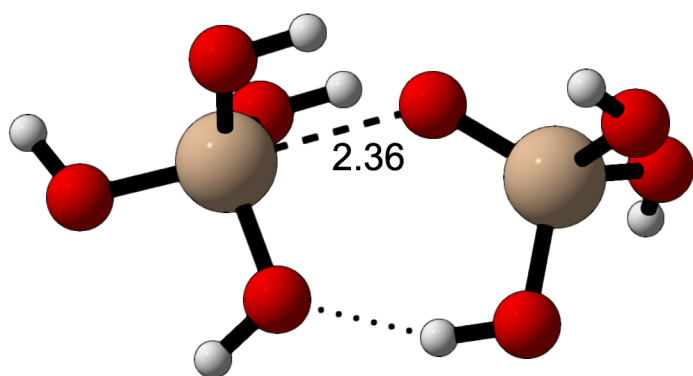

E = -1185.683143  
H = -1185.561176  
G = -1185.618076  
G(quasi-RRHO) = -1185.615415

|    |          |          |          |
|----|----------|----------|----------|
| Si | 1.77922  | 0.04652  | 0.03873  |
| O  | 1.11184  | -1.14090 | -0.91555 |
| H  | 1.77990  | -1.69952 | -1.32083 |
| O  | 1.67985  | 1.58251  | -0.54443 |
| O  | 1.64119  | -0.15710 | 1.66637  |
| H  | 0.72713  | 0.07825  | 1.88266  |
| H  | 0.76557  | 1.86216  | -0.39139 |
| O  | 3.38412  | -0.32897 | -0.22506 |
| H  | 4.02216  | 0.19901  | 0.25659  |
| Si | -1.86314 | 0.02271  | 0.01255  |

|   |          |          |          |
|---|----------|----------|----------|
| O | -1.64624 | -1.31039 | -0.94521 |
| H | -0.69397 | -1.44260 | -1.08541 |
| O | -2.84796 | 1.10484  | -0.77217 |
| O | -2.89592 | -0.43623 | 1.22780  |
| H | -2.67835 | -1.26927 | 1.64854  |
| O | -0.47276 | 0.62918  | 0.45640  |
| H | -2.38040 | 1.75920  | -1.29322 |

*01\_d1.mol2*

E = -1185.684567  
H = -1185.562362  
G = -1185.617581  
G(quasi-RRHO) = -1185.615876

|    |          |          |          |
|----|----------|----------|----------|
| Si | -1.72192 | -0.01564 | 0.01035  |
| O  | -1.17155 | 1.37017  | -0.69212 |
| H  | -0.21421 | 1.43934  | -0.79987 |
| O  | -1.80530 | -1.40576 | -0.89798 |
| O  | -1.61371 | -0.19188 | 1.66044  |
| H  | -0.72265 | -0.49468 | 1.86256  |
| H  | -0.92610 | -1.79789 | -0.90884 |
| O  | -3.34847 | 0.42759  | -0.07501 |
| H  | -3.94065 | -0.23014 | 0.29113  |
| Si | 1.81274  | -0.05140 | 0.00732  |
| O  | 2.57479  | 0.46647  | 1.37856  |
| H  | 3.03389  | -0.20396 | 1.88724  |
| O  | 1.66007  | 1.33518  | -0.89725 |
| O  | 2.90666  | -1.08306 | -0.68335 |
| H  | 2.53015  | -1.74254 | -1.26874 |
| O  | 0.37192  | -0.66953 | 0.15020  |
| H  | 2.37297  | 1.97490  | -0.85884 |

*02\_d4.mol2*

E = -1185.683214  
H = -1185.561245  
G = -1185.617214  
G(quasi-RRHO) = -1185.614982

|    |          |          |          |
|----|----------|----------|----------|
| Si | -1.77829 | -0.04631 | 0.03526  |
| O  | -1.67730 | 0.00467  | 1.67728  |
| H  | -0.76340 | -0.23459 | 1.88983  |
| O  | -1.10048 | 1.24392  | -0.76651 |
| O  | -1.65578 | -1.51909 | -0.69000 |



|    |          |          |          |
|----|----------|----------|----------|
| H  | -0.74465 | -1.81047 | -0.53883 |
| H  | -1.76347 | 1.79674  | -1.18779 |
| O  | -3.38103 | 0.33542  | -0.23545 |
| H  | -4.01712 | -0.33928 | 0.00536  |
| Si | 1.84705  | -0.03247 | 0.01470  |
| O  | 2.98178  | 0.16576  | 1.21324  |
| H  | 2.81736  | 0.89391  | 1.81478  |
| O  | 1.65531  | 1.46291  | -0.66981 |
| O  | 2.62379  | -1.04261 | -1.04784 |
| H  | 3.51131  | -0.77976 | -1.29768 |
| O  | 0.46472  | -0.65560 | 0.44977  |
| H  | 0.70917  | 1.61329  | -0.83064 |

*03\_d2.mol2*

E = -1185.683254  
H = -1185.561281  
G = -1185.617029  
G(quasi-RRHO) = -1185.614916

|    |          |          |          |
|----|----------|----------|----------|
| Si | -1.77648 | -0.06242 | 0.01334  |
| O  | -1.11319 | 1.39036  | -0.45301 |
| H  | -1.77858 | 2.07660  | -0.54796 |
| O  | -1.69414 | -1.26358 | -1.10862 |
| O  | -1.62039 | -0.48480 | 1.59695  |
| H  | -0.70664 | -0.78868 | 1.69816  |
| H  | -0.77802 | -1.57655 | -1.08979 |
| O  | -3.38321 | 0.38598  | -0.05798 |
| H  | -3.99924 | -0.20631 | 0.37506  |
| Si | 1.85404  | -0.00870 | 0.00514  |
| O  | 2.77264  | 0.12123  | 1.38078  |
| H  | 3.15542  | -0.69830 | 1.69798  |
| O  | 1.64531  | 1.56289  | -0.45620 |
| O  | 2.90059  | -0.74553 | -1.05828 |
| H  | 2.47627  | -1.16665 | -1.80770 |
| O  | 0.47388  | -0.76503 | 0.14842  |
| H  | 0.69301  | 1.74356  | -0.52106 |

*04\_d5.mol2*

E = -1185.682957  
H = -1185.560993  
G = -1185.616911  
G(quasi-RRHO) = -1185.614595

|    |          |          |          |
|----|----------|----------|----------|
| Si | -1.77652 | -0.06112 | 0.00281  |
| O  | -1.10357 | 1.44721  | -0.19813 |
| H  | -1.76999 | 2.13851  | -0.22447 |
| O  | -1.66952 | -1.06454 | -1.29763 |
| O  | -1.65992 | -0.73642 | 1.49978  |
| H  | -0.74734 | -1.05208 | 1.57303  |
| H  | -0.75456 | -1.38119 | -1.30933 |
| O  | -3.38049 | 0.40177  | -0.03677 |
| H  | -4.01517 | -0.27064 | 0.21382  |
| Si | 1.84235  | -0.01985 | 0.00482  |
| O  | 2.82805  | -0.14387 | 1.33903  |
| H  | 3.17401  | -1.02075 | 1.51343  |
| O  | 1.65417  | 1.61377  | -0.14254 |
| O  | 2.72454  | -0.58834 | -1.28563 |
| H  | 3.61624  | -0.24405 | -1.36145 |
| O  | 0.46551  | -0.78583 | 0.08234  |
| H  | 0.70508  | 1.81379  | -0.19547 |

*05\_d6.mol2*

E = -1185.677808

H = -1185.556165

G = -1185.612804

G(quasi-RRHO) = -1185.610634

|    |          |          |          |
|----|----------|----------|----------|
| Si | -1.79690 | 0.04370  | 0.01432  |
| O  | -1.16925 | -1.14909 | -0.92351 |
| H  | -0.20661 | -1.17113 | -1.02688 |
| O  | -1.67533 | -0.12775 | 1.65669  |
| O  | -1.73715 | 1.58987  | -0.55278 |
| H  | -0.80745 | 1.85135  | -0.46082 |
| H  | -2.49411 | -0.47410 | 2.01973  |
| O  | -3.43211 | -0.30046 | -0.15227 |
| H  | -3.67275 | -0.68987 | -0.99357 |
| Si | 1.87053  | 0.04995  | 0.03005  |
| O  | 1.65431  | -1.13982 | -1.11993 |
| H  | 2.30934  | -1.83849 | -1.16125 |
| O  | 2.57888  | -0.78006 | 1.27635  |
| O  | 3.06077  | 1.09921  | -0.45719 |
| H  | 2.73842  | 1.89180  | -0.88982 |
| O  | 0.47857  | 0.72892  | 0.26765  |
| H  | 3.03269  | -0.24735 | 1.93143  |

06\_d7.mol2

E = -1185.676798  
H = -1185.555110  
G = -1185.610020  
G(quasi-RRHO) = -1185.608516

|    |          |          |          |
|----|----------|----------|----------|
| Si | 1.70511  | 0.00351  | 0.06196  |
| O  | 1.08914  | -1.35490 | -0.66091 |
| H  | 1.72768  | -1.77616 | -1.24216 |
| O  | 1.09940  | 1.37706  | -0.63460 |
| O  | 1.82729  | -0.04093 | 1.68826  |
| H  | 0.89336  | -0.05614 | 1.98377  |
| H  | 1.77324  | 1.87905  | -1.10031 |
| O  | 3.28665  | 0.04542  | -0.45094 |
| H  | 3.94143  | -0.22032 | 0.19648  |
| Si | -1.80034 | -0.01103 | 0.06651  |
| O  | -1.77662 | -1.36346 | -0.89749 |
| H  | -0.85928 | -1.66112 | -0.97173 |
| O  | -1.76569 | 1.35151  | -0.89112 |
| O  | -3.35070 | -0.06759 | 0.65398  |
| H  | -3.66963 | 0.75059  | 1.03766  |
| O  | -0.61241 | -0.00562 | 1.09900  |
| H  | -0.84997 | 1.65757  | -0.95176 |

07\_d8.mol2

E = -1185.676798  
H = -1185.555110  
G = -1185.610017  
G(quasi-RRHO) = -1185.608514

|    |          |          |          |
|----|----------|----------|----------|
| Si | 1.70510  | -0.00353 | 0.06197  |
| O  | 1.09937  | -1.37711 | -0.63451 |
| H  | 1.77317  | -1.87902 | -1.10037 |
| O  | 1.08917  | 1.35487  | -0.66098 |
| O  | 1.82730  | 0.04103  | 1.68826  |
| H  | 0.89337  | 0.05633  | 1.98378  |
| H  | 1.72776  | 1.77621  | -1.24211 |
| O  | 3.28663  | -0.04549 | -0.45096 |
| H  | 3.94143  | 0.22056  | 0.19632  |
| Si | -1.80034 | 0.01105  | 0.06652  |
| O  | -1.76572 | -1.35146 | -0.89114 |
| H  | -0.85003 | -1.65762 | -0.95166 |
| O  | -1.77659 | 1.36349  | -0.89747 |
| O  | -3.35069 | 0.06762  | 0.65401  |

|   |          |          |          |
|---|----------|----------|----------|
| H | -3.66977 | -0.75069 | 1.03729  |
| O | -0.61239 | 0.00553  | 1.09899  |
| H | -0.85925 | 1.66110  | -0.97180 |

*08\_d9.mol2*

E = -1185.674420  
H = -1185.552962  
G = -1185.608827  
G(quasi-RRHO) = -1185.607013

|    |          |          |          |
|----|----------|----------|----------|
| Si | -1.82418 | 0.01052  | -0.05683 |
| O  | -1.08510 | -0.42122 | 1.36715  |
| H  | -1.72528 | -0.65483 | 2.04415  |
| O  | -1.73417 | 1.63183  | -0.32584 |
| O  | -1.62658 | -1.01094 | -1.31821 |
| H  | -0.67301 | -0.91633 | -1.52853 |
| H  | -2.60150 | 2.04318  | -0.30101 |
| O  | -3.44369 | -0.17652 | 0.30777  |
| H  | -3.86203 | -0.94569 | -0.08180 |
| Si | 1.90042  | 0.01631  | -0.04996 |
| O  | 1.68641  | -0.53780 | 1.49934  |
| H  | 0.73426  | -0.55869 | 1.68860  |
| O  | 2.66703  | 1.49021  | -0.00020 |
| O  | 3.07437  | -0.96289 | -0.71202 |
| H  | 2.90194  | -1.90355 | -0.64566 |
| O  | 0.53994  | 0.12088  | -0.82957 |
| H  | 3.53257  | 1.49192  | 0.41200  |

IM1, three equatorial OH groups

*00\_e1.mol2*

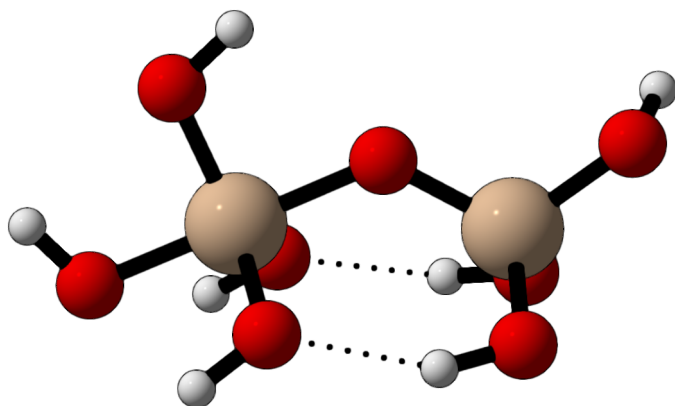

E = -1185.697202  
H = -1185.573186  
G = -1185.625378  
G(quasi-RRHO) = -1185.624548

|    |          |          |          |
|----|----------|----------|----------|
| Si | 1.35635  | -0.01919 | 0.12289  |
| O  | 0.97895  | -1.34095 | -0.88081 |
| H  | 1.73853  | -1.55583 | -1.42655 |
| O  | 0.98376  | 1.51924  | -0.50294 |
| O  | 2.01569  | -0.22494 | 1.66073  |
| H  | 1.31730  | -0.30903 | 2.31259  |
| H  | 1.74363  | 1.86362  | -0.97726 |
| O  | 2.97629  | 0.06730  | -0.55788 |
| H  | 3.64340  | -0.01300 | 0.12403  |
| Si | -1.66897 | 0.00744  | 0.03587  |
| O  | -1.78422 | -1.22324 | -1.05207 |
| H  | -0.88492 | -1.54432 | -1.23957 |
| O  | -1.78507 | 1.48348  | -0.67634 |
| O  | -2.99228 | -0.06921 | 1.00374  |
| H  | -3.27885 | -0.94897 | 1.25463  |
| O  | -0.27036 | -0.10716 | 0.81944  |
| H  | -0.88452 | 1.83571  | -0.78141 |

*01\_e7.mol2*

E = -1185.692041  
H = -1185.568438  
G = -1185.624078  
G(quasi-RRHO) = -1185.622013

|    |          |          |          |
|----|----------|----------|----------|
| Si | 1.47423  | 0.06911  | 0.05265  |
| O  | 0.96821  | -1.25860 | -0.88339 |
| H  | 1.73142  | -1.73877 | -1.21128 |
| O  | 1.78625  | 1.58946  | -0.61005 |
| O  | 1.61588  | -0.11855 | 1.72103  |
| H  | 0.78600  | 0.10591  | 2.14613  |
| H  | 0.99118  | 2.12518  | -0.58644 |
| O  | 3.12331  | -0.42355 | -0.22068 |
| H  | 3.74087  | 0.29510  | -0.08446 |
| Si | -1.73954 | 0.01568  | -0.01193 |
| O  | -1.69635 | -1.40485 | -0.83290 |
| H  | -0.76049 | -1.62033 | -1.01552 |
| O  | -2.66002 | 1.13342  | -0.79718 |
| O  | -2.64140 | -0.18478 | 1.35187  |
| H  | -2.46503 | -0.98170 | 1.85437  |

|   |          |         |          |
|---|----------|---------|----------|
| O | -0.25629 | 0.54600 | 0.25143  |
| H | -2.22620 | 1.59900 | -1.51397 |

*02\_e9.mol2*

E = -1185.692154  
H = -1185.568538  
G = -1185.623805  
G(quasi-RRHO) = -1185.621845

|    |          |          |          |
|----|----------|----------|----------|
| Si | -1.45966 | -0.08860 | 0.00102  |
| O  | -0.97754 | 1.48907  | -0.41905 |
| H  | -1.74205 | 2.06828  | -0.44611 |
| O  | -1.90492 | -1.24516 | -1.14377 |
| O  | -1.43207 | -0.53659 | 1.62561  |
| H  | -0.57954 | -0.91214 | 1.85319  |
| H  | -1.13668 | -1.75384 | -1.40977 |
| O  | -3.10175 | 0.48454  | 0.10814  |
| H  | -3.73695 | -0.22332 | -0.00031 |
| Si | 1.71953  | 0.00332  | -0.02990 |
| O  | 2.36675  | -0.16356 | 1.47618  |
| H  | 2.64022  | -1.04766 | 1.72700  |
| O  | 1.69888  | 1.61546  | -0.31652 |
| O  | 2.80055  | -0.75843 | -1.01374 |
| H  | 2.49655  | -0.95124 | -1.90252 |
| O  | 0.25683  | -0.61991 | -0.19230 |
| H  | 0.76648  | 1.89047  | -0.41359 |

*03\_e3.mol2*

E = -1185.692213  
H = -1185.568618  
G = -1185.623778  
G(quasi-RRHO) = -1185.621883

|    |          |          |          |
|----|----------|----------|----------|
| Si | 1.46138  | -0.08349 | 0.05068  |
| O  | 0.98465  | 1.54671  | -0.07004 |
| H  | 1.73440  | 2.08300  | -0.33700 |
| O  | 1.87702  | -0.69231 | 1.56386  |
| O  | 1.47508  | -1.12834 | -1.27668 |
| H  | 0.64178  | -1.59806 | -1.34213 |
| H  | 1.09294  | -1.02961 | 2.00149  |
| O  | 3.09838  | 0.40823  | -0.28930 |
| H  | 3.61086  | -0.30122 | -0.67696 |
| Si | -1.72056 | 0.01252  | 0.00752  |

|   |          |          |          |
|---|----------|----------|----------|
| O | -2.38001 | -0.66594 | -1.34118 |
| H | -2.66611 | -1.57767 | -1.26245 |
| O | -1.68768 | 1.62215  | -0.29137 |
| O | -2.79948 | -0.35009 | 1.20025  |
| H | -2.48824 | -0.22810 | 2.09900  |
| O | -0.26083 | -0.52362 | 0.37628  |
| H | -0.75428 | 1.91072  | -0.27131 |

*04\_e2.mol2*

E = -1185.692368  
H = -1185.568813  
G = -1185.623609  
G(quasi-RRHO) = -1185.621957

|    |          |          |          |
|----|----------|----------|----------|
| Si | -1.42542 | 0.01586  | -0.09958 |
| O  | -0.96893 | -0.81195 | 1.31817  |
| H  | -1.74710 | -0.96676 | 1.85765  |
| O  | -1.37950 | 1.69902  | -0.05464 |
| O  | -1.88460 | -0.82274 | -1.49218 |
| H  | -1.11650 | -0.99989 | -2.03812 |
| H  | -2.24960 | 2.01985  | 0.19212  |
| O  | -3.11100 | 0.00983  | 0.43844  |
| H  | -3.66661 | -0.46096 | -0.18287 |
| Si | 1.71945  | 0.00125  | -0.02271 |
| O  | 1.70213  | -0.63947 | 1.48893  |
| H  | 0.77218  | -0.81006 | 1.73596  |
| O  | 2.29122  | 1.54483  | -0.02033 |
| O  | 2.82874  | -0.82531 | -0.92066 |
| H  | 2.79197  | -1.78137 | -0.85693 |
| O  | 0.25730  | -0.01651 | -0.65779 |
| H  | 3.21629  | 1.65809  | 0.20484  |

*05\_e8.mol2*

E = -1185.692264  
H = -1185.568591  
G = -1185.623180  
G(quasi-RRHO) = -1185.621614

|    |          |          |          |
|----|----------|----------|----------|
| Si | -1.43044 | -0.01746 | 0.11983  |
| O  | -0.99362 | -1.02637 | -1.18538 |
| H  | -1.74645 | -1.11765 | -1.77336 |
| O  | -1.97308 | -0.73997 | 1.53797  |
| O  | -1.24054 | 1.65361  | -0.04618 |

|    |          |          |          |
|----|----------|----------|----------|
| H  | -0.34351 | 1.94131  | 0.14019  |
| H  | -1.21913 | -0.98412 | 2.07801  |
| O  | -3.07392 | 0.10476  | -0.45572 |
| H  | -3.23481 | 0.96997  | -0.83217 |
| Si | 1.67882  | -0.02008 | 0.02813  |
| O  | 2.94976  | -0.51924 | 0.94304  |
| H  | 3.08948  | -1.46668 | 0.99372  |
| O  | 1.91942  | 1.59661  | -0.19512 |
| O  | 1.71297  | -0.85001 | -1.38776 |
| H  | 0.79189  | -1.06945 | -1.62550 |
| O  | 0.26032  | -0.17188 | 0.74351  |
| H  | 2.69472  | 1.87207  | -0.68718 |

*06\_e4.mol2*

E = -1185.693426  
H = -1185.569367  
G = -1185.621141  
G(quasi-RRHO) = -1185.620326

|    |          |          |          |
|----|----------|----------|----------|
| Si | 1.37070  | -0.01844 | 0.14427  |
| O  | 0.98362  | -1.37742 | -0.81229 |
| H  | 1.74057  | -1.69548 | -1.30670 |
| O  | 0.99025  | 1.51505  | -0.49982 |
| O  | 1.99997  | -0.18725 | 1.69147  |
| H  | 1.27865  | -0.25443 | 2.31944  |
| H  | 1.74843  | 1.92731  | -0.91679 |
| O  | 3.02007  | 0.04190  | -0.45502 |
| H  | 3.08570  | 0.14404  | -1.40559 |
| Si | -1.66656 | 0.00966  | 0.02406  |
| O  | -1.77572 | -1.24329 | -1.03962 |
| H  | -0.87732 | -1.58025 | -1.19992 |
| O  | -1.77940 | 1.46998  | -0.72145 |
| O  | -2.99784 | -0.04698 | 0.98320  |
| H  | -3.28533 | -0.92173 | 1.25012  |
| O  | -0.27453 | -0.08746 | 0.81810  |
| H  | -0.87990 | 1.82733  | -0.81376 |

*07\_e6.mol2*

E = -1185.693542  
H = -1185.569470  
G = -1185.621115  
G(quasi-RRHO) = -1185.620342



|    |          |          |          |
|----|----------|----------|----------|
| Si | -1.33265 | -0.01248 | 0.14476  |
| O  | -0.98266 | 1.52481  | -0.49376 |
| H  | -1.72574 | 1.85368  | -1.00444 |
| O  | -0.97399 | -1.38764 | -0.80147 |
| O  | -1.95852 | -0.20564 | 1.69572  |
| H  | -2.91111 | -0.10237 | 1.69573  |
| H  | -1.66339 | -1.55348 | -1.44695 |
| O  | -2.94905 | 0.13779  | -0.58512 |
| H  | -3.52650 | -0.61423 | -0.44493 |
| Si | 1.67490  | 0.00651  | 0.03866  |
| O  | 3.00006  | -0.03611 | 1.00653  |
| H  | 3.28568  | -0.90664 | 1.28882  |
| O  | 1.78773  | 1.45924  | -0.72151 |
| O  | 1.79309  | -1.25846 | -1.00972 |
| H  | 0.89368  | -1.59181 | -1.17382 |
| O  | 0.27935  | -0.08607 | 0.82638  |
| H  | 0.88796  | 1.81512  | -0.81877 |

*08\_e5.mol2*

E = -1185.693535

H = -1185.569447

G = -1185.621083

G(quasi-RRHO) = -1185.620304

|    |          |          |          |
|----|----------|----------|----------|
| Si | 1.33267  | -0.01394 | 0.14468  |
| O  | 0.97841  | -1.44429 | -0.70549 |
| H  | 1.72023  | -1.69924 | -1.25845 |
| O  | 0.97696  | 1.48379  | -0.59400 |
| O  | 1.96004  | -0.04897 | 1.70676  |
| H  | 2.91242  | -0.15301 | 1.69071  |
| H  | 1.66519  | 1.73854  | -1.21114 |
| O  | 2.94777  | -0.06230 | -0.60096 |
| H  | 3.52683  | 0.66078  | -0.35518 |
| Si | -1.67469 | 0.01197  | 0.03849  |
| O  | -1.78288 | -1.30197 | -0.94901 |
| H  | -0.88421 | -1.64804 | -1.08811 |
| O  | -1.79792 | 1.42619  | -0.78953 |
| O  | -3.00000 | 0.00672  | 1.00713  |
| H  | -3.28045 | -0.85146 | 1.32953  |
| O  | -0.27916 | -0.03325 | 0.83037  |
| H  | -0.89762 | 1.77261  | -0.91388 |

09\_e10.mol2

E = -1185.693291  
H = -1185.569279  
G = -1185.621002  
G(quasi-RRHO) = -1185.620226

|    |          |          |          |
|----|----------|----------|----------|
| Si | 1.33805  | -0.01422 | 0.14808  |
| O  | 0.96904  | -1.40267 | -0.77238 |
| H  | 1.72818  | -1.72372 | -1.26127 |
| O  | 0.97176  | 1.50011  | -0.54734 |
| O  | 1.96663  | -0.13677 | 1.70042  |
| H  | 2.92519  | -0.13597 | 1.66329  |
| H  | 1.73098  | 1.88980  | -0.98347 |
| O  | 3.00485  | 0.03231  | -0.47044 |
| H  | 3.08785  | 0.10246  | -1.42263 |
| Si | -1.67606 | 0.00894  | 0.03861  |
| O  | -1.79364 | -1.27298 | -0.98932 |
| H  | -0.89697 | -1.61530 | -1.14726 |
| O  | -1.80045 | 1.44813  | -0.74537 |
| O  | -2.99771 | -0.02352 | 1.01188  |
| H  | -3.27721 | -0.89049 | 1.31077  |
| O  | -0.27832 | -0.06436 | 0.82305  |
| H  | -0.90314 | 1.80518  | -0.85712 |

10\_e11.mol2

E = -1185.686111  
H = -1185.562687  
G = -1185.619065  
G(quasi-RRHO) = -1185.617169

|    |          |          |          |
|----|----------|----------|----------|
| Si | -1.54810 | -0.05778 | 0.01235  |
| O  | -1.47782 | -0.65786 | 1.58240  |
| H  | -0.60327 | -1.00838 | 1.75588  |
| O  | -1.15774 | 1.54038  | -0.32455 |
| O  | -3.21770 | 0.31323  | 0.25411  |
| H  | -3.58562 | 0.77152  | -0.50188 |
| H  | -0.22640 | 1.69652  | -0.51208 |
| O  | -1.87527 | -1.07537 | -1.29138 |
| H  | -1.05323 | -1.43767 | -1.62747 |
| Si | 1.73292  | -0.03311 | -0.02303 |
| O  | 2.81690  | -0.96726 | -0.83727 |
| H  | 2.48882  | -1.39825 | -1.62863 |
| O  | 2.32854  | 0.06028  | 1.50770  |
| O  | 1.73268  | 1.52697  | -0.56842 |

|   |         |          |          |
|---|---------|----------|----------|
| H | 2.47884 | 2.08360  | -0.33895 |
| O | 0.25421 | -0.57625 | -0.18262 |
| H | 2.68312 | -0.74777 | 1.88292  |

*11\_e14.mol2*

E = -1185.685342  
H = -1185.561969  
G = -1185.619063  
G(quasi-RRHO) = -1185.616778

|    |          |          |          |
|----|----------|----------|----------|
| Si | -1.49680 | -0.02501 | -0.03338 |
| O  | -1.15096 | -0.03470 | 1.60987  |
| H  | -0.20972 | -0.08263 | 1.80616  |
| O  | -1.38135 | 1.45380  | -0.84070 |
| O  | -1.88388 | -1.46053 | -0.84463 |
| H  | -1.08531 | -1.86806 | -1.18404 |
| H  | -2.25093 | 1.85966  | -0.83432 |
| O  | -3.20183 | 0.23550  | 0.28714  |
| H  | -3.72447 | -0.48096 | -0.07218 |
| Si | 1.72738  | -0.01754 | -0.05638 |
| O  | 1.74709  | -0.03858 | 1.60004  |
| H  | 2.52870  | 0.28304  | 2.05247  |
| O  | 2.23813  | 1.43464  | -0.62915 |
| O  | 2.83623  | -1.08612 | -0.63861 |
| H  | 2.78239  | -1.98566 | -0.31068 |
| O  | 0.23978  | -0.34044 | -0.48112 |
| H  | 3.18556  | 1.56163  | -0.70370 |

*12\_e13.mol2*

E = -1185.685808  
H = -1185.562397  
G = -1185.618949  
G(quasi-RRHO) = -1185.617030

|    |          |          |          |
|----|----------|----------|----------|
| Si | -1.54246 | -0.00869 | 0.03507  |
| O  | -1.14987 | 1.46462  | -0.65784 |
| H  | -0.21073 | 1.67220  | -0.63816 |
| O  | -1.44380 | -1.42912 | -0.87106 |
| O  | -1.91299 | -0.14012 | 1.67571  |
| H  | -1.11051 | -0.32027 | 2.16934  |
| H  | -0.57677 | -1.82724 | -0.77384 |
| O  | -3.19663 | 0.24886  | -0.39166 |
| H  | -3.75466 | -0.45584 | -0.06159 |

|    |         |          |          |
|----|---------|----------|----------|
| Si | 1.72586 | -0.02927 | 0.04316  |
| O  | 1.75787 | 1.51980  | -0.54221 |
| H  | 2.52975 | 1.81161  | -1.03030 |
| O  | 2.13632 | -1.11325 | -1.12272 |
| O  | 2.88418 | -0.21183 | 1.19724  |
| H  | 2.90790 | 0.44599  | 1.89463  |
| O  | 0.24707 | -0.28180 | 0.54176  |
| H  | 3.07023 | -1.25242 | -1.28897 |

*13\_e12.mol2*

E = -1185.686164  
H = -1185.562691  
G = -1185.618809  
G(quasi-RRHO) = -1185.617017

|    |          |          |          |
|----|----------|----------|----------|
| Si | -1.54872 | -0.02944 | -0.00471 |
| O  | -1.14680 | 1.47986  | -0.60542 |
| H  | -0.20539 | 1.61061  | -0.75533 |
| O  | -1.88735 | -1.31605 | -1.04062 |
| O  | -1.48736 | -0.34175 | 1.65213  |
| H  | -0.62615 | -0.68934 | 1.89045  |
| H  | -1.07733 | -1.79257 | -1.23225 |
| O  | -3.20619 | 0.45226  | 0.06653  |
| H  | -3.75923 | -0.25521 | 0.39923  |
| Si | 1.73659  | -0.04224 | -0.01402 |
| O  | 2.34431  | 0.21879  | 1.49215  |
| H  | 2.70756  | -0.54211 | 1.94871  |
| O  | 1.74535  | 1.44479  | -0.73519 |
| O  | 2.80681  | -1.07399 | -0.72191 |
| H  | 2.47058  | -1.58697 | -1.45910 |
| O  | 0.25166  | -0.58389 | -0.10193 |
| H  | 2.49641  | 2.01891  | -0.57546 |

TS2, water cleavage of IM1

*00\_h1.mol2*

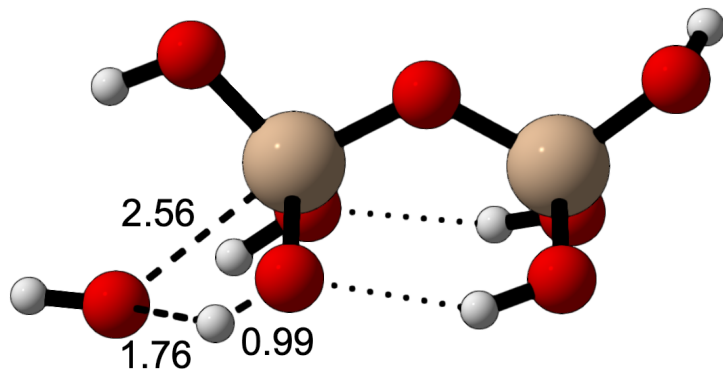

E = -1185.672731  
 H = -1185.552172  
 G = -1185.605881  
 G(quasi-RRHO) = -1185.604633

|    |          |          |          |
|----|----------|----------|----------|
| Si | 1.07563  | 0.38585  | -0.09121 |
| O  | 1.16696  | -0.16963 | 1.45590  |
| H  | 2.05726  | -0.59828 | 1.46880  |
| O  | 1.17126  | -0.81617 | -1.21154 |
| O  | 1.99239  | 1.70439  | -0.40756 |
| H  | 2.92750  | 1.48330  | -0.35091 |
| H  | 2.06067  | -1.20368 | -1.02191 |
| O  | 3.27151  | -0.89951 | 0.22289  |
| H  | 4.20100  | -0.67468 | 0.16586  |
| Si | -1.77424 | -0.04288 | -0.00052 |
| O  | -1.72692 | -0.60902 | 1.53519  |
| H  | -0.82712 | -0.64063 | 1.89141  |
| O  | -1.73931 | -1.22472 | -1.12868 |
| O  | -3.19125 | 0.71978  | -0.23432 |
| H  | -3.54292 | 1.22739  | 0.49952  |
| O  | -0.47662 | 0.92327  | -0.22468 |
| H  | -0.83986 | -1.42222 | -1.42611 |

*01\_h2.mol2*

E = -1185.669444  
 H = -1185.549086  
 G = -1185.604441  
 G(quasi-RRHO) = -1185.602586

|    |          |          |          |
|----|----------|----------|----------|
| Si | -1.19162 | 0.26096  | 0.10025  |
| O  | -1.09547 | -1.07851 | -0.85868 |
| H  | -2.05879 | -1.31945 | -0.91236 |
| O  | -1.77780 | 0.05024  | 1.61548  |

|    |          |          |          |
|----|----------|----------|----------|
| O  | -1.78995 | 1.59596  | -0.66139 |
| H  | -1.12470 | 2.26373  | -0.84107 |
| H  | -2.69207 | -0.25464 | 1.43466  |
| O  | -3.45551 | -0.71780 | -0.15370 |
| H  | -4.05342 | -0.15496 | -0.64795 |
| Si | 1.82779  | -0.04845 | 0.01253  |
| O  | 1.61519  | -1.27299 | -1.04679 |
| H  | 0.67481  | -1.49675 | -1.16389 |
| O  | 2.45879  | -0.52848 | 1.44258  |
| O  | 2.90822  | 1.01132  | -0.61089 |
| H  | 2.82961  | 1.21097  | -1.54579 |
| O  | 0.40516  | 0.64101  | 0.35505  |
| H  | 3.36910  | -0.83008 | 1.44422  |

*02\_h3.mol2*

E = -1185.669461  
H = -1185.548983  
G = -1185.602625  
G(quasi-RRHO) = -1185.601538

|    |          |          |          |
|----|----------|----------|----------|
| Si | 1.11044  | 0.38501  | -0.02867 |
| O  | 1.16836  | -0.38545 | 1.42525  |
| H  | 2.04714  | -0.83789 | 1.36114  |
| O  | 1.17280  | -0.60233 | -1.34508 |
| O  | 2.04368  | 1.73063  | -0.13032 |
| H  | 1.55065  | 2.55032  | -0.20855 |
| H  | 2.04996  | -1.04012 | -1.21128 |
| O  | 3.21093  | -1.00539 | 0.08704  |
| H  | 4.03933  | -0.52475 | 0.05617  |
| Si | -1.75033 | -0.05014 | -0.00663 |
| O  | -1.70718 | -0.84496 | 1.42532  |
| H  | -0.80562 | -0.91822 | 1.77246  |
| O  | -1.70982 | -1.04738 | -1.30180 |
| O  | -3.17168 | 0.73374  | -0.12466 |
| H  | -3.52963 | 1.11447  | 0.67947  |
| O  | -0.45540 | 0.93935  | -0.07681 |
| H  | -0.80684 | -1.17768 | -1.62673 |

*03\_h4.mol2*

E = -1185.665004  
H = -1185.544693  
G = -1185.600640  
G(quasi-RRHO) = -1185.598494

|    |          |          |          |
|----|----------|----------|----------|
| Si | -1.20752 | -0.27306 | -0.00426 |
| O  | -1.09488 | 1.34830  | -0.27783 |
| H  | -2.07223 | 1.56341  | -0.28918 |
| O  | -1.76202 | -1.15357 | -1.28322 |
| O  | -1.76278 | -0.80082 | 1.44951  |
| H  | -2.70352 | -0.58586 | 1.47774  |
| H  | -1.07483 | -1.67996 | -1.69694 |
| O  | -3.45864 | 0.67144  | -0.05560 |
| H  | -3.83999 | 1.07459  | 0.72864  |
| Si | 1.81934  | 0.04335  | 0.03045  |
| O  | 2.48205  | -0.11038 | 1.51812  |
| H  | 3.39835  | 0.15298  | 1.62117  |
| O  | 1.60716  | 1.59722  | -0.42618 |
| O  | 2.87861  | -0.67033 | -0.99457 |
| H  | 2.78233  | -0.46526 | -1.92660 |
| O  | 0.39536  | -0.71818 | 0.08839  |
| H  | 0.66550  | 1.84674  | -0.43052 |

04\_h5.mol2

E = -1185.664783  
H = -1185.544382  
G = -1185.598296  
G(quasi-RRHO) = -1185.597118

|    |          |          |          |
|----|----------|----------|----------|
| Si | -1.12760 | 0.35756  | -0.04124 |
| O  | -1.17073 | -0.76274 | -1.24171 |
| H  | -2.09022 | -1.12534 | -1.07049 |
| O  | -1.14034 | -0.21102 | 1.51035  |
| O  | -2.04101 | 1.69769  | -0.28725 |
| H  | -1.52488 | 2.49472  | -0.42617 |
| H  | -1.99834 | -0.63622 | 1.64406  |
| O  | -3.31141 | -0.81476 | 0.00972  |
| H  | -3.47483 | -1.64977 | 0.45545  |
| Si | 1.75178  | -0.04708 | 0.00309  |
| O  | 1.67477  | -1.19585 | -1.16202 |
| H  | 0.76314  | -1.34941 | -1.45501 |
| O  | 1.78777  | -0.66640 | 1.51721  |
| O  | 3.15998  | 0.75651  | -0.14655 |
| H  | 3.47554  | 0.92170  | -1.03695 |
| O  | 0.44135  | 0.90969  | -0.13632 |
| H  | 0.90814  | -0.70731 | 1.91567  |

05\_h7.mol2

E = -1185.660865  
H = -1185.542638  
G = -1185.598108  
G(quasi-RRHO) = -1185.596326

|    |          |          |          |
|----|----------|----------|----------|
| Si | -1.22395 | -0.25515 | 0.09304  |
| O  | -1.13613 | 1.21165  | -0.62407 |
| H  | -2.20537 | 1.32055  | -0.64231 |
| O  | -1.75360 | -1.51237 | -0.83632 |
| O  | -1.80236 | -0.30464 | 1.64071  |
| H  | -1.12572 | -0.55786 | 2.27291  |
| H  | -1.05772 | -2.15047 | -1.00902 |
| O  | -3.41395 | 0.67602  | -0.36210 |
| H  | -3.74639 | 0.97089  | 0.48792  |
| Si | 1.79818  | 0.05274  | -0.01722 |
| O  | 2.80617  | 0.13207  | 1.27300  |
| H  | 2.65395  | 0.84640  | 1.89478  |
| O  | 1.52892  | 1.56034  | -0.58197 |
| O  | 2.55514  | -0.92068 | -1.09384 |
| H  | 3.47911  | -0.73991 | -1.27561 |
| O  | 0.38964  | -0.66334 | 0.32676  |
| H  | 0.57232  | 1.71165  | -0.72756 |

06\_h8.mol2

E = -1185.660896  
H = -1185.542608  
G = -1185.597945  
G(quasi-RRHO) = -1185.596214

|    |          |          |          |
|----|----------|----------|----------|
| Si | 1.22453  | -0.25617 | 0.09327  |
| O  | 1.13370  | 1.34022  | -0.24980 |
| H  | 2.20030  | 1.43783  | -0.31700 |
| O  | 1.78034  | -0.67974 | 1.58857  |
| O  | 1.77899  | -1.24973 | -1.10554 |
| H  | 1.09712  | -1.84150 | -1.43194 |
| H  | 1.08998  | -1.06553 | 2.13245  |
| O  | 3.41244  | 0.75570  | -0.15102 |
| H  | 3.73693  | 0.46235  | -1.00468 |
| Si | -1.79765 | 0.04969  | -0.02747 |
| O  | -2.50890 | -0.67255 | -1.31300 |
| H  | -3.43064 | -0.46643 | -1.47819 |
| O  | -1.53432 | 1.64599  | -0.24323 |
| O  | -2.84387 | -0.16087 | 1.21665  |



|   |          |          |          |
|---|----------|----------|----------|
| H | -2.72426 | 0.40719  | 1.98018  |
| O | -0.38960 | -0.71361 | 0.19682  |
| H | -0.57590 | 1.83346  | -0.31748 |

07\_h9.mol2

E = -1185.656649  
H = -1185.537100  
G = -1185.592669  
G(quasi-RRHO) = -1185.591026

|    |          |          |          |
|----|----------|----------|----------|
| Si | 1.23977  | 0.14017  | -0.04293 |
| O  | 1.14531  | -0.67923 | 1.38312  |
| H  | 0.23448  | -0.82041 | 1.67282  |
| O  | 1.69741  | -0.70812 | -1.35357 |
| O  | 1.89456  | 1.64992  | 0.11745  |
| H  | 1.22819  | 2.33962  | 0.07623  |
| H  | 2.68063  | -0.81133 | -1.06650 |
| O  | 3.65810  | -0.51960 | 0.05486  |
| H  | 4.13475  | 0.29129  | -0.13262 |
| Si | -1.83804 | -0.00430 | -0.04978 |
| O  | -1.71701 | -0.71764 | 1.42520  |
| H  | -2.45378 | -1.24007 | 1.74806  |
| O  | -2.41366 | -1.14402 | -1.06601 |
| O  | -2.91122 | 1.22705  | -0.09652 |
| H  | -2.62453 | 2.07709  | 0.24316  |
| O  | -0.36109 | 0.53092  | -0.38113 |
| H  | -2.76320 | -0.85270 | -1.91041 |

TS-iso, isomerization of IM1 to IM2

00\_f1.mol2

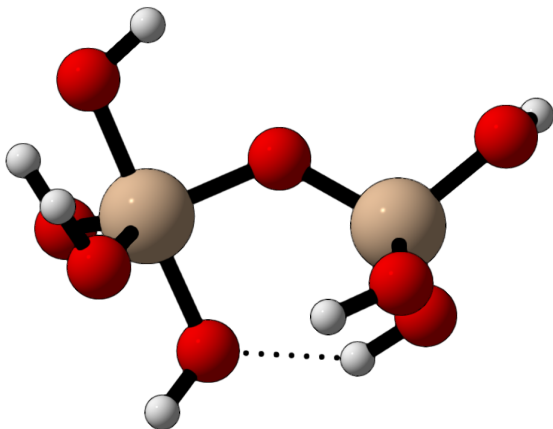

E = -1185.687114  
H = -1185.564840  
G = -1185.617065  
G(quasi-RRHO) = -1185.616336

|    |          |          |          |
|----|----------|----------|----------|
| Si | 1.34741  | 0.00244  | -0.05384 |
| O  | 2.37443  | 0.72661  | -1.17708 |
| H  | 2.94014  | 0.05019  | -1.55631 |
| O  | 1.78047  | -0.03237 | 1.58330  |
| O  | 2.12231  | -1.56115 | -0.34415 |
| H  | 1.46414  | -2.23936 | -0.49578 |
| H  | 2.27271  | -0.83710 | 1.75926  |
| O  | 0.53659  | 1.55390  | 0.23164  |
| H  | 1.00834  | 2.09377  | 0.86664  |
| Si | -1.60892 | -0.09990 | -0.05457 |
| O  | -1.97846 | 1.34246  | -0.74647 |
| H  | -1.20437 | 1.91623  | -0.63516 |
| O  | -1.72543 | -0.09291 | 1.58503  |
| O  | -2.80066 | -1.13689 | -0.49232 |
| H  | -3.13100 | -1.05491 | -1.38834 |
| O  | -0.15549 | -0.64524 | -0.52142 |
| H  | -0.91891 | 0.20029  | 2.01917  |

*01\_f2.mol2*

E = -1185.686076  
H = -1185.563590  
G = -1185.615311  
G(quasi-RRHO) = -1185.614502

|    |          |          |          |
|----|----------|----------|----------|
| Si | 1.33966  | -0.00694 | 0.13298  |
| O  | 0.96515  | -1.47028 | -0.65382 |
| H  | 1.71989  | -1.74450 | -1.18043 |
| O  | 0.98724  | 1.50167  | -0.56677 |
| O  | 2.05768  | 0.06266  | 1.66077  |
| H  | 2.29030  | -0.78339 | 2.04405  |
| H  | 1.72573  | 1.76775  | -1.11950 |
| O  | 2.91467  | -0.03606 | -0.69824 |
| H  | 3.61508  | 0.20457  | -0.09160 |
| Si | -1.67611 | 0.01141  | 0.03675  |
| O  | -1.79763 | -1.32432 | -0.92066 |
| H  | -0.90222 | -1.68191 | -1.04887 |
| O  | -1.78628 | 1.40632  | -0.82647 |
| O  | -3.00393 | 0.03862  | 1.00284  |
| H  | -3.29460 | -0.81094 | 1.33877  |

|   |          |          |          |
|---|----------|----------|----------|
| O | -0.28147 | -0.02555 | 0.82913  |
| H | -0.88741 | 1.76152  | -0.93287 |

*02\_f4.mol2*

E = -1185.685960  
H = -1185.563400  
G = -1185.614948  
G(quasi-RRHO) = -1185.614294

|    |          |          |          |
|----|----------|----------|----------|
| Si | 1.38176  | -0.02028 | 0.13873  |
| O  | 0.91579  | -1.36258 | -0.79320 |
| H  | 1.66210  | -1.65591 | -1.32049 |
| O  | 1.10352  | 1.47226  | -0.66646 |
| O  | 1.97895  | -0.10675 | 1.70689  |
| H  | 1.24206  | -0.14349 | 2.32014  |
| H  | 1.25002  | 2.24266  | -0.11407 |
| O  | 3.02648  | -0.11769 | -0.45875 |
| H  | 3.14370  | 0.47927  | -1.19788 |
| Si | -1.66105 | 0.01259  | 0.02899  |
| O  | -1.86646 | -1.40956 | -0.77765 |
| H  | -0.98502 | -1.75938 | -0.98680 |
| O  | -1.68252 | 1.30429  | -0.98860 |
| O  | -2.99012 | 0.21249  | 0.97229  |
| H  | -3.32943 | -0.57805 | 1.39527  |
| O  | -0.27379 | -0.00494 | 0.83587  |
| H  | -0.76819 | 1.62227  | -1.08726 |

*03\_f5.mol2*

E = -1185.682968  
H = -1185.560699  
G = -1185.614873  
G(quasi-RRHO) = -1185.613028

|    |          |          |          |
|----|----------|----------|----------|
| Si | -1.45169 | -0.07447 | 0.01015  |
| O  | -0.89062 | 1.55496  | -0.20819 |
| H  | -1.61748 | 2.11764  | -0.48047 |
| O  | -1.84411 | -1.62603 | -0.60645 |
| O  | -1.78327 | -0.19531 | 1.65550  |
| H  | -1.29057 | 0.43355  | 2.18375  |
| H  | -1.08466 | -2.20612 | -0.53856 |
| O  | -2.95416 | 0.48082  | -0.65684 |
| H  | -3.49506 | -0.25984 | -0.93265 |
| Si | 1.73909  | -0.02844 | -0.03739 |

|   |         |          |          |
|---|---------|----------|----------|
| O | 2.56493 | -0.46196 | 1.31899  |
| H | 2.08375 | -0.38290 | 2.14422  |
| O | 1.74347 | 1.59512  | -0.25488 |
| O | 2.68125 | -0.73628 | -1.18522 |
| H | 2.55296 | -0.42349 | -2.08213 |
| O | 0.23523 | -0.57657 | -0.01621 |
| H | 0.80570 | 1.88393  | -0.28637 |

*04\_f3.mol2*

E = -1185.686749  
H = -1185.563946  
G = -1185.614295  
G(quasi-RRHO) = -1185.613663

|    |          |          |          |
|----|----------|----------|----------|
| Si | 1.35562  | -0.02295 | -0.10171 |
| O  | 2.94087  | 0.64659  | -0.23377 |
| H  | 3.57074  | -0.02290 | -0.50388 |
| O  | 1.19219  | -0.45357 | 1.53703  |
| O  | 1.97003  | -1.44034 | -0.85894 |
| H  | 1.24707  | -2.01057 | -1.12440 |
| H  | 1.60201  | -1.29884 | 1.73048  |
| O  | 0.77196  | 1.60536  | -0.05565 |
| H  | 1.49591  | 2.21576  | 0.09430  |
| Si | -1.64406 | -0.04549 | -0.05404 |
| O  | -1.95589 | 1.54229  | -0.34906 |
| H  | -1.09966 | 2.00278  | -0.33296 |
| O  | -1.61668 | -0.39445 | 1.55014  |
| O  | -2.91931 | -0.89069 | -0.64539 |
| H  | -3.30396 | -0.56172 | -1.45958 |
| O  | -0.23082 | -0.47396 | -0.70244 |
| H  | -0.69275 | -0.49621 | 1.84134  |

*05\_f6.mol2*

E = -1185.682286  
H = -1185.559493  
G = -1185.611285  
G(quasi-RRHO) = -1185.610156

|    |         |          |          |
|----|---------|----------|----------|
| Si | 1.59248 | 0.00449  | -0.15180 |
| O  | 2.82870 | 0.02195  | -1.22030 |
| H  | 3.06845 | -0.81629 | -1.61907 |
| O  | 1.74977 | -1.32185 | 0.80425  |
| O  | 1.75838 | 1.39918  | 0.69342  |

|    |          |          |          |
|----|----------|----------|----------|
| H  | 0.88648  | 1.62475  | 1.06619  |
| H  | 0.87369  | -1.52680 | 1.18068  |
| O  | 0.13337  | -0.02880 | -0.85605 |
| Si | -1.32911 | -0.00206 | -0.00529 |
| O  | -2.24276 | -1.27748 | -0.73320 |
| H  | -2.72858 | -1.06555 | -1.52877 |
| O  | -2.25386 | 1.21702  | -0.81029 |
| H  | -2.73799 | 0.95270  | -1.59137 |
| O  | -1.00343 | 1.22258  | 1.19400  |
| H  | -1.35795 | 2.05690  | 0.88021  |
| O  | -1.01114 | -1.14072 | 1.27731  |
| H  | -1.36339 | -1.99469 | 1.01818  |

IM2, co-linear OH groups on Si

[00\\_g3.mol2](#)

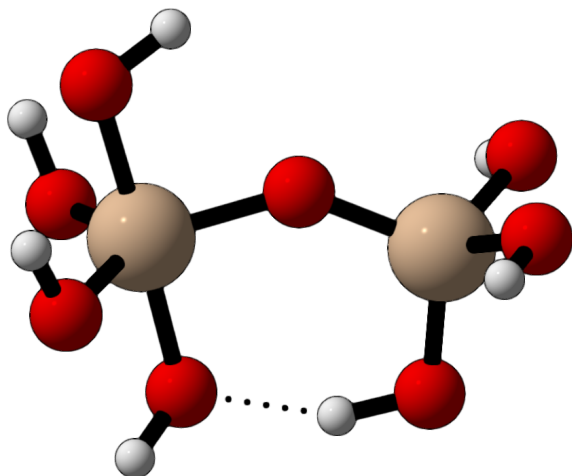

E = -1185.688537  
H = -1185.565410  
G = -1185.621543  
G(quasi-RRHO) = -1185.619231

|    |          |          |          |
|----|----------|----------|----------|
| Si | -1.41078 | -0.01820 | 0.02256  |
| O  | -0.87000 | 1.67430  | 0.09830  |
| H  | -1.36143 | 2.20285  | -0.53140 |
| O  | -1.99850 | -1.68583 | -0.12602 |
| O  | -2.13740 | 0.15022  | 1.53430  |
| H  | -2.53154 | -0.69115 | 1.77430  |
| H  | -1.26997 | -2.30326 | -0.06347 |
| O  | -2.25192 | 0.38623  | -1.39094 |
| H  | -2.67975 | -0.40035 | -1.73544 |

|    |         |          |          |
|----|---------|----------|----------|
| Si | 1.71250 | -0.05981 | -0.01314 |
| O  | 2.62114 | -0.71757 | 1.18468  |
| H  | 2.45216 | -0.39441 | 2.07119  |
| O  | 1.72177 | 1.56779  | 0.06994  |
| O  | 2.51368 | -0.62708 | -1.32922 |
| H  | 2.10558 | -0.46006 | -2.18042 |
| O  | 0.18743 | -0.58780 | 0.01654  |
| H  | 0.77135 | 1.85651  | 0.07281  |

*01\_g2.mol2*

E = -1185.688933  
H = -1185.565772  
G = -1185.621396  
G(quasi-RRHO) = -1185.619301

|    |          |          |          |
|----|----------|----------|----------|
| Si | -1.41156 | -0.05210 | 0.01298  |
| O  | -0.90505 | 1.68264  | -0.06409 |
| H  | -1.24968 | 2.07913  | -0.86573 |
| O  | -2.10950 | -1.65067 | 0.03786  |
| O  | -1.97484 | 0.22988  | 1.58350  |
| H  | -1.79366 | 1.13818  | 1.83287  |
| H  | -2.08417 | -2.03663 | 0.91371  |
| O  | -2.17771 | 0.21589  | -1.47448 |
| H  | -2.67691 | -0.56261 | -1.72919 |
| Si | 1.69563  | -0.08081 | -0.01999 |
| O  | 2.58657  | -0.72003 | 1.20197  |
| H  | 2.44840  | -0.33607 | 2.06936  |
| O  | 1.69206  | 1.54729  | 0.07582  |
| O  | 2.52955  | -0.64197 | -1.31912 |
| H  | 2.08437  | -0.58222 | -2.16597 |
| O  | 0.17785  | -0.62237 | -0.03867 |
| H  | 0.74323  | 1.83572  | 0.02079  |

*02\_g4.mol2*

E = -1185.688565  
H = -1185.565432  
G = -1185.620556  
G(quasi-RRHO) = -1185.618797

|    |         |          |          |
|----|---------|----------|----------|
| Si | 1.40910 | -0.02021 | -0.01704 |
| O  | 0.86501 | 1.66261  | -0.19977 |
| H  | 1.37826 | 2.23675  | 0.36984  |
| O  | 1.98186 | -1.67886 | 0.24512  |

|    |          |          |          |
|----|----------|----------|----------|
| O  | 2.20955  | 0.07145  | -1.49792 |
| H  | 2.62022  | -0.77836 | -1.67127 |
| H  | 1.25825  | -2.30019 | 0.16705  |
| O  | 2.19620  | 0.45741  | 1.40439  |
| H  | 2.61275  | -0.30932 | 1.80329  |
| Si | -1.70846 | -0.04597 | 0.00317  |
| O  | -2.62093 | -0.78614 | -1.14736 |
| H  | -2.24403 | -0.83377 | -2.02796 |
| O  | -1.73037 | 1.57476  | -0.13217 |
| O  | -2.45604 | -0.41643 | 1.41630  |
| H  | -2.69715 | -1.33489 | 1.54922  |
| O  | -0.18976 | -0.58713 | -0.06815 |
| H  | -0.78148 | 1.86496  | -0.15957 |

*03\_g6.mol2*

E = -1185.688589  
H = -1185.565435  
G = -1185.620528  
G(quasi-RRHO) = -1185.618565

|    |          |          |          |
|----|----------|----------|----------|
| Si | 1.41244  | -0.05190 | -0.00560 |
| O  | 0.89465  | 1.68099  | -0.01597 |
| H  | 1.23040  | 2.11926  | 0.76740  |
| O  | 2.11748  | -1.64675 | 0.04678  |
| O  | 1.96466  | 0.15105  | -1.59200 |
| H  | 1.77573  | 1.04351  | -1.88831 |
| H  | 2.09389  | -2.07372 | -0.80989 |
| O  | 2.18816  | 0.29717  | 1.45957  |
| H  | 2.69468  | -0.46402 | 1.74970  |
| Si | -1.68058 | -0.07283 | 0.01897  |
| O  | -1.70343 | 1.53586  | -0.23014 |
| H  | -0.76295 | 1.84397  | -0.16058 |
| O  | -2.38526 | -0.51892 | 1.43862  |
| O  | -2.54586 | -0.71426 | -1.22440 |
| H  | -2.80908 | -1.63203 | -1.13586 |
| O  | -0.17331 | -0.62766 | 0.08816  |
| H  | -3.32536 | -0.35049 | 1.52527  |

*04\_g5.mol2*

E = -1185.688400  
H = -1185.565267  
G = -1185.620403  
G(quasi-RRHO) = -1185.618640

|    |          |          |          |
|----|----------|----------|----------|
| Si | -1.41170 | -0.01428 | 0.02354  |
| O  | -2.14952 | 0.25586  | 1.51480  |
| H  | -2.55308 | -0.56530 | 1.80412  |
| O  | -2.24021 | 0.30457  | -1.41900 |
| O  | -2.00974 | -1.68418 | -0.02316 |
| H  | -1.28725 | -2.30146 | 0.09046  |
| H  | -2.67121 | -0.49942 | -1.71606 |
| O  | -0.85687 | 1.67486  | -0.00666 |
| H  | -1.34321 | 2.16701  | -0.66895 |
| Si | 1.70051  | -0.06603 | -0.01113 |
| O  | 1.73760  | 1.56235  | 0.05780  |
| H  | 0.79411  | 1.86608  | 0.00916  |
| O  | 2.32535  | -0.67640 | -1.40135 |
| O  | 2.65359  | -0.68205 | 1.17875  |
| H  | 2.60823  | -0.23965 | 2.02847  |
| O  | 0.18195  | -0.59430 | 0.07448  |
| H  | 3.27189  | -0.58866 | -1.52637 |

05\_g8.mol2

E = -1185.688093

H = -1185.564943

G = -1185.619948

G(quasi-RRHO) = -1185.618186

|    |          |          |          |
|----|----------|----------|----------|
| Si | 1.41066  | -0.01668 | -0.02262 |
| O  | 0.85583  | 1.67216  | -0.07219 |
| H  | 1.34214  | 2.19469  | 0.56639  |
| O  | 2.00789  | -1.68279 | 0.10396  |
| O  | 2.14808  | 0.18214  | -1.52514 |
| H  | 2.55074  | -0.65198 | -1.77596 |
| H  | 1.28548  | -2.30479 | 0.01966  |
| O  | 2.24067  | 0.37009  | 1.40238  |
| H  | 2.67103  | -0.41934 | 1.73707  |
| Si | -1.69815 | -0.05363 | 0.00520  |
| O  | -1.74234 | 1.56703  | -0.13119 |
| H  | -0.79909 | 1.87249  | -0.10029 |
| O  | -2.32314 | -0.60220 | 1.42575  |
| O  | -2.61491 | -0.62422 | -1.23450 |
| H  | -2.87871 | -1.54481 | -1.18595 |
| O  | -0.18342 | -0.59725 | -0.04366 |
| H  | -3.25590 | -0.44156 | 1.57975  |



06\_g7.mol2

E = -1185.688093  
H = -1185.564941  
G = -1185.619944  
G(quasi-RRHO) = -1185.618180

|    |          |          |          |
|----|----------|----------|----------|
| Si | 1.41070  | -0.01663 | -0.02250 |
| O  | 2.14690  | 0.18165  | -1.52572 |
| H  | 2.54984  | -0.65240 | -1.77629 |
| O  | 2.24202  | 0.37043  | 1.40165  |
| O  | 2.00792  | -1.68279 | 0.10438  |
| H  | 1.28580  | -2.30491 | 0.01857  |
| H  | 2.67213  | -0.41910 | 1.73640  |
| O  | 0.85535  | 1.67185  | -0.07212 |
| H  | 1.34294  | 2.19554  | 0.56449  |
| Si | -1.69814 | -0.05358 | 0.00543  |
| O  | -1.74194 | 1.56714  | -0.13072 |
| H  | -0.79873 | 1.87249  | -0.09947 |
| O  | -2.32415 | -0.60236 | 1.42538  |
| O  | -2.61406 | -0.62395 | -1.23500 |
| H  | -2.87969 | -1.54396 | -1.18574 |
| O  | -0.18337 | -0.59713 | -0.04249 |
| H  | -3.25742 | -0.44357 | 1.57813  |

07\_g1.mol2

E = -1185.687836  
H = -1185.564667  
G = -1185.619722  
G(quasi-RRHO) = -1185.618140

|    |          |          |          |
|----|----------|----------|----------|
| Si | 1.35319  | 0.01789  | -0.01171 |
| O  | 2.12200  | -0.44521 | 1.42133  |
| H  | 2.69019  | 0.26997  | 1.71536  |
| O  | 2.10170  | -0.38200 | -1.47039 |
| O  | 2.16893  | 1.58540  | 0.04076  |
| H  | 1.53570  | 2.29770  | -0.04613 |
| H  | 2.66490  | 0.34825  | -1.73594 |
| O  | 0.46872  | -1.51963 | -0.01118 |
| H  | 1.01991  | -2.26244 | 0.23723  |
| Si | -1.62059 | 0.11566  | -0.00575 |
| O  | -1.87471 | -0.65075 | 1.42890  |
| H  | -1.15364 | -1.26506 | 1.60581  |
| O  | -1.90292 | -0.84927 | -1.30300 |
| O  | -2.80023 | 1.24493  | -0.14355 |

|   |          |          |          |
|---|----------|----------|----------|
| H | -2.86022 | 1.89617  | 0.55707  |
| O | -0.15536 | 0.80771  | -0.05212 |
| H | -1.17822 | -1.48371 | -1.37501 |

*08\_g9.mol2*

E = -1185.688606  
H = -1185.564943  
G = -1185.617302  
G(quasi-RRHO) = -1185.616586

|    |          |          |          |
|----|----------|----------|----------|
| Si | 1.32812  | 0.00902  | -0.07429 |
| O  | 0.67185  | 1.60473  | 0.29241  |
| H  | 1.34789  | 2.21065  | 0.59764  |
| O  | 1.33997  | -0.40187 | 1.57935  |
| O  | 2.67794  | 0.76559  | -0.75513 |
| H  | 3.26623  | 0.10157  | -1.12137 |
| H  | 1.71981  | -1.27763 | 1.68331  |
| O  | 2.00265  | -1.53838 | -0.57426 |
| H  | 1.30674  | -2.16610 | -0.77046 |
| Si | -1.60564 | -0.04676 | -0.10022 |
| O  | -2.85245 | -0.82880 | -0.81703 |
| H  | -2.94754 | -1.76046 | -0.61204 |
| O  | -1.98726 | 1.53282  | -0.30478 |
| O  | -1.55424 | -0.49630 | 1.48078  |
| H  | -0.64179 | -0.51960 | 1.81472  |
| O  | -0.17356 | -0.39912 | -0.77569 |
| H  | -1.16529 | 2.03049  | -0.15391 |

*09\_g10.mol2*

E = -1185.688470  
H = -1185.564808  
G = -1185.617170  
G(quasi-RRHO) = -1185.616465

|    |         |          |          |
|----|---------|----------|----------|
| Si | 1.32946 | 0.01261  | -0.07763 |
| O  | 2.67784 | 0.77880  | -0.75136 |
| H  | 3.26631 | 0.11997  | -1.12652 |
| O  | 1.34516 | -0.41827 | 1.57089  |
| O  | 2.00494 | -1.52720 | -0.59934 |
| H  | 1.30904 | -2.15347 | -0.80032 |
| H  | 1.72745 | -1.29428 | 1.66336  |
| O  | 0.67384 | 1.60406  | 0.30720  |
| H  | 1.35334 | 2.21078  | 0.60298  |

|    |          |          |          |
|----|----------|----------|----------|
| Si | -1.60523 | -0.06176 | -0.08689 |
| O  | -1.98524 | 1.52431  | -0.26900 |
| H  | -1.16016 | 2.02038  | -0.12626 |
| O  | -1.55131 | -0.53496 | 1.48344  |
| O  | -2.83403 | -0.92328 | -0.74100 |
| H  | -3.24989 | -0.55102 | -1.52052 |
| O  | -0.17466 | -0.39153 | -0.77616 |
| H  | -0.63764 | -0.55976 | 1.81324  |

*10\_g11.mol2*

E = -1185.685074  
H = -1185.561685  
G = -1185.615454  
G(quasi-RRHO) = -1185.613893

|    |          |          |          |
|----|----------|----------|----------|
| Si | 1.39261  | -0.01576 | -0.00229 |
| O  | 0.87968  | 1.67545  | -0.25837 |
| H  | 1.10373  | 2.19235  | 0.51687  |
| O  | 1.98213  | -1.66757 | 0.25867  |
| O  | 1.90849  | -0.01839 | -1.61105 |
| H  | 2.18171  | -0.90248 | -1.86194 |
| H  | 2.93407  | -1.73966 | 0.16729  |
| O  | 2.28737  | 0.55872  | 1.32201  |
| H  | 2.67764  | -0.16745 | 1.81086  |
| Si | -1.68116 | -0.06885 | 0.03154  |
| O  | -1.69754 | 1.42814  | -0.60770 |
| H  | -0.76437 | 1.76305  | -0.55807 |
| O  | -2.42131 | -0.16078 | 1.49904  |
| O  | -2.50989 | -1.00225 | -1.03937 |
| H  | -2.76470 | -1.87647 | -0.73890 |
| O  | -0.17409 | -0.57339 | 0.27908  |
| H  | -3.36716 | -0.00430 | 1.51602  |

*11\_g12.mol2*

E = -1185.684442  
H = -1185.560682  
G = -1185.613247  
G(quasi-RRHO) = -1185.612280

|    |         |          |          |
|----|---------|----------|----------|
| Si | 1.60274 | -0.04896 | -0.12308 |
| O  | 2.84292 | -0.69062 | -0.97424 |
| H  | 2.94542 | -1.64301 | -0.93419 |
| O  | 1.59491 | -0.72247 | 1.37783  |

|    |          |          |          |
|----|----------|----------|----------|
| O  | 1.94575  | 1.55185  | -0.08675 |
| H  | 1.11294  | 1.98928  | 0.16769  |
| H  | 0.69455  | -0.77981 | 1.73703  |
| O  | 0.15875  | -0.31741 | -0.80708 |
| Si | -1.31537 | 0.01123  | -0.04476 |
| O  | -1.97269 | -1.49897 | -0.68333 |
| H  | -2.89433 | -1.64051 | -0.45932 |
| O  | -2.53062 | 0.91222  | -0.81288 |
| H  | -3.06120 | 0.36896  | -1.39738 |
| O  | -0.72409 | 1.55031  | 0.61442  |
| H  | -1.26625 | 2.26888  | 0.28735  |
| O  | -1.31174 | -0.59923 | 1.54927  |
| H  | -1.57991 | -1.52089 | 1.53074  |

*12\_g13.mol2*

E = -1185.679583  
H = -1185.556574  
G = -1185.612568  
G(quasi-RRHO) = -1185.611026

|    |          |          |          |
|----|----------|----------|----------|
| Si | 1.41607  | -0.04707 | 0.00113  |
| O  | 2.29341  | -0.48363 | 1.37700  |
| H  | 2.75058  | 0.29757  | 1.69431  |
| O  | 2.04074  | -0.20739 | -1.56501 |
| O  | 2.11482  | 1.59629  | 0.12206  |
| H  | 1.41869  | 2.25244  | 0.09420  |
| H  | 2.45599  | 0.62213  | -1.81066 |
| O  | 0.79652  | -1.67248 | -0.03845 |
| H  | 0.24042  | -1.82359 | -0.80483 |
| Si | -1.64616 | 0.10742  | 0.04580  |
| O  | -2.02547 | -0.56723 | 1.48969  |
| H  | -2.93022 | -0.86503 | 1.60198  |
| O  | -1.93030 | -1.02395 | -1.11264 |
| O  | -2.66324 | 1.34515  | -0.32711 |
| H  | -2.44469 | 2.20532  | 0.03629  |
| O  | -0.14282 | 0.65799  | 0.11944  |
| H  | -2.13878 | -0.69169 | -1.98815 |

*13\_g14.mol2*

E = -1185.680522  
H = -1185.556752  
G = -1185.610029  
G(quasi-RRHO) = -1185.608871

|    |          |          |          |
|----|----------|----------|----------|
| Si | 1.36929  | 0.05900  | -0.07430 |
| O  | 1.01391  | 1.74065  | 0.15960  |
| H  | 0.08887  | 1.97033  | 0.05994  |
| O  | 1.28936  | -0.27006 | 1.60092  |
| O  | 2.83688  | 0.53311  | -0.76544 |
| H  | 3.30533  | -0.25229 | -1.05587 |
| H  | 1.57787  | -1.17528 | 1.74379  |
| O  | 1.83256  | -1.61608 | -0.44627 |
| H  | 1.06043  | -2.14707 | -0.64163 |
| Si | -1.60756 | -0.07065 | -0.09278 |
| O  | -2.76264 | -1.04052 | -0.72605 |
| H  | -3.17632 | -0.75191 | -1.54150 |
| O  | -2.02024 | 1.51415  | -0.29067 |
| O  | -1.53257 | -0.48444 | 1.48729  |
| H  | -0.61816 | -0.43198 | 1.82091  |
| O  | -0.17144 | -0.23724 | -0.79846 |
| H  | -2.78872 | 1.83454  | 0.18607  |

TS3, water cleavage from IM2

[00\\_k1.mol2](#)

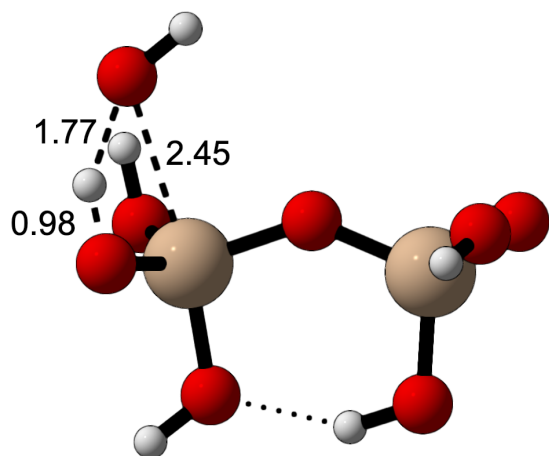

E = -1185.668344  
H = -1185.547782  
G = -1185.604143  
G(quasi-RRHO) = -1185.601940

|    |          |          |          |
|----|----------|----------|----------|
| Si | -1.29993 | 0.32124  | 0.02647  |
| O  | -2.20193 | 0.21651  | 1.39138  |
| H  | -2.54783 | -0.70022 | 1.32018  |
| O  | -2.05231 | 0.21073  | -1.42659 |

|    |          |          |          |
|----|----------|----------|----------|
| O  | -2.40203 | -1.86716 | -0.03713 |
| H  | -1.76830 | -2.58596 | -0.01706 |
| H  | -2.41416 | -0.70344 | -1.37697 |
| O  | -0.76740 | 1.91428  | 0.03670  |
| H  | -1.35844 | 2.55378  | -0.36417 |
| Si | 1.71801  | -0.14459 | 0.00810  |
| O  | 2.54409  | -0.71921 | 1.29501  |
| H  | 2.27592  | -0.40632 | 2.16073  |
| O  | 1.91157  | 1.46466  | -0.18477 |
| O  | 2.42224  | -0.97582 | -1.20905 |
| H  | 2.18977  | -0.71945 | -2.10317 |
| O  | 0.13475  | -0.47456 | 0.14119  |
| H  | 1.05792  | 1.93310  | -0.15735 |

*01\_k2.mol2*

E = -1185.668359  
H = -1185.547784  
G = -1185.603431  
G(quasi-RRHO) = -1185.601596

|    |          |          |          |
|----|----------|----------|----------|
| Si | 1.29880  | 0.32266  | -0.02681 |
| O  | 2.24361  | 0.23067  | -1.36308 |
| H  | 2.58260  | -0.68888 | -1.29171 |
| O  | 2.00447  | 0.18818  | 1.44743  |
| O  | 2.38669  | -1.87484 | 0.04122  |
| H  | 1.74505  | -2.58478 | -0.01353 |
| H  | 2.36274  | -0.72723 | 1.39727  |
| O  | 0.77197  | 1.91740  | -0.03134 |
| H  | 1.35023  | 2.54775  | 0.40148  |
| Si | -1.71191 | -0.13205 | -0.01308 |
| O  | -2.56466 | -0.77640 | -1.25192 |
| H  | -2.23605 | -0.62244 | -2.13984 |
| O  | -1.92141 | 1.47797  | 0.11763  |
| O  | -2.34233 | -0.79806 | 1.33871  |
| H  | -2.49772 | -1.74439 | 1.33185  |
| O  | -0.13514 | -0.46452 | -0.20344 |
| H  | -1.06890 | 1.94828  | 0.11105  |

*02\_k4.mol2*

E = -1185.664819  
H = -1185.543891  
G = -1185.601138  
G(quasi-RRHO) = -1185.598427

|    |          |          |          |
|----|----------|----------|----------|
| Si | -1.34329 | 0.33306  | 0.01230  |
| O  | -2.40422 | 0.32345  | 1.26725  |
| H  | -2.68863 | -0.61331 | 1.27048  |
| O  | -1.88338 | 0.03966  | -1.51682 |
| O  | -2.21843 | -1.89015 | 0.07876  |
| H  | -1.50703 | -2.49760 | 0.28753  |
| H  | -2.16041 | -0.89603 | -1.45074 |
| O  | -0.98150 | 1.95876  | -0.03925 |
| H  | -0.07735 | 2.14424  | -0.31345 |
| Si | 1.68199  | -0.14404 | 0.04727  |
| O  | 2.61117  | -0.42841 | 1.35713  |
| H  | 2.41667  | 0.06890  | 2.15358  |
| O  | 1.79273  | 1.40937  | -0.48334 |
| O  | 2.30453  | -1.20370 | -1.02635 |
| H  | 1.90017  | -1.24040 | -1.89516 |
| O  | 0.11954  | -0.37762 | 0.34673  |
| H  | 2.65119  | 1.73716  | -0.75900 |

03\_k5.mol2

E = -1185.664778

H = -1185.543903

G = -1185.600770

G(quasi-RRHO) = -1185.598324

|    |          |          |          |
|----|----------|----------|----------|
| Si | 1.34415  | 0.32939  | -0.01584 |
| O  | 2.42613  | 0.27649  | -1.25175 |
| H  | 2.70295  | -0.66203 | -1.22402 |
| O  | 1.85711  | 0.07762  | 1.52965  |
| O  | 2.20243  | -1.90097 | -0.00401 |
| H  | 1.48855  | -2.50822 | -0.20473 |
| H  | 2.12783  | -0.86143 | 1.49656  |
| O  | 0.99283  | 1.95846  | -0.01555 |
| H  | 0.07978  | 2.15923  | 0.21423  |
| Si | -1.67726 | -0.13144 | -0.04710 |
| O  | -2.58640 | -0.58282 | -1.32763 |
| H  | -2.24847 | -0.38228 | -2.20280 |
| O  | -1.81545 | 1.45964  | 0.32904  |
| O  | -2.25310 | -0.96305 | 1.23308  |
| H  | -2.45843 | -1.89135 | 1.10623  |
| O  | -0.11903 | -0.37724 | -0.35939 |
| H  | -2.66498 | 1.78966  | 0.62801  |

04\_k3.mol2

E = -1185.667520  
H = -1185.546566  
G = -1185.599899  
G(quasi-RRHO) = -1185.598839

|    |          |          |          |
|----|----------|----------|----------|
| Si | 1.23153  | 0.35458  | -0.05531 |
| O  | 2.51757  | 0.51158  | -1.05187 |
| H  | 2.82752  | -0.41868 | -1.11473 |
| O  | 1.41666  | -0.19728 | 1.49127  |
| O  | 2.23684  | -1.84803 | -0.21493 |
| H  | 1.63546  | -2.47988 | -0.61225 |
| H  | 1.79153  | -1.09216 | 1.30947  |
| O  | 0.71746  | 1.93137  | 0.18684  |
| H  | 1.25886  | 2.47203  | 0.76445  |
| Si | -1.61526 | -0.14827 | -0.07214 |
| O  | -2.11762 | 1.40951  | -0.12495 |
| H  | -1.37260 | 2.01860  | -0.02382 |
| O  | -1.52624 | -0.74364 | 1.44888  |
| O  | -2.72962 | -1.06334 | -0.82651 |
| H  | -3.16126 | -0.68469 | -1.59462 |
| O  | -0.13693 | -0.25008 | -0.75394 |
| H  | -0.63215 | -0.70430 | 1.81747  |

05\_k6.mol2

E = -1185.665200  
H = -1185.544052  
G = -1185.597390  
G(quasi-RRHO) = -1185.596271

|    |          |          |          |
|----|----------|----------|----------|
| Si | 1.27950  | 0.35173  | -0.04543 |
| O  | 2.61619  | 0.39239  | -0.99043 |
| H  | 2.84294  | -0.55844 | -1.05203 |
| O  | 1.34086  | -0.19527 | 1.51970  |
| O  | 2.02367  | -1.90697 | -0.18044 |
| H  | 1.35888  | -2.44360 | -0.61491 |
| H  | 1.61932  | -1.12624 | 1.36692  |
| O  | 1.02264  | 1.98744  | 0.15572  |
| H  | 0.09487  | 2.23717  | 0.19201  |
| Si | -1.59661 | -0.12746 | -0.08926 |
| O  | -1.99636 | 1.46780  | -0.04736 |
| H  | -2.78021 | 1.72341  | 0.44370  |
| O  | -1.54937 | -0.79334 | 1.40053  |
| O  | -2.69494 | -1.00818 | -0.90679 |



|   |          |          |          |
|---|----------|----------|----------|
| H | -3.09099 | -0.61458 | -1.68646 |
| O | -0.12846 | -0.15131 | -0.77332 |
| H | -0.67906 | -0.69801 | 1.81560  |

*06\_k7.mol2*

E = -1185.662656  
H = -1185.541720  
G = -1185.596239  
G(quasi-RRHO) = -1185.594649

|    |          |          |          |
|----|----------|----------|----------|
| Si | 1.62459  | -0.12144 | -0.09833 |
| O  | 2.77566  | -0.78823 | -1.03503 |
| H  | 2.87617  | -1.74120 | -0.99612 |
| O  | 1.61605  | -0.89365 | 1.34795  |
| O  | 2.05091  | 1.45243  | 0.02637  |
| H  | 1.27610  | 2.01400  | 0.16845  |
| H  | 0.74879  | -0.88237 | 1.77483  |
| O  | 0.13368  | -0.21513 | -0.74545 |
| Si | -1.24037 | 0.34007  | -0.01339 |
| O  | -2.09342 | -1.90672 | -0.31731 |
| H  | -3.00323 | -2.10322 | -0.07704 |
| O  | -2.49226 | 0.55642  | -1.04608 |
| H  | -2.77408 | -0.35270 | -1.25194 |
| O  | -0.84477 | 1.92260  | 0.37698  |
| H  | -1.21662 | 2.58398  | -0.20927 |
| O  | -1.35035 | -0.29892 | 1.50264  |
| H  | -1.65023 | -1.20978 | 1.27460  |

*07\_k8.mol2*

E = -1185.658453  
H = -1185.539130  
G = -1185.595826  
G(quasi-RRHO) = -1185.593511

|    |          |          |          |
|----|----------|----------|----------|
| Si | -1.30224 | 0.28924  | -0.00643 |
| O  | -0.79556 | 1.87362  | -0.32286 |
| H  | -1.28218 | 2.30279  | -1.02944 |
| O  | -2.26861 | -1.99268 | 0.11618  |
| O  | -2.10759 | 0.46277  | 1.42399  |
| H  | -2.10121 | 1.37250  | 1.73121  |
| H  | -3.00668 | -1.93229 | 0.72575  |
| O  | -2.14774 | -0.08637 | -1.34197 |
| H  | -2.44139 | -1.02170 | -1.00547 |

|    |         |          |          |
|----|---------|----------|----------|
| Si | 1.71684 | -0.14421 | 0.01574  |
| O  | 2.59476 | -0.51780 | 1.34163  |
| H  | 2.52051 | 0.07395  | 2.09226  |
| O  | 1.89340 | 1.42972  | -0.37929 |
| O  | 2.38198 | -1.14493 | -1.09180 |
| H  | 1.95382 | -1.19452 | -1.94824 |
| O  | 0.13997 | -0.46239 | 0.22319  |
| H  | 1.02777 | 1.87334  | -0.44897 |

*08\_k9.mol2*

E = -1185.654639  
H = -1185.534595  
G = -1185.590876  
G(quasi-RRHO) = -1185.588766

|    |          |          |          |
|----|----------|----------|----------|
| Si | 1.33569  | -0.31615 | -0.02712 |
| O  | 0.96574  | -1.91844 | -0.33318 |
| H  | 0.05457  | -2.06413 | -0.60960 |
| O  | 2.12397  | 2.01003  | 0.19738  |
| O  | 2.33934  | -0.50036 | 1.27292  |
| H  | 2.34445  | -1.41284 | 1.57340  |
| H  | 2.92145  | 1.95417  | 0.72723  |
| O  | 1.98394  | 0.21220  | -1.42905 |
| H  | 2.24623  | 1.13383  | -1.09403 |
| Si | -1.69133 | 0.14585  | 0.05698  |
| O  | -2.61574 | 0.20417  | 1.39938  |
| H  | -2.45369 | -0.45623 | 2.07562  |
| O  | -1.79694 | -1.30546 | -0.71105 |
| O  | -2.32232 | 1.36311  | -0.82666 |
| H  | -1.87751 | 1.59277  | -1.64466 |
| O  | -0.12794 | 0.33914  | 0.37686  |
| H  | -2.65710 | -1.59843 | -1.01870 |

TS4, water cleavage from IM2

*00\_m1.mol2*

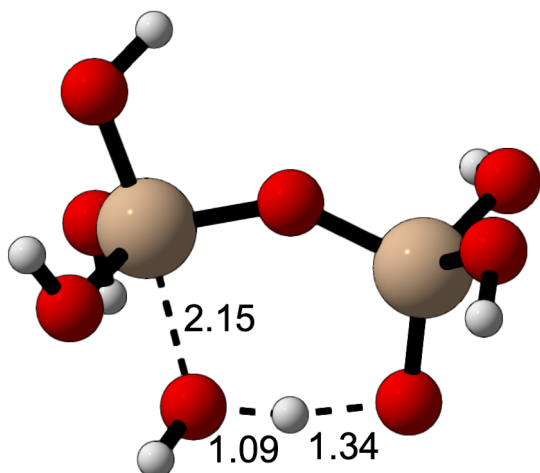

E = -1185.678569  
 H = -1185.558704  
 G = -1185.613199  
 G(quasi-RRHO) = -1185.611451

|    |          |          |          |
|----|----------|----------|----------|
| Si | 1.41920  | -0.19272 | -0.01738 |
| O  | 2.09041  | 0.21482  | -1.47767 |
| H  | 1.89396  | 1.12707  | -1.70242 |
| O  | 2.10033  | -1.73988 | 0.10988  |
| O  | 0.74916  | 1.85061  | -0.09002 |
| H  | 1.07967  | 2.25477  | 0.71635  |
| H  | 1.50699  | -2.43773 | -0.16843 |
| O  | -0.16227 | -0.63562 | -0.02374 |
| O  | 2.11138  | 0.40325  | 1.37712  |
| Si | -1.69637 | -0.03315 | 0.00173  |
| O  | -2.48616 | -0.67133 | 1.30803  |
| O  | -1.65715 | 1.54858  | -0.03754 |
| H  | -0.34354 | 1.82693  | -0.04967 |
| O  | -2.52463 | -0.78513 | -1.21748 |
| H  | -2.15555 | -0.67534 | -2.09515 |
| H  | -2.46080 | -0.12491 | 2.09482  |
| H  | 2.59101  | -0.29113 | 1.83494  |

*01\_m2.mol2*

E = -1185.674782  
 H = -1185.553366  
 G = -1185.609160  
 G(quasi-RRHO) = -1185.607322

|    |          |          |          |
|----|----------|----------|----------|
| Si | -1.41592 | -0.21633 | -0.02309 |
|----|----------|----------|----------|

|    |          |          |          |
|----|----------|----------|----------|
| O  | -1.73132 | 0.12400  | 1.56136  |
| H  | -2.10230 | -0.64370 | 2.00321  |
| O  | -2.08708 | -1.75350 | -0.16571 |
| O  | -0.71216 | 2.05167  | 0.14901  |
| H  | -0.92220 | 2.38710  | -0.72586 |
| H  | -1.44258 | -2.44795 | -0.30723 |
| O  | 0.13468  | -0.49498 | -0.41942 |
| O  | -2.33870 | 0.58363  | -1.13888 |
| Si | 1.68038  | -0.03360 | -0.03323 |
| O  | 2.60567  | -0.58819 | -1.29373 |
| O  | 1.76185  | 1.50111  | 0.29571  |
| H  | 0.30215  | 1.95601  | 0.19959  |
| O  | 2.20315  | -1.03665 | 1.18121  |
| H  | 2.28495  | -0.60311 | 2.03175  |
| H  | 2.39130  | -0.21765 | -2.15122 |
| H  | -2.90241 | -0.02843 | -1.61824 |

*02\_m3.mol2*

E = -1185.674793

H = -1185.553389

G = -1185.608957

G(quasi-RRHO) = -1185.607094

|    |          |          |          |
|----|----------|----------|----------|
| Si | -1.41941 | -0.21818 | -0.02802 |
| O  | -1.78684 | 0.10358  | 1.54852  |
| H  | -2.16864 | -0.67040 | 1.96977  |
| O  | -2.08984 | -1.75115 | -0.20878 |
| O  | -0.71088 | 2.05191  | 0.19476  |
| H  | -0.93269 | 2.40223  | -0.67132 |
| H  | -1.44625 | -2.44057 | -0.37641 |
| O  | 0.14077  | -0.49826 | -0.38174 |
| O  | -2.30335 | 0.60410  | -1.15918 |
| Si | 1.68587  | -0.01877 | -0.01435 |
| O  | 2.60843  | -0.56599 | -1.28394 |
| O  | 1.76883  | 1.51552  | 0.30269  |
| H  | 0.30409  | 1.96135  | 0.23205  |
| O  | 2.21198  | -0.94892 | 1.25242  |
| H  | 2.20519  | -1.89645 | 1.10615  |
| H  | 2.45391  | -0.12891 | -2.12304 |
| H  | -2.85906 | 0.00383  | -1.66218 |

PC, product complexes

*00\_q1.mol2*

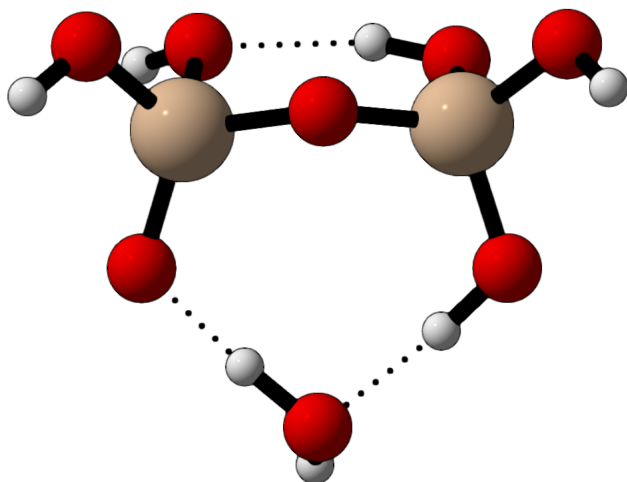

E = -1185.700264  
H = -1185.577924  
G = -1185.633606  
G(quasi-RRHO) = -1185.632039

|    |          |          |          |
|----|----------|----------|----------|
| Si | 1.49734  | -0.30198 | -0.06349 |
| O  | 1.96516  | 1.25177  | -0.14341 |
| H  | 1.24753  | 1.92739  | -0.06321 |
| O  | 2.62716  | -1.18999 | -0.84720 |
| O  | -0.09828 | 2.95533  | 0.01340  |
| H  | -0.14285 | 3.45041  | 0.83468  |
| H  | 3.04901  | -0.77225 | -1.60005 |
| O  | 0.01965  | -0.50218 | -0.71703 |
| O  | 1.45942  | -0.89337 | 1.46341  |
| Si | -1.50299 | -0.28428 | -0.10061 |
| O  | -1.34789 | -1.08110 | 1.36517  |
| O  | -1.96779 | 1.20883  | -0.00488 |
| H  | -0.87444 | 2.29318  | 0.02885  |
| O  | -2.48866 | -1.24878 | -1.01812 |
| H  | -3.10206 | -0.76432 | -1.57279 |
| H  | -2.00013 | -0.84837 | 2.02861  |
| H  | 0.55194  | -1.08233 | 1.75049  |

*01\_p2.mol2*

E = -1185.698277  
H = -1185.575784  
G = -1185.633117

G(quasi-RRHO) = -1185.630731

|    |          |          |          |
|----|----------|----------|----------|
| Si | -1.07114 | 0.70370  | 0.03861  |
| O  | -1.27561 | -0.31928 | -1.15494 |
| O  | -2.07315 | 0.36479  | 1.31020  |
| O  | -1.26624 | 2.31207  | -0.29466 |
| H  | -2.16230 | 2.58671  | -0.49652 |
| H  | -2.54346 | -0.47083 | 1.16842  |
| Si | 1.74548  | -0.22098 | 0.03071  |
| O  | 1.21374  | -1.10684 | -1.22491 |
| H  | 0.23448  | -0.93297 | -1.36103 |
| O  | 2.39916  | -1.12629 | 1.22864  |
| O  | 3.02922  | 0.71368  | -0.36839 |
| H  | 2.93527  | 1.26081  | -1.14999 |
| O  | 0.49597  | 0.66881  | 0.58357  |
| H  | 1.81531  | -1.74882 | 1.66541  |
| H  | -3.82967 | -1.97892 | -0.45997 |
| O  | -2.96420 | -2.01081 | -0.04607 |
| H  | -2.36148 | -1.44304 | -0.60431 |

*02\_p1.mol2*

E = -1185.698297

H = -1185.575800

G = -1185.633080

G(quasi-RRHO) = -1185.630723

|    |          |          |          |
|----|----------|----------|----------|
| Si | -1.07706 | 0.70582  | 0.03805  |
| O  | -1.27619 | -0.30698 | -1.16510 |
| O  | -2.08521 | 0.35723  | 1.30213  |
| O  | -1.27178 | 2.31675  | -0.28190 |
| H  | -2.16657 | 2.59202  | -0.48855 |
| H  | -2.54278 | -0.48528 | 1.15949  |
| Si | 1.74070  | -0.21627 | 0.03274  |
| O  | 1.21259  | -1.09802 | -1.22737 |
| H  | 0.23427  | -0.92168 | -1.36739 |
| O  | 2.39578  | -1.12487 | 1.22742  |
| O  | 3.02221  | 0.72347  | -0.36156 |
| H  | 2.93000  | 1.26803  | -1.14516 |
| O  | 0.48803  | 0.66688  | 0.58896  |
| H  | 1.81084  | -1.74350 | 1.66821  |
| H  | -2.36727 | -1.43318 | -0.62739 |
| O  | -3.05061 | -1.94910 | -0.11340 |
| H  | -2.66793 | -2.81296 | 0.05621  |

03\_p3.mol2

E = -1185.698187  
H = -1185.575729  
G = -1185.633007  
G(quasi-RRHO) = -1185.630702

|    |          |          |          |
|----|----------|----------|----------|
| Si | -1.07708 | 0.70370  | 0.04025  |
| O  | -1.26451 | -0.31629 | -1.15867 |
| O  | -2.04046 | 0.34533  | 1.33072  |
| O  | -1.43812 | 2.29138  | -0.25012 |
| H  | -0.84435 | 2.75286  | -0.84462 |
| H  | -2.54134 | -0.46909 | 1.17242  |
| Si | 1.74663  | -0.22423 | 0.03081  |
| O  | 1.21019  | -1.12980 | -1.20824 |
| H  | 0.23189  | -0.94623 | -1.34767 |
| O  | 2.38492  | -1.11182 | 1.25066  |
| O  | 3.04319  | 0.68747  | -0.38090 |
| H  | 2.96248  | 1.21320  | -1.17846 |
| O  | 0.50558  | 0.69399  | 0.55665  |
| H  | 1.79224  | -1.71925 | 1.69668  |
| H  | -3.85714 | -1.93236 | -0.47950 |
| O  | -2.99314 | -1.98340 | -0.06435 |
| H  | -2.37866 | -1.42670 | -0.61946 |

04\_p4.mol2

E = -1185.698159  
H = -1185.575694  
G = -1185.632932  
G(quasi-RRHO) = -1185.630657

|    |          |          |          |
|----|----------|----------|----------|
| Si | -1.08357 | 0.70760  | 0.03916  |
| O  | -1.26532 | -0.30174 | -1.16963 |
| H  | -2.37919 | -1.41951 | -0.64202 |
| O  | -2.05649 | 0.34064  | 1.32001  |
| O  | -1.44062 | 2.29825  | -0.23860 |
| H  | -0.84080 | 2.76520  | -0.82266 |
| H  | -2.54144 | -0.48322 | 1.16080  |
| O  | -3.07062 | -1.92583 | -0.13094 |
| H  | -2.70113 | -2.79574 | 0.03720  |
| Si | 1.74064  | -0.22006 | 0.03340  |
| O  | 1.20815  | -1.11851 | -1.21259 |
| H  | 0.23098  | -0.93173 | -1.35582 |
| O  | 2.37896  | -1.11377 | 1.24875  |
| O  | 3.03581  | 0.69676  | -0.37131 |

|   |         |          |          |
|---|---------|----------|----------|
| H | 2.95842 | 1.21942  | -1.17122 |
| O | 0.49647 | 0.69100  | 0.56402  |
| H | 1.78336 | -1.71430 | 1.70018  |

*05\_p6.mol2*

E = -1185.698134  
H = -1185.575686  
G = -1185.632590  
G(quasi-RRHO) = -1185.630474

|    |          |          |          |
|----|----------|----------|----------|
| Si | -1.06690 | 0.70239  | 0.02881  |
| O  | -1.27747 | -0.34550 | -1.14183 |
| O  | -2.08055 | 0.40630  | 1.30178  |
| O  | -1.23856 | 2.30506  | -0.34251 |
| H  | -2.12936 | 2.58671  | -0.55760 |
| H  | -2.56270 | -0.42500 | 1.17519  |
| Si | 1.74258  | -0.22954 | 0.02232  |
| O  | 1.20090  | -1.17676 | -1.17878 |
| H  | 0.22472  | -0.99492 | -1.32357 |
| O  | 2.43681  | -1.05958 | 1.25551  |
| O  | 2.94912  | 0.69686  | -0.58258 |
| H  | 3.53264  | 1.11937  | 0.05026  |
| O  | 0.49626  | 0.65756  | 0.58534  |
| H  | 1.84839  | -1.52618 | 1.85209  |
| H  | -3.86395 | -1.94365 | -0.43076 |
| O  | -3.00204 | -1.98368 | -0.01019 |
| H  | -2.38497 | -1.43840 | -0.57532 |

*06\_p5.mol2*

E = -1185.698200  
H = -1185.575736  
G = -1185.632389  
G(quasi-RRHO) = -1185.630398

|    |          |          |          |
|----|----------|----------|----------|
| Si | -1.07860 | 0.70535  | 0.03334  |
| O  | -2.07082 | 0.36553  | 1.31227  |
| H  | -2.52615 | -0.48039 | 1.18341  |
| O  | -1.28208 | -0.32466 | -1.15433 |
| O  | -3.04408 | -1.95940 | -0.07078 |
| H  | -2.65519 | -2.81858 | 0.10826  |
| H  | -2.36636 | -1.44640 | -0.59510 |
| O  | -1.28923 | 2.31072  | -0.30468 |
| H  | -2.18912 | 2.57732  | -0.50013 |



|    |         |          |          |
|----|---------|----------|----------|
| Si | 1.73304 | -0.22099 | 0.02125  |
| O  | 3.00842 | 0.74032  | -0.35398 |
| H  | 2.82773 | 1.50992  | -0.89720 |
| O  | 1.20787 | -1.11650 | -1.22603 |
| O  | 2.30714 | -1.24253 | 1.16427  |
| H  | 2.87122 | -0.86632 | 1.84231  |
| O  | 0.49362 | 0.68737  | 0.56539  |
| H  | 0.22887 | -0.94351 | -1.36289 |

*07\_p7.mol2*

E = -1185.698068  
H = -1185.575604  
G = -1185.632379  
G(quasi-RRHO) = -1185.630338

|    |          |          |          |
|----|----------|----------|----------|
| Si | 1.08380  | 0.70282  | 0.03347  |
| O  | 1.27188  | -0.31746 | -1.16488 |
| H  | 2.34720  | -1.45476 | -0.62107 |
| O  | 1.29427  | 2.31041  | -0.29273 |
| O  | 2.08909  | 0.35006  | 1.29848  |
| H  | 2.53462  | -0.49976 | 1.16170  |
| H  | 2.19246  | 2.57714  | -0.49574 |
| O  | 3.02339  | -1.97817 | -0.10502 |
| H  | 2.62582  | -2.83352 | 0.07337  |
| Si | -1.72917 | -0.20557 | 0.03933  |
| O  | -2.20964 | -1.12969 | 1.30330  |
| H  | -3.07394 | -1.54011 | 1.24149  |
| O  | -1.23552 | -1.05344 | -1.25771 |
| O  | -3.03934 | 0.70612  | -0.33911 |
| H  | -3.03669 | 1.12055  | -1.20413 |
| O  | -0.48200 | 0.68417  | 0.58427  |
| H  | -0.25146 | -0.90697 | -1.38767 |

*08\_p8.mol2*

E = -1185.697998  
H = -1185.575532  
G = -1185.632316  
G(quasi-RRHO) = -1185.630277

|    |          |          |          |
|----|----------|----------|----------|
| Si | -1.07568 | 0.69957  | 0.03401  |
| O  | -1.27057 | -0.33492 | -1.15106 |
| O  | -2.07486 | 0.36197  | 1.30801  |
| O  | -1.28441 | 2.30357  | -0.31150 |

|    |          |          |          |
|----|----------|----------|----------|
| H  | -2.18369 | 2.57018  | -0.50969 |
| H  | -2.53905 | -0.47799 | 1.17190  |
| Si | 1.73599  | -0.21202 | 0.03762  |
| O  | 1.23607  | -1.07273 | -1.24853 |
| H  | 0.25112  | -0.92863 | -1.37434 |
| O  | 2.22125  | -1.12288 | 1.30923  |
| O  | 3.04536  | 0.69428  | -0.35652 |
| H  | 3.03881  | 1.09994  | -1.22565 |
| O  | 0.49207  | 0.68470  | 0.57895  |
| H  | 3.08244  | -1.53948 | 1.24571  |
| H  | -3.82024 | -1.99518 | -0.45119 |
| O  | -2.95508 | -2.02591 | -0.03654 |
| H  | -2.35226 | -1.45924 | -0.59591 |

*09\_p10.mol2*

E = -1185.686673  
H = -1185.564560  
G = -1185.627675  
G(quasi-RRHO) = -1185.623206

|    |          |          |          |
|----|----------|----------|----------|
| Si | 1.09599  | -0.67784 | -0.04488 |
| O  | 0.48024  | -1.94243 | -0.92860 |
| H  | -0.42496 | -1.80229 | -1.23027 |
| O  | 3.90412  | 1.93987  | 0.04281  |
| O  | 1.76411  | -1.36314 | 1.31235  |
| H  | 1.20390  | -1.99290 | 1.76941  |
| H  | 4.59032  | 1.44624  | 0.49578  |
| O  | 2.13485  | 0.22589  | -0.78011 |
| H  | 3.22442  | 1.25918  | -0.24799 |
| Si | -1.78310 | 0.40171  | 0.07603  |
| O  | -2.81483 | 0.27151  | 1.33403  |
| H  | -2.82636 | -0.56136 | 1.80913  |
| O  | -2.08691 | -0.71451 | -1.09625 |
| O  | -2.08557 | 1.92435  | -0.42822 |
| H  | -1.53796 | 2.27157  | -1.13472 |
| O  | -0.25311 | 0.15426  | 0.49542  |
| H  | -2.95291 | -0.72111 | -1.50878 |

*10\_p9.mol2*

E = -1185.693182  
H = -1185.570164  
G = -1185.625701  
G(quasi-RRHO) = -1185.624109

|    |          |          |          |
|----|----------|----------|----------|
| Si | -1.02686 | 0.52005  | -0.17706 |
| O  | -2.27229 | 0.59948  | -1.11631 |
| O  | -1.25604 | -0.54575 | 1.09344  |
| O  | -0.48131 | 1.93630  | 0.52075  |
| H  | -1.10915 | 2.41183  | 1.06767  |
| H  | -2.09860 | -1.01786 | 0.99864  |
| Si | 1.78063  | -0.25992 | -0.07955 |
| O  | 2.98296  | -0.80680 | -1.03282 |
| H  | 2.99070  | -1.74557 | -1.22846 |
| O  | 1.48257  | -1.36987 | 1.08803  |
| O  | 2.34306  | 1.15897  | 0.51064  |
| H  | 1.62247  | 1.77867  | 0.68902  |
| O  | 0.39172  | 0.01680  | -0.88247 |
| H  | 0.54320  | -1.38753 | 1.33222  |
| H  | -4.55912 | -0.90248 | 0.33748  |
| O  | -3.76883 | -1.27160 | -0.06306 |
| H  | -3.31691 | -0.51913 | -0.54956 |

One H<sub>2</sub>O

RC-w, Reactant Complexes

*00\_sw-c1.mol2*

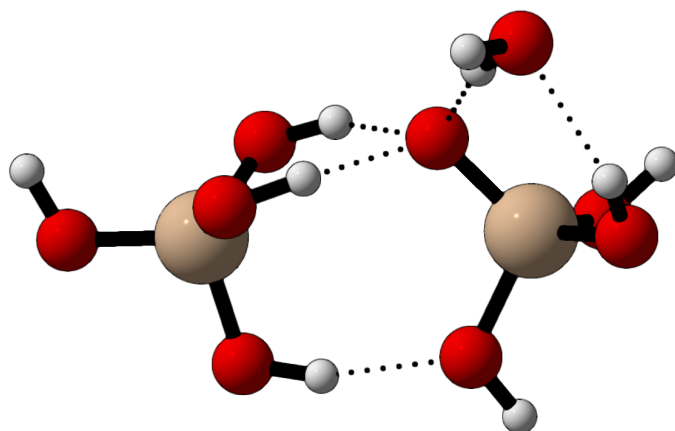

E = -1262.149718  
H = -1261.999287  
G = -1262.062053  
G(quasi-RRHO) = -1262.059311

|    |          |          |          |
|----|----------|----------|----------|
| Si | -1.68808 | -0.56907 | 0.03636  |
| O  | -0.77038 | -1.47668 | -1.02064 |
| H  | -1.16007 | -2.30573 | -1.30737 |

|    |          |          |          |
|----|----------|----------|----------|
| O  | -0.82603 | 0.64228  | 0.58090  |
| O  | -3.05701 | -0.04914 | -0.72833 |
| H  | -3.12213 | 0.91815  | -0.72972 |
| H  | 0.51879  | 1.32369  | -0.43555 |
| O  | -2.16569 | -1.70436 | 1.14139  |
| H  | -2.91956 | -1.46787 | 1.68455  |
| Si | 2.21674  | 0.09145  | 0.00516  |
| O  | 3.83451  | 0.31272  | 0.02709  |
| H  | 4.16437  | 1.05837  | 0.53140  |
| O  | 2.04223  | -1.30120 | -0.83432 |
| O  | 1.62080  | -0.02020 | 1.52672  |
| H  | 0.66149  | 0.20048  | 1.48379  |
| O  | 1.45361  | 1.33693  | -0.73856 |
| H  | 1.10577  | -1.51342 | -0.99380 |
| O  | -2.48258 | 2.65574  | -0.01120 |
| H  | -1.76318 | 2.03609  | 0.27412  |
| H  | -2.08241 | 3.26822  | -0.63298 |

*01\_sw-c2.mol2*

E = -1262.149605  
H = -1261.999143  
G = -1262.061614  
G(quasi-RRHO) = -1262.058932

|    |          |          |          |
|----|----------|----------|----------|
| Si | 1.69820  | -0.56601 | 0.03650  |
| O  | 0.74582  | -1.55362 | -0.91943 |
| H  | 1.14250  | -2.38444 | -1.19092 |
| O  | 0.82188  | 0.63817  | 0.57297  |
| O  | 2.38798  | -1.54564 | 1.17924  |
| H  | 1.78001  | -2.01390 | 1.75429  |
| H  | -0.66887 | 0.23731  | 1.47568  |
| O  | 2.98884  | -0.06460 | -0.85726 |
| H  | 3.10073  | 0.89693  | -0.81114 |
| Si | -2.22348 | 0.09819  | 0.00021  |
| O  | -3.83926 | 0.33503  | 0.01106  |
| H  | -4.16156 | 1.11144  | 0.47195  |
| O  | -2.06096 | -1.32155 | -0.79508 |
| O  | -1.44895 | 1.31494  | -0.77842 |
| H  | -0.51548 | 1.30730  | -0.47179 |
| O  | -1.63027 | 0.02611  | 1.52527  |
| H  | -1.12566 | -1.55581 | -0.92923 |
| O  | 2.42637  | 2.65556  | -0.14492 |
| H  | 1.76645  | 2.03023  | 0.24864  |
| H  | 2.90422  | 3.04530  | 0.59104  |

*02\_sw-c6.mol2*

E = -1262.144208

H = -1261.994386

G = -1262.061077

G(quasi-RRHO) = -1262.057055

|    |          |          |          |
|----|----------|----------|----------|
| Si | 2.14303  | 0.12936  | -0.07604 |
| O  | 1.46647  | -0.26866 | 1.40019  |
| H  | 2.05688  | -0.24931 | 2.15638  |
| O  | 1.02252  | 0.11284  | -1.17954 |
| O  | 2.93432  | 1.57860  | 0.08060  |
| H  | 2.40843  | 2.35274  | -0.12829 |
| H  | -0.46907 | 0.76296  | -0.85439 |
| O  | 3.36861  | -0.97136 | -0.22612 |
| H  | 3.98508  | -0.81863 | -0.94437 |
| Si | -1.70321 | -0.77468 | -0.00661 |
| O  | -3.29893 | -1.11487 | 0.01913  |
| H  | -3.76106 | -1.10551 | -0.82082 |
| O  | -1.25366 | -0.95649 | 1.55346  |
| O  | -0.89161 | -1.78059 | -1.01083 |
| H  | -0.05777 | -1.31785 | -1.26405 |
| O  | -1.42035 | 0.75448  | -0.54003 |
| H  | -0.31079 | -0.75023 | 1.68539  |
| O  | -2.52578 | 3.19179  | 0.15504  |
| H  | -2.14894 | 2.32872  | -0.10345 |
| H  | -3.07299 | 3.46568  | -0.58441 |

*03\_sw-c3.mol2*

E = -1262.148614

H = -1261.998154

G = -1262.060684

G(quasi-RRHO) = -1262.058057

|    |          |          |          |
|----|----------|----------|----------|
| Si | -2.22408 | -0.24481 | 0.01787  |
| O  | -1.89543 | 1.28917  | -0.55262 |
| H  | -2.65300 | 1.79670  | -0.85173 |
| O  | -0.89898 | -0.92975 | 0.51411  |
| O  | -3.40151 | -0.13373 | 1.18138  |
| H  | -3.07567 | -0.08759 | 2.08196  |
| H  | 0.41529  | -0.21694 | 1.18418  |
| O  | -2.99981 | -0.94759 | -1.26330 |
| H  | -3.42591 | -1.78803 | -1.08653 |

|    |          |          |          |
|----|----------|----------|----------|
| Si | 2.22216  | -0.31507 | -0.02141 |
| O  | 3.68713  | -0.94400 | 0.35366  |
| H  | 3.68995  | -1.84549 | 0.68054  |
| O  | 2.61755  | 1.00749  | -0.89946 |
| O  | 1.32556  | -1.41199 | -0.83220 |
| H  | 0.39216  | -1.37904 | -0.49132 |
| O  | 1.34658  | 0.13850  | 1.29101  |
| H  | 1.94527  | 1.70768  | -0.83181 |
| O  | 0.50888  | 2.60556  | 0.05799  |
| H  | -0.34726 | 2.23786  | -0.22948 |
| H  | 0.76625  | 2.02380  | 0.78922  |

*04\_sw-c4.mol2*

E = -1262.148760  
H = -1261.998366  
G = -1262.059504  
G(quasi-RRHO) = -1262.057458

|    |          |          |          |
|----|----------|----------|----------|
| Si | 1.89129  | -0.34136 | -0.08413 |
| O  | 1.20531  | -0.77924 | 1.38200  |
| H  | 1.75724  | -0.63019 | 2.15315  |
| O  | 0.82551  | -0.56348 | -1.22631 |
| O  | 2.44585  | 1.20613  | 0.05359  |
| H  | 1.75359  | 1.89191  | 0.04553  |
| H  | -0.39291 | 0.48922  | -1.18618 |
| O  | 3.25534  | -1.27505 | -0.15785 |
| H  | 3.82815  | -1.12528 | -0.91181 |
| Si | -1.99217 | -0.27259 | 0.00463  |
| O  | -3.61064 | -0.07358 | 0.05282  |
| H  | -4.06884 | -0.01431 | -0.78728 |
| O  | -1.55578 | -0.21196 | 1.57811  |
| O  | -1.57430 | -1.69711 | -0.68690 |
| H  | -0.64121 | -1.60587 | -0.98998 |
| O  | -1.26143 | 0.90718  | -0.87924 |
| H  | -0.60820 | -0.40418 | 1.69870  |
| O  | 0.26187  | 2.97683  | 0.11042  |
| H  | -0.41682 | 2.35593  | -0.22422 |
| H  | 0.26755  | 3.72036  | -0.49802 |

*05\_sw-c5.mol2*

E = -1262.146175  
H = -1261.995816  
G = -1262.058922

G(quasi-RRHO) = -1262.056066

|    |          |          |          |
|----|----------|----------|----------|
| Si | -2.27549 | 0.26896  | 0.04191  |
| O  | -1.79294 | -1.04627 | -0.87081 |
| H  | -2.47972 | -1.48742 | -1.37515 |
| O  | -1.02415 | 0.88382  | 0.76837  |
| O  | -3.08641 | 1.32782  | -0.94529 |
| H  | -2.54418 | 2.01900  | -1.32951 |
| H  | 0.42613  | 1.18868  | -0.06685 |
| O  | -3.46926 | -0.36945 | 0.99352  |
| H  | -3.99484 | 0.26267  | 1.48686  |
| Si | 1.57990  | -0.62562 | 0.02950  |
| O  | 3.18347  | -0.91292 | 0.03587  |
| H  | 3.71709  | -0.10304 | 0.09543  |
| O  | 0.93863  | -1.68835 | -1.03553 |
| O  | 0.91612  | -0.81607 | 1.51469  |
| H  | 0.09811  | -0.26220 | 1.52918  |
| O  | 1.32340  | 0.94034  | -0.42163 |
| H  | -0.03272 | -1.62554 | -1.07299 |
| O  | 3.91128  | 1.80749  | 0.04099  |
| H  | 4.38141  | 2.17709  | -0.71099 |
| H  | 2.96588  | 1.81277  | -0.19726 |

TS1-w, Si-O bond association

[00\\_sw-d2.mol2](#)

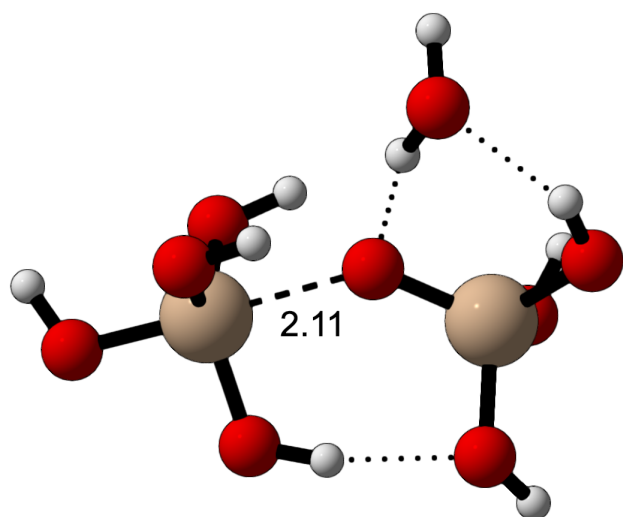

|   |                |
|---|----------------|
| E | = -1262.137985 |
| H | = -1261.987723 |
| G | = -1262.048927 |

G(quasi-RRHO) = -1262.046303

|    |          |          |          |
|----|----------|----------|----------|
| Si | 1.75405  | -0.05176 | 0.00538  |
| O  | 1.37265  | -1.43935 | -0.81021 |
| H  | 0.44862  | -1.54584 | -1.06543 |
| O  | 1.83612  | 1.36872  | -0.86386 |
| O  | 1.63168  | 0.04693  | 1.66719  |
| H  | 0.73098  | 0.27450  | 1.90936  |
| H  | 0.96772  | 1.74491  | -1.01624 |
| O  | 3.41883  | -0.38693 | -0.00784 |
| H  | 3.90925  | 0.15551  | 0.61037  |
| Si | -1.64698 | -0.46446 | 0.00771  |
| O  | -2.00997 | -1.41797 | 1.30315  |
| H  | -2.48521 | -0.99788 | 2.02213  |
| O  | -1.45643 | -1.55732 | -1.22231 |
| O  | -2.94035 | 0.51563  | -0.25481 |
| H  | -2.70303 | 1.45368  | -0.31037 |
| O  | -0.30531 | 0.38899  | 0.09666  |
| H  | -1.96494 | -2.36871 | -1.16618 |
| O  | -1.32798 | 2.86268  | -0.14454 |
| H  | -0.82731 | 2.04525  | 0.08393  |
| H  | -1.32895 | 3.41449  | 0.64157  |

*01\_sw-d3.mol2*

E = -1262.136225

H = -1261.986054

G = -1262.047997

G(quasi-RRHO) = -1262.045332

|    |          |          |          |
|----|----------|----------|----------|
| Si | 1.26168  | -0.48901 | 0.03400  |
| O  | 0.49418  | -1.54041 | -0.97379 |
| H  | -0.46161 | -1.42754 | -1.05877 |
| O  | 1.64743  | 1.04906  | -0.50953 |
| O  | 1.07455  | -0.68921 | 1.67170  |
| H  | 0.23359  | -0.29369 | 1.92210  |
| H  | 0.86284  | 1.60078  | -0.41372 |
| O  | 2.79157  | -1.16021 | -0.14194 |
| H  | 3.50690  | -0.53195 | 0.00770  |
| Si | -2.19499 | 0.26779  | 0.00853  |
| O  | -3.11620 | -0.29428 | 1.25880  |
| H  | -3.44786 | 0.36427  | 1.87144  |
| O  | -2.27690 | -0.95406 | -1.11506 |
| O  | -3.01758 | 1.60355  | -0.51636 |
| H  | -2.48853 | 2.24958  | -0.98772 |



|   |          |          |          |
|---|----------|----------|----------|
| O | -0.66770 | 0.53733  | 0.28266  |
| H | -3.10878 | -1.42025 | -1.21236 |
| O | 4.32786  | 1.35694  | -0.10666 |
| H | 4.54339  | 1.79925  | 0.71808  |
| H | 3.36865  | 1.48691  | -0.24072 |

*02\_sw-d\_new-conf-1.mol2*

E = -1262.136225  
H = -1261.986054  
G = -1262.047995  
G(quasi-RRHO) = -1262.045331

|    |          |          |          |
|----|----------|----------|----------|
| Si | 1.26167  | -0.48900 | 0.03400  |
| O  | 0.49418  | -1.54046 | -0.97374 |
| H  | -0.46161 | -1.42759 | -1.05871 |
| O  | 1.64747  | 1.04906  | -0.50955 |
| O  | 1.07449  | -0.68911 | 1.67171  |
| H  | 0.23354  | -0.29354 | 1.92207  |
| H  | 0.86291  | 1.60081  | -0.41375 |
| O  | 2.79156  | -1.16022 | -0.14187 |
| H  | 3.50690  | -0.53198 | 0.00775  |
| Si | -2.19498 | 0.26778  | 0.00851  |
| O  | -3.11609 | -0.29415 | 1.25890  |
| H  | -3.44811 | 0.36451  | 1.87123  |
| O  | -2.27697 | -0.95416 | -1.11499 |
| O  | -3.01761 | 1.60351  | -0.51641 |
| H  | -2.48862 | 2.24947  | -0.98794 |
| O  | -0.66768 | 0.53734  | 0.28249  |
| H  | -3.10884 | -1.42043 | -1.21198 |
| O  | 4.32790  | 1.35690  | -0.10669 |
| H  | 3.36869  | 1.48688  | -0.24074 |
| H  | 4.54343  | 1.79919  | 0.71807  |

*03\_sw-d4.mol2*

E = -1262.136430  
H = -1261.986130  
G = -1262.047825  
G(quasi-RRHO) = -1262.045169

|    |         |          |          |
|----|---------|----------|----------|
| Si | 2.04355 | -0.20127 | 0.01392  |
| O  | 1.20582 | -1.27338 | -0.91589 |
| H  | 0.26299 | -1.09062 | -1.03304 |
| O  | 2.49529 | 1.25982  | -0.63999 |

|    |          |          |          |
|----|----------|----------|----------|
| O  | 1.92300  | -0.28660 | 1.67096  |
| H  | 1.12472  | 0.18369  | 1.93115  |
| H  | 1.73892  | 1.85217  | -0.58040 |
| O  | 3.52010  | -1.00327 | -0.15395 |
| H  | 4.23730  | -0.57932 | 0.31849  |
| Si | -1.36042 | 0.66670  | -0.00923 |
| O  | -2.29910 | 0.11092  | 1.25091  |
| H  | -2.57461 | 0.76068  | 1.90045  |
| O  | -1.52395 | -0.54557 | -1.12475 |
| O  | -2.14437 | 2.03515  | -0.50652 |
| H  | -1.57535 | 2.71898  | -0.86404 |
| O  | 0.16882  | 0.90596  | 0.27614  |
| H  | -2.28560 | -1.13466 | -0.99366 |
| O  | -3.65578 | -1.96908 | 0.00085  |
| H  | -3.44569 | -1.28614 | 0.66087  |
| H  | -4.56507 | -1.81243 | -0.26757 |

*04\_sw-d1.mol2*

E = -1262.138804

H = -1261.988255

G = -1262.047508

G(quasi-RRHO) = -1262.045874

|    |          |          |          |
|----|----------|----------|----------|
| Si | -1.70367 | -0.33431 | -0.00976 |
| O  | -1.10832 | -0.26699 | 1.52022  |
| H  | -0.16903 | -0.47263 | 1.62684  |
| O  | -1.46789 | 0.96859  | -1.03772 |
| O  | -1.88595 | -1.80813 | -0.74052 |
| H  | -1.01929 | -2.07951 | -1.06353 |
| H  | -0.64633 | 0.77060  | -1.50846 |
| O  | -3.29411 | -0.02133 | 0.42522  |
| H  | -3.88025 | 0.10983  | -0.32097 |
| Si | 1.79448  | -0.32545 | -0.06486 |
| O  | 3.09166  | -1.18400 | -0.62099 |
| H  | 3.38091  | -0.98230 | -1.51243 |
| O  | 1.69791  | -0.71872 | 1.55366  |
| O  | 2.23682  | 1.25383  | -0.20758 |
| H  | 1.52206  | 1.90856  | -0.10332 |
| O  | 0.39815  | -0.69887 | -0.70171 |
| H  | 2.32441  | -0.28911 | 2.13895  |
| O  | 0.05773  | 2.98535  | 0.11589  |
| H  | -0.63544 | 2.40428  | -0.25377 |
| H  | 0.04350  | 3.78922  | -0.41037 |

IM1-w, three equatorial OH groups

*00\_sw-e1.mol2*

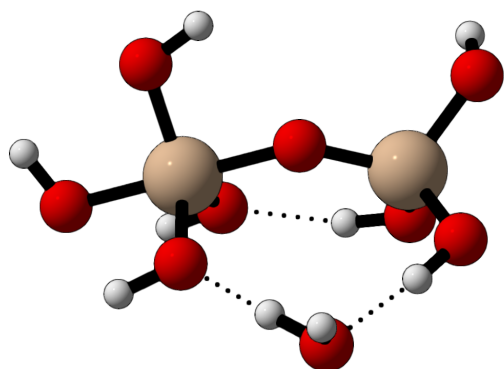

E = -1262.152675  
H = -1262.000889  
G = -1262.060060  
G(quasi-RRHO) = -1262.058045

|    |          |          |          |
|----|----------|----------|----------|
| Si | -1.48373 | -0.18699 | -0.09783 |
| O  | -1.10667 | -1.10146 | 1.28391  |
| H  | -1.90307 | -1.25194 | 1.79749  |
| O  | -1.36557 | 1.50497  | 0.04185  |
| O  | -1.96615 | -0.90340 | -1.54635 |
| H  | -1.20250 | -1.08823 | -2.09603 |
| H  | -2.22104 | 1.85508  | 0.30246  |
| O  | -3.17189 | -0.11142 | 0.41144  |
| H  | -3.75185 | -0.45764 | -0.26695 |
| Si | 1.66858  | -0.43879 | -0.01581 |
| O  | 1.57450  | -1.14459 | 1.46692  |
| H  | 0.63276  | -1.26121 | 1.69469  |
| O  | 2.50213  | 0.96465  | 0.03617  |
| O  | 2.63250  | -1.37953 | -0.96829 |
| H  | 2.47166  | -2.32285 | -0.91184 |
| O  | 0.19418  | -0.25051 | -0.61822 |
| H  | 1.95009  | 1.77321  | 0.05783  |
| O  | 0.78920  | 3.08883  | 0.10061  |
| H  | -0.03475 | 2.54720  | 0.04356  |
| H  | 0.81296  | 3.62707  | -0.69452 |

*01\_sw-e2.mol2*

E = -1262.151079  
H = -1261.999177  
G = -1262.057690

G(quasi-RRHO) = -1262.056008

|    |          |          |          |
|----|----------|----------|----------|
| Si | -0.89630 | -0.61616 | -0.11055 |
| O  | -0.45916 | -0.91009 | 1.50559  |
| H  | -1.24344 | -0.94435 | 2.05718  |
| O  | -0.96953 | 1.00862  | -0.57046 |
| O  | -1.22751 | -1.87373 | -1.18092 |
| H  | -0.42298 | -2.15525 | -1.62060 |
| H  | -1.83156 | 1.42663  | -0.44240 |
| O  | -2.62521 | -0.62261 | 0.34728  |
| H  | -3.06914 | -1.37799 | -0.04128 |
| Si | 1.99099  | 0.26412  | -0.02221 |
| O  | 2.15415  | 0.03449  | 1.60011  |
| H  | 1.32099  | -0.33464 | 1.93998  |
| O  | 1.67398  | 1.82938  | -0.40489 |
| O  | 3.45292  | -0.02706 | -0.70774 |
| H  | 3.95180  | -0.75895 | -0.34093 |
| O  | 0.80648  | -0.67451 | -0.57148 |
| H  | 0.71486  | 1.90692  | -0.55218 |
| O  | -3.72595 | 1.75293  | -0.03435 |
| H  | -3.49432 | 0.82105  | 0.19816  |
| H  | -3.89324 | 2.20590  | 0.79560  |

*02\_sw-e4.mol2*

E = -1262.148928

H = -1261.997002

G = -1262.057234

G(quasi-RRHO) = -1262.054854

|    |          |          |          |
|----|----------|----------|----------|
| Si | 0.90789  | -0.24406 | 0.00350  |
| O  | 0.43665  | -0.57149 | 1.60443  |
| H  | 1.08859  | -1.14112 | 2.01861  |
| O  | 0.34446  | -1.31651 | -1.18844 |
| O  | 1.81921  | 1.14061  | -0.37083 |
| H  | 1.24301  | 1.89221  | -0.52452 |
| H  | 0.99145  | -2.01146 | -1.32813 |
| O  | 2.36972  | -1.18497 | 0.18279  |
| H  | 3.18285  | -0.67202 | 0.18197  |
| Si | -2.08042 | 0.23621  | -0.03951 |
| O  | -2.31833 | -0.26672 | 1.50996  |
| H  | -1.45091 | -0.48107 | 1.89506  |
| O  | -2.40813 | -0.94242 | -1.13586 |
| O  | -3.19810 | 1.39511  | -0.35642 |
| H  | -3.38481 | 2.00649  | 0.35808  |

|   |          |          |          |
|---|----------|----------|----------|
| O | -0.55846 | 0.72529  | -0.20963 |
| H | -1.56426 | -1.34043 | -1.40962 |
| O | 4.48527  | 0.97617  | 0.00723  |
| H | 4.96844  | 0.99436  | -0.82231 |
| H | 3.56276  | 1.22231  | -0.21096 |

*03\_sw-e3.mol2*

E = -1262.149363  
H = -1261.997610  
G = -1262.056992  
G(quasi-RRHO) = -1262.055170

|    |          |          |          |
|----|----------|----------|----------|
| Si | -1.39254 | -0.13598 | -0.00438 |
| O  | -1.01891 | -0.96323 | -1.44262 |
| H  | -1.78414 | -1.47053 | -1.72271 |
| O  | -1.01768 | -0.93782 | 1.44782  |
| O  | -2.03399 | 1.40930  | -0.01729 |
| H  | -1.38944 | 2.12757  | -0.01973 |
| H  | -1.78201 | -1.44166 | 1.73645  |
| O  | -3.00962 | -0.82444 | 0.00104  |
| H  | -3.67449 | -0.13564 | 0.00262  |
| Si | 1.64913  | -0.35277 | 0.01055  |
| O  | 1.70965  | -1.29428 | -1.33446 |
| H  | 0.80272  | -1.39344 | -1.67555 |
| O  | 1.72191  | -1.22368 | 1.39788  |
| O  | 3.00318  | 0.57144  | 0.03762  |
| H  | 3.32022  | 0.88194  | -0.81231 |
| O  | 0.28702  | 0.51773  | -0.01038 |
| H  | 0.81441  | -1.32755 | 1.73417  |
| O  | 0.24774  | 3.21090  | -0.08715 |
| H  | 0.49768  | 3.61166  | 0.74912  |
| H  | 0.48849  | 2.26276  | -0.01821 |

*04\_sw-e\_new-conf-1.mol2*

E = -1262.147381  
H = -1261.995447  
G = -1262.054924  
G(quasi-RRHO) = -1262.052813

|    |         |          |          |
|----|---------|----------|----------|
| Si | 0.93365 | 0.32843  | -0.07841 |
| O  | 0.25508 | 1.88758  | -0.06442 |
| H  | 0.83362 | 2.51782  | 0.36914  |
| O  | 0.74515 | -0.62732 | 1.30967  |

|    |          |          |          |
|----|----------|----------|----------|
| O  | 1.74167  | -0.21943 | -1.45520 |
| H  | 1.11413  | -0.61488 | -2.06435 |
| H  | 1.45376  | -0.47799 | 1.93912  |
| O  | 2.47024  | 0.91262  | 0.59237  |
| H  | 2.95024  | 1.46611  | -0.02737 |
| Si | -2.03400 | -0.23968 | -0.03585 |
| O  | -2.47030 | 1.33859  | 0.13102  |
| H  | -1.66402 | 1.88146  | 0.10156  |
| O  | -2.01585 | -1.03892 | 1.39882  |
| O  | -3.21387 | -0.98925 | -0.89361 |
| H  | -3.59773 | -0.48442 | -1.61262 |
| O  | -0.57794 | -0.31499 | -0.71459 |
| H  | -1.09512 | -1.09198 | 1.70471  |
| O  | 4.09317  | -1.27096 | -0.09299 |
| H  | 3.67100  | -0.52284 | 0.36773  |
| H  | 3.52031  | -1.33923 | -0.86676 |

TS2-cw, water cleavage of IM1, H<sub>2</sub>O acting as catalyst  
*00\_cw-h\_new-conf-1.mol2*

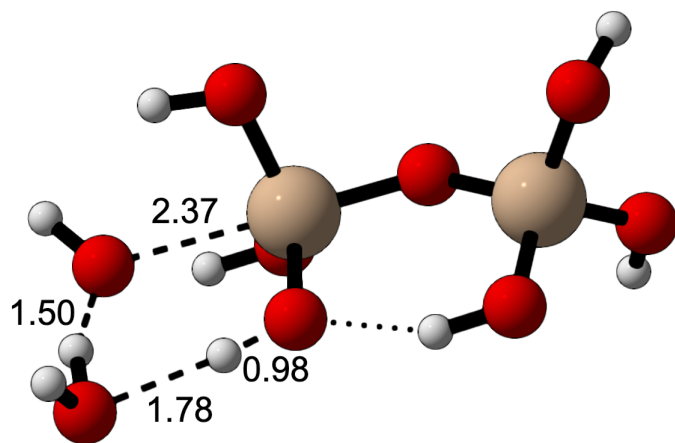

E = -1262.132861  
H = -1261.984592  
G = -1262.045804  
G(quasi-RRHO) = -1262.042879

|    |         |          |          |
|----|---------|----------|----------|
| Si | 0.79223 | -0.62386 | 0.01187  |
| O  | 1.16908 | -1.62874 | -1.23553 |
| H  | 2.13705 | -1.59874 | -1.28669 |
| O  | 0.94474 | 0.99598  | -0.26102 |
| O  | 1.07437 | -1.13140 | 1.55512  |
| H  | 2.01983 | -1.08130 | 1.72517  |

|    |          |          |          |
|----|----------|----------|----------|
| H  | 1.83081  | 1.40759  | -0.20540 |
| O  | 3.16424  | -0.54991 | -0.02498 |
| H  | 3.74551  | -1.20011 | 0.37404  |
| Si | -2.14979 | 0.21658  | -0.00869 |
| O  | -3.24238 | -0.26526 | -1.13257 |
| H  | -2.90079 | -0.50033 | -1.99745 |
| O  | -1.66686 | 1.75729  | -0.23919 |
| O  | -2.96898 | 0.19811  | 1.40823  |
| H  | -3.51116 | -0.57212 | 1.58809  |
| O  | -0.86949 | -0.76633 | -0.02184 |
| H  | -0.69454 | 1.80760  | -0.28709 |
| O  | 3.52877  | 1.92060  | -0.13015 |
| H  | 3.74499  | 2.29697  | 0.72599  |
| H  | 3.56611  | 0.89971  | -0.02580 |

*01\_cw-h\_new-conf-2.mol2*

E = -1262.132690  
H = -1261.984388  
G = -1262.045058  
G(quasi-RRHO) = -1262.042422

|    |          |          |          |
|----|----------|----------|----------|
| Si | 0.79639  | -0.62224 | 0.04424  |
| O  | 1.12452  | -1.59541 | -1.24168 |
| H  | 2.08924  | -1.56018 | -1.33320 |
| O  | 0.93394  | 1.00392  | -0.19654 |
| O  | 1.14134  | -1.16728 | 1.56159  |
| H  | 2.09331  | -1.12221 | 1.69223  |
| H  | 1.82170  | 1.41493  | -0.17986 |
| O  | 3.16372  | -0.53861 | -0.08504 |
| H  | 3.76362  | -1.19782 | 0.26904  |
| Si | -2.14909 | 0.19583  | -0.01452 |
| O  | -2.95090 | -0.23297 | -1.37619 |
| H  | -3.82876 | 0.13197  | -1.50117 |
| O  | -1.67463 | 1.76035  | -0.01328 |
| O  | -3.22268 | -0.03229 | 1.20312  |
| H  | -3.01509 | 0.38190  | 2.04292  |
| O  | -0.86444 | -0.76983 | 0.08313  |
| H  | -0.70664 | 1.82435  | -0.10773 |
| O  | 3.52187  | 1.93309  | -0.17191 |
| H  | 3.77349  | 2.29804  | 0.67948  |
| H  | 3.56497  | 0.91107  | -0.08328 |

TS2-sw, water cleavage of IM1, H<sub>2</sub>O acting as spectator

*00\_sw-h1.mol2*

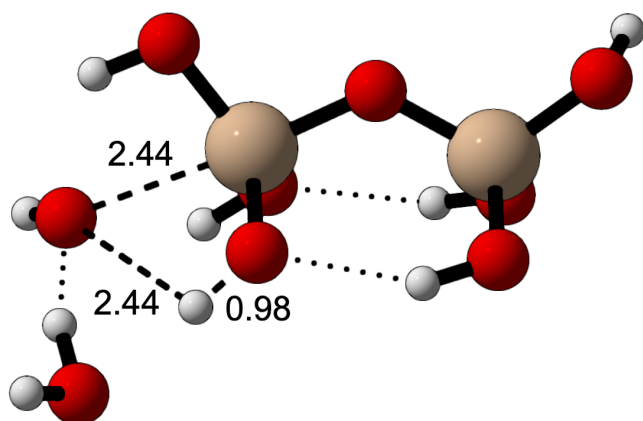

E = -1262.133706  
H = -1261.985439  
G = -1262.044049  
G(quasi-RRHO) = -1262.042106

|    |          |          |          |
|----|----------|----------|----------|
| Si | -0.71188 | -0.58303 | -0.24148 |
| O  | -0.60042 | -0.96820 | 1.36765  |
| H  | -1.46809 | -0.89789 | 1.77820  |
| O  | -0.98150 | 1.01142  | -0.53467 |
| O  | -1.37096 | -1.67124 | -1.27094 |
| H  | -2.31816 | -1.65690 | -1.04132 |
| H  | -1.85220 | 1.39763  | -0.30256 |
| O  | -3.08783 | -0.61363 | 0.31375  |
| H  | -3.52099 | -1.18205 | 0.95347  |
| Si | 2.08804  | 0.20862  | 0.00888  |
| O  | 2.18391  | -0.14451 | 1.60770  |
| H  | 1.34363  | -0.47785 | 1.95277  |
| O  | 1.77701  | 1.78763  | -0.28389 |
| O  | 3.54911  | -0.06226 | -0.66021 |
| H  | 4.04443  | -0.81551 | -0.33327 |
| O  | 0.90021  | -0.68593 | -0.64696 |
| H  | 0.82961  | 1.92968  | -0.43249 |
| O  | -3.46841 | 1.85182  | 0.21832  |
| H  | -4.05200 | 2.07965  | -0.50882 |
| H  | -3.48143 | 0.82427  | 0.30444  |

*01\_sw-h2.mol2*

E = -1262.131704



H = -1261.982842  
G = -1262.042158  
G(quasi-RRHO) = -1262.040193

|    |          |          |          |
|----|----------|----------|----------|
| Si | -1.20964 | -0.29344 | -0.28102 |
| O  | -1.17353 | -1.03673 | 1.19322  |
| H  | -2.09492 | -0.93763 | 1.51364  |
| O  | -1.53094 | 1.32720  | -0.23985 |
| O  | -1.95549 | -1.11846 | -1.48757 |
| H  | -2.90481 | -1.13820 | -1.33689 |
| H  | -2.45142 | 1.34346  | 0.11029  |
| O  | -3.43358 | -0.02331 | 0.68110  |
| H  | -4.29106 | -0.32276 | 0.37526  |
| Si | 1.79810  | -0.37057 | 0.02619  |
| O  | 1.57770  | -1.05122 | 1.49966  |
| H  | 0.63892  | -1.16381 | 1.72129  |
| O  | 2.43423  | 1.12077  | 0.09694  |
| O  | 2.92326  | -1.23249 | -0.79060 |
| H  | 2.87263  | -2.18642 | -0.70766 |
| O  | 0.36863  | -0.34906 | -0.75302 |
| H  | 1.79624  | 1.86587  | 0.09948  |
| O  | 0.52695  | 3.06704  | 0.10772  |
| H  | 0.57794  | 3.67911  | -0.63111 |
| H  | -0.27965 | 2.52647  | -0.03741 |

TS-iso-w, isomerization of IM1 to IM2  
[00\\_sw-f1.mol2](#)

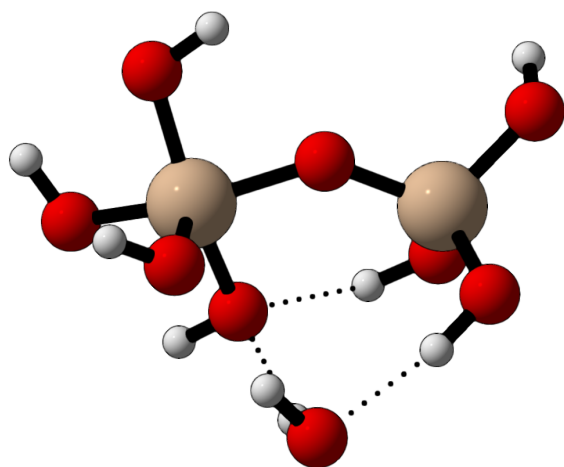

E = -1262.140769  
H = -1261.989891

G = -1262.046722  
G(quasi-RRHO) = -1262.045450

|    |          |          |          |
|----|----------|----------|----------|
| Si | -1.40636 | -0.31883 | -0.02177 |
| O  | -2.84442 | -0.40679 | 0.92877  |
| H  | -3.41891 | -1.10377 | 0.60902  |
| O  | -1.70501 | 0.90501  | -1.15365 |
| O  | -1.92615 | -1.76503 | -0.79778 |
| H  | -1.21600 | -2.13239 | -1.32563 |
| H  | -2.52153 | 0.78794  | -1.64047 |
| O  | -0.74182 | 0.62544  | 1.30305  |
| H  | -1.44173 | 0.81593  | 1.93184  |
| Si | 1.71758  | -0.33072 | 0.00136  |
| O  | 1.82098  | -0.28705 | 1.64372  |
| H  | 0.96037  | 0.01418  | 1.97903  |
| O  | 2.20283  | 1.06897  | -0.69194 |
| O  | 2.84011  | -1.39873 | -0.54001 |
| H  | 2.82816  | -2.26746 | -0.13507 |
| O  | 0.22279  | -0.74084 | -0.43574 |
| H  | 1.53716  | 1.78305  | -0.63923 |
| O  | 0.08168  | 2.80817  | -0.27466 |
| H  | -0.12529 | 2.30896  | 0.53522  |
| H  | -0.56737 | 2.41409  | -0.88313 |

*01\_sw-f3.mol2*

E = -1262.139059  
H = -1261.988433  
G = -1262.046579  
G(quasi-RRHO) = -1262.044786

|    |          |          |          |
|----|----------|----------|----------|
| Si | 0.89836  | 0.32744  | 0.00819  |
| O  | 2.35595  | 1.22008  | -0.17279 |
| H  | 3.15755  | 0.68838  | -0.17393 |
| O  | 0.62638  | 0.30373  | 1.68587  |
| O  | 1.80002  | -1.11587 | -0.32418 |
| H  | 1.20592  | -1.85404 | -0.46968 |
| H  | 1.21562  | -0.29037 | 2.15386  |
| O  | 0.05958  | 1.75642  | -0.47007 |
| H  | 0.65398  | 2.50881  | -0.45463 |
| Si | -2.04466 | -0.27832 | -0.08755 |
| O  | -2.58771 | 1.10112  | -0.79906 |
| H  | -1.82399 | 1.69780  | -0.87891 |
| O  | -2.12851 | -0.21774 | 1.55092  |
| O  | -3.08487 | -1.47167 | -0.51528 |

|   |          |          |          |
|---|----------|----------|----------|
| H | -3.42887 | -1.43302 | -1.40933 |
| O | -0.51791 | -0.56746 | -0.51854 |
| H | -1.23781 | -0.06299 | 1.91233  |
| O | 4.46725  | -0.94286 | -0.39127 |
| H | 3.52270  | -1.21004 | -0.35891 |
| H | 4.86158  | -1.25810 | 0.42538  |

*02\_sw-f2.mol2*

E = -1262.139610  
H = -1261.988896  
G = -1262.046416  
G(quasi-RRHO) = -1262.044689

|    |          |          |          |
|----|----------|----------|----------|
| Si | 0.88800  | -0.62738 | -0.11215 |
| O  | 2.59848  | -0.51951 | -0.40550 |
| H  | 2.96433  | -1.37834 | -0.62311 |
| O  | 0.70881  | -0.83665 | 1.56440  |
| O  | 1.00834  | -2.24867 | -0.68671 |
| H  | 0.13615  | -2.59671 | -0.87680 |
| H  | 0.80481  | -1.75622 | 1.82048  |
| O  | 0.83623  | 1.09554  | -0.18068 |
| H  | 1.68789  | 1.52340  | -0.03798 |
| Si | -1.95139 | 0.28863  | -0.04680 |
| O  | -1.77828 | 1.85619  | -0.50988 |
| H  | -0.82191 | 2.03211  | -0.52894 |
| O  | -1.95971 | 0.10703  | 1.58481  |
| O  | -3.44661 | -0.18104 | -0.52825 |
| H  | -3.75111 | 0.16787  | -1.36768 |
| O  | -0.76731 | -0.62034 | -0.66373 |
| H  | -1.10021 | -0.23895 | 1.88262  |
| O  | 3.71908  | 1.86444  | -0.01906 |
| H  | 3.51082  | 0.91164  | -0.14338 |
| H  | 4.10442  | 1.94173  | 0.85695  |

*03\_sw-f4.mol2*

E = -1262.139621  
H = -1261.988763  
G = -1262.045419  
G(quasi-RRHO) = -1262.044023

|    |         |         |          |
|----|---------|---------|----------|
| Si | 0.95323 | 0.59454 | -0.14714 |
| O  | 2.33631 | 1.62468 | -0.03999 |
| H  | 3.07680 | 1.28744 | -0.54478 |

|    |          |          |          |
|----|----------|----------|----------|
| O  | 1.06143  | -0.35116 | 1.25360  |
| O  | 1.81151  | -0.29104 | -1.37417 |
| H  | 1.19667  | -0.86914 | -1.83143 |
| H  | 1.81416  | -0.95798 | 1.22562  |
| O  | 0.00505  | 1.94524  | 0.34383  |
| H  | 0.57022  | 2.65406  | 0.65665  |
| Si | -1.90687 | -0.30924 | -0.03949 |
| O  | -2.62411 | 1.13807  | 0.26944  |
| H  | -1.91255 | 1.79273  | 0.37546  |
| O  | -1.60253 | -1.16750 | 1.32593  |
| O  | -2.99390 | -1.21358 | -0.86942 |
| H  | -3.53823 | -0.74438 | -1.50400 |
| O  | -0.51785 | -0.08022 | -0.82676 |
| H  | -0.65564 | -1.08701 | 1.54474  |
| O  | 3.35093  | -1.84044 | 0.29463  |
| H  | 2.90953  | -1.39801 | -0.45993 |
| H  | 3.27531  | -2.78433 | 0.13388  |

*04\_sw-f5.mol2*

E = -1262.137411

H = -1261.986765

G = -1262.043778

G(quasi-RRHO) = -1262.042474

|    |          |          |          |
|----|----------|----------|----------|
| Si | -1.39019 | -0.17864 | -0.04795 |
| O  | -2.93803 | -0.66057 | -0.62187 |
| H  | -3.55978 | 0.06503  | -0.54815 |
| O  | -1.28692 | -0.62659 | 1.58869  |
| O  | -1.99565 | 1.42246  | 0.03744  |
| H  | -1.33048 | 2.11397  | 0.10810  |
| H  | -1.61359 | 0.06606  | 2.16654  |
| O  | -0.78552 | -1.64973 | -0.74272 |
| H  | -1.50825 | -2.25230 | -0.92567 |
| Si | 1.60389  | -0.33236 | 0.00713  |
| O  | 1.90842  | -1.48925 | -1.11621 |
| H  | 1.05562  | -1.90128 | -1.33106 |
| O  | 1.49927  | -0.92324 | 1.53125  |
| O  | 2.90919  | 0.65911  | 0.01456  |
| H  | 3.34027  | 0.80347  | -0.82964 |
| O  | 0.23309  | 0.47452  | -0.32988 |
| H  | 0.57062  | -0.92501 | 1.82693  |
| O  | 0.35452  | 3.20606  | -0.17597 |
| H  | 0.50585  | 2.25398  | -0.33924 |
| H  | 0.36083  | 3.62803  | -1.03866 |

IM2-w, co-linear OH groups on Si

*00\_sw-g1.mol2*

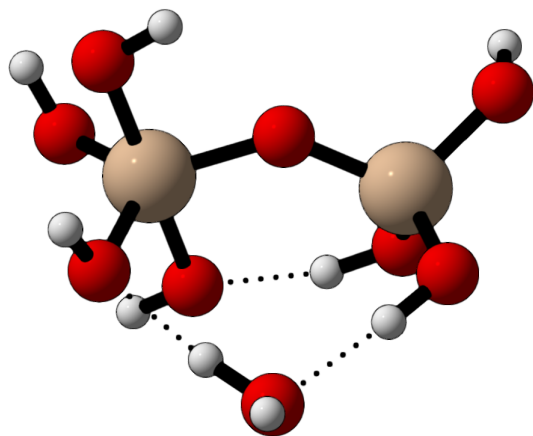

E = -1262.147075

H = -1261.995651

G = -1262.054754

G(quasi-RRHO) = -1262.052975

|    |          |          |          |
|----|----------|----------|----------|
| Si | -1.39383 | -0.31016 | -0.01695 |
| O  | -2.42374 | -1.46891 | 0.65381  |
| H  | -2.94517 | -1.87171 | -0.04387 |
| O  | -1.93229 | 1.30832  | -0.10573 |
| O  | -2.06785 | -0.66552 | -1.61001 |
| H  | -1.37688 | -0.69184 | -2.27200 |
| H  | -2.37987 | 1.43004  | -0.94742 |
| O  | -0.74364 | -0.00659 | 1.59601  |
| H  | -1.42186 | -0.09031 | 2.26734  |
| Si | 1.68527  | -0.35989 | -0.07878 |
| O  | 1.78083  | -0.80577 | 1.49537  |
| H  | 0.89615  | -0.62966 | 1.88086  |
| O  | 2.18509  | 1.16682  | -0.35628 |
| O  | 2.76044  | -1.25983 | -0.93069 |
| H  | 2.79161  | -2.19371 | -0.71659 |
| O  | 0.16788  | -0.57845 | -0.60789 |
| H  | 1.51163  | 1.86474  | -0.21735 |
| O  | 0.19381  | 2.99069  | 0.10358  |
| H  | -0.61865 | 2.43636  | 0.04168  |
| H  | 0.09863  | 3.68087  | -0.55781 |

*01\_sw-g9.mol2*

E = -1262.142774  
H = -1261.991760  
G = -1262.054467  
G(quasi-RRHO) = -1262.051269

|    |          |          |          |
|----|----------|----------|----------|
| Si | -0.95878 | 0.54580  | 0.07215  |
| O  | -0.08834 | 1.74842  | -0.95007 |
| H  | -0.47383 | 1.75519  | -1.82759 |
| O  | -1.96636 | -0.52793 | 1.05268  |
| O  | -1.17570 | 1.74957  | 1.23917  |
| H  | -0.76334 | 2.56373  | 0.94394  |
| H  | -1.92979 | -0.29488 | 1.98084  |
| O  | -1.89920 | 0.20021  | -1.28031 |
| H  | -2.63255 | -0.40480 | -1.11685 |
| Si | 1.99584  | -0.40563 | 0.00928  |
| O  | 2.86981  | -0.54586 | 1.39169  |
| H  | 2.69943  | 0.10893  | 2.07081  |
| O  | 2.38838  | 0.93995  | -0.82422 |
| O  | 2.47864  | -1.76392 | -0.77612 |
| H  | 2.20916  | -1.84303 | -1.69266 |
| O  | 0.41131  | -0.40679 | 0.30861  |
| H  | 1.54248  | 1.42685  | -1.00460 |
| O  | -4.01472 | -1.57639 | -0.22805 |
| H  | -3.88689 | -2.51719 | -0.37054 |
| H  | -3.31416 | -1.29527 | 0.40953  |

*02\_sw-g11.mol2*

E = -1262.142347  
H = -1261.991403  
G = -1262.054371  
G(quasi-RRHO) = -1262.051053

|    |          |          |          |
|----|----------|----------|----------|
| Si | 0.95677  | -0.58526 | 0.09111  |
| O  | 0.06370  | -1.77855 | -0.86839 |
| H  | 0.55620  | -1.99202 | -1.66166 |
| O  | 1.88403  | 0.64198  | 1.03698  |
| O  | 1.30153  | -1.75745 | 1.24869  |
| H  | 1.80488  | -1.35321 | 1.95846  |
| H  | 1.27537  | 1.24695  | 1.46287  |
| O  | 1.97457  | -0.36051 | -1.22881 |
| H  | 2.67137  | 0.29246  | -1.09296 |
| Si | -2.00853 | 0.38440  | -0.01471 |
| O  | -2.95739 | 0.45077  | 1.32210  |

|   |          |          |          |
|---|----------|----------|----------|
| H | -3.04571 | -0.36376 | 1.81979  |
| O | -2.38109 | -0.90539 | -0.93816 |
| O | -2.40824 | 1.80655  | -0.72924 |
| H | -1.89790 | 2.05479  | -1.50185 |
| O | -0.43696 | 0.33928  | 0.35608  |
| H | -1.53897 | -1.41355 | -1.07227 |
| O | 3.94743  | 1.61647  | -0.28914 |
| H | 3.79440  | 2.51496  | -0.59092 |
| H | 3.20436  | 1.40021  | 0.32800  |

*03\_sw-g3.mol2*

E = -1262.145934  
H = -1261.994597  
G = -1262.053855  
G(quasi-RRHO) = -1262.051990

|    |          |          |          |
|----|----------|----------|----------|
| Si | -1.46306 | -0.15608 | -0.02174 |
| O  | -2.25683 | -0.69993 | 1.36500  |
| H  | -2.81209 | -1.44751 | 1.13306  |
| O  | -2.16033 | 1.08390  | -0.92361 |
| O  | -2.25955 | -1.39362 | -0.99247 |
| H  | -1.61834 | -1.90262 | -1.48820 |
| H  | -2.69382 | 0.69473  | -1.62009 |
| O  | -0.65205 | 1.07953  | 1.00905  |
| H  | -1.27572 | 1.44607  | 1.63939  |
| Si | 1.59391  | -0.53350 | -0.03180 |
| O  | 1.64213  | -0.27743 | 1.58985  |
| H  | 0.85373  | 0.24466  | 1.82376  |
| O  | 2.33378  | 0.64999  | -0.87703 |
| O  | 2.50262  | -1.84892 | -0.38751 |
| H  | 2.24007  | -2.67600 | 0.01985  |
| O  | 0.05374  | -0.73389 | -0.49251 |
| H  | 1.91138  | 1.52639  | -0.77272 |
| O  | 0.81626  | 2.88333  | -0.34582 |
| H  | 1.21225  | 3.50096  | 0.27426  |
| H  | 0.19247  | 2.32388  | 0.18060  |

*04\_sw-g6.mol2*

E = -1262.146876  
H = -1261.995301  
G = -1262.053780  
G(quasi-RRHO) = -1262.052272

|    |          |          |          |
|----|----------|----------|----------|
| Si | -1.39316 | -0.29067 | -0.00824 |
| O  | -0.68863 | 0.75712  | 1.27542  |
| H  | -1.33366 | 0.91579  | 1.96739  |
| O  | -2.03751 | 1.08128  | -0.76042 |
| O  | -2.28639 | -1.05195 | 1.20421  |
| H  | -2.80715 | -1.75926 | 0.81779  |
| H  | -2.51422 | 0.80454  | -1.54623 |
| O  | -2.09270 | -1.36923 | -1.21040 |
| H  | -1.41876 | -1.70486 | -1.80145 |
| Si | 1.67823  | -0.36503 | -0.03209 |
| O  | 2.74602  | -1.51219 | -0.50806 |
| H  | 3.07514  | -1.44648 | -1.40587 |
| O  | 1.78921  | -0.36185 | 1.60329  |
| O  | 2.15853  | 1.03942  | -0.71760 |
| H  | 1.51263  | 1.77207  | -0.64214 |
| O  | 0.16597  | -0.73638 | -0.48079 |
| H  | 0.95459  | 0.00553  | 1.94252  |
| O  | 0.14883  | 2.85924  | -0.20436 |
| H  | -0.53243 | 2.71347  | -0.87291 |
| H  | -0.15367 | 2.23537  | 0.49524  |

*05\_sw-g2.mol2*

E = -1262.147031  
H = -1261.995387  
G = -1262.053614  
G(quasi-RRHO) = -1262.052116

|    |          |          |          |
|----|----------|----------|----------|
| Si | -1.39447 | -0.28790 | -0.00609 |
| O  | -2.29447 | -1.04434 | 1.20447  |
| H  | -2.81752 | -1.74960 | 0.81741  |
| O  | -2.02679 | 1.08754  | -0.76194 |
| O  | -2.09719 | -1.36515 | -1.20731 |
| H  | -1.42686 | -1.69095 | -1.80793 |
| H  | -2.50333 | 0.81374  | -1.54885 |
| O  | -0.69016 | 0.75738  | 1.27963  |
| H  | -1.33586 | 0.91518  | 1.97115  |
| Si | 1.67957  | -0.36099 | -0.04754 |
| O  | 1.79043  | -0.33632 | 1.59081  |
| H  | 0.95143  | 0.02564  | 1.92720  |
| O  | 2.16549  | 1.03242  | -0.74406 |
| O  | 2.76044  | -1.45212 | -0.61647 |
| H  | 2.74825  | -2.31946 | -0.20837 |
| O  | 0.16358  | -0.74105 | -0.47645 |
| H  | 1.53012  | 1.77125  | -0.64681 |



|   |          |         |          |
|---|----------|---------|----------|
| O | 0.16795  | 2.85762 | -0.19300 |
| H | -0.13942 | 2.23465 | 0.50503  |
| H | -0.51230 | 2.71625 | -0.86358 |

*06\_sw-g4.mol2*

E = -1262.141620  
H = -1261.990644  
G = -1262.052229  
G(quasi-RRHO) = -1262.049829

|    |          |          |          |
|----|----------|----------|----------|
| Si | 0.89544  | 0.51383  | -0.07583 |
| O  | 1.25151  | 1.85593  | -1.02966 |
| H  | 1.87477  | 1.60115  | -1.71318 |
| O  | 1.83271  | 0.25099  | 1.29239  |
| O  | 1.97980  | -0.51360 | -1.07739 |
| H  | 1.45949  | -1.14210 | -1.57953 |
| H  | 2.61589  | -0.29045 | 1.13759  |
| O  | -0.25124 | 1.45400  | 0.88669  |
| H  | 0.18174  | 2.01607  | 1.53001  |
| Si | -1.93680 | -0.39133 | -0.02800 |
| O  | -2.61954 | 1.03180  | -0.48883 |
| H  | -2.04765 | 1.75639  | -0.20294 |
| O  | -2.09883 | -0.68859 | 1.57853  |
| O  | -2.83779 | -1.58896 | -0.68964 |
| H  | -2.93450 | -1.58263 | -1.64315 |
| O  | -0.39671 | -0.49478 | -0.52689 |
| H  | -1.53155 | -0.09869 | 2.08576  |
| O  | 4.08728  | -1.36811 | 0.27043  |
| H  | 4.03239  | -2.30412 | 0.47695  |
| H  | 3.35095  | -1.18005 | -0.36282 |

*07\_sw-g10.mol2*

E = -1262.141315  
H = -1261.990150  
G = -1262.052109  
G(quasi-RRHO) = -1262.049371

|    |          |          |          |
|----|----------|----------|----------|
| Si | -1.11294 | -0.74292 | 0.02653  |
| O  | -1.04913 | 0.79452  | -0.98709 |
| H  | -1.33574 | 0.57442  | -1.87621 |
| O  | -1.35503 | -2.25304 | 0.85893  |
| O  | -1.99614 | 0.07246  | 1.20038  |
| H  | -2.14238 | 1.00942  | 1.02758  |

|    |          |          |          |
|----|----------|----------|----------|
| H  | -1.42830 | -2.12766 | 1.80524  |
| O  | -1.65368 | -1.47908 | -1.39865 |
| H  | -1.88933 | -2.39209 | -1.22199 |
| Si | 1.87810  | 0.15045  | 0.02872  |
| O  | 2.63308  | 0.59224  | 1.41702  |
| H  | 2.23916  | 1.32066  | 1.89991  |
| O  | 1.49781  | 1.46684  | -0.85833 |
| O  | 3.05180  | -0.75860 | -0.67082 |
| H  | 2.78923  | -1.28457 | -1.42802 |
| O  | 0.55090  | -0.72311 | 0.29114  |
| H  | 0.53155  | 1.41784  | -1.05526 |
| O  | -2.24565 | 2.85251  | 0.22312  |
| H  | -3.11449 | 3.05178  | -0.13395 |
| H  | -1.83367 | 2.20689  | -0.39632 |

*08\_sw-g8.mol2*

E = -1262.144319  
H = -1261.992748  
G = -1262.051780  
G(quasi-RRHO) = -1262.049999

|    |          |          |          |
|----|----------|----------|----------|
| Si | -1.42413 | -0.27793 | -0.03730 |
| O  | -0.70408 | 0.78039  | 1.27787  |
| H  | -1.38851 | 1.20363  | 1.80154  |
| O  | -2.18783 | -1.18209 | -1.30869 |
| O  | -2.03929 | -1.32813 | 1.13219  |
| H  | -1.70870 | -1.11964 | 2.00737  |
| H  | -2.03987 | -2.12462 | -1.22671 |
| O  | -2.21463 | 1.11121  | -0.58117 |
| H  | -2.77844 | 0.88983  | -1.32595 |
| Si | 1.65685  | -0.37147 | -0.08604 |
| O  | 2.67314  | -1.52394 | -0.65472 |
| H  | 2.57820  | -2.40111 | -0.28002 |
| O  | 1.71913  | -0.40478 | 1.55521  |
| O  | 2.27356  | 1.00114  | -0.71976 |
| H  | 1.67550  | 1.76973  | -0.62859 |
| O  | 0.13453  | -0.60888 | -0.57963 |
| H  | 0.90306  | 0.00322  | 1.89536  |
| O  | 0.33178  | 2.86712  | -0.13244 |
| H  | -0.29098 | 2.99755  | -0.85358 |
| H  | -0.09889 | 2.17669  | 0.42627  |

09\_sw-g5.mol2

E = -1262.138529  
H = -1261.987393  
G = -1262.048531  
G(quasi-RRHO) = -1262.046377

|    |          |          |          |
|----|----------|----------|----------|
| Si | -1.34997 | -0.32169 | 0.01072  |
| O  | -2.07680 | -1.14225 | -1.27704 |
| H  | -2.67000 | -0.54661 | -1.73971 |
| O  | -2.05933 | -0.39707 | 1.53865  |
| O  | -2.22758 | 1.12778  | -0.43497 |
| H  | -1.76128 | 1.95036  | -0.26159 |
| H  | -2.67589 | 0.33231  | 1.63056  |
| O  | -0.40466 | -1.78717 | 0.34649  |
| H  | -0.87431 | -2.58386 | 0.09750  |
| Si | 1.62722  | -0.18350 | -0.02300 |
| O  | 1.88815  | -1.16680 | -1.31360 |
| H  | 1.19300  | -1.82714 | -1.39522 |
| O  | 1.94058  | -0.88481 | 1.42430  |
| O  | 2.77493  | 0.98441  | -0.10239 |
| H  | 2.88401  | 1.42971  | -0.94412 |
| O  | 0.15225  | 0.51052  | -0.08491 |
| H  | 1.22754  | -1.50545 | 1.62366  |
| O  | -0.15693 | 3.24275  | -0.05228 |
| H  | 0.00990  | 3.61101  | 0.81888  |
| H  | 0.14057  | 2.31338  | -0.01193 |

10\_sw-g7.mol2

E = -1262.138428  
H = -1261.986956  
G = -1262.047327  
G(quasi-RRHO) = -1262.045348

|    |          |          |          |
|----|----------|----------|----------|
| Si | -1.35990 | -0.22826 | -0.03477 |
| O  | -0.69991 | -1.79058 | -0.51747 |
| H  | -1.38106 | -2.46143 | -0.57513 |
| O  | -1.38504 | -0.70658 | 1.59817  |
| O  | -2.70228 | -0.55412 | -1.01118 |
| H  | -3.29111 | 0.20372  | -0.99889 |
| H  | -1.73830 | 0.00889  | 2.13241  |
| O  | -2.02759 | 1.35326  | 0.28813  |
| H  | -1.38403 | 2.06378  | 0.34815  |
| Si | 1.58297  | -0.29641 | -0.02203 |
| O  | 2.85879  | 0.71674  | -0.17737 |

|   |         |          |          |
|---|---------|----------|----------|
| H | 2.98614 | 1.36045  | 0.52163  |
| O | 1.93806 | -1.50212 | -1.06791 |
| O | 1.48644 | -0.78278 | 1.54159  |
| H | 0.56346 | -0.88341 | 1.83192  |
| O | 0.18268 | 0.45003  | -0.41212 |
| H | 1.11202 | -1.99510 | -1.20467 |
| O | 0.28386 | 3.20543  | -0.21330 |
| H | 0.14620 | 3.67071  | -1.04211 |
| H | 0.38384 | 2.26374  | -0.44661 |

TS3-cw, water cleavage from IM2, H<sub>2</sub>O acting as catalyst

*00\_cw-k1.mol2*

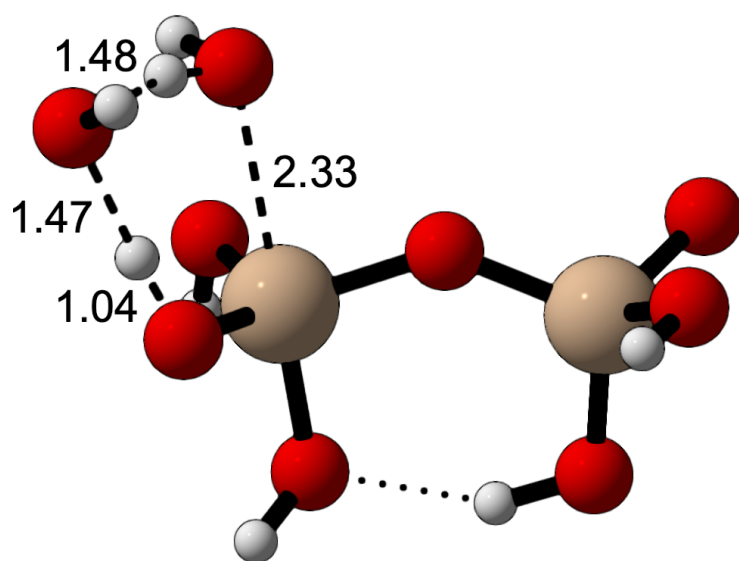

E = -1262.121476  
H = -1261.974558  
G = -1262.034970  
G(quasi-RRHO) = -1262.032248

|    |          |          |          |
|----|----------|----------|----------|
| Si | -0.89998 | 0.66086  | 0.00474  |
| O  | -1.40094 | 1.47809  | 1.35921  |
| H  | -1.17425 | 2.40930  | 1.30262  |
| O  | -1.93722 | 0.24285  | -1.15809 |
| O  | 0.38466  | -0.32904 | 0.29153  |
| H  | -2.65253 | -0.49111 | -0.99601 |
| O  | -2.00034 | -0.98367 | 1.24032  |
| H  | -2.42735 | -0.46958 | 1.93013  |
| O  | -3.64175 | -1.49636 | -0.57073 |
| H  | -3.48603 | -2.34450 | -0.99033 |

|    |          |          |          |
|----|----------|----------|----------|
| H  | -2.74176 | -1.30209 | 0.58870  |
| O  | -0.10527 | 1.95241  | -0.78599 |
| H  | -0.52464 | 2.18234  | -1.61739 |
| Si | 1.97506  | -0.37964 | -0.01577 |
| O  | 2.85563  | -0.64077 | 1.33638  |
| H  | 2.95572  | 0.09968  | 1.93698  |
| O  | 2.42345  | 1.01149  | -0.74105 |
| H  | 1.64083  | 1.57503  | -0.90420 |
| O  | 2.35871  | -1.70356 | -0.89561 |
| H  | 1.86361  | -1.84754 | -1.70382 |

TS3-sw, water cleavage from IM2, H<sub>2</sub>O acting as spectator  
*00\_sw-k1.mol2*

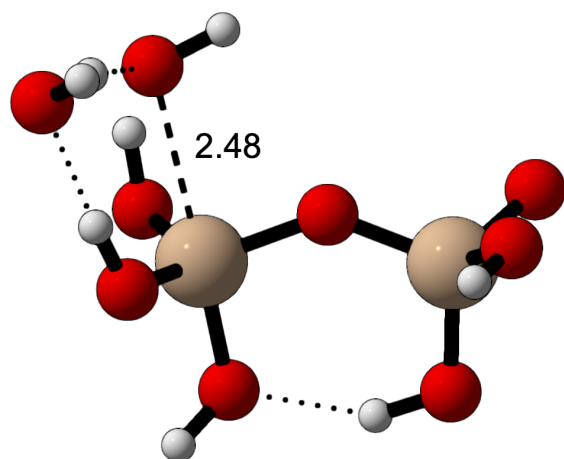

E = -1262.127868  
H = -1261.980330  
G = -1262.041936  
G(quasi-RRHO) = -1262.038877

|    |          |          |          |
|----|----------|----------|----------|
| Si | -0.85189 | 0.78948  | 0.03590  |
| O  | -1.47226 | 1.47900  | 1.38768  |
| H  | -1.93397 | 0.72638  | 1.81229  |
| O  | -1.82951 | 0.42255  | -1.21567 |
| O  | -2.16142 | -0.94153 | 1.22981  |
| H  | -1.50620 | -1.58440 | 1.50569  |
| H  | -2.48418 | -0.29735 | -1.10373 |
| O  | 0.00043  | 2.08192  | -0.63576 |
| H  | -0.44882 | 2.51460  | -1.36380 |
| Si | 1.95734  | -0.41008 | -0.01977 |
| O  | 2.83885  | -0.74913 | 1.31311  |

|   |          |          |          |
|---|----------|----------|----------|
| H | 2.93924  | -0.04640 | 1.95753  |
| O | 2.47049  | 0.96090  | -0.74050 |
| O | 2.24864  | -1.73638 | -0.92903 |
| H | 1.79043  | -1.79854 | -1.76892 |
| O | 0.37855  | -0.26498 | 0.32657  |
| H | 1.73375  | 1.59070  | -0.85488 |
| O | -3.61808 | -1.57165 | -0.67770 |
| H | -3.37428 | -2.41737 | -1.06022 |
| H | -3.03774 | -1.44502 | 0.18206  |

TS4-cw, water cleavage from IM2, H<sub>2</sub>O acting as catalyst

*00\_cw-m1.mol2*

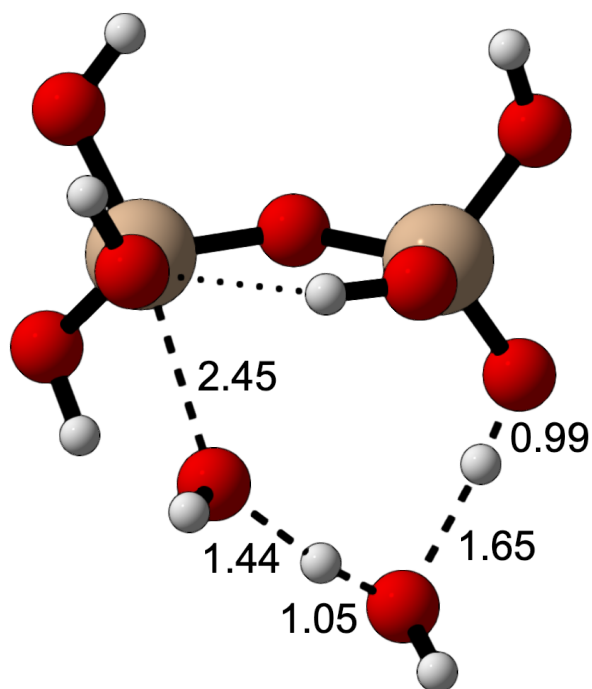

E = -1262.130548  
H = -1261.982980  
G = -1262.041149  
G(quasi-RRHO) = -1262.039618

|    |         |          |          |
|----|---------|----------|----------|
| Si | 1.59368 | -0.02026 | -0.15369 |
| O  | 2.23586 | 1.29248  | -0.88288 |
| H  | 1.65609 | 2.01263  | -0.55335 |
| O  | 2.71398 | -1.15965 | -0.62688 |
| O  | 0.22581 | 1.91170  | 0.46916  |
| H  | 0.39742 | 2.08513  | 1.39639  |
| H  | 2.38800 | -2.05994 | -0.66304 |

|    |          |          |          |
|----|----------|----------|----------|
| O  | 0.17617  | -0.61661 | -0.72218 |
| O  | 1.63640  | -0.09849 | 1.51028  |
| Si | -1.29197 | -0.85942 | -0.04580 |
| O  | -1.12820 | -0.83165 | 1.58555  |
| O  | -2.44180 | 0.12215  | -0.61414 |
| H  | -1.05046 | 2.44802  | 0.06037  |
| O  | -1.85752 | -2.33484 | -0.49539 |
| H  | -1.36171 | -3.09183 | -0.17917 |
| H  | -0.26432 | -0.49902 | 1.87153  |
| H  | 2.27096  | -0.74692 | 1.82677  |
| O  | -1.99080 | 2.70848  | -0.32949 |
| H  | -2.48838 | 3.11785  | 0.38184  |
| H  | -2.33075 | 1.10108  | -0.50084 |

*01\_cw-m2.mol2*

E = -1262.125746

H = -1261.981155

G = -1262.038562

G(quasi-RRHO) = -1262.037149

|    |          |          |          |
|----|----------|----------|----------|
| Si | -1.39972 | -0.30471 | -0.04050 |
| O  | -1.59036 | 0.27203  | 1.51669  |
| H  | -1.61394 | -0.46371 | 2.13175  |
| O  | -1.41557 | -1.97490 | 0.38748  |
| O  | -1.55357 | 1.59309  | -0.47919 |
| H  | -1.61189 | 1.68962  | -1.43405 |
| H  | -0.53949 | -2.27767 | 0.64464  |
| O  | 0.12089  | -0.27299 | -0.70995 |
| O  | -2.67247 | -0.45209 | -1.10716 |
| Si | 1.62450  | -0.31347 | -0.08687 |
| O  | 2.66901  | -0.79317 | -1.27670 |
| O  | 2.06471  | 1.07262  | 0.55791  |
| H  | -0.69785 | 2.15372  | -0.13983 |
| O  | 1.55341  | -1.59203 | 0.96771  |
| H  | 2.33678  | -1.77261 | 1.48976  |
| H  | 3.17354  | -0.08231 | -1.67537 |
| H  | -2.90149 | -1.37703 | -1.22149 |
| O  | 0.41400  | 2.81459  | 0.36542  |
| H  | 0.71699  | 3.48420  | -0.25172 |
| H  | 1.26994  | 1.96307  | 0.46192  |

TS4-sw, water cleavage from IM2, H<sub>2</sub>O acting as spectator

*00\_sw-m1.mol2*

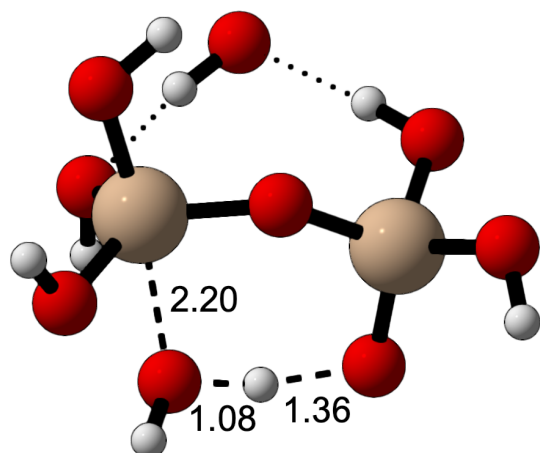

E = -1262.133813  
H = -1261.985568  
G = -1262.044212  
G(quasi-RRHO) = -1262.042475

|    |          |          |          |
|----|----------|----------|----------|
| Si | 1.41011  | -0.21180 | -0.23648 |
| O  | 1.72567  | 1.05112  | 0.81085  |
| H  | 1.58433  | 0.77158  | 1.72060  |
| O  | 2.07804  | 0.47666  | -1.62418 |
| O  | 0.77296  | -1.12916 | 1.65732  |
| H  | 1.10067  | -2.03154 | 1.64524  |
| H  | 1.42321  | 0.82077  | -2.23218 |
| O  | -0.14094 | -0.35778 | -0.73045 |
| O  | 2.39367  | -1.54633 | -0.17960 |
| Si | -1.67083 | -0.33818 | -0.08971 |
| O  | -2.66128 | -1.14510 | -1.14325 |
| O  | -1.63830 | -0.96137 | 1.36606  |
| H  | -0.31104 | -1.13362 | 1.61899  |
| O  | -2.22423 | 1.20440  | -0.23388 |
| H  | -1.57320 | 1.89457  | -0.01343 |
| H  | -2.78117 | -2.07325 | -0.93677 |
| H  | 2.95878  | -1.58297 | -0.95524 |
| O  | -0.18224 | 3.03315  | 0.33561  |
| H  | 0.55695  | 2.43016  | 0.54804  |
| H  | -0.29534 | 3.59929  | 1.10360  |

*01\_sw-m2.mol2*

E = -1262.133000



H = -1261.985228  
G = -1262.043744  
G(quasi-RRHO) = -1262.042052

|    |          |          |          |
|----|----------|----------|----------|
| Si | -1.44588 | -0.30329 | -0.20604 |
| O  | -2.37936 | -1.51462 | 0.41483  |
| H  | -2.20123 | -1.62454 | 1.35221  |
| O  | -2.17056 | -0.33748 | -1.73081 |
| O  | -0.74042 | -0.27245 | 1.87387  |
| H  | -0.95972 | 0.58381  | 2.24905  |
| H  | -1.57040 | -0.10038 | -2.43872 |
| O  | 0.10816  | -0.57533 | -0.62853 |
| O  | -1.80202 | 1.29025  | 0.20250  |
| Si | 1.65463  | -0.40202 | -0.05826 |
| O  | 2.24948  | 0.99626  | -0.68988 |
| O  | 1.64086  | -0.51215 | 1.52390  |
| H  | 0.36030  | -0.37116 | 1.82752  |
| O  | 2.59503  | -1.52915 | -0.81811 |
| H  | 2.65029  | -2.37352 | -0.36826 |
| H  | 1.70741  | 1.77417  | -0.46738 |
| H  | -2.39027 | 1.66883  | -0.45752 |
| O  | 0.44771  | 2.97300  | 0.13646  |
| H  | -0.37770 | 2.45187  | 0.17139  |
| H  | 0.26771  | 3.71873  | -0.44209 |

*02\_sw-m3.mol2*

E = -1262.130293  
H = -1261.981485  
G = -1262.043284  
G(quasi-RRHO) = -1262.040452

|    |          |          |          |
|----|----------|----------|----------|
| Si | -0.98377 | -0.89999 | -0.00952 |
| O  | -1.42163 | -1.51769 | 1.46295  |
| H  | -1.46483 | -0.82507 | 2.12620  |
| O  | -1.18414 | -2.33650 | -0.89010 |
| O  | -0.92436 | 0.92228  | 1.10460  |
| H  | -1.51467 | 1.61000  | 0.75802  |
| H  | -0.35416 | -2.69625 | -1.20314 |
| O  | 0.60636  | -0.66716 | -0.32776 |
| O  | -2.13364 | -0.04147 | -0.88017 |
| Si | 1.89118  | 0.32669  | -0.02657 |
| O  | 2.53496  | 0.77308  | -1.48547 |
| O  | 1.45056  | 1.52229  | 0.90536  |
| H  | 0.07515  | 1.28159  | 1.07310  |

|   |          |          |          |
|---|----------|----------|----------|
| O | 3.11310  | -0.64266 | 0.53040  |
| H | 2.92170  | -1.12047 | 1.33889  |
| H | 2.22199  | 1.61663  | -1.81508 |
| H | -2.47052 | -0.58950 | -1.59395 |
| O | -2.88867 | 2.48381  | -0.24771 |
| H | -2.75889 | 1.62527  | -0.69493 |
| H | -2.57976 | 3.15602  | -0.86049 |

*03\_sw-m4.mol2*

E = -1262.127335  
H = -1261.977856  
G = -1262.039642  
G(quasi-RRHO) = -1262.037186

|    |          |          |          |
|----|----------|----------|----------|
| Si | -0.99637 | 0.27509  | 0.29414  |
| O  | -0.87514 | 1.29522  | 1.58513  |
| H  | -1.28401 | 0.91517  | 2.36631  |
| O  | -1.92592 | -0.98368 | 0.95600  |
| O  | 0.12735  | 2.17629  | -0.67366 |
| H  | -0.22571 | 2.14256  | -1.56592 |
| H  | -1.41034 | -1.74968 | 1.21525  |
| O  | 0.35805  | -0.51797 | -0.11586 |
| O  | -1.99101 | 0.74634  | -0.92397 |
| Si | 2.00863  | -0.34391 | -0.14130 |
| O  | 2.54283  | -1.61729 | -1.06078 |
| O  | 2.43411  | 1.09811  | -0.59660 |
| H  | 1.08808  | 1.84510  | -0.71644 |
| O  | 2.56886  | -0.80097 | 1.35273  |
| H  | 2.90213  | -0.07324 | 1.87940  |
| H  | 2.24513  | -1.61674 | -1.97176 |
| H  | -2.77700 | 0.18386  | -1.02298 |
| O  | -4.12380 | -1.08691 | -0.65763 |
| H  | -3.45552 | -1.32338 | 0.01368  |
| H  | -4.17705 | -1.83334 | -1.26016 |

*04\_sw-m5.mol2*

E = -1262.126119  
H = -1261.976360  
G = -1262.038446  
G(quasi-RRHO) = -1262.035974

|    |          |          |          |
|----|----------|----------|----------|
| Si | -0.98366 | -0.92420 | -0.04446 |
| O  | -1.02150 | -1.51572 | 1.49199  |

|    |          |          |          |
|----|----------|----------|----------|
| H  | -1.00844 | -2.47619 | 1.48468  |
| O  | -1.16684 | -2.33975 | -0.93093 |
| O  | -0.95731 | 1.06698  | 1.30604  |
| H  | -1.39306 | 1.78925  | 0.83226  |
| H  | -0.45281 | -2.51367 | -1.54550 |
| O  | 0.42009  | -0.34113 | -0.60635 |
| O  | -2.35402 | -0.12569 | -0.54770 |
| Si | 1.82856  | 0.32730  | -0.04521 |
| O  | 2.56771  | 0.98348  | -1.38292 |
| O  | 1.59743  | 1.34013  | 1.13108  |
| H  | 0.03013  | 1.27693  | 1.31855  |
| O  | 2.74134  | -1.01849 | 0.28934  |
| H  | 3.56543  | -0.84592 | 0.74758  |
| H  | 2.40418  | 1.92102  | -1.49759 |
| H  | -2.81693 | -0.64551 | -1.21090 |
| O  | -2.71507 | 2.59278  | -0.38854 |
| H  | -2.69284 | 1.64630  | -0.62350 |
| H  | -2.35889 | 3.06367  | -1.14616 |

PC-w, product complexes

*00\_cw-q1.mol2*

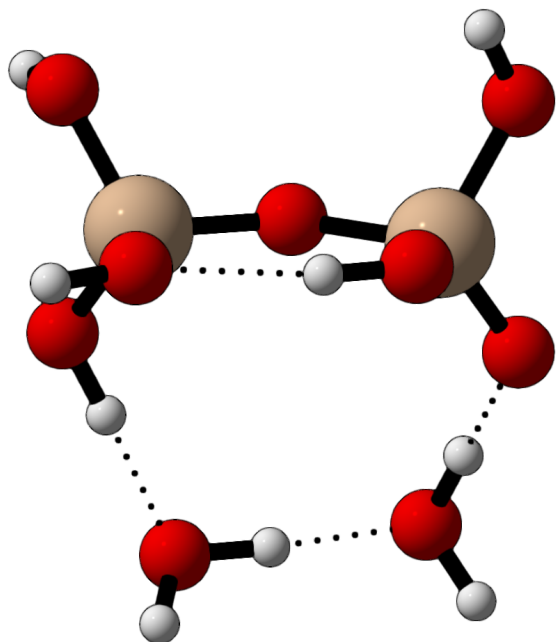

|               |                |
|---------------|----------------|
| E             | = -1262.149873 |
| H             | = -1262.000323 |
| G             | = -1262.065381 |
| G(quasi-RRHO) | = -1262.061522 |

|    |          |          |          |
|----|----------|----------|----------|
| Si | 1.61702  | -0.27879 | -0.12561 |
| O  | 2.12823  | 1.24436  | -0.32125 |
| H  | 1.51146  | 1.98396  | -0.10650 |
| O  | 2.65977  | -1.24361 | -0.93983 |
| O  | 0.49844  | 3.29105  | 0.22587  |
| H  | 0.54695  | 3.55844  | 1.14717  |
| H  | 3.01207  | -0.90322 | -1.76417 |
| O  | 0.09106  | -0.48161 | -0.60244 |
| O  | 1.63679  | -0.79058 | 1.44088  |
| Si | -1.39936 | -0.92668 | -0.00515 |
| O  | -1.09837 | -1.51692 | 1.51700  |
| O  | -2.46449 | 0.21711  | -0.08730 |
| H  | -0.45617 | 3.07777  | 0.04616  |
| O  | -1.90033 | -2.22398 | -0.91353 |
| H  | -1.37542 | -3.01958 | -0.80924 |
| H  | -0.18946 | -1.38580 | 1.81411  |
| H  | 2.45545  | -0.71588 | 1.93443  |
| O  | -2.01178 | 2.68493  | -0.36297 |
| H  | -2.66946 | 3.15461  | 0.15467  |
| H  | -2.19730 | 1.68031  | -0.23747 |

*01\_cw-p1.mol2*

E = -1262.151643

H = -1262.001724

G = -1262.064620

G(quasi-RRHO) = -1262.061657

|    |          |          |          |
|----|----------|----------|----------|
| Si | 0.65000  | -0.43258 | 0.01300  |
| O  | 1.29923  | -1.25274 | -1.27191 |
| H  | 2.26223  | -1.29609 | -1.20364 |
| O  | 0.80191  | 1.14440  | -0.07200 |
| O  | 1.28728  | -1.10838 | 1.38556  |
| H  | 2.24966  | -1.16949 | 1.33026  |
| H  | 2.29076  | 1.68192  | -0.09266 |
| O  | 3.83573  | -0.74650 | 0.03021  |
| H  | 4.75638  | -1.01749 | 0.00886  |
| Si | -2.25766 | 0.11999  | -0.00187 |
| O  | -3.26504 | -0.33809 | -1.21229 |
| H  | -2.87238 | -0.48348 | -2.07524 |
| O  | -1.75539 | 1.65776  | -0.12076 |
| O  | -3.15738 | -0.00816 | 1.35896  |
| H  | -3.72317 | -0.77825 | 1.43831  |
| O  | -0.94943 | -0.85471 | 0.02655  |

|   |          |         |          |
|---|----------|---------|----------|
| H | -0.75262 | 1.67747 | -0.11660 |
| O | 3.27806  | 1.89469 | -0.13408 |
| H | 3.47910  | 2.41771 | 0.64554  |
| H | 3.81768  | 0.23786 | -0.01256 |

*02\_sw-p2.mol2*

E = -1262.149006  
H = -1261.998980  
G = -1262.064582  
G(quasi-RRHO) = -1262.060276

|    |          |          |          |
|----|----------|----------|----------|
| Si | 0.65695  | 0.03365  | 0.25017  |
| O  | 1.52247  | 1.32099  | 0.03237  |
| H  | 3.01391  | 1.38268  | -0.24670 |
| O  | 1.35649  | -1.39174 | -0.17762 |
| O  | 4.02616  | 1.36658  | -0.39288 |
| H  | 4.18771  | 1.76073  | -1.25300 |
| H  | 2.33204  | -1.40135 | -0.20509 |
| O  | 0.14510  | -0.12754 | 1.84871  |
| H  | 0.58038  | 0.48000  | 2.44982  |
| Si | -2.36308 | 0.01018  | -0.23296 |
| O  | -3.12443 | 1.31832  | -0.85261 |
| H  | -2.86606 | 2.17445  | -0.50694 |
| O  | -2.55196 | -0.08286 | 1.38727  |
| O  | -3.15760 | -1.19378 | -1.00310 |
| H  | -2.88836 | -2.09092 | -0.79854 |
| O  | -0.78158 | 0.00042  | -0.57618 |
| H  | -1.69000 | -0.10458 | 1.84246  |
| O  | 4.12973  | -1.30833 | -0.27416 |
| H  | 4.49264  | -1.70198 | -1.07155 |
| H  | 4.20852  | -0.32907 | -0.38583 |

*03\_cw-h\_new-conf-1.mol2*

E = -1262.151477  
H = -1262.001494  
G = -1262.063886  
G(quasi-RRHO) = -1262.061159

|    |         |          |          |
|----|---------|----------|----------|
| Si | 0.65217 | -0.43146 | 0.02589  |
| O  | 1.29834 | -1.25758 | -1.25632 |
| H  | 2.26165 | -1.29953 | -1.19154 |
| O  | 0.79614 | 1.14549  | -0.07099 |
| O  | 1.29947 | -1.09432 | 1.40017  |

|    |          |          |          |
|----|----------|----------|----------|
| H  | 2.26168  | -1.15305 | 1.33939  |
| H  | 2.28344  | 1.68525  | -0.12173 |
| O  | 3.83968  | -0.73666 | 0.02777  |
| H  | 4.76098  | -1.00487 | 0.00071  |
| Si | -2.25491 | 0.10071  | -0.01153 |
| O  | -3.07471 | -0.35275 | -1.35420 |
| H  | -3.98095 | -0.05077 | -1.43703 |
| O  | -1.76462 | 1.65068  | -0.02079 |
| O  | -3.29304 | -0.16433 | 1.22995  |
| H  | -3.09352 | 0.27837  | 2.05708  |
| O  | -0.94471 | -0.86255 | 0.05495  |
| H  | -0.76291 | 1.67767  | -0.05733 |
| O  | 3.26989  | 1.89871  | -0.17897 |
| H  | 3.47902  | 2.43699  | 0.58804  |
| H  | 3.81742  | 0.24678  | -0.03118 |

*04\_cw-p2.mol2*

E = -1262.146428  
H = -1261.996146  
G = -1262.063699  
G(quasi-RRHO) = -1262.058928

|    |          |          |          |
|----|----------|----------|----------|
| Si | -0.64906 | -0.29874 | 0.44360  |
| O  | -1.47179 | -1.39906 | -0.49795 |
| H  | -0.95254 | -2.11439 | -0.87070 |
| O  | -1.58653 | 0.85198  | 0.91494  |
| O  | 0.66458  | 0.13909  | -0.46448 |
| H  | -2.98955 | 1.36031  | 0.45196  |
| O  | -4.15044 | -0.74736 | -1.27056 |
| H  | -3.25633 | -1.06710 | -1.07363 |
| O  | -3.91978 | 1.63392  | 0.16605  |
| H  | -3.81636 | 2.42453  | -0.36800 |
| H  | -4.18329 | 0.12170  | -0.82731 |
| O  | 0.08394  | -1.15450 | 1.68488  |
| H  | -0.39540 | -1.15578 | 2.51560  |
| Si | 2.27403  | 0.22733  | -0.28858 |
| O  | 3.05643  | -0.41667 | -1.57009 |
| H  | 2.96815  | -1.36185 | -1.70434 |
| O  | 2.69302  | -0.51541 | 1.10452  |
| H  | 1.91707  | -0.86289 | 1.57774  |
| O  | 2.81445  | 1.76860  | -0.34234 |
| H  | 2.48766  | 2.37041  | 0.32871  |

*05\_sw-q1.mol2*

E = -1262.150053  
H = -1262.000308  
G = -1262.063170  
G(quasi-RRHO) = -1262.060618

|    |          |          |          |
|----|----------|----------|----------|
| Si | 1.45249  | -0.55824 | -0.15226 |
| O  | 1.59671  | 1.02984  | 0.20292  |
| H  | 1.16519  | 1.31672  | 1.05611  |
| O  | 2.38437  | -0.88219 | -1.45900 |
| O  | 0.20696  | 1.68901  | 2.33130  |
| H  | 0.54125  | 1.35802  | 3.16815  |
| H  | 1.96549  | -0.80733 | -2.31825 |
| O  | -0.07135 | -0.98381 | -0.48069 |
| O  | 2.07765  | -1.37573 | 1.12038  |
| Si | -1.57438 | -0.41353 | -0.01528 |
| O  | -2.61925 | -1.67618 | -0.26269 |
| O  | -1.57217 | 0.13470  | 1.45815  |
| H  | -0.55031 | 1.05392  | 2.03369  |
| O  | -2.02871 | 0.63330  | -1.20666 |
| H  | -1.37970 | 1.33119  | -1.40143 |
| H  | -2.86715 | -2.13865 | 0.53905  |
| H  | 1.93954  | -2.32457 | 1.14226  |
| O  | 0.06150  | 2.47276  | -1.64152 |
| H  | 0.69245  | 2.09808  | -0.99762 |
| H  | -0.08592 | 3.38375  | -1.37397 |

*06\_sw-p1.mol2*

E = -1262.149739  
H = -1261.999441  
G = -1262.062293  
G(quasi-RRHO) = -1262.059174

|    |          |          |          |
|----|----------|----------|----------|
| Si | -0.59050 | -0.58739 | 0.04986  |
| O  | -0.19817 | -1.17392 | 1.57425  |
| H  | -0.48332 | -2.07566 | 1.73349  |
| O  | -0.83453 | 1.03289  | 0.29106  |
| O  | -1.71658 | -1.39211 | -0.67464 |
| H  | -3.17252 | -0.90609 | -0.77792 |
| H  | -1.75640 | 1.32641  | 0.43685  |
| O  | -4.12464 | -0.54470 | -0.77724 |
| H  | -4.37391 | -0.42184 | -1.69606 |
| Si | 2.20419  | 0.19887  | -0.19555 |
| O  | 2.60403  | -0.43520 | 1.26332  |

|   |          |          |          |
|---|----------|----------|----------|
| H | 1.83652  | -0.83583 | 1.69869  |
| O | 1.89080  | 1.80313  | -0.13356 |
| O | 3.48790  | 0.06537  | -1.18995 |
| H | 4.01080  | -0.73544 | -1.11981 |
| O | 0.87830  | -0.57322 | -0.73655 |
| H | 0.94535  | 1.96308  | 0.01074  |
| O | -3.48893 | 1.68150  | 0.58166  |
| H | -3.75117 | 2.48579  | 0.12667  |
| H | -3.83242 | 0.92899  | 0.04019  |

*07\_cw-h\_new-conf-2.mol2*

E = -1262.142838  
H = -1261.994318  
G = -1262.055557  
G(quasi-RRHO) = -1262.052953

|    |          |          |          |
|----|----------|----------|----------|
| Si | -0.69654 | -0.39276 | -0.01800 |
| O  | -1.43331 | -1.11710 | 1.24283  |
| H  | -2.39963 | -1.17752 | 0.99522  |
| O  | -0.73514 | 1.24820  | 0.12320  |
| O  | -1.42541 | -0.88997 | -1.39009 |
| H  | -2.39037 | -0.99823 | -1.16555 |
| H  | -1.65776 | 1.59752  | 0.14206  |
| O  | -3.67810 | -0.82751 | -0.05567 |
| H  | -4.53290 | -1.25835 | -0.06403 |
| Si | 2.28538  | 0.05804  | 0.00511  |
| O  | 3.01661  | -0.40864 | 1.38651  |
| H  | 3.93051  | -0.14815 | 1.51617  |
| O  | 1.97223  | 1.65628  | -0.06900 |
| O  | 3.30023  | -0.35157 | -1.20662 |
| H  | 3.14999  | 0.05906  | -2.06051 |
| O  | 0.88826  | -0.77347 | -0.04911 |
| H  | 1.02724  | 1.86468  | 0.02958  |
| O  | -3.40156 | 1.69914  | 0.18051  |
| H  | -3.76608 | 2.15648  | -0.58076 |
| H  | -3.63527 | 0.70780  | 0.06767  |

One C(NH<sub>2</sub>)<sub>3</sub><sup>+</sup>

RC-g, Reactant Complexes

*00\_sg-c.mol2*



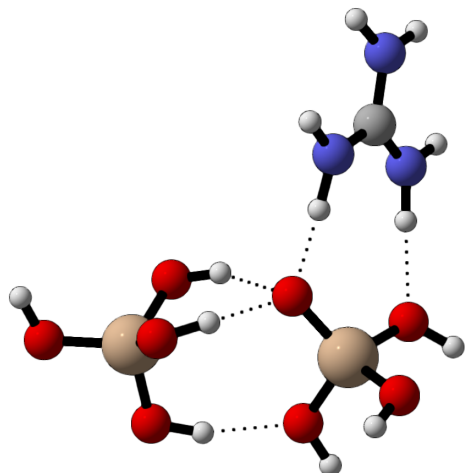

E = -1391.555489  
 H = -1391.336208  
 G = -1391.410083  
 G(quasi-RRHO) = -1391.405708

|    |          |          |          |
|----|----------|----------|----------|
| Si | -0.32859 | 1.73146  | 0.11995  |
| O  | 1.08330  | 2.13830  | -0.66653 |
| H  | 1.18491  | 3.05982  | -0.91561 |
| O  | -0.23947 | 0.22727  | 0.57894  |
| O  | -0.60953 | 2.88056  | 1.26994  |
| H  | 0.09195  | 3.04334  | 1.90338  |
| H  | 1.24344  | -0.33086 | 1.45706  |
| O  | -1.62012 | 1.90877  | -0.90707 |
| H  | -1.97322 | 2.79296  | -1.02564 |
| Si | 2.61691  | -0.96827 | -0.07366 |
| O  | 3.82453  | -2.06417 | -0.14141 |
| H  | 3.65485  | -2.92433 | 0.24651  |
| O  | 3.28032  | 0.35938  | -0.76009 |
| O  | 1.30195  | -1.48474 | -0.90512 |
| H  | 0.52332  | -0.99286 | -0.56809 |
| O  | 2.15538  | -0.69678 | 1.47451  |
| H  | 2.64488  | 1.09315  | -0.81753 |
| H  | -1.61741 | -0.68825 | 0.80901  |
| N  | -2.45434 | -1.30288 | 0.89733  |
| H  | -2.48060 | -1.99141 | 1.62851  |
| C  | -3.41476 | -1.28965 | -0.00949 |
| N  | -4.39599 | -2.19459 | 0.03060  |
| N  | -3.41245 | -0.36769 | -0.96639 |
| H  | -5.13805 | -2.18300 | -0.64520 |
| H  | -4.34941 | -2.97274 | 0.66284  |

|   |          |          |          |
|---|----------|----------|----------|
| H | -4.13793 | -0.36277 | -1.66045 |
| H | -2.76584 | 0.41767  | -0.94196 |

*01\_sg-c.mol2*

E = -1391.555451  
H = -1391.336181  
G = -1391.410047  
G(quasi-RRHO) = -1391.405699

|    |          |          |          |
|----|----------|----------|----------|
| Si | 0.30012  | 1.74070  | 0.12129  |
| O  | -1.09226 | 2.14091  | -0.69276 |
| H  | -1.23704 | 3.07406  | -0.86496 |
| O  | 0.24385  | 0.23988  | 0.59610  |
| O  | 1.61243  | 1.89983  | -0.88965 |
| H  | 1.89604  | 2.78799  | -1.11587 |
| H  | -0.50062 | -1.00527 | -0.54971 |
| O  | 0.39915  | 2.91782  | 1.27285  |
| H  | 1.18637  | 2.92418  | 1.82063  |
| Si | -2.59944 | -0.98403 | -0.07063 |
| O  | -3.79791 | -2.09017 | -0.13368 |
| H  | -3.62098 | -2.94706 | 0.25821  |
| O  | -3.26839 | 0.32877  | -0.77973 |
| O  | -2.15049 | -0.68857 | 1.47638  |
| H  | -1.24089 | -0.31526 | 1.46083  |
| O  | -1.27519 | -1.50222 | -0.88676 |
| H  | -2.64340 | 1.07122  | -0.83628 |
| H  | 1.62439  | -0.67528 | 0.81015  |
| N  | 2.46101  | -1.29053 | 0.89559  |
| H  | 2.49015  | -1.97729 | 1.62832  |
| C  | 3.41984  | -1.27676 | -0.01290 |
| N  | 4.40522  | -2.17778 | 0.02958  |
| N  | 3.41382  | -0.35658 | -0.97112 |
| H  | 5.13488  | -2.17621 | -0.65983 |
| H  | 4.35090  | -2.96473 | 0.65037  |
| H  | 4.13770  | -0.35161 | -1.66686 |
| H  | 2.76400  | 0.42660  | -0.94722 |

*02\_sg-c.mol2*

E = -1391.553292  
H = -1391.333942  
G = -1391.409710  
G(quasi-RRHO) = -1391.404643

|    |          |          |          |
|----|----------|----------|----------|
| Si | 0.29839  | 1.83645  | -0.01045 |
| O  | -1.31498 | 2.21050  | 0.15907  |
| H  | -1.52449 | 3.14690  | 0.18961  |
| O  | 0.45682  | 0.26065  | -0.04624 |
| O  | 0.90589  | 2.60256  | -1.34369 |
| H  | 0.79244  | 2.14788  | -2.18035 |
| H  | -0.71518 | -0.64487 | -1.16385 |
| O  | 1.01442  | 2.61395  | 1.25555  |
| H  | 1.96532  | 2.72691  | 1.20601  |
| Si | -2.48242 | -1.05117 | 0.00611  |
| O  | -3.59261 | -2.24658 | 0.00308  |
| H  | -3.26715 | -3.14652 | -0.05428 |
| O  | -3.39373 | 0.30327  | 0.08612  |
| O  | -1.47066 | -1.17984 | 1.28825  |
| H  | -0.63936 | -0.70761 | 1.06995  |
| O  | -1.56567 | -1.09316 | -1.35208 |
| H  | -2.83799 | 1.10046  | 0.12214  |
| H  | 1.81909  | -0.50031 | -1.06421 |
| H  | 3.10899  | -1.25223 | -2.01401 |
| N  | 2.69818  | -1.01880 | -1.12901 |
| C  | 3.29713  | -1.32168 | 0.01362  |
| N  | 2.70747  | -0.95150 | 1.14195  |
| N  | 4.45142  | -1.98556 | 0.03028  |
| H  | 4.91459  | -2.23807 | -0.82391 |
| H  | 4.92357  | -2.17697 | 0.89540  |
| H  | 1.82644  | -0.44294 | 1.05667  |
| H  | 3.11202  | -1.15605 | 2.03689  |

*03\_sg-c.mol2*

E = -1391.547890  
H = -1391.329006  
G = -1391.405367  
G(quasi-RRHO) = -1391.399979

|    |          |          |          |
|----|----------|----------|----------|
| Si | -2.53053 | -1.01732 | -0.12590 |
| O  | -2.22695 | -0.33791 | 1.37057  |
| H  | -2.77254 | -0.64848 | 2.09635  |
| O  | -1.52312 | -0.41421 | -1.17489 |
| O  | -2.46724 | -2.66746 | 0.01580  |
| H  | -1.61594 | -3.06125 | -0.18320 |
| H  | -0.02547 | -0.11413 | -0.76114 |
| O  | -4.13645 | -0.70172 | -0.35638 |
| H  | -4.55945 | -1.17019 | -1.07807 |
| Si | 0.16487  | 1.85991  | 0.06777  |

|   |          |          |          |
|---|----------|----------|----------|
| O | 1.32431  | 3.00328  | 0.14252  |
| H | 1.72405  | 3.27903  | -0.68426 |
| O | -0.40159 | 1.78426  | 1.59644  |
| O | -0.99160 | 2.25446  | -1.02045 |
| H | -1.42758 | 1.41855  | -1.29999 |
| O | 0.77288  | 0.40086  | -0.40063 |
| H | -1.06673 | 1.08035  | 1.70382  |
| H | 1.84299  | -0.72609 | 0.76358  |
| N | 2.70571  | -1.23642 | 0.92523  |
| H | 2.84516  | -1.74465 | 1.77906  |
| C | 3.64428  | -1.19039 | -0.00970 |
| N | 4.79884  | -1.82959 | 0.15562  |
| N | 3.40905  | -0.49663 | -1.11542 |
| H | 5.51395  | -1.79418 | -0.54814 |
| H | 4.98651  | -2.35163 | 0.99265  |
| H | 4.09327  | -0.43582 | -1.84711 |
| H | 2.51826  | -0.01937 | -1.20338 |

*04\_sg-c.mol2*

E = -1391.549373

H = -1391.330243

G = -1391.405113

G(quasi-RRHO) = -1391.400361

|    |          |          |          |
|----|----------|----------|----------|
| Si | 3.05367  | -0.70100 | 0.07687  |
| O  | 2.88512  | 0.46984  | -1.10540 |
| H  | 3.61963  | 0.56558  | -1.71548 |
| O  | 1.74021  | -0.75297 | 0.94162  |
| O  | 3.45463  | -2.13440 | -0.65357 |
| H  | 2.71250  | -2.69687 | -0.88225 |
| H  | 0.24288  | -0.73979 | 0.24465  |
| O  | 4.44591  | -0.24725 | 0.84445  |
| H  | 4.80585  | -0.87653 | 1.47190  |
| Si | -0.31048 | 1.31274  | -0.00250 |
| O  | -1.78920 | 2.02593  | 0.00978  |
| H  | -1.90325 | 2.81284  | -0.52764 |
| O  | 0.50334  | 1.92338  | -1.27794 |
| O  | 0.46390  | 1.57192  | 1.41092  |
| H  | 1.07980  | 0.81109  | 1.53545  |
| O  | -0.57581 | -0.30022 | -0.13505 |
| H  | 1.39621  | 1.54014  | -1.36402 |
| H  | -2.18348 | -1.11110 | -0.19124 |
| N  | -3.09306 | -1.57733 | -0.23160 |
| H  | -3.11541 | -2.56367 | -0.41916 |

|   |          |          |          |
|---|----------|----------|----------|
| C | -4.22026 | -0.92264 | -0.00261 |
| N | -5.38177 | -1.57560 | 0.01377  |
| N | -4.19750 | 0.38583  | 0.21594  |
| H | -6.24995 | -1.08475 | 0.12693  |
| H | -5.41857 | -2.56867 | -0.12770 |
| H | -5.04988 | 0.87992  | 0.41024  |
| H | -3.33798 | 0.92309  | 0.14756  |

*05\_sg-c.mol2*

E = -1391.550127  
H = -1391.330337  
G = -1391.404702  
G(quasi-RRHO) = -1391.400040

|    |          |          |          |
|----|----------|----------|----------|
| Si | -0.31182 | -0.01340 | 0.10003  |
| O  | 0.53198  | -0.31348 | 1.50786  |
| H  | 0.00854  | -0.48456 | 2.29406  |
| O  | 0.69428  | 0.23656  | -1.07115 |
| O  | -1.39586 | -1.25473 | -0.13427 |
| H  | -1.08966 | -1.95923 | -0.70958 |
| H  | 2.08523  | -0.85676 | -1.27318 |
| O  | -1.41114 | 1.18787  | 0.44497  |
| H  | -1.05254 | 2.01391  | 0.77639  |
| Si | 3.65203  | 0.01718  | -0.10318 |
| O  | 5.28397  | 0.02641  | -0.17907 |
| H  | 5.67762  | 0.20666  | -1.03443 |
| O  | 3.35924  | -0.31724 | 1.47170  |
| O  | 3.02997  | 1.46620  | -0.54704 |
| H  | 2.09386  | 1.30425  | -0.81322 |
| O  | 3.01939  | -1.12064 | -1.09770 |
| H  | 2.40692  | -0.35558 | 1.66592  |
| H  | -3.23771 | -1.16578 | -0.03311 |
| N  | -4.25652 | -1.13037 | -0.03134 |
| H  | -4.76473 | -1.99542 | -0.07470 |
| C  | -4.90149 | 0.02396  | -0.12084 |
| N  | -6.22831 | 0.03952  | -0.24319 |
| N  | -4.22538 | 1.16251  | -0.07692 |
| H  | -6.72813 | 0.90625  | -0.32518 |
| H  | -6.74521 | -0.81268 | -0.36346 |
| H  | -4.71110 | 2.03943  | -0.13598 |
| H  | -3.22031 | 1.17368  | 0.09342  |

06\_sg-c.mol2

E = -1391.548823  
H = -1391.329734  
G = -1391.403428  
G(quasi-RRHO) = -1391.399110

|    |          |          |          |
|----|----------|----------|----------|
| Si | -1.18424 | -1.87843 | -0.06725 |
| O  | -1.84231 | -1.25459 | 1.33667  |
| H  | -2.77204 | -1.45064 | 1.47356  |
| O  | -1.16647 | -0.90051 | -1.29701 |
| O  | 0.38414  | -2.21773 | 0.37762  |
| H  | 0.48686  | -2.76459 | 1.16023  |
| H  | -0.17227 | 0.35963  | -1.03343 |
| O  | -2.02446 | -3.28490 | -0.27416 |
| H  | -2.08949 | -3.60059 | -1.17725 |
| Si | -1.19845 | 1.94998  | -0.01448 |
| O  | -1.06204 | 3.57441  | 0.02239  |
| H  | -0.91155 | 4.01996  | -0.81319 |
| O  | -1.38388 | 1.55664  | 1.56092  |
| O  | -2.46987 | 1.46540  | -0.92463 |
| H  | -2.28850 | 0.54784  | -1.22832 |
| O  | 0.13678  | 1.24535  | -0.66682 |
| H  | -1.55612 | 0.60802  | 1.68736  |
| H  | 1.83709  | 1.09519  | -0.08040 |
| N  | 2.83337  | 1.08465  | 0.15642  |
| H  | 3.28714  | 1.97022  | 0.29747  |
| C  | 3.57217  | -0.00410 | 0.00112  |
| N  | 4.90190  | 0.08202  | 0.02984  |
| N  | 2.99597  | -1.18416 | -0.18720 |
| H  | 5.47464  | -0.74258 | 0.03548  |
| H  | 5.36067  | 0.97279  | 0.08924  |
| H  | 3.57022  | -1.99695 | -0.32408 |
| H  | 2.00418  | -1.34534 | -0.02240 |

07\_sg-c.mol2

E = -1391.547936  
H = -1391.328883  
G = -1391.403323  
G(quasi-RRHO) = -1391.398942

|    |          |         |          |
|----|----------|---------|----------|
| Si | 0.37760  | 1.63298 | 0.00731  |
| O  | -0.98954 | 2.51221 | -0.01646 |
| H  | -1.81433 | 1.99046 | -0.07537 |
| O  | 0.52303  | 0.66468 | 1.33028  |

|    |          |          |          |
|----|----------|----------|----------|
| O  | 0.49004  | 0.61101  | -1.28086 |
| H  | -0.12509 | -0.14057 | -1.05444 |
| H  | -0.09243 | -0.09542 | 1.14839  |
| O  | 1.65167  | 2.64623  | 0.03385  |
| H  | 1.53984  | 3.51707  | -0.35117 |
| Si | -2.67662 | -0.87638 | 0.00199  |
| O  | -3.43840 | -1.55254 | -1.29914 |
| H  | -3.48152 | -2.51027 | -1.31204 |
| O  | -3.08841 | 0.73840  | -0.12389 |
| O  | -3.46289 | -1.53201 | 1.30450  |
| H  | -2.97925 | -1.50175 | 2.13195  |
| O  | -1.10825 | -0.98681 | 0.06265  |
| H  | -4.02330 | 0.95061  | -0.15745 |
| H  | 2.16350  | -0.27255 | 1.19013  |
| N  | 3.03843  | -0.79303 | 1.13941  |
| C  | 3.58764  | -1.13824 | -0.01693 |
| H  | 3.49702  | -1.02740 | 2.00151  |
| N  | 2.99918  | -0.82096 | -1.16121 |
| H  | 2.12113  | -0.30175 | -1.19420 |
| H  | 3.42614  | -1.08093 | -2.03212 |
| N  | 4.73681  | -1.81299 | -0.02770 |
| H  | 5.20887  | -2.04541 | 0.82726  |
| H  | 5.18091  | -2.06560 | -0.89194 |

*08\_sg-c.mol2*

E = -1391.548348  
H = -1391.329286  
G = -1391.401474  
G(quasi-RRHO) = -1391.397523

|    |          |          |          |
|----|----------|----------|----------|
| Si | 2.57761  | -0.36682 | 0.05649  |
| O  | 1.47624  | -1.53689 | -0.39504 |
| H  | 1.85383  | -2.38400 | -0.64404 |
| O  | 1.80652  | 0.89095  | 0.60461  |
| O  | 3.64202  | -1.03651 | 1.13489  |
| H  | 3.40654  | -0.93164 | 2.05850  |
| H  | 0.31709  | 0.76795  | 1.04337  |
| O  | 3.47792  | -0.15348 | -1.31246 |
| H  | 4.26665  | 0.38391  | -1.22080 |
| Si | -1.17472 | 1.91859  | -0.06545 |
| O  | -2.12069 | 3.12856  | 0.49713  |
| H  | -1.67740 | 3.83168  | 0.97519  |
| O  | -2.19012 | 1.18473  | -1.11974 |
| O  | 0.18518  | 2.50465  | -0.74778 |

|   |          |          |          |
|---|----------|----------|----------|
| H | 0.96901  | 2.00995  | -0.39487 |
| O | -0.69497 | 0.86114  | 1.09233  |
| H | -1.95794 | 0.28221  | -1.36223 |
| H | -0.36335 | -1.62174 | -0.68218 |
| N | -1.32240 | -1.87628 | -0.93343 |
| H | -1.40854 | -2.38707 | -1.79726 |
| C | -2.17031 | -2.19625 | 0.05744  |
| N | -3.14647 | -3.06834 | -0.15749 |
| N | -2.02707 | -1.60794 | 1.23241  |
| H | -3.87673 | -3.20736 | 0.51860  |
| H | -3.18810 | -3.60018 | -1.00860 |
| H | -2.66135 | -1.82814 | 1.98050  |
| H | -1.48376 | -0.74013 | 1.29269  |

TS1-g, Si-O bond association

*00\_sg-d.mol2*

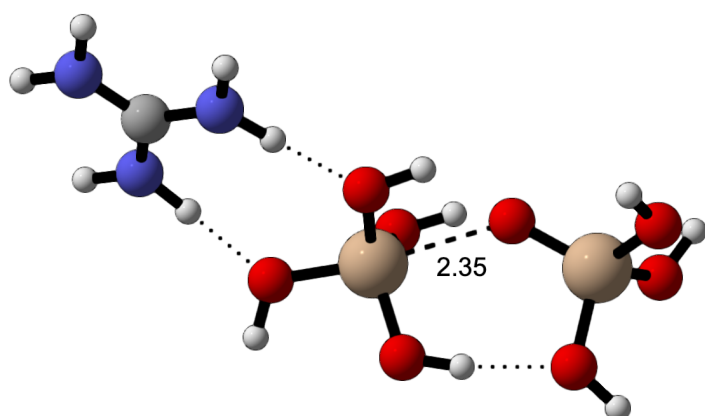

E = -1391.543945  
H = -1391.325161  
G = -1391.397953  
G(quasi-RRHO) = -1391.393710

|    |          |          |          |
|----|----------|----------|----------|
| Si | 0.16273  | -0.89952 | 0.03545  |
| O  | -0.68089 | -1.43194 | -1.26102 |
| H  | -1.59739 | -1.12726 | -1.35579 |
| O  | 0.77065  | 0.64285  | 0.00290  |
| O  | -0.24350 | -1.48842 | 1.51793  |
| H  | -1.02580 | -1.00065 | 1.80648  |
| H  | 0.03581  | 1.23037  | 0.23300  |
| O  | 1.61557  | -1.70338 | -0.23067 |
| H  | 1.55790  | -2.42380 | -0.86042 |



|    |          |          |          |
|----|----------|----------|----------|
| Si | -3.17234 | 0.53405  | 0.04398  |
| O  | -4.37760 | -0.12332 | 0.96357  |
| H  | -4.70710 | 0.42077  | 1.68084  |
| O  | -3.23974 | -0.34787 | -1.36714 |
| O  | -3.68882 | 2.08436  | -0.22306 |
| H  | -2.99651 | 2.71213  | -0.43758 |
| O  | -1.69546 | 0.43057  | 0.57647  |
| H  | -4.10172 | -0.57930 | -1.71666 |
| H  | 2.48952  | 1.19367  | -0.13014 |
| N  | 3.46302  | 1.50271  | -0.17502 |
| H  | 3.65116  | 2.48370  | -0.27886 |
| C  | 4.46176  | 0.64791  | -0.00967 |
| N  | 5.72051  | 1.08799  | 0.02839  |
| N  | 4.20829  | -0.64684 | 0.10875  |
| H  | 6.48510  | 0.45135  | 0.16301  |
| H  | 5.92370  | 2.07084  | 0.04088  |
| H  | 4.96326  | -1.29511 | 0.24202  |
| H  | 3.26150  | -1.01739 | -0.00753 |

*01\_sg-d.mol2*

E = -1391.541320  
H = -1391.322386  
G = -1391.394444  
G(quasi-RRHO) = -1391.390639

|    |          |          |          |
|----|----------|----------|----------|
| Si | -0.21237 | 1.19237  | -0.02056 |
| O  | 1.07545  | 2.19970  | 0.01230  |
| H  | 1.95753  | 1.79761  | 0.02622  |
| O  | -0.65577 | 0.42084  | -1.42347 |
| O  | -0.58828 | 0.34726  | 1.36506  |
| H  | 0.04799  | -0.37916 | 1.42269  |
| H  | -0.03135 | -0.31067 | -1.53129 |
| O  | -1.47005 | 2.29034  | -0.03163 |
| H  | -1.40338 | 2.98984  | 0.61943  |
| Si | 2.85161  | -0.70988 | -0.00837 |
| O  | 3.46420  | -1.34473 | 1.38740  |
| H  | 3.48477  | -2.30145 | 1.44475  |
| O  | 3.50351  | 0.81973  | -0.06338 |
| O  | 3.50586  | -1.66371 | -1.19116 |
| H  | 3.02249  | -1.67843 | -2.01913 |
| O  | 1.28969  | -0.53719 | -0.11563 |
| H  | 4.41431  | 0.93616  | 0.21166  |
| H  | -2.37380 | -0.23857 | -1.20162 |
| N  | -3.32538 | -0.60347 | -1.13881 |

|   |          |          |          |
|---|----------|----------|----------|
| C | -3.91609 | -0.84948 | 0.02167  |
| H | -3.82867 | -0.75212 | -1.99521 |
| N | -3.26954 | -0.65752 | 1.16235  |
| H | -2.31332 | -0.29963 | 1.19609  |
| H | -3.73472 | -0.83767 | 2.03422  |
| N | -5.16995 | -1.30375 | 0.04099  |
| H | -5.69057 | -1.42006 | -0.80921 |
| H | -5.64686 | -1.46866 | 0.90853  |

*02\_sg-d.mol2*

E = -1391.539611  
H = -1391.320456  
G = -1391.391949  
G(quasi-RRHO) = -1391.388208

|    |          |          |          |
|----|----------|----------|----------|
| Si | -0.81927 | 1.81974  | 0.05930  |
| O  | -0.62474 | 1.18935  | 1.56387  |
| H  | -0.91970 | 0.27891  | 1.69406  |
| O  | 0.19107  | 1.27096  | -1.15900 |
| O  | -2.29696 | 2.39278  | -0.41286 |
| H  | -2.84101 | 1.64114  | -0.67141 |
| H  | -0.22779 | 0.49069  | -1.54284 |
| O  | -0.04870 | 3.27147  | 0.39312  |
| H  | -0.07388 | 3.90087  | -0.32862 |
| Si | -1.54431 | -1.57895 | -0.05080 |
| O  | -2.65607 | -2.69827 | -0.52590 |
| H  | -3.55076 | -2.37475 | -0.64620 |
| O  | -1.36601 | -1.56717 | 1.59893  |
| O  | -0.10227 | -2.20833 | -0.59596 |
| H  | -0.14001 | -2.68732 | -1.42690 |
| O  | -1.84612 | -0.10080 | -0.49451 |
| H  | -0.96679 | -2.33371 | 2.01453  |
| H  | 1.89315  | 0.80730  | -0.77003 |
| N  | 2.89140  | 0.67072  | -0.58867 |
| H  | 3.50373  | 1.45023  | -0.75127 |
| C  | 3.38107  | -0.44314 | -0.06839 |
| N  | 4.67538  | -0.51207 | 0.24866  |
| N  | 2.60204  | -1.49775 | 0.13220  |
| H  | 5.06097  | -1.34119 | 0.66292  |
| H  | 5.25469  | 0.30763  | 0.22311  |
| H  | 2.99014  | -2.33268 | 0.53405  |
| H  | 1.63766  | -1.54573 | -0.18703 |

IM1-g, three equatorial OH groups

*00\_sg-e.mol2*

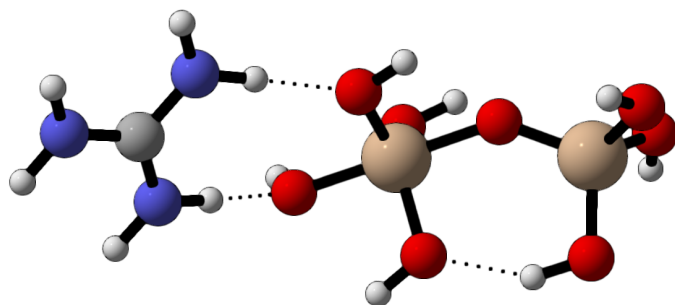

E = -1391.555324

H = -1391.335128

G = -1391.407820

G(quasi-RRHO) = -1391.403292

|    |          |          |          |
|----|----------|----------|----------|
| Si | -0.10698 | 0.68794  | -0.25969 |
| O  | -0.48200 | 0.80944  | 1.38797  |
| H  | 0.17147  | 1.34390  | 1.84362  |
| O  | 0.77618  | -0.66526 | -0.76049 |
| O  | -0.55159 | 1.87396  | -1.36623 |
| H  | -1.40347 | 1.67796  | -1.75981 |
| H  | 0.18582  | -1.39606 | -0.95766 |
| O  | 1.40563  | 1.55939  | 0.02049  |
| H  | 1.48223  | 2.30591  | -0.57554 |
| Si | -3.03319 | -0.50205 | 0.13090  |
| O  | -3.01506 | -0.01979 | 1.69780  |
| H  | -2.13543 | 0.35234  | 1.90007  |
| O  | -3.44108 | -2.08819 | -0.01060 |
| O  | -4.30957 | 0.19757  | -0.63456 |
| H  | -4.46596 | 1.12137  | -0.43225 |
| O  | -1.61585 | -0.19972 | -0.55124 |
| H  | -2.73953 | -2.71959 | 0.15648  |
| H  | 2.52631  | -0.98296 | -0.75777 |
| H  | 3.87428  | -2.01707 | -1.17405 |
| N  | 3.52733  | -1.20109 | -0.70265 |
| C  | 4.32520  | -0.51428 | 0.10247  |
| N  | 5.59483  | -0.89515 | 0.26901  |
| N  | 3.85938  | 0.55523  | 0.72733  |
| H  | 6.19762  | -0.40300 | 0.90310  |
| H  | 5.91523  | -1.77690 | -0.08796 |
| H  | 4.46978  | 1.08754  | 1.32104  |

H 2.92861 0.93768 0.48803

*01\_sg-e.mol2*

E = -1391.556188

H = -1391.335751

G = -1391.406437

G(quasi-RRHO) = -1391.402882

Si -0.23126 1.04568 -0.21730

O -0.71752 1.25691 1.39488

H 0.00568 1.61041 1.91698

O 0.47241 -0.44902 -0.58491

O -0.41442 2.25922 -1.36736

H -1.27816 2.20524 -1.78045

H -0.17747 -1.14778 -0.71729

O 1.37704 1.68222 0.14582

H 1.52176 2.50974 -0.31558

Si -2.76347 -0.67290 0.08070

O -2.88143 -0.41191 1.69507

H -2.16679 0.19457 1.96075

O -2.03119 -2.10977 -0.26681

O -4.27740 -0.78689 -0.53695

H -4.90968 -0.12519 -0.25014

O -1.85807 0.44645 -0.61638

H -2.32145 -2.89466 0.20106

H 2.85342 0.90344 0.53278

N 3.75565 0.42910 0.70591

H 4.45419 0.88687 1.26351

C 4.05797 -0.68663 0.06152

N 5.27601 -1.22303 0.17689

N 3.13827 -1.27481 -0.68995

H 5.52489 -2.05010 -0.33453

H 6.01201 -0.72372 0.64218

H 3.35051 -2.13758 -1.15770

H 2.16480 -0.94703 -0.67521

*02\_sg-e.mol2*

E = -1391.555685

H = -1391.334986

G = -1391.405126

G(quasi-RRHO) = -1391.401424

Si 0.15995 -0.36367 0.00557

|    |          |          |          |
|----|----------|----------|----------|
| O  | 0.71329  | -1.02144 | -1.45624 |
| H  | 0.10612  | -1.65644 | -1.83903 |
| O  | 0.73034  | -1.06629 | 1.43954  |
| O  | -0.87978 | 0.96681  | 0.03100  |
| H  | -0.36402 | 1.77647  | 0.04021  |
| H  | 0.12674  | -1.71114 | 1.81133  |
| O  | -1.30166 | -1.37221 | -0.00145 |
| H  | -1.13033 | -2.31598 | -0.01264 |
| Si | 3.09918  | 0.36364  | 0.00632  |
| O  | 3.45234  | -0.46133 | -1.37290 |
| H  | 2.63041  | -0.83406 | -1.73191 |
| O  | 3.47005  | -0.49006 | 1.35900  |
| O  | 4.09414  | 1.66488  | 0.07092  |
| H  | 4.26914  | 2.10525  | -0.76249 |
| O  | 1.53369  | 0.73325  | 0.01500  |
| H  | 2.65325  | -0.87590 | 1.71486  |
| H  | -2.63413 | 1.21071  | 0.04187  |
| N  | -3.64681 | 1.37255  | 0.04228  |
| H  | -3.98837 | 2.31604  | 0.07220  |
| C  | -4.49806 | 0.35874  | -0.00151 |
| N  | -5.81312 | 0.58919  | 0.00051  |
| N  | -4.03570 | -0.88097 | -0.03742 |
| H  | -6.46844 | -0.16623 | -0.08148 |
| H  | -6.17288 | 1.52567  | -0.03107 |
| H  | -4.67466 | -1.65514 | -0.07147 |
| H  | -3.02219 | -1.06558 | -0.02448 |

*03\_sg-e.mol2*

E = -1391.554342

H = -1391.333501

G = -1391.402361

G(quasi-RRHO) = -1391.399250

|    |          |          |          |
|----|----------|----------|----------|
| Si | -1.12918 | -1.30081 | 0.00606  |
| O  | -2.02470 | -0.84031 | 1.37306  |
| H  | -2.59485 | -1.54196 | 1.69159  |
| O  | -1.74036 | -0.86179 | -1.51545 |
| O  | 0.37496  | -2.05679 | 0.16140  |
| H  | 0.25207  | -3.00992 | 0.16125  |
| H  | -2.23827 | -1.56904 | -1.92872 |
| O  | -1.85586 | -2.90382 | -0.05283 |
| H  | -2.80951 | -2.92881 | -0.14290 |
| Si | -0.97609 | 1.72392  | -0.00466 |
| O  | -2.01493 | 1.92024  | 1.25016  |

|   |          |          |          |
|---|----------|----------|----------|
| H | -2.25640 | 1.04311  | 1.59413  |
| O | -1.69788 | 1.91137  | -1.46344 |
| O | 0.14145  | 2.92174  | 0.07241  |
| H | 0.33002  | 3.26578  | 0.94753  |
| O | -0.29339 | 0.25956  | 0.07667  |
| H | -1.88044 | 1.03125  | -1.83320 |
| H | 1.50032  | 0.49599  | 0.03934  |
| N | 2.48809  | 0.76305  | 0.00757  |
| H | 2.71196  | 1.73908  | -0.06646 |
| C | 3.44419  | -0.15228 | 0.00880  |
| N | 4.72494  | 0.21192  | -0.06477 |
| N | 3.11378  | -1.43254 | 0.08409  |
| H | 5.45939  | -0.47154 | -0.03750 |
| H | 4.98363  | 1.18116  | -0.09600 |
| H | 3.82277  | -2.14314 | 0.07684  |
| H | 2.12595  | -1.70058 | 0.11760  |

*04\_sg-e.mol2*

E = -1391.550417

H = -1391.329920

G = -1391.401756

G(quasi-RRHO) = -1391.397711

|    |          |          |          |
|----|----------|----------|----------|
| Si | -1.45977 | -1.23303 | 0.05151  |
| O  | -2.73666 | -0.39235 | -0.68866 |
| H  | -3.33952 | -1.01772 | -1.09645 |
| O  | -0.06245 | -1.48409 | -0.88138 |
| O  | -1.54714 | -1.77008 | 1.64519  |
| H  | -1.22608 | -1.09586 | 2.24673  |
| H  | -0.13812 | -2.33645 | -1.31897 |
| O  | -2.13269 | -2.76190 | -0.50197 |
| H  | -2.29259 | -3.35673 | 0.23095  |
| Si | -0.72670 | 1.80724  | 0.10028  |
| O  | -2.09484 | 2.21224  | -0.70313 |
| H  | -2.59318 | 1.39330  | -0.88973 |
| O  | 0.60698  | 1.98283  | -0.86546 |
| O  | -0.48606 | 2.90274  | 1.30139  |
| H  | -1.24425 | 3.10297  | 1.85355  |
| O  | -0.76889 | 0.29907  | 0.61332  |
| H  | 0.75215  | 2.85396  | -1.24204 |
| H  | 1.56403  | -1.26943 | -0.20686 |
| N  | 2.51509  | -1.36859 | 0.17026  |
| H  | 2.76111  | -2.25464 | 0.57482  |
| C  | 3.46307  | -0.46977 | -0.03854 |

|   |         |          |          |
|---|---------|----------|----------|
| N | 4.72654 | -0.74345 | 0.29154  |
| N | 3.16210 | 0.70854  | -0.56812 |
| H | 5.45444 | -0.06589 | 0.15409  |
| H | 4.99674 | -1.67099 | 0.56493  |
| H | 3.88650 | 1.39046  | -0.70600 |
| H | 2.19883 | 1.02351  | -0.66903 |

*05\_sg-e.mol2*

E = -1391.550418  
H = -1391.329918  
G = -1391.401726  
G(quasi-RRHO) = -1391.397694

|    |          |          |          |
|----|----------|----------|----------|
| Si | -1.46135 | -1.23195 | 0.05157  |
| O  | -2.73634 | -0.38974 | -0.69026 |
| H  | -3.33908 | -1.01442 | -1.09926 |
| O  | -0.06315 | -1.48549 | -0.87927 |
| O  | -1.55266 | -1.76788 | 1.64545  |
| H  | -1.23198 | -1.09366 | 2.24719  |
| H  | -0.13918 | -2.33820 | -1.31613 |
| O  | -2.13459 | -2.76049 | -0.50238 |
| H  | -2.30438 | -3.35156 | 0.23136  |
| Si | -0.72486 | 1.80733  | 0.10019  |
| O  | -2.09361 | 2.21489  | -0.70084 |
| H  | -2.59256 | 1.39665  | -0.88872 |
| O  | 0.60728  | 1.98034  | -0.86809 |
| O  | -0.48006 | 2.90225  | 1.30091  |
| H  | -1.23586 | 3.10114  | 1.85683  |
| O  | -0.76902 | 0.29931  | 0.61354  |
| H  | 0.75075  | 2.84968  | -1.24942 |
| H  | 2.19923  | 1.02192  | -0.66898 |
| H  | 3.88682  | 1.38949  | -0.70357 |
| N  | 3.16247  | 0.70731  | -0.56668 |
| C  | 3.46335  | -0.47159 | -0.03842 |
| N  | 4.72672  | -0.74538 | 0.29212  |
| N  | 2.51547  | -1.37082 | 0.16911  |
| H  | 4.99704  | -1.67349 | 0.56348  |
| H  | 5.45489  | -0.06839 | 0.15322  |
| H  | 2.76159  | -2.25732 | 0.57263  |
| H  | 1.56404  | -1.27100 | -0.20694 |

*06\_sg-e.mol2*

E = -1391.549277

H = -1391.328136  
G = -1391.398394  
G(quasi-RRHO) = -1391.394538

|    |          |          |          |
|----|----------|----------|----------|
| Si | 1.44479  | -1.16066 | -0.12243 |
| O  | 1.75425  | -0.62904 | 1.45834  |
| H  | 2.15504  | -1.33634 | 1.96801  |
| O  | -0.10929 | -1.80930 | -0.40581 |
| O  | 2.59299  | -1.04693 | -1.34975 |
| H  | 2.51826  | -0.20720 | -1.80654 |
| H  | -0.04363 | -2.76843 | -0.38396 |
| O  | 2.03837  | -2.76901 | 0.27080  |
| H  | 2.79759  | -2.99906 | -0.26527 |
| Si | 0.53648  | 1.87752  | 0.05888  |
| O  | 0.80877  | 1.87919  | 1.67698  |
| H  | 1.17395  | 1.01037  | 1.93017  |
| O  | -0.99192 | 2.36655  | -0.28995 |
| O  | 1.44034  | 3.07452  | -0.62113 |
| H  | 2.32274  | 3.18434  | -0.26277 |
| O  | 0.80564  | 0.42373  | -0.55226 |
| H  | -1.57848 | 1.65186  | -0.56121 |
| H  | -1.50999 | -0.71592 | -1.17269 |
| H  | -2.90995 | -0.07331 | -1.96294 |
| N  | -2.42737 | -0.27405 | -1.10253 |
| C  | -3.15617 | -0.61838 | -0.03019 |
| N  | -4.44431 | -0.31040 | 0.03094  |
| N  | -2.54939 | -1.23168 | 0.96985  |
| H  | -4.98766 | -0.52055 | 0.84936  |
| H  | -4.88259 | 0.22230  | -0.69936 |
| H  | -3.03831 | -1.46136 | 1.81653  |
| H  | -1.58338 | -1.51736 | 0.83597  |

*07\_sg-e.mol2*

E = -1391.546571  
H = -1391.326209  
G = -1391.397829  
G(quasi-RRHO) = -1391.394280

|    |          |          |          |
|----|----------|----------|----------|
| Si | -0.02936 | 1.02690  | -0.00468 |
| O  | -1.10797 | 2.24273  | -0.42571 |
| H  | -2.02976 | 1.98067  | -0.34531 |
| O  | 0.73309  | 0.85480  | 1.50139  |
| O  | 0.31780  | -0.16160 | -1.16825 |
| H  | -0.31413 | -0.88721 | -1.18067 |



|    |          |          |          |
|----|----------|----------|----------|
| H  | 0.20350  | 0.28975  | 2.06806  |
| O  | 1.33079  | 1.97353  | -0.48905 |
| H  | 1.19333  | 2.37383  | -1.34803 |
| Si | -2.70691 | -0.65845 | 0.11658  |
| O  | -2.41405 | -1.69183 | -1.13282 |
| H  | -2.39188 | -2.62805 | -0.92480 |
| O  | -3.62425 | 0.57414  | -0.47367 |
| O  | -3.50206 | -1.55499 | 1.23454  |
| H  | -3.57343 | -1.19291 | 2.11978  |
| O  | -1.38106 | 0.01311  | 0.67945  |
| H  | -4.43562 | 0.35958  | -0.93766 |
| H  | 2.42059  | 0.26124  | 1.18471  |
| N  | 3.37550  | -0.10452 | 1.12005  |
| C  | 3.83609  | -0.70739 | 0.03541  |
| H  | 3.99210  | 0.05229  | 1.89687  |
| N  | 3.04944  | -0.91560 | -1.00903 |
| H  | 2.07665  | -0.59417 | -1.03627 |
| H  | 3.42302  | -1.36297 | -1.82708 |
| N  | 5.11309  | -1.10306 | -0.00920 |
| H  | 5.69472  | -1.04450 | 0.80708  |
| H  | 5.44763  | -1.65831 | -0.77553 |

*08\_sg-e.mol2*

E = -1391.548476

H = -1391.327250

G = -1391.397008

G(quasi-RRHO) = -1391.393506

|    |          |          |          |
|----|----------|----------|----------|
| Si | -0.31109 | 0.84983  | 0.01433  |
| O  | -0.72719 | 0.70867  | 1.65463  |
| H  | 0.03710  | 0.61385  | 2.22523  |
| O  | 0.06283  | -0.56148 | -0.84221 |
| O  | -0.26162 | 2.35606  | -0.71920 |
| H  | 0.62438  | 2.71864  | -0.74903 |
| H  | 0.98085  | -0.82556 | -0.77180 |
| O  | 1.46048  | 0.96383  | 0.45937  |
| H  | 1.65000  | 1.72055  | 1.02082  |
| Si | -2.97504 | -0.53056 | -0.12385 |
| O  | -3.13760 | -0.70229 | 1.50492  |
| H  | -2.38009 | -0.27148 | 1.93479  |
| O  | -2.40758 | -1.89402 | -0.84281 |
| O  | -4.47866 | -0.34756 | -0.75118 |
| H  | -5.08827 | 0.18522  | -0.23767 |
| O  | -1.98205 | 0.69524  | -0.43136 |

|   |          |          |          |
|---|----------|----------|----------|
| H | -1.46009 | -1.77755 | -1.01903 |
| H | 4.49047  | 0.74108  | -1.63952 |
| H | 3.03037  | 0.87361  | -0.67021 |
| N | 3.93248  | 0.44278  | -0.86056 |
| C | 4.35397  | -0.50593 | -0.03494 |
| N | 3.58032  | -0.84547 | 0.98746  |
| N | 5.52623  | -1.10337 | -0.22818 |
| H | 3.85397  | -1.56536 | 1.63076  |
| H | 2.69621  | -0.35298 | 1.09987  |
| H | 5.84256  | -1.83185 | 0.38621  |
| H | 6.10244  | -0.86773 | -1.01585 |

*09\_sg-e.mol2*

E = -1391.549182

H = -1391.328027

G = -1391.396938

G(quasi-RRHO) = -1391.393974

|    |          |          |          |
|----|----------|----------|----------|
| Si | -1.77712 | -0.93666 | -0.03610 |
| O  | -1.86225 | -2.68543 | -0.02276 |
| H  | -2.76590 | -2.99332 | -0.09724 |
| O  | -1.16563 | -0.89011 | 1.54694  |
| O  | -3.42170 | -0.85855 | -0.38028 |
| H  | -3.70779 | 0.05346  | -0.45931 |
| H  | -1.07885 | -1.78282 | 1.88868  |
| O  | -0.55717 | -1.00907 | -1.24015 |
| H  | -0.50641 | -1.90842 | -1.57585 |
| Si | -0.41933 | 1.77808  | 0.09064  |
| O  | 0.61932  | 1.49506  | -1.17692 |
| H  | 0.30685  | 0.70547  | -1.64902 |
| O  | 0.31536  | 1.47039  | 1.52131  |
| O  | -0.73790 | 3.38173  | 0.11956  |
| H  | -0.87936 | 3.80892  | -0.72718 |
| O  | -1.69898 | 0.83422  | -0.09809 |
| H  | -0.01510 | 0.62144  | 1.86317  |
| H  | 1.26652  | -1.12397 | -0.41821 |
| H  | 2.14940  | -2.35883 | 0.40288  |
| N  | 2.14164  | -1.44711 | -0.01804 |
| C  | 3.25615  | -0.72893 | -0.06783 |
| N  | 3.23208  | 0.50253  | -0.55383 |
| N  | 4.39661  | -1.25328 | 0.37767  |
| H  | 5.24586  | -0.71812 | 0.37870  |
| H  | 4.45125  | -2.21964 | 0.64474  |
| H  | 4.08048  | 1.03565  | -0.62406 |

H 2.34575 0.95296 -0.78147

*10\_sg-e.mol2*

E = -1391.548423

H = -1391.327310

G = -1391.395508

G(quasi-RRHO) = -1391.392578

|    |          |          |          |
|----|----------|----------|----------|
| Si | -0.13191 | 0.87202  | 0.19650  |
| O  | 0.71972  | 0.56264  | 1.63230  |
| H  | 1.38398  | 1.23306  | 1.80446  |
| O  | 0.16311  | -0.08159 | -1.17241 |
| O  | -1.27172 | 2.12076  | 0.12151  |
| H  | -0.94180 | 2.91202  | -0.30754 |
| H  | 0.76375  | 0.34401  | -1.78771 |
| O  | 1.19376  | 1.94796  | -0.38601 |
| H  | 1.29357  | 2.78577  | 0.07082  |
| Si | -2.69345 | -0.67327 | -0.05597 |
| O  | -3.64134 | -1.71802 | 0.77822  |
| H  | -3.39666 | -2.64369 | 0.72864  |
| O  | -2.28965 | -1.39828 | -1.47686 |
| O  | -3.64764 | 0.64544  | -0.27384 |
| H  | -3.10028 | 1.44213  | -0.18814 |
| O  | -1.35236 | -0.24231 | 0.71930  |
| H  | -1.38428 | -1.13504 | -1.71065 |
| H  | 2.73963  | 1.03405  | -0.46100 |
| N  | 3.60600  | 0.49465  | -0.58935 |
| C  | 3.81276  | -0.67500 | -0.00308 |
| H  | 4.29604  | 0.85763  | -1.22324 |
| N  | 2.91781  | -1.17337 | 0.83960  |
| H  | 3.09525  | -2.04775 | 1.30025  |
| H  | 2.09332  | -0.64252 | 1.11493  |
| N  | 4.93220  | -1.35672 | -0.25211 |
| H  | 5.07862  | -2.26690 | 0.14567  |
| H  | 5.57419  | -1.04998 | -0.96003 |

TS2-cg, water cleavage of IM1, C(NH<sub>2</sub>)<sub>3</sub><sup>+</sup> acting as catalyst

*00\_cg-h.mol2*

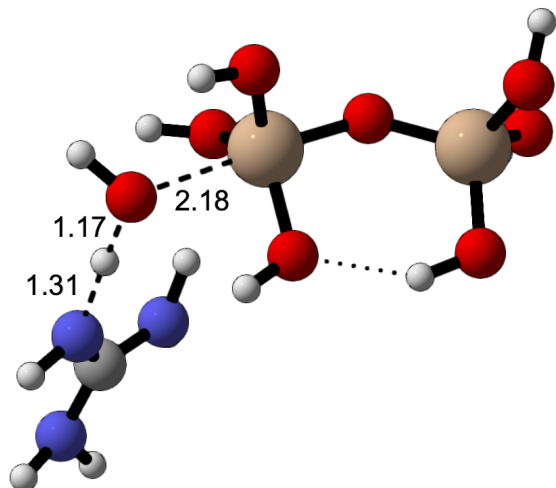

E = -1391.531709  
 H = -1391.316587  
 G = -1391.387248  
 G(quasi-RRHO) = -1391.383260

|    |          |          |          |
|----|----------|----------|----------|
| Si | -0.21170 | 0.98208  | 0.24876  |
| O  | 0.60767  | 0.56600  | 1.63204  |
| H  | 1.36196  | 1.13064  | 1.80961  |
| O  | 0.12441  | 0.12436  | -1.13599 |
| O  | -0.84588 | 2.49581  | 0.11623  |
| H  | -0.24807 | 3.14881  | -0.24990 |
| H  | 0.84263  | 0.47488  | -1.66629 |
| O  | 1.67227  | 1.92495  | -0.30971 |
| H  | 1.97225  | 2.71857  | 0.14212  |
| Si | -2.77151 | -0.67993 | -0.09617 |
| O  | -3.35587 | -1.82947 | 0.91501  |
| H  | -2.71287 | -2.33874 | 1.41209  |
| O  | -2.18695 | -1.33007 | -1.47510 |
| O  | -4.07508 | 0.21048  | -0.52910 |
| H  | -4.64843 | 0.51851  | 0.17516  |
| O  | -1.62075 | 0.17177  | 0.64564  |
| H  | -1.30004 | -0.98667 | -1.67060 |
| H  | 2.57918  | 1.18916  | -0.40849 |
| N  | 3.57911  | 0.35610  | -0.58867 |
| C  | 3.75973  | -0.81404 | -0.04437 |
| H  | 4.33451  | 0.65285  | -1.18836 |
| N  | 2.80351  | -1.37166 | 0.72405  |
| H  | 3.04384  | -2.14563 | 1.31733  |
| H  | 2.01116  | -0.81178 | 1.00801  |
| N  | 4.90148  | -1.52841 | -0.20437 |

|   |         |          |          |
|---|---------|----------|----------|
| H | 4.88521 | -2.51514 | -0.01192 |
| H | 5.53804 | -1.24422 | -0.92804 |

TS2-sg, water cleavage of IM1, C(NH<sub>2</sub>)<sub>3</sub><sup>+</sup> acting as spectator  
*00\_sg-h.mol2*

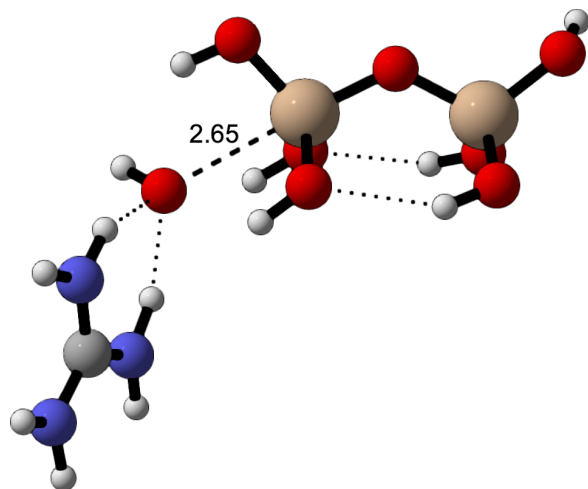

|               |                |
|---------------|----------------|
| E             | = -1391.535124 |
| H             | = -1391.317929 |
| G             | = -1391.391791 |
| G(quasi-RRHO) | = -1391.386611 |

|    |          |          |          |
|----|----------|----------|----------|
| Si | -0.62424 | 0.93122  | -0.13542 |
| O  | -0.53809 | 0.78294  | 1.49991  |
| H  | 0.41663  | 0.84791  | 1.70056  |
| O  | 0.08183  | -0.33608 | -0.91851 |
| O  | -0.25508 | 2.39712  | -0.74807 |
| H  | 0.68497  | 2.55422  | -0.58376 |
| H  | 1.02724  | -0.39324 | -0.75138 |
| O  | 1.91150  | 1.20444  | 0.57701  |
| H  | 2.22216  | 1.99911  | 1.01975  |
| Si | -3.08747 | -0.60786 | -0.05185 |
| O  | -3.01521 | -0.78252 | 1.57322  |
| H  | -2.23223 | -0.37343 | 1.96701  |
| O  | -2.50096 | -1.89509 | -0.86921 |
| O  | -4.64583 | -0.50794 | -0.50197 |
| H  | -5.24274 | -0.03476 | 0.08089  |
| O  | -2.21742 | 0.71201  | -0.46341 |
| H  | -1.56706 | -1.81038 | -1.09701 |
| H  | 4.50234  | 0.45950  | -1.76035 |
| H  | 3.19771  | 0.85277  | -0.59929 |

|   |         |          |          |
|---|---------|----------|----------|
| N | 4.00156 | 0.27968  | -0.90963 |
| C | 4.43768 | -0.61261 | -0.03060 |
| N | 3.75430 | -0.74683 | 1.09717  |
| N | 5.52377 | -1.34796 | -0.27263 |
| H | 4.05478 | -1.37872 | 1.81627  |
| H | 2.96081 | -0.09483 | 1.21729  |
| H | 5.79756 | -2.07953 | 0.35795  |
| H | 5.99245 | -1.29322 | -1.15865 |

*01\_sg-h.mol2*

E = -1391.533275  
H = -1391.317034  
G = -1391.388596  
G(quasi-RRHO) = -1391.384416

|    |          |          |          |
|----|----------|----------|----------|
| Si | -0.44739 | 0.81651  | -0.39220 |
| O  | -0.69051 | 1.44559  | 1.11125  |
| H  | 0.19830  | 1.71253  | 1.41029  |
| O  | 0.41233  | -0.59706 | -0.38027 |
| O  | -0.04720 | 1.80067  | -1.63018 |
| H  | 0.85104  | 2.11398  | -1.45135 |
| H  | -0.15062 | -1.37134 | -0.25401 |
| O  | 1.76949  | 1.72322  | 0.32974  |
| H  | 1.92286  | 2.67103  | 0.37414  |
| Si | -2.98270 | -0.55974 | 0.11423  |
| O  | -3.21737 | 0.13632  | 1.57315  |
| H  | -2.46873 | 0.69107  | 1.83727  |
| O  | -2.20832 | -2.00387 | 0.20583  |
| O  | -4.42711 | -0.81672 | -0.58784 |
| H  | -5.08377 | -0.12009 | -0.52508 |
| O  | -1.99055 | 0.35220  | -0.78728 |
| H  | -2.54117 | -2.66756 | 0.81327  |
| H  | 4.76987  | 0.90886  | 1.15311  |
| N  | 3.99880  | 0.48074  | 0.67048  |
| H  | 3.05740  | 1.02692  | 0.54512  |
| C  | 4.19846  | -0.68485 | 0.09921  |
| N  | 3.20296  | -1.27895 | -0.55875 |
| N  | 5.38807  | -1.30562 | 0.17795  |
| H  | 3.33465  | -2.19963 | -0.93660 |
| H  | 2.24981  | -0.92958 | -0.48291 |
| H  | 5.56176  | -2.12864 | -0.37118 |
| H  | 6.19424  | -0.78914 | 0.48136  |

*02\_sg-h.mol2*

E = -1391.527741  
H = -1391.310273  
G = -1391.382810  
G(quasi-RRHO) = -1391.378546

|    |          |          |          |
|----|----------|----------|----------|
| Si | -1.29758 | -1.07026 | 0.25149  |
| O  | -2.39781 | -0.79312 | -0.94572 |
| H  | -2.56967 | -1.69480 | -1.29649 |
| O  | 0.13690  | -1.69380 | -0.26531 |
| O  | -1.89109 | -1.74524 | 1.62287  |
| H  | -2.14071 | -2.66010 | 1.46313  |
| H  | -0.14603 | -2.57446 | -0.61307 |
| O  | -1.75898 | -3.24067 | -0.82468 |
| H  | -2.13134 | -4.05521 | -0.48381 |
| Si | -0.96966 | 1.90305  | 0.04739  |
| O  | -2.18810 | 1.95643  | -1.03427 |
| H  | -2.49008 | 1.07043  | -1.29584 |
| O  | 0.50744  | 2.12352  | -0.63770 |
| O  | -1.14887 | 3.11851  | 1.11893  |
| H  | -2.03341 | 3.28573  | 1.45074  |
| O  | -0.90198 | 0.45056  | 0.75487  |
| H  | 0.66851  | 2.95785  | -1.08477 |
| H  | 3.23696  | -2.06987 | 0.83895  |
| N  | 2.83264  | -1.26917 | 0.38641  |
| H  | 1.84090  | -1.31812 | 0.13712  |
| C  | 3.62120  | -0.28700 | -0.01873 |
| N  | 3.10760  | 0.80073  | -0.57989 |
| N  | 4.94138  | -0.38575 | 0.13366  |
| H  | 3.71985  | 1.53127  | -0.89706 |
| H  | 2.11754  | 1.01801  | -0.54224 |
| H  | 5.54718  | 0.38332  | -0.08835 |
| H  | 5.36305  | -1.24131 | 0.44664  |

*03\_sg-h.mol2*

E = -1391.527741  
H = -1391.310272  
G = -1391.382800  
G(quasi-RRHO) = -1391.378542

|    |          |          |          |
|----|----------|----------|----------|
| Si | -1.29749 | -1.07020 | 0.25135  |
| O  | -2.39860 | -0.79246 | -0.94493 |
| H  | -2.57105 | -1.69390 | -1.29589 |
| O  | 0.13664  | -1.69352 | -0.26675 |

|    |          |          |          |
|----|----------|----------|----------|
| O  | -1.89000 | -1.74539 | 1.62308  |
| H  | -2.13986 | -2.66017 | 1.46324  |
| H  | -0.14663 | -2.57403 | -0.61451 |
| O  | -1.75974 | -3.24000 | -0.82459 |
| H  | -2.13155 | -4.05472 | -0.48356 |
| Si | -0.96920 | 1.90303  | 0.04758  |
| O  | -2.18888 | 1.95713  | -1.03266 |
| H  | -2.49122 | 1.07127  | -1.29433 |
| O  | 0.50722  | 2.12276  | -0.63923 |
| O  | -1.14658 | 3.11853  | 1.11937  |
| H  | -2.03061 | 3.28599  | 1.45242  |
| O  | -0.90141 | 0.45048  | 0.75490  |
| H  | 0.66800  | 2.95674  | -1.08704 |
| H  | 3.23604  | -2.06956 | 0.84023  |
| N  | 2.83199  | -1.26930 | 0.38668  |
| H  | 1.84042  | -1.31849 | 0.13671  |
| C  | 3.62072  | -0.28741 | -0.01882 |
| N  | 3.10729  | 0.79982  | -0.58112 |
| N  | 4.94082  | -0.38594 | 0.13425  |
| H  | 3.71965  | 1.53015  | -0.89855 |
| H  | 2.11724  | 1.01720  | -0.54376 |
| H  | 5.54659  | 0.38323  | -0.08747 |
| H  | 5.36242  | -1.24115 | 0.44825  |

TS-iso-g, isomerization of IM1 to IM2

*00\_sg-f.mol2*

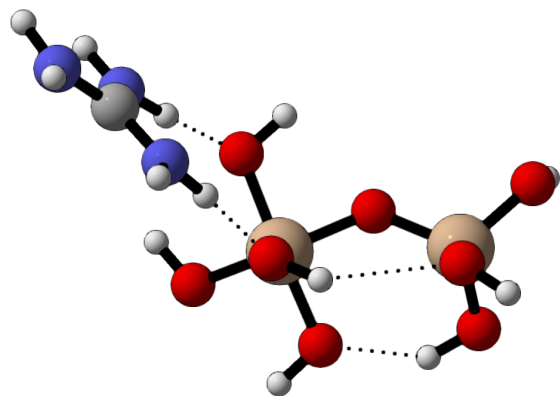

|               |                |
|---------------|----------------|
| E             | = -1391.543912 |
| H             | = -1391.324855 |
| G             | = -1391.393955 |
| G(quasi-RRHO) | = -1391.390685 |



|    |          |          |          |
|----|----------|----------|----------|
| Si | 0.19929  | 0.99645  | 0.02853  |
| O  | -0.55242 | 2.52396  | -0.04110 |
| H  | -1.27550 | 2.59379  | 0.58369  |
| O  | -0.53695 | -0.00005 | -1.12649 |
| O  | -0.86111 | 0.63105  | 1.38070  |
| H  | -0.50156 | -0.10616 | 1.87814  |
| H  | 0.10701  | -0.52369 | -1.61303 |
| O  | 1.48677  | 1.67351  | -0.93704 |
| H  | 1.19727  | 2.47229  | -1.38044 |
| Si | 2.68176  | -0.70809 | 0.15788  |
| O  | 3.78961  | 0.38328  | -0.35461 |
| H  | 3.28848  | 1.14024  | -0.70839 |
| O  | 2.11889  | -1.65540 | -1.06565 |
| O  | 3.42606  | -1.70968 | 1.21852  |
| H  | 3.98590  | -1.30146 | 1.88163  |
| O  | 1.38334  | 0.00189  | 0.79412  |
| H  | 2.76966  | -2.05546 | -1.64564 |
| H  | -2.54561 | 0.26795  | 1.13435  |
| N  | -3.54513 | 0.03426  | 1.03204  |
| H  | -4.17095 | 0.25634  | 1.78527  |
| C  | -3.99575 | -0.63669 | -0.01632 |
| N  | -5.28493 | -0.98048 | -0.08621 |
| N  | -3.17036 | -0.95621 | -1.00252 |
| H  | -5.62557 | -1.54474 | -0.84319 |
| H  | -5.89801 | -0.83148 | 0.69468  |
| H  | -3.52402 | -1.42831 | -1.81544 |
| H  | -2.19782 | -0.62763 | -1.01418 |

*01\_sg-f.mol2*

E = -1391.544128  
H = -1391.324805  
G = -1391.393554  
G(quasi-RRHO) = -1391.390007

|    |          |          |          |
|----|----------|----------|----------|
| Si | 0.24713  | 1.05621  | -0.05339 |
| O  | -1.32540 | 1.68390  | -0.37839 |
| H  | -1.28393 | 2.63952  | -0.45277 |
| O  | 0.43940  | 0.92933  | 1.62827  |
| O  | 0.82764  | 2.65980  | -0.32947 |
| H  | 1.77398  | 2.65805  | -0.47724 |
| H  | 0.66173  | 1.77886  | 2.01604  |
| O  | -0.47255 | -0.49241 | -0.33886 |
| H  | 0.15811  | -1.19647 | -0.51729 |
| Si | 2.70703  | -0.70165 | -0.09343 |

|   |          |          |          |
|---|----------|----------|----------|
| O | 2.01538  | -2.11280 | -0.60386 |
| H | 2.31360  | -2.93028 | -0.19991 |
| O | 2.78764  | -0.62255 | 1.53723  |
| O | 4.25996  | -0.61373 | -0.59715 |
| H | 4.45519  | -0.94922 | -1.47394 |
| O | 1.76694  | 0.45967  | -0.68265 |
| H | 2.02009  | -0.13393 | 1.88483  |
| H | -2.92915 | 0.99845  | -0.41846 |
| N | -3.87385 | 0.58889  | -0.39867 |
| H | -4.66789 | 1.17882  | -0.57063 |
| C | -4.05588 | -0.66670 | -0.01880 |
| N | -5.29258 | -1.15898 | 0.09856  |
| N | -3.00436 | -1.43121 | 0.23024  |
| H | -5.44444 | -2.09339 | 0.43217  |
| H | -6.09218 | -0.55804 | 0.01508  |
| H | -3.13532 | -2.39134 | 0.49335  |
| H | -2.04936 | -1.08526 | 0.04532  |

*O2\_sg-f.mol2*

E = -1391.543710  
H = -1391.324220  
G = -1391.393295  
G(quasi-RRHO) = -1391.389756

|    |          |          |          |
|----|----------|----------|----------|
| Si | 0.16023  | -0.61469 | -0.00778 |
| O  | -1.31176 | -1.45165 | -0.31641 |
| H  | -1.12482 | -2.37655 | -0.49049 |
| O  | 0.46851  | -0.59952 | 1.66105  |
| O  | -0.80540 | 0.82279  | -0.09752 |
| H  | -0.24423 | 1.58865  | -0.22637 |
| H  | 0.74218  | -1.46629 | 1.96971  |
| O  | 0.96275  | -2.08319 | -0.44602 |
| H  | 1.90662  | -1.97607 | -0.58998 |
| Si | 2.95659  | 0.52148  | -0.10930 |
| O  | 3.75471  | -0.87331 | -0.48483 |
| H  | 4.61746  | -1.01834 | -0.09149 |
| O  | 2.93345  | 0.80879  | 1.50117  |
| O  | 3.73792  | 1.81242  | -0.74085 |
| H  | 4.13135  | 1.70252  | -1.60827 |
| O  | 1.46961  | 0.32583  | -0.68164 |
| H  | 2.13195  | 0.42374  | 1.89437  |
| H  | -2.49694 | 1.18477  | -0.07852 |
| N  | -3.50531 | 1.40216  | -0.06375 |
| H  | -3.79948 | 2.36006  | -0.00085 |

|   |          |          |          |
|---|----------|----------|----------|
| C | -4.40827 | 0.43464  | -0.07213 |
| N | -5.70959 | 0.72746  | 0.00404  |
| N | -4.01320 | -0.82704 | -0.14729 |
| H | -6.40404 | 0.00758  | -0.07876 |
| H | -6.02276 | 1.68098  | 0.00556  |
| H | -4.69186 | -1.56690 | -0.13978 |
| H | -3.01282 | -1.06240 | -0.20383 |

*03\_sg-f.mol2*

E = -1391.542680  
H = -1391.322967  
G = -1391.390920  
G(quasi-RRHO) = -1391.387748

|    |          |          |          |
|----|----------|----------|----------|
| Si | 1.05993  | -1.41090 | 0.00766  |
| O  | 1.37998  | -2.72294 | 1.07298  |
| H  | 2.10015  | -3.26305 | 0.74444  |
| O  | -0.23360 | -1.93318 | -0.95285 |
| O  | 2.46405  | -1.86961 | -0.86794 |
| H  | 2.70498  | -1.19290 | -1.50188 |
| H  | -0.12286 | -2.82344 | -1.29108 |
| O  | 0.16934  | -0.70726 | 1.35572  |
| H  | 0.09310  | -1.36419 | 2.05275  |
| Si | 1.15032  | 1.72559  | -0.10302 |
| O  | 1.28605  | 1.79201  | 1.53222  |
| H  | 0.96297  | 0.95259  | 1.89962  |
| O  | -0.22123 | 2.46187  | -0.62661 |
| O  | 2.29582  | 2.68298  | -0.77587 |
| H  | 3.20880  | 2.45023  | -0.59925 |
| O  | 1.24332  | 0.19923  | -0.59569 |
| H  | -1.03933 | 2.04994  | -0.33033 |
| H  | -2.65410 | 1.09116  | 1.55930  |
| H  | -1.44134 | -0.00251 | 1.00479  |
| N  | -2.31160 | 0.51228  | 0.81002  |
| C  | -3.21128 | -0.01586 | -0.02915 |
| N  | -4.45439 | 0.45787  | -0.04668 |
| N  | -2.85144 | -0.98628 | -0.84745 |
| H  | -3.50811 | -1.34147 | -1.51988 |
| H  | -1.88810 | -1.34486 | -0.86531 |
| H  | -5.12106 | 0.13230  | -0.72357 |
| H  | -4.71867 | 1.23377  | 0.53324  |

04\_sg-f.mol2

E = -1391.534745

H = -1391.315243

G = -1391.385902

G(quasi-RRHO) = -1391.381776

|    |          |          |          |
|----|----------|----------|----------|
| Si | 1.30619  | -1.33930 | 0.00548  |
| O  | 1.64538  | -2.70591 | 1.00273  |
| H  | 2.41062  | -3.18220 | 0.67778  |
| O  | 0.09656  | -1.86673 | -1.05281 |
| O  | 2.78606  | -1.66064 | -0.80742 |
| H  | 3.02158  | -0.92714 | -1.37705 |
| H  | 0.33067  | -2.66339 | -1.53049 |
| O  | 0.33478  | -0.76137 | 1.35024  |
| H  | 0.28823  | -1.45124 | 2.01655  |
| Si | 1.00764  | 1.79917  | -0.06967 |
| O  | 0.85149  | 1.88443  | 1.56168  |
| H  | 0.66360  | 0.98405  | 1.88394  |
| O  | -0.36000 | 2.27249  | -0.85054 |
| O  | 2.06526  | 2.95478  | -0.55142 |
| H  | 2.89278  | 3.00170  | -0.06976 |
| O  | 1.44297  | 0.31623  | -0.50187 |
| H  | -1.05137 | 1.60499  | -0.88773 |
| H  | -1.48780 | -0.38055 | 0.71726  |
| H  | -1.66937 | -0.99763 | -0.82857 |
| N  | -2.07568 | -0.40049 | -0.11402 |
| C  | -3.38878 | -0.21830 | -0.03225 |
| N  | -4.17411 | -0.55007 | -1.05055 |
| N  | -3.91917 | 0.31794  | 1.06054  |
| H  | -5.15438 | -0.33160 | -1.04310 |
| H  | -3.78300 | -0.92209 | -1.89752 |
| H  | -4.90443 | 0.50149  | 1.12585  |
| H  | -3.33543 | 0.59750  | 1.82851  |

IM2-g, co-linear OH groups on Si

00\_sg-g.mol2

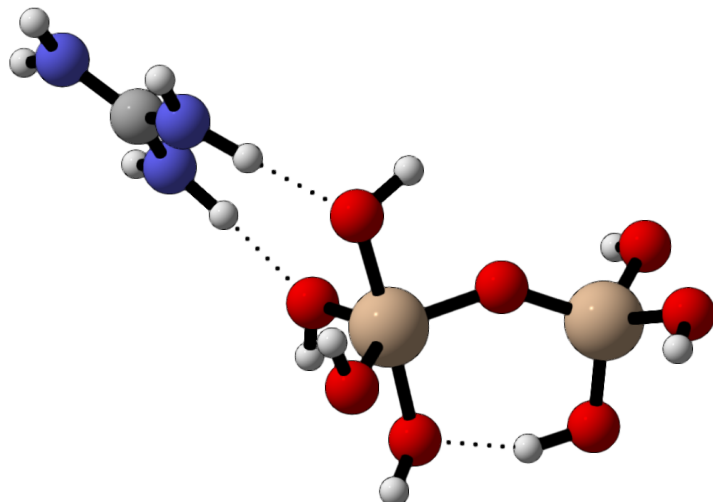

E = -1391.552207  
 H = -1391.332218  
 G = -1391.404506  
 G(quasi-RRHO) = -1391.400061

|    |          |          |          |
|----|----------|----------|----------|
| Si | -0.15697 | 0.81598  | 0.07012  |
| O  | 0.89748  | 0.43208  | -1.19961 |
| H  | 0.59851  | 0.85539  | -2.00817 |
| O  | 0.01820  | 2.23969  | 0.95207  |
| O  | -1.36215 | -0.31433 | 0.39559  |
| H  | 0.55528  | 2.08629  | 1.73179  |
| O  | 0.92273  | -0.01788 | 1.20152  |
| H  | 0.53314  | -0.84676 | 1.48302  |
| H  | 4.18618  | -0.29485 | 1.95537  |
| H  | 2.62790  | -0.13690 | 1.15576  |
| O  | -1.18834 | 1.72203  | -1.07130 |
| H  | -1.19550 | 2.65332  | -0.84450 |
| Si | -2.89737 | -0.66788 | 0.02810  |
| O  | -3.06429 | -2.21296 | -0.49196 |
| H  | -2.74819 | -2.40171 | -1.37709 |
| O  | -3.43843 | 0.38983  | -1.08696 |
| H  | -2.71655 | 1.04828  | -1.24402 |
| O  | -3.83211 | -0.70355 | 1.37450  |
| H  | -3.82990 | 0.08486  | 1.91996  |
| N  | 3.65533  | -0.24985 | 1.10394  |
| C  | 4.24000  | -0.54024 | -0.04738 |
| N  | 3.52875  | -0.52592 | -1.16552 |
| N  | 5.53698  | -0.85899 | -0.08544 |
| H  | 2.55372  | -0.20518 | -1.16592 |
| H  | 3.97274  | -0.72907 | -2.04296 |

|   |         |          |          |
|---|---------|----------|----------|
| H | 6.09671 | -0.82468 | 0.74703  |
| H | 6.01466 | -0.95683 | -0.96281 |

*01\_sg-g.mol2*

E = -1391.552193  
H = -1391.332227  
G = -1391.404344  
G(quasi-RRHO) = -1391.400073

|    |          |          |          |
|----|----------|----------|----------|
| Si | -0.16231 | 0.83265  | -0.06836 |
| O  | -1.19888 | 1.71486  | 1.08702  |
| H  | -1.21409 | 2.64895  | 0.87245  |
| O  | 0.92240  | 0.02236  | -1.21196 |
| O  | 0.00379  | 2.27085  | -0.92828 |
| H  | 0.54273  | 2.13290  | -1.70961 |
| H  | 0.53259  | -0.79916 | -1.51403 |
| O  | 0.89443  | 0.43594  | 1.19550  |
| H  | 0.59359  | 0.84576  | 2.01029  |
| Si | -2.88528 | -0.68313 | -0.03006 |
| O  | -3.85954 | -0.72912 | -1.34747 |
| H  | -4.13887 | 0.11661  | -1.70192 |
| O  | -3.43997 | 0.36809  | 1.08424  |
| O  | -2.98716 | -2.24027 | 0.47180  |
| H  | -2.40315 | -2.49985 | 1.18636  |
| O  | -1.36040 | -0.30025 | -0.41081 |
| H  | -2.72184 | 1.02862  | 1.25022  |
| H  | 2.62738  | -0.10671 | -1.15917 |
| N  | 3.65377  | -0.22770 | -1.10563 |
| H  | 4.18723  | -0.26081 | -1.95597 |
| C  | 4.23215  | -0.54250 | 0.04246  |
| N  | 5.52700  | -0.86985 | 0.07975  |
| N  | 3.51635  | -0.54431 | 1.15781  |
| H  | 6.00025  | -0.98824 | 0.95698  |
| H  | 6.09047  | -0.82311 | -0.74960 |
| H  | 3.95581  | -0.76446 | 2.03342  |
| H  | 2.54398  | -0.21547 | 1.15997  |

*02\_sg-g.mol2*

E = -1391.548614  
H = -1391.328694  
G = -1391.402452  
G(quasi-RRHO) = -1391.397516

|    |          |          |          |
|----|----------|----------|----------|
| Si | 0.26885  | 1.15857  | 0.17233  |
| O  | 1.46273  | 1.74966  | -1.04074 |
| H  | 1.29292  | 2.62512  | -1.39179 |
| O  | -0.98856 | 0.66448  | 1.28593  |
| O  | 0.60974  | 2.46126  | 1.18971  |
| H  | 1.38536  | 2.94520  | 0.90172  |
| H  | -0.78254 | 0.93021  | 2.18291  |
| O  | -0.92358 | 1.11067  | -1.03691 |
| H  | -0.53647 | 1.24292  | -1.90449 |
| Si | 2.51635  | -0.99522 | -0.05719 |
| O  | 3.43376  | -1.38028 | 1.24642  |
| H  | 3.60267  | -0.67578 | 1.87426  |
| O  | 3.32845  | -0.08028 | -1.13677 |
| O  | 2.22143  | -2.48715 | -0.67076 |
| H  | 1.91839  | -2.52018 | -1.57958 |
| O  | 1.16369  | -0.24164 | 0.39620  |
| H  | 2.81197  | 0.74332  | -1.29250 |
| H  | -2.32531 | -0.37812 | 1.11392  |
| N  | -3.18588 | -0.93220 | 0.96229  |
| H  | -3.48740 | -1.58264 | 1.66545  |
| C  | -3.97363 | -0.66680 | -0.06678 |
| N  | -5.15592 | -1.27582 | -0.18841 |
| N  | -3.57743 | 0.20442  | -0.98467 |
| H  | -5.76381 | -1.07046 | -0.96017 |
| H  | -5.51561 | -1.85094 | 0.55123  |
| H  | -4.16075 | 0.39067  | -1.78051 |
| H  | -2.61712 | 0.56606  | -0.98075 |

*03\_sg-g.mol2*

E = -1391.550904  
H = -1391.330890  
G = -1391.402303  
G(quasi-RRHO) = -1391.398575

|    |          |          |          |
|----|----------|----------|----------|
| Si | -0.18588 | 0.71586  | 0.06707  |
| O  | -0.11837 | 2.34656  | -0.34300 |
| H  | 0.46729  | 2.48082  | -1.09070 |
| O  | 0.89359  | 0.11096  | 1.22475  |
| O  | 0.97206  | 0.32076  | -1.20878 |
| H  | 0.62920  | -0.38190 | -1.76285 |
| H  | 0.53466  | 0.23097  | 2.10703  |
| O  | -1.37516 | 1.11513  | 1.33065  |
| H  | -1.35407 | 2.04416  | 1.56476  |
| Si | -2.83890 | -0.60198 | -0.16675 |

|   |          |          |          |
|---|----------|----------|----------|
| O | -3.75482 | 0.72075  | -0.50810 |
| H | -3.39711 | 1.53373  | -0.14134 |
| O | -2.99582 | -1.11314 | 1.38232  |
| O | -3.49259 | -1.83971 | -1.01588 |
| H | -3.57388 | -1.72274 | -1.96366 |
| O | -1.29122 | -0.37421 | -0.60246 |
| H | -2.52863 | -0.49746 | 1.96209  |
| H | 2.68441  | 0.25037  | -1.12724 |
| N | 3.71215  | 0.15134  | -1.06910 |
| H | 4.27780  | 0.41704  | -1.85533 |
| C | 4.26878  | -0.47090 | -0.04219 |
| N | 5.57998  | -0.72530 | -0.03818 |
| N | 3.51776  | -0.83127 | 0.98894  |
| H | 6.00731  | -1.21411 | 0.72728  |
| H | 6.13398  | -0.57136 | -0.86087 |
| H | 3.93915  | -1.28255 | 1.78086  |
| H | 2.54349  | -0.51620 | 1.06114  |

*04\_sg-g.mol2*

E = -1391.548889

H = -1391.328555

G = -1391.398363

G(quasi-RRHO) = -1391.395026

|    |          |          |          |
|----|----------|----------|----------|
| Si | -0.67365 | 1.50396  | -0.03360 |
| O  | -1.64517 | 2.39477  | 1.01045  |
| H  | -2.19129 | 2.99789  | 0.50146  |
| O  | 0.88641  | 2.08459  | -0.37510 |
| O  | -1.31982 | 2.33784  | -1.43401 |
| H  | -1.67993 | 1.72126  | -2.07129 |
| H  | 0.85154  | 2.60932  | -1.17938 |
| O  | 0.00517  | 0.64577  | 1.38440  |
| H  | 0.23831  | 1.25861  | 2.08511  |
| Si | -1.56958 | -1.44062 | -0.09901 |
| O  | -1.76293 | -1.38127 | 1.52344  |
| H  | -1.18411 | -0.67166 | 1.86547  |
| O  | -0.38950 | -2.48577 | -0.56540 |
| O  | -2.94906 | -2.02060 | -0.76304 |
| H  | -3.77533 | -1.66624 | -0.42879 |
| O  | -1.14467 | 0.00673  | -0.66865 |
| H  | -0.58127 | -3.42056 | -0.46448 |
| H  | 2.54045  | 1.40019  | -0.04387 |
| N  | 3.38261  | 0.81920  | 0.00506  |
| H  | 4.26339  | 1.21323  | -0.27473 |



|   |         |          |          |
|---|---------|----------|----------|
| C | 3.22601 | -0.50032 | 0.02633  |
| N | 4.21521 | -1.30728 | -0.35713 |
| N | 2.08048 | -1.00337 | 0.45816  |
| H | 4.17070 | -2.29442 | -0.17922 |
| H | 5.05222 | -0.93810 | -0.77010 |
| H | 1.80311 | -1.93837 | 0.20893  |
| H | 1.34976 | -0.37246 | 0.81009  |

*05\_sg-g.mol2*

E = -1391.543953

H = -1391.323776

G = -1391.397858

G(quasi-RRHO) = -1391.392978

|    |          |          |          |
|----|----------|----------|----------|
| Si | -0.29670 | 1.03399  | -0.12034 |
| O  | 0.51667  | 1.23816  | -1.57455 |
| H  | 1.37110  | 0.80502  | -1.57349 |
| O  | -0.13322 | 2.17098  | 1.11319  |
| O  | 1.13497  | 0.11037  | 0.52451  |
| H  | 0.81953  | -0.54165 | 1.15512  |
| H  | 0.62948  | 1.97525  | 1.65979  |
| O  | -1.67666 | 1.93458  | -0.74084 |
| H  | -1.61209 | 2.86532  | -0.52405 |
| Si | -2.76656 | -0.85102 | 0.09735  |
| O  | -2.92486 | -2.19577 | -0.82743 |
| H  | -2.56780 | -2.14919 | -1.71589 |
| O  | -3.73003 | 0.36789  | -0.39461 |
| O  | -3.24971 | -1.42918 | 1.55361  |
| H  | -3.47716 | -0.77475 | 2.21618  |
| O  | -1.22970 | -0.34958 | 0.11270  |
| H  | -3.14647 | 1.14367  | -0.58536 |
| H  | 4.60854  | 0.95279  | 1.28930  |
| H  | 2.92781  | 0.56349  | 0.92770  |
| N  | 3.92648  | 0.38554  | 0.82004  |
| C  | 4.28881  | -0.62739 | 0.04604  |
| N  | 5.57247  | -0.93307 | -0.12224 |
| N  | 3.33897  | -1.32888 | -0.56039 |
| H  | 6.29369  | -0.39499 | 0.32275  |
| H  | 5.85141  | -1.67911 | -0.73338 |
| H  | 2.37222  | -1.07006 | -0.37445 |
| H  | 3.55739  | -2.13759 | -1.11309 |

06\_sg-g.mol2

E = -1391.545881  
H = -1391.326117  
G = -1391.397579  
G(quasi-RRHO) = -1391.393887

|    |          |          |          |
|----|----------|----------|----------|
| Si | 1.01422  | -1.38369 | 0.03857  |
| O  | 1.65837  | -2.15859 | -1.31436 |
| H  | 0.99566  | -2.62522 | -1.82514 |
| O  | 1.08046  | -2.12263 | 1.54721  |
| O  | -0.62116 | -2.02950 | -0.29456 |
| H  | -0.64504 | -2.98909 | -0.31229 |
| H  | 0.25620  | -2.55996 | 1.76645  |
| O  | 2.58551  | -0.62604 | 0.31078  |
| H  | 3.31237  | -1.15130 | -0.02556 |
| Si | 1.18360  | 1.56755  | -0.03571 |
| O  | 2.12931  | 1.73743  | -1.36564 |
| H  | 2.73008  | 0.99658  | -1.48684 |
| O  | 1.95798  | 1.80603  | 1.38667  |
| O  | 0.11147  | 2.80757  | -0.09469 |
| H  | -0.10307 | 3.14856  | -0.96460 |
| O  | 0.33462  | 0.17198  | -0.05192 |
| H  | 2.50293  | 1.03246  | 1.58077  |
| H  | -1.45707 | 0.59971  | 0.06400  |
| N  | -2.40957 | 0.95559  | 0.14631  |
| H  | -2.53364 | 1.94496  | 0.26349  |
| C  | -3.44986 | 0.14679  | 0.00717  |
| N  | -4.69170 | 0.63377  | 0.05883  |
| N  | -3.24007 | -1.14367 | -0.19296 |
| H  | -5.48477 | 0.01895  | 0.03413  |
| H  | -4.85629 | 1.59794  | 0.28407  |
| H  | -4.01544 | -1.77287 | -0.29645 |
| H  | -2.27537 | -1.50522 | -0.23823 |

07\_sg-g.mol2

E = -1391.550916  
H = -1391.330266  
G = -1391.397401  
G(quasi-RRHO) = -1391.394773

|    |          |         |          |
|----|----------|---------|----------|
| Si | 0.80258  | 1.44400 | -0.01165 |
| O  | -0.36463 | 1.49954 | 1.22016  |
| H  | 0.07641  | 1.48786 | 2.07364  |
| O  | -0.52363 | 1.78438 | -1.14374 |

|    |          |          |          |
|----|----------|----------|----------|
| O  | 2.04443  | 1.20628  | 1.24495  |
| H  | 2.81677  | 1.74561  | 1.06840  |
| H  | -0.30215 | 1.45525  | -2.01792 |
| O  | 1.06245  | -0.06278 | -0.71933 |
| O  | 1.70299  | 2.74309  | -0.58693 |
| Si | 1.40541  | -1.55135 | -0.18725 |
| O  | 2.18918  | -2.45034 | -1.31009 |
| O  | 2.30703  | -1.43118 | 1.16871  |
| H  | 2.38557  | -0.47474 | 1.39737  |
| O  | 0.03038  | -2.41229 | 0.04189  |
| H  | -0.74524 | -1.90915 | 0.31607  |
| H  | 3.13557  | -2.31213 | -1.37712 |
| H  | 1.23365  | 3.21497  | -1.27706 |
| H  | -1.60833 | 0.21308  | 1.17079  |
| H  | -2.59944 | -1.03143 | 1.83661  |
| C  | -3.25028 | -0.26547 | 0.08987  |
| N  | -2.31175 | -0.52105 | 1.01726  |
| N  | -4.39003 | -0.94976 | 0.09799  |
| N  | -3.01074 | 0.65042  | -0.82682 |
| H  | -4.56610 | -1.65120 | 0.79456  |
| H  | -5.07183 | -0.83140 | -0.63000 |
| H  | -2.08339 | 1.11086  | -0.89355 |
| H  | -3.67968 | 0.80718  | -1.56039 |

*08\_sg-g.mol2*

E = -1391.545268  
H = -1391.324986  
G = -1391.395477  
G(quasi-RRHO) = -1391.391939

|    |          |          |          |
|----|----------|----------|----------|
| Si | 1.48582  | -1.22317 | -0.02800 |
| O  | 2.23758  | -1.89651 | 1.32447  |
| H  | 3.11580  | -2.19846 | 1.08324  |
| O  | 0.48317  | -2.17830 | -0.98467 |
| O  | 2.89889  | -1.57971 | -1.01265 |
| H  | 3.17383  | -0.81286 | -1.51497 |
| H  | 0.99693  | -2.53758 | -1.71132 |
| O  | 0.07817  | -0.86163 | 1.03600  |
| H  | 0.06641  | -1.48658 | 1.76471  |
| Si | 0.83875  | 1.77503  | -0.00262 |
| O  | 0.40162  | 1.75988  | 1.56784  |
| H  | 0.17937  | 0.83315  | 1.78287  |
| O  | -0.55451 | 1.99664  | -0.86023 |
| O  | 1.76264  | 3.08446  | -0.32580 |

|   |          |          |          |
|---|----------|----------|----------|
| H | 2.68810  | 3.03878  | -0.07814 |
| O | 1.59997  | 0.42107  | -0.43199 |
| H | -0.48024 | 2.02121  | -1.81720 |
| H | -1.51807 | -1.08556 | 0.26699  |
| N | -2.48849 | -1.30364 | -0.00236 |
| H | -2.74397 | -2.27285 | -0.07147 |
| C | -3.43506 | -0.38231 | -0.04686 |
| N | -4.71835 | -0.74072 | -0.10745 |
| N | -3.11164 | 0.90713  | -0.03292 |
| H | -5.44295 | -0.05503 | -0.21883 |
| H | -4.99293 | -1.69514 | 0.03948  |
| H | -3.83896 | 1.59950  | -0.06294 |
| H | -2.16788 | 1.21271  | -0.25719 |

*09\_sg-g.mol2*

E = -1391.545268

H = -1391.324983

G = -1391.395455

G(quasi-RRHO) = -1391.391922

|    |          |          |          |
|----|----------|----------|----------|
| Si | 1.48612  | -1.22298 | -0.02796 |
| O  | 2.23914  | -1.89392 | 1.32496  |
| H  | 3.11758  | -2.19518 | 1.08361  |
| O  | 0.48443  | -2.18036 | -0.98340 |
| O  | 2.89923  | -1.57897 | -1.01290 |
| H  | 3.17422  | -0.81195 | -1.51494 |
| H  | 0.99859  | -2.53944 | -1.70988 |
| O  | 0.07832  | -0.86192 | 1.03603  |
| H  | 0.06648  | -1.48714 | 1.76452  |
| Si | 0.83807  | 1.77511  | -0.00295 |
| O  | 0.40176  | 1.75950  | 1.56775  |
| H  | 0.17960  | 0.83274  | 1.78270  |
| O  | -0.55563 | 1.99763  | -0.85980 |
| O  | 1.76218  | 3.08440  | -0.32593 |
| H  | 2.68760  | 3.03886  | -0.07809 |
| O  | 1.59820  | 0.42096  | -0.43354 |
| H  | -0.48153 | 2.02139  | -1.81683 |
| H  | -1.51790 | -1.08566 | 0.26675  |
| N  | -2.48816 | -1.30395 | -0.00294 |
| H  | -2.74336 | -2.27323 | -0.07215 |
| C  | -3.43502 | -0.38285 | -0.04685 |
| N  | -4.71816 | -0.74155 | -0.10769 |
| N  | -3.11190 | 0.90671  | -0.03236 |
| H  | -5.44298 | -0.05574 | -0.21688 |

|   |          |          |          |
|---|----------|----------|----------|
| H | -4.99258 | -1.69595 | 0.03961  |
| H | -3.83948 | 1.59882  | -0.06230 |
| H | -2.16825 | 1.21268  | -0.25670 |

*10\_sg-g.mol2*

E = -1391.545268  
H = -1391.324979  
G = -1391.395422  
G(quasi-RRHO) = -1391.391896

|    |          |          |          |
|----|----------|----------|----------|
| Si | 1.48613  | -1.22289 | -0.02793 |
| O  | 0.07856  | -0.86225 | 1.03645  |
| H  | 0.06705  | -1.48747 | 1.76494  |
| O  | 0.48453  | -2.18094 | -0.98280 |
| O  | 2.24008  | -1.89278 | 1.32497  |
| H  | 3.11863  | -2.19354 | 1.08340  |
| H  | 0.99867  | -2.54039 | -1.70911 |
| O  | 2.89915  | -1.57858 | -1.01313 |
| H  | 3.17286  | -0.81195 | -1.51646 |
| Si | 0.83757  | 1.77519  | -0.00312 |
| O  | 1.76229  | 3.08410  | -0.32597 |
| H  | 2.68801  | 3.03734  | -0.07951 |
| O  | 0.40153  | 1.75903  | 1.56763  |
| O  | -0.55627 | 1.99875  | -0.85942 |
| H  | -0.48245 | 2.02348  | -1.81644 |
| O  | 1.59705  | 0.42090  | -0.43434 |
| H  | 0.17991  | 0.83207  | 1.78244  |
| H  | -1.51752 | -1.08584 | 0.26694  |
| N  | -2.48766 | -1.30411 | -0.00323 |
| H  | -2.74265 | -2.27338 | -0.07331 |
| C  | -3.43465 | -0.38316 | -0.04677 |
| N  | -4.71770 | -0.74208 | -0.10888 |
| N  | -3.11171 | 0.90645  | -0.03093 |
| H  | -5.44268 | -0.05605 | -0.21575 |
| H  | -4.99208 | -1.69634 | 0.03955  |
| H  | -3.83941 | 1.59840  | -0.06149 |
| H  | -2.16822 | 1.21267  | -0.25563 |

*11\_sg-g.mol2*

E = -1391.545972  
H = -1391.325476  
G = -1391.395285  
G(quasi-RRHO) = -1391.391914

|    |          |          |          |
|----|----------|----------|----------|
| Si | 1.01980  | -1.33047 | -0.13413 |
| O  | 2.50420  | -0.66085 | -0.80093 |
| H  | 3.28606  | -1.09869 | -0.46231 |
| O  | 1.85264  | -1.61108 | 1.32002  |
| O  | 0.92697  | -2.41593 | -1.41115 |
| H  | 0.10717  | -2.91270 | -1.41108 |
| H  | 1.27278  | -1.97179 | 1.99391  |
| O  | -0.50760 | -1.93852 | 0.57044  |
| H  | -0.51931 | -2.88484 | 0.73000  |
| Si | 1.11737  | 1.56463  | 0.10614  |
| O  | 0.10344  | 2.83908  | 0.25139  |
| H  | -0.41709 | 2.88778  | 1.05503  |
| O  | 2.10235  | 2.02310  | -1.11495 |
| O  | 1.88459  | 1.34945  | 1.54015  |
| H  | 2.09215  | 0.42142  | 1.72553  |
| O  | 0.28853  | 0.20006  | -0.25233 |
| H  | 2.58778  | 1.23280  | -1.39883 |
| H  | -1.47968 | 0.42641  | -0.71536 |
| N  | -2.47011 | 0.59621  | -0.89394 |
| H  | -2.72089 | 1.33725  | -1.52368 |
| C  | -3.38342 | 0.08223  | -0.07867 |
| N  | -4.65158 | 0.48864  | -0.15315 |
| N  | -3.01930 | -0.83148 | 0.80606  |
| H  | -5.36981 | 0.03819  | 0.38428  |
| H  | -4.93198 | 1.18702  | -0.81742 |
| H  | -3.70955 | -1.25158 | 1.40247  |
| H  | -2.07145 | -1.23908 | 0.76751  |

*12\_sg-g.mol2*

E = -1391.544809  
H = -1391.324246  
G = -1391.392631  
G(quasi-RRHO) = -1391.389835

|    |          |          |          |
|----|----------|----------|----------|
| Si | -1.76723 | -0.92767 | -0.07378 |
| O  | -2.43038 | -1.99190 | -1.19865 |
| H  | -3.34970 | -2.16625 | -0.98594 |
| O  | -0.85611 | -1.42708 | 1.26775  |
| O  | -3.28376 | -0.93347 | 0.79381  |
| H  | -3.45139 | -0.09322 | 1.22165  |
| H  | -1.43901 | -1.54956 | 2.02107  |
| O  | -0.25911 | -1.00479 | -1.06265 |
| H  | -0.35555 | -1.67644 | -1.74060 |

|    |          |          |          |
|----|----------|----------|----------|
| Si | -0.45894 | 1.71141  | 0.03990  |
| O  | 0.53296  | 1.54085  | -1.26985 |
| H  | 0.32974  | 0.65518  | -1.63341 |
| O  | 0.30094  | 1.27907  | 1.42461  |
| O  | -0.80551 | 3.29251  | 0.22439  |
| H  | -0.95268 | 3.80580  | -0.57215 |
| O  | -1.75706 | 0.76980  | -0.17556 |
| H  | 0.11686  | 0.35835  | 1.66729  |
| H  | 1.31235  | -1.24516 | -0.24738 |
| H  | 2.30982  | -2.29960 | 0.71140  |
| N  | 2.22653  | -1.45318 | 0.17696  |
| C  | 3.28835  | -0.68292 | 0.01246  |
| N  | 3.18143  | 0.48993  | -0.60111 |
| N  | 4.47769  | -1.07941 | 0.47137  |
| H  | 5.28992  | -0.49999 | 0.36042  |
| H  | 4.61859  | -2.02481 | 0.77883  |
| H  | 3.99855  | 1.05623  | -0.74335 |
| H  | 2.27352  | 0.90333  | -0.79966 |

*13\_sg-g.mol2*

E = -1391.542056  
H = -1391.321675  
G = -1391.392101  
G(quasi-RRHO) = -1391.388576

|    |          |          |          |
|----|----------|----------|----------|
| Si | 1.09744  | -1.42414 | -0.13315 |
| O  | 0.21017  | -0.85873 | 1.36249  |
| H  | -0.00967 | -1.60362 | 1.92748  |
| O  | 1.81853  | -1.99723 | -1.60424 |
| O  | 2.43056  | -1.88603 | 0.78809  |
| H  | 2.34265  | -1.62186 | 1.70527  |
| H  | 2.57574  | -1.47488 | -1.86991 |
| O  | -0.20270 | -2.46457 | -0.39103 |
| H  | -0.05697 | -2.97050 | -1.19375 |
| Si | 1.11893  | 1.64612  | -0.00119 |
| O  | 2.29117  | 2.63021  | -0.57866 |
| H  | 3.16980  | 2.52496  | -0.20859 |
| O  | 1.25960  | 1.57344  | 1.62370  |
| O  | -0.29892 | 2.33714  | -0.48804 |
| H  | -0.46342 | 3.24341  | -0.21752 |
| O  | 1.11055  | 0.18357  | -0.66556 |
| H  | 0.89085  | 0.71491  | 1.91732  |
| H  | -1.55674 | -0.43617 | 1.00911  |
| N  | -2.58243 | -0.38621 | 1.01962  |

|   |          |          |          |
|---|----------|----------|----------|
| H | -3.04943 | -0.94977 | 1.70869  |
| C | -3.27999 | 0.05938  | -0.01540 |
| N | -4.57292 | -0.24169 | -0.12888 |
| N | -2.69567 | 0.81118  | -0.94009 |
| H | -5.14307 | 0.18599  | -0.83579 |
| H | -5.00490 | -0.90834 | 0.48493  |
| H | -3.23335 | 1.13687  | -1.72388 |
| H | -1.80522 | 1.26972  | -0.75888 |

*14\_sg-g.mol2*

E = -1391.541978  
H = -1391.321182  
G = -1391.389865  
G(quasi-RRHO) = -1391.386910

|    |          |          |          |
|----|----------|----------|----------|
| Si | -0.62679 | 1.38346  | -0.00377 |
| O  | 0.84505  | 2.22816  | 0.03404  |
| H  | 1.28109  | 2.17663  | -0.81986 |
| O  | -1.14047 | 2.30971  | 1.36271  |
| O  | 0.00290  | 0.43434  | -1.42847 |
| H  | -0.26408 | 0.82130  | -2.26504 |
| H  | -1.71895 | 1.79791  | 1.92898  |
| O  | -0.84677 | -0.08498 | 0.80637  |
| O  | -1.92504 | 1.85718  | -0.98440 |
| Si | -1.60568 | -1.37278 | 0.16955  |
| O  | -2.95419 | -0.85518 | -0.61243 |
| O  | -0.62212 | -2.25792 | -0.79502 |
| H  | 1.71831  | -0.11462 | -1.20535 |
| O  | -2.04764 | -2.45412 | 1.31272  |
| H  | -2.76853 | -2.20125 | 1.89187  |
| H  | -2.88993 | 0.06343  | -0.91526 |
| H  | -2.46707 | 2.50034  | -0.52077 |
| H  | 3.00946  | -1.12307 | -1.78937 |
| H  | -0.15157 | -1.65208 | -1.38314 |
| N  | 2.65663  | -0.51135 | -1.07450 |
| C  | 3.32232  | -0.39472 | 0.06642  |
| N  | 4.43058  | -1.10623 | 0.26655  |
| N  | 2.88925  | 0.43236  | 1.00911  |
| H  | 4.98845  | -0.97407 | 1.09060  |
| H  | 4.72012  | -1.80784 | -0.39034 |
| H  | 2.14505  | 1.09921  | 0.80967  |
| H  | 3.38943  | 0.51204  | 1.87630  |



TS3-cg, water cleavage from IM2, C(NH<sub>2</sub>)<sub>3</sub><sup>+</sup> acting as catalyst

00\_cg-k.mol2

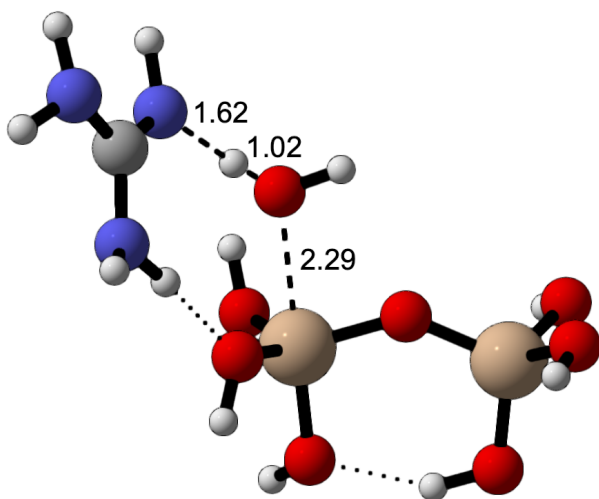

E = -1391.535144  
H = -1391.317180  
G = -1391.389865  
G(quasi-RRHO) = -1391.384873

|    |          |          |          |
|----|----------|----------|----------|
| Si | 0.38748  | 1.06808  | 0.11085  |
| O  | 0.22846  | 2.01070  | 1.44208  |
| H  | -0.33245 | 1.61068  | 2.11161  |
| O  | -0.87198 | 0.95644  | -0.95366 |
| O  | -1.01888 | -0.23210 | 1.37415  |
| H  | -0.60469 | -1.09861 | 1.39974  |
| H  | -0.70621 | 1.48947  | -1.73670 |
| O  | 1.44123  | 2.05279  | -0.76720 |
| H  | 1.50944  | 2.95523  | -0.44914 |
| Si | 2.77632  | -0.82734 | -0.12621 |
| O  | 3.58319  | -1.27633 | 1.21864  |
| H  | 3.84319  | -0.58294 | 1.82780  |
| O  | 3.55683  | 0.34048  | -0.95207 |
| O  | 2.71990  | -2.23397 | -0.94930 |
| H  | 2.29285  | -2.22572 | -1.80777 |
| O  | 1.27414  | -0.30446 | 0.22861  |
| H  | 3.01063  | 1.14267  | -1.04000 |
| N  | -3.72287 | 0.10830  | -1.19157 |
| H  | -4.06627 | -0.12855 | -2.10609 |
| C  | -4.26677 | -0.52698 | -0.12056 |
| N  | -5.52336 | -1.03626 | -0.31433 |

|   |          |          |          |
|---|----------|----------|----------|
| N | -3.59990 | -0.62763 | 0.98218  |
| H | -6.03191 | -1.30290 | 0.51143  |
| H | -6.09243 | -0.60245 | -1.02222 |
| H | -4.14446 | -1.04817 | 1.72341  |
| H | -2.01297 | -0.37009 | 1.18936  |
| H | -2.73747 | 0.33382  | -1.12709 |

*01\_cg-k.mol2*

E = -1391.537486  
H = -1391.320866  
G = -1391.386577  
G(quasi-RRHO) = -1391.384137

|    |          |          |          |
|----|----------|----------|----------|
| Si | 0.95276  | -1.38495 | -0.13445 |
| O  | 1.50358  | -2.68566 | -1.00832 |
| H  | 2.37823  | -2.97176 | -0.73897 |
| O  | -0.16974 | -1.62858 | 1.09660  |
| O  | 1.17494  | 0.15288  | -0.71380 |
| H  | 0.23067  | -1.60057 | 1.96853  |
| O  | -0.54065 | -1.44157 | -1.30373 |
| H  | -0.97839 | -2.29829 | -1.31484 |
| H  | -1.28519 | -0.65321 | -1.10592 |
| O  | 2.32323  | -1.25575 | 0.93560  |
| H  | 2.50143  | -2.01353 | 1.49589  |
| Si | 1.27707  | 1.60410  | 0.00510  |
| O  | 2.15613  | 2.66112  | -0.88319 |
| H  | 1.68448  | 3.14415  | -1.56411 |
| O  | 2.06961  | 1.44170  | 1.42302  |
| H  | 2.33773  | 0.51296  | 1.55029  |
| O  | -0.22606 | 2.21142  | 0.19548  |
| H  | -0.94179 | 1.61889  | -0.10615 |
| N  | -2.23914 | 0.36982  | -0.84555 |
| C  | -3.16683 | 0.17320  | 0.06778  |
| N  | -4.41770 | 0.67320  | -0.03391 |
| N  | -2.87637 | -0.56420 | 1.14542  |
| H  | -5.01057 | 0.69935  | 0.77731  |
| H  | -4.59973 | 1.36933  | -0.73472 |
| H  | -3.58671 | -0.80846 | 1.81046  |
| H  | -1.96275 | -1.00389 | 1.20648  |
| H  | -2.57990 | 0.90149  | -1.63512 |

*02\_cg-k.mol2*

E = -1391.534954

H = -1391.316565  
G = -1391.385276  
G(quasi-RRHO) = -1391.381891

|    |          |          |          |
|----|----------|----------|----------|
| Si | 0.05572  | 0.41480  | -0.13258 |
| O  | -0.73160 | 1.13864  | 1.14894  |
| H  | -0.51752 | 2.07402  | 1.20243  |
| O  | -0.82979 | 0.08653  | -1.48188 |
| O  | 1.43685  | -0.39976 | 0.24008  |
| H  | -1.65438 | -0.40517 | -1.34242 |
| O  | -0.84308 | -1.28800 | 0.63975  |
| H  | -0.79120 | -1.30044 | 1.60029  |
| H  | -3.67539 | -1.92383 | -0.85116 |
| H  | -1.83041 | -1.31296 | 0.36298  |
| O  | 0.82129  | 1.81103  | -0.76659 |
| H  | 0.33269  | 2.21738  | -1.48457 |
| Si | 3.04726  | -0.28579 | 0.06245  |
| O  | 3.81869  | -0.42941 | 1.49545  |
| H  | 3.77370  | 0.32144  | 2.08999  |
| O  | 3.40559  | 1.12483  | -0.67101 |
| H  | 2.58305  | 1.62016  | -0.85952 |
| O  | 3.63678  | -1.57909 | -0.74333 |
| H  | 3.27198  | -1.75612 | -1.61222 |
| N  | -3.25001 | -1.16160 | -0.34130 |
| C  | -4.12210 | -0.27408 | 0.04590  |
| N  | -3.73610 | 0.75786  | 0.82914  |
| N  | -5.43566 | -0.30454 | -0.30373 |
| H  | -2.74447 | 0.91865  | 0.95918  |
| H  | -4.33487 | 1.56076  | 0.90617  |
| H  | -5.79511 | -1.16061 | -0.68838 |
| H  | -6.09268 | 0.22486  | 0.24355  |

TS3-sg, water cleavage from IM2, C(NH<sub>2</sub>)<sub>3</sub><sup>+</sup> acting as spectator  
*00\_sg-k.mol2*

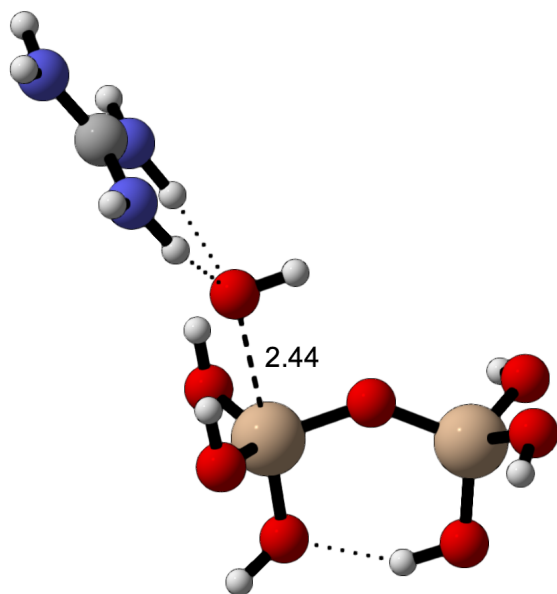

E = -1391.532232  
H = -1391.314613  
G = -1391.389358  
G(quasi-RRHO) = -1391.384066

|    |          |          |          |
|----|----------|----------|----------|
| Si | 0.62484  | 1.18881  | 0.02657  |
| O  | -0.12920 | 1.64201  | 1.41121  |
| H  | -0.92346 | 1.09087  | 1.46419  |
| O  | -0.05774 | 1.57119  | -1.41636 |
| O  | -1.41866 | -0.13996 | 0.00333  |
| H  | -1.01614 | -1.01186 | 0.01357  |
| H  | -0.86164 | 1.03358  | -1.47156 |
| O  | 1.97311  | 2.18761  | 0.02201  |
| H  | 1.85670  | 3.05107  | -0.37771 |
| Si | 2.83530  | -0.92201 | 0.00217  |
| O  | 3.15741  | -1.87471 | 1.28839  |
| H  | 3.11442  | -1.46849 | 2.15586  |
| O  | 3.91812  | 0.28652  | -0.16438 |
| O  | 2.94741  | -1.99754 | -1.22093 |
| H  | 2.93861  | -1.64802 | -2.11367 |
| O  | 1.34472  | -0.28439 | 0.11570  |
| H  | 3.48775  | 1.16001  | -0.14577 |
| H  | -4.35319 | -0.47706 | -2.03022 |
| H  | -2.87846 | -0.32092 | -1.02748 |
| N  | -3.89977 | -0.43149 | -1.13644 |
| C  | -4.58787 | -0.51806 | -0.00747 |
| N  | -5.91475 | -0.65250 | -0.01410 |

|   |          |          |          |
|---|----------|----------|----------|
| N | -3.90916 | -0.45511 | 1.12900  |
| H | -6.41454 | -0.76157 | -0.87766 |
| H | -6.42106 | -0.78414 | 0.84251  |
| H | -2.88815 | -0.33830 | 1.03129  |
| H | -4.37121 | -0.50418 | 2.01814  |

TS4-sg, water cleavage from IM2, C(NH<sub>2</sub>)<sub>3</sub><sup>+</sup> acting as spectator

*00\_sg-m.mol2*

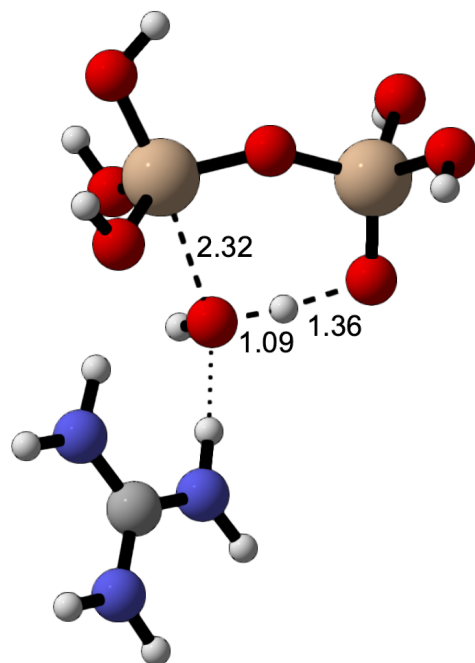

E = -1391.533531  
H = -1391.316900  
G = -1391.390566  
G(quasi-RRHO) = -1391.385638

|    |          |          |          |
|----|----------|----------|----------|
| Si | -0.62762 | 1.46555  | 0.02600  |
| O  | -0.63674 | 1.88723  | 1.62571  |
| H  | -1.07203 | 2.73274  | 1.76051  |
| O  | -1.30943 | 2.85025  | -0.64470 |
| O  | 0.48282  | -0.29088 | 1.05166  |
| H  | 0.48682  | 0.02246  | 1.96112  |
| H  | -2.13580 | 2.69616  | -1.10408 |
| O  | -1.66429 | 0.32765  | -0.48967 |
| O  | 0.84955  | 1.53251  | -0.73457 |
| Si | -2.27363 | -1.17361 | -0.15052 |
| O  | -2.65235 | -1.84818 | -1.61032 |

|   |          |          |          |
|---|----------|----------|----------|
| O | -1.26212 | -1.96711 | 0.76695  |
| H | -0.24867 | -1.09209 | 0.99239  |
| O | -3.78918 | -0.98380 | 0.48087  |
| H | -3.82872 | -0.99936 | 1.43823  |
| H | -1.91731 | -1.97381 | -2.21245 |
| H | 0.84689  | 2.23997  | -1.38630 |
| N | 2.99056  | -1.38641 | 0.47340  |
| H | 3.25217  | -2.30175 | 0.79302  |
| C | 3.88947  | -0.60153 | -0.09874 |
| N | 5.14770  | -1.01501 | -0.25114 |
| N | 3.52897  | 0.60240  | -0.52096 |
| H | 5.82490  | -0.44935 | -0.72969 |
| H | 5.44923  | -1.89726 | 0.12033  |
| H | 4.20430  | 1.21032  | -0.94789 |
| H | 2.54972  | 0.89048  | -0.51522 |
| H | 2.05247  | -1.02476 | 0.68918  |

*01\_sg-m.mol2*

E = -1391.533612

H = -1391.316847

G = -1391.388999

G(quasi-RRHO) = -1391.384797

|    |          |          |          |
|----|----------|----------|----------|
| Si | 0.64905  | 1.47347  | -0.08758 |
| O  | 0.32478  | 2.05463  | -1.60097 |
| H  | 0.67728  | 2.94071  | -1.71523 |
| O  | 1.31602  | 2.85503  | 0.60357  |
| O  | -0.46883 | -0.27582 | -1.11520 |
| H  | -0.37109 | -0.01733 | -2.03648 |
| H  | 2.19488  | 2.72724  | 0.96269  |
| O  | 1.87660  | 0.42231  | 0.07826  |
| O  | -0.65696 | 1.28130  | 0.92398  |
| Si | 2.24898  | -1.18962 | 0.13567  |
| O  | 2.44785  | -1.62648 | 1.71559  |
| O  | 1.12210  | -2.03989 | -0.56642 |
| H  | 0.18616  | -1.11967 | -0.93559 |
| O  | 3.77682  | -1.31844 | -0.48886 |
| H  | 3.88168  | -1.04799 | -1.40272 |
| H  | 3.18516  | -1.22276 | 2.17681  |
| H  | -0.59362 | 1.90095  | 1.65704  |
| H  | -2.37223 | 0.64109  | 0.82467  |
| N  | -3.35323 | 0.36988  | 0.89928  |
| H  | -3.91409 | 0.79917  | 1.61286  |
| C  | -3.86799 | -0.57619 | 0.12673  |

|   |          |          |          |
|---|----------|----------|----------|
| N | -5.14124 | -0.94258 | 0.27766  |
| N | -3.10967 | -1.15501 | -0.79010 |
| H | -5.55210 | -1.63528 | -0.32110 |
| H | -5.73344 | -0.49265 | 0.95169  |
| H | -3.49523 | -1.86200 | -1.38995 |
| H | -2.13601 | -0.85527 | -0.92581 |

*02\_sg-m.mol2*

E = -1391.533630  
H = -1391.316552  
G = -1391.387299  
G(quasi-RRHO) = -1391.383612

|    |          |          |          |
|----|----------|----------|----------|
| Si | -1.09361 | -1.44173 | -0.15141 |
| O  | 0.31155  | -2.30918 | -0.25817 |
| H  | 0.75080  | -2.19099 | 0.59621  |
| O  | -1.89557 | -2.16506 | -1.42791 |
| O  | 0.25258  | -0.63892 | 1.64649  |
| H  | -0.03389 | -1.04730 | 2.46618  |
| H  | -2.42746 | -1.56525 | -1.95230 |
| O  | -1.05197 | 0.11767  | -0.64770 |
| O  | -2.08200 | -1.76315 | 1.13163  |
| Si | -1.23291 | 1.63425  | -0.07154 |
| O  | -2.80770 | 2.09121  | -0.15804 |
| O  | -0.61711 | 1.71174  | 1.41477  |
| H  | 1.82879  | -0.22872 | 1.35202  |
| O  | -0.43903 | 2.69302  | -1.03459 |
| H  | -0.85097 | 2.91868  | -1.87053 |
| H  | -3.44925 | 1.54285  | 0.29766  |
| H  | -2.86523 | -2.24817 | 0.85912  |
| H  | 3.32419  | 0.58297  | 1.80738  |
| H  | -0.22854 | 0.79023  | 1.64808  |
| N  | 2.79257  | 0.10021  | 1.10439  |
| C  | 3.27769  | 0.03532  | -0.12138 |
| N  | 4.46658  | 0.57494  | -0.40690 |
| N  | 2.59504  | -0.57627 | -1.08618 |
| H  | 4.81494  | 0.58033  | -1.34848 |
| H  | 4.93227  | 1.16141  | 0.26186  |
| H  | 1.76535  | -1.12186 | -0.87811 |
| H  | 2.99881  | -0.67214 | -2.00062 |

*03\_sg-m.mol2*

E = -1391.534164

H = -1391.316856  
G = -1391.386386  
G(quasi-RRHO) = -1391.383096

|    |          |          |          |
|----|----------|----------|----------|
| Si | -0.83364 | -1.42973 | -0.28578 |
| O  | 0.25958  | -1.62008 | 0.96251  |
| H  | -0.16220 | -1.53753 | 1.82189  |
| O  | 0.21320  | -1.87512 | -1.53700 |
| O  | -2.16579 | -1.10011 | 1.34427  |
| H  | -2.97832 | -1.57200 | 1.14449  |
| H  | 0.61999  | -1.13006 | -1.98017 |
| O  | -1.11624 | 0.12198  | -0.74834 |
| O  | -1.96202 | -2.61195 | -0.57807 |
| Si | -1.45660 | 1.54676  | -0.00230 |
| O  | -2.07076 | 2.58502  | -1.13094 |
| O  | -2.37516 | 1.32735  | 1.26281  |
| H  | -2.36088 | -0.03737 | 1.39344  |
| O  | 0.06655  | 2.14961  | 0.30235  |
| H  | 0.10571  | 2.96695  | 0.80333  |
| H  | -3.02788 | 2.60225  | -1.18612 |
| H  | -1.73871 | -3.10515 | -1.37116 |
| H  | 1.95662  | -0.95728 | 0.84248  |
| H  | 3.57365  | -1.46774 | 1.18300  |
| C  | 3.47138  | 0.25179  | 0.13556  |
| N  | 2.95940  | -0.76054 | 0.81959  |
| N  | 4.78450  | 0.30396  | -0.08901 |
| N  | 2.68982  | 1.21470  | -0.33484 |
| H  | 5.38617  | -0.45354 | 0.17900  |
| H  | 5.20834  | 1.12193  | -0.48781 |
| H  | 1.72490  | 1.34461  | -0.03524 |
| H  | 3.09673  | 1.95537  | -0.87821 |

*04\_sg-m.mol2*

E = -1391.534164  
H = -1391.316856  
G = -1391.386382  
G(quasi-RRHO) = -1391.383094

|    |          |          |          |
|----|----------|----------|----------|
| Si | -0.83353 | -1.42974 | -0.28580 |
| O  | 0.25972  | -1.61988 | 0.96250  |
| H  | -0.16209 | -1.53746 | 1.82188  |
| O  | 0.21340  | -1.87497 | -1.53700 |
| O  | -2.16576 | -1.10030 | 1.34422  |
| H  | -2.97826 | -1.57224 | 1.14440  |



|    |          |          |          |
|----|----------|----------|----------|
| H  | 0.62020  | -1.12986 | -1.98008 |
| O  | -1.11639 | 0.12192  | -0.74836 |
| O  | -1.96172 | -2.61214 | -0.57813 |
| Si | -1.45677 | 1.54667  | -0.00228 |
| O  | -2.07101 | 2.58497  | -1.13084 |
| O  | -2.37531 | 1.32718  | 1.26283  |
| H  | -2.36092 | -0.03756 | 1.39342  |
| O  | 0.06638  | 2.14953  | 0.30233  |
| H  | 0.10552  | 2.96723  | 0.80273  |
| H  | -3.02814 | 2.60234  | -1.18583 |
| H  | -1.73831 | -3.10530 | -1.37121 |
| N  | 2.68977  | 1.21475  | -0.33486 |
| H  | 3.09660  | 1.95539  | -0.87833 |
| C  | 3.47141  | 0.25191  | 0.13558  |
| N  | 4.78451  | 0.30418  | -0.08901 |
| N  | 2.95952  | -0.76041 | 0.81968  |
| H  | 5.38626  | -0.45321 | 0.17912  |
| H  | 5.20828  | 1.12216  | -0.48785 |
| H  | 3.57383  | -1.46758 | 1.18307  |
| H  | 1.95676  | -0.95723 | 0.84256  |
| H  | 1.72479  | 1.34451  | -0.03540 |

*05\_sg-m.mol2*

E = -1391.535143

H = -1391.316815

G = -1391.385124

G(quasi-RRHO) = -1391.381890

|    |          |          |          |
|----|----------|----------|----------|
| Si | 0.62857  | 1.43717  | -0.17860 |
| O  | -0.34873 | 1.49032  | 1.16188  |
| H  | 0.17300  | 1.46086  | 1.96996  |
| O  | -0.63235 | 1.80791  | -1.24945 |
| O  | 2.14144  | 1.10597  | 1.48716  |
| H  | 2.93106  | 1.60015  | 1.25426  |
| H  | -0.44803 | 1.56041  | -2.15866 |
| O  | 1.08203  | -0.02001 | -0.73522 |
| O  | 1.68026  | 2.67644  | -0.45996 |
| Si | 1.54994  | -1.50409 | -0.15885 |
| O  | 2.35770  | -2.26899 | -1.38235 |
| O  | 2.37617  | -1.33312 | 1.17309  |
| H  | 2.34756  | 0.07419  | 1.42824  |
| O  | 0.17340  | -2.42116 | -0.08305 |
| H  | -0.60486 | -1.98252 | 0.27045  |
| H  | 3.31237  | -2.21233 | -1.31985 |

|   |          |          |          |
|---|----------|----------|----------|
| H | 1.34613  | 3.31034  | -1.09869 |
| H | -1.68372 | 0.21784  | 1.18176  |
| H | -2.60897 | -1.05435 | 1.88929  |
| C | -3.34177 | -0.33952 | 0.14869  |
| N | -2.38810 | -0.51397 | 1.06970  |
| N | -4.44910 | -1.07229 | 0.19468  |
| N | -3.16263 | 0.55252  | -0.81034 |
| H | -4.59312 | -1.74622 | 0.92513  |
| H | -5.14030 | -1.01497 | -0.53167 |
| H | -2.27102 | 1.04360  | -0.91626 |
| H | -3.84931 | 0.65443  | -1.53693 |

*06\_sg-m.mol2*

E = -1391.531982

H = -1391.314956

G = -1391.384093

G(quasi-RRHO) = -1391.380792

|    |          |          |          |
|----|----------|----------|----------|
| Si | 1.44006  | -1.29074 | -0.27211 |
| O  | 2.79026  | -2.02354 | 0.33522  |
| H  | 2.84228  | -1.91380 | 1.28727  |
| O  | 1.68449  | -1.85005 | -1.85054 |
| O  | 1.15416  | -0.78843 | 1.79076  |
| H  | 0.38443  | -1.25821 | 2.12101  |
| H  | 1.43329  | -1.21118 | -2.51828 |
| O  | 1.44043  | 0.32131  | -0.57865 |
| O  | -0.06597 | -1.99383 | -0.02060 |
| Si | 0.94759  | 1.73737  | 0.08873  |
| O  | -0.46299 | 2.05538  | -0.73997 |
| O  | 0.81369  | 1.60503  | 1.65806  |
| H  | 0.96754  | 0.29418  | 1.85044  |
| O  | 1.95860  | 2.94377  | -0.41050 |
| H  | 2.64902  | 3.17668  | 0.21273  |
| H  | -0.76969 | 2.96370  | -0.68721 |
| H  | -0.29459 | -2.53586 | -0.78151 |
| H  | -1.70757 | -1.18164 | 0.40730  |
| N  | -2.67741 | -1.03243 | 0.68284  |
| H  | -3.07468 | -1.70428 | 1.31597  |
| C  | -3.48389 | -0.23981 | -0.01182 |
| N  | -4.80335 | -0.34938 | 0.12445  |
| N  | -2.97753 | 0.66173  | -0.84352 |
| H  | -5.42350 | 0.32046  | -0.29374 |
| H  | -5.21082 | -1.10390 | 0.64687  |
| H  | -3.60262 | 1.24814  | -1.36862 |

H -2.01025 0.97503 -0.77065

PC-g, product complexes

00\_cg-p3.mol2

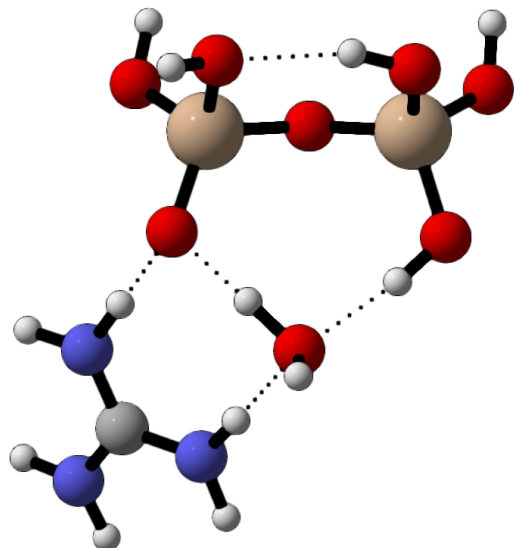

E = -1391.562715

H = -1391.343663

G = -1391.415260

G(quasi-RRHO) = -1391.411495

|    |          |          |          |
|----|----------|----------|----------|
| Si | 0.54841  | 1.45556  | 0.09032  |
| O  | -0.73185 | 0.94167  | 0.85069  |
| H  | -0.70889 | -0.52331 | 1.28486  |
| O  | 0.14483  | 2.65439  | -0.96460 |
| O  | -0.76337 | -1.53330 | 1.42075  |
| H  | -0.78128 | -1.69591 | 2.36773  |
| H  | 0.86715  | 3.05756  | -1.44991 |
| O  | 1.34078  | 0.29264  | -0.77247 |
| O  | 1.76647  | 1.99169  | 1.09834  |
| Si | 2.37080  | -0.89734 | -0.34681 |
| O  | 3.39813  | -0.29304 | 0.77824  |
| O  | 1.56640  | -2.21406 | 0.15708  |
| H  | -2.44597 | -1.52582 | 0.62027  |
| O  | 3.23311  | -1.43723 | -1.62508 |
| H  | 3.96950  | -0.89159 | -1.90700 |
| H  | 3.09996  | 0.56123  | 1.12672  |
| H  | 1.48544  | 2.46130  | 1.88614  |
| H  | -3.87602 | -2.35454 | 0.09206  |

|   |          |          |          |
|---|----------|----------|----------|
| H | 0.73104  | -2.05108 | 0.64439  |
| N | -3.35771 | -1.49772 | 0.16334  |
| C | -3.90833 | -0.35724 | -0.23695 |
| N | -5.14472 | -0.37225 | -0.74727 |
| N | -3.25068 | 0.78214  | -0.12152 |
| H | -5.53955 | 0.45668  | -1.15293 |
| H | -5.62290 | -1.24006 | -0.90909 |
| H | -2.27418 | 0.83753  | 0.24380  |
| H | -3.68741 | 1.62911  | -0.43992 |

*01\_sg-p3.mol2*

E = -1391.552095  
H = -1391.333872  
G = -1391.410750  
G(quasi-RRHO) = -1391.405031

|    |          |          |          |
|----|----------|----------|----------|
| Si | 0.24121  | -1.28295 | -0.37174 |
| O  | -0.57159 | -0.16939 | -1.23008 |
| H  | -0.05034 | 0.52685  | -1.73240 |
| O  | -0.80774 | -1.58564 | 0.86520  |
| O  | 0.82306  | 1.69230  | -2.36886 |
| H  | 1.24378  | 1.43934  | -3.19395 |
| H  | -0.64938 | -2.36692 | 1.39955  |
| O  | 1.68746  | -0.80123 | 0.13446  |
| O  | 0.54206  | -2.66232 | -1.19984 |
| Si | 2.51602  | 0.56849  | 0.57007  |
| O  | 4.03060  | 0.03431  | 0.98754  |
| O  | 2.52616  | 1.69163  | -0.52504 |
| H  | 1.56247  | 1.72028  | -1.64571 |
| O  | 1.79490  | 0.95195  | 2.01303  |
| H  | 2.03355  | 1.80790  | 2.37290  |
| H  | 4.69135  | 0.15407  | 0.30355  |
| H  | -0.20866 | -3.10509 | -1.60043 |
| H  | -2.32459 | 0.27559  | -0.97862 |
| H  | -3.78638 | 0.98488  | -1.60273 |
| C  | -3.85982 | 0.50318  | 0.36009  |
| N  | -3.29558 | 0.55891  | -0.83704 |
| N  | -5.06686 | 1.03176  | 0.55561  |
| N  | -3.21998 | -0.07790 | 1.36570  |
| H  | -5.54499 | 1.51464  | -0.18316 |
| H  | -5.54592 | 0.91785  | 1.43042  |
| H  | -2.35194 | -0.58533 | 1.21177  |
| H  | -3.63355 | -0.10315 | 2.28045  |

02\_sg-p2.mol2

E = -1391.548748  
H = -1391.330077  
G = -1391.407429  
G(quasi-RRHO) = -1391.401585

|    |          |          |          |
|----|----------|----------|----------|
| Si | -0.44815 | 0.21763  | 0.48614  |
| O  | 0.17933  | 1.63389  | 0.66099  |
| H  | 1.45806  | 2.06290  | -0.05039 |
| O  | 0.65992  | -0.83438 | -0.17923 |
| O  | 2.33046  | 2.35183  | -0.49212 |
| H  | 2.12480  | 2.53121  | -1.41231 |
| H  | 0.32126  | -1.69994 | -0.41968 |
| O  | -1.01815 | -0.47146 | 1.90151  |
| H  | -0.59950 | -0.15804 | 2.70555  |
| Si | -3.36628 | -0.18444 | -0.33980 |
| O  | -4.26957 | 1.11210  | -0.75372 |
| H  | -4.20068 | 1.88923  | -0.19644 |
| O  | -3.67013 | -0.66443 | 1.19129  |
| O  | -3.88155 | -1.28096 | -1.43534 |
| H  | -3.49923 | -2.15891 | -1.38862 |
| O  | -1.77633 | 0.10037  | -0.49218 |
| H  | -2.86310 | -0.68768 | 1.73362  |
| H  | 5.40633  | 1.30448  | 0.00795  |
| N  | 4.55532  | 0.78535  | -0.11795 |
| H  | 3.67820  | 1.31390  | -0.25903 |
| C  | 4.60897  | -0.53317 | -0.18787 |
| N  | 3.49832  | -1.24692 | -0.32043 |
| N  | 5.78649  | -1.15961 | -0.11440 |
| H  | 3.55434  | -2.24840 | -0.37111 |
| H  | 2.56706  | -0.84247 | -0.25730 |
| H  | 5.84352  | -2.15887 | -0.19268 |
| H  | 6.64441  | -0.64064 | -0.16136 |

03\_cg-p2.mol2

E = -1391.552260  
H = -1391.333237  
G = -1391.407358  
G(quasi-RRHO) = -1391.402422

|    |          |          |          |
|----|----------|----------|----------|
| Si | -0.18715 | -0.30318 | -0.08382 |
| O  | 0.69143  | -0.27631 | 1.27207  |
| H  | 1.64299  | 0.00505  | 1.19208  |
| O  | 0.62911  | 0.36982  | -1.32311 |

|    |          |          |          |
|----|----------|----------|----------|
| O  | -1.61464 | 0.43693  | 0.17589  |
| H  | 2.63152  | -0.44531 | -1.24161 |
| O  | 2.09744  | 2.49163  | -0.57263 |
| H  | 1.68455  | 3.18537  | -0.05117 |
| O  | -0.62365 | -1.82668 | -0.52858 |
| H  | 0.04761  | -2.51101 | -0.55566 |
| Si | -3.20657 | 0.09030  | 0.12230  |
| O  | -3.93502 | 0.41242  | 1.54350  |
| H  | -3.70667 | -0.14082 | 2.29263  |
| O  | -3.38631 | -1.47194 | -0.31050 |
| H  | -2.55033 | -1.93545 | -0.46711 |
| O  | -3.99511 | 1.10263  | -0.88163 |
| H  | -3.74504 | 1.09342  | -1.80726 |
| N  | 3.53128  | -0.78238 | -0.93125 |
| C  | 4.04821  | -0.25176 | 0.20130  |
| N  | 5.34990  | -0.54207 | 0.45769  |
| N  | 3.30149  | 0.49895  | 0.96321  |
| H  | 5.69976  | -0.35017 | 1.37991  |
| H  | 5.77455  | -1.32563 | -0.00808 |
| H  | 3.78861  | 0.77750  | 1.80530  |
| H  | 2.56988  | 1.90157  | 0.06459  |
| H  | 4.15168  | -1.13406 | -1.63873 |
| H  | 1.04880  | 1.24092  | -1.13885 |

04\_sg-p3.mol2

E = -1391.552307

H = -1391.333425

G = -1391.407130

G(quasi-RRHO) = -1391.402949

|    |          |          |          |
|----|----------|----------|----------|
| Si | 1.18968  | 1.51461  | -0.28800 |
| O  | -0.05473 | 1.48662  | 0.76316  |
| H  | 0.08400  | 0.99085  | 1.61822  |
| O  | 0.48139  | 2.00974  | -1.67437 |
| O  | 0.27928  | -0.02870 | 2.87558  |
| H  | 0.97862  | 0.22884  | 3.48091  |
| H  | 1.06015  | 2.28741  | -2.38671 |
| O  | 1.90853  | 0.06590  | -0.39483 |
| O  | 2.34119  | 2.61606  | 0.09182  |
| Si | 1.38086  | -1.48705 | -0.14741 |
| O  | 2.56624  | -2.34737 | -0.91668 |
| O  | 1.09072  | -1.87077 | 1.34073  |
| H  | 0.63746  | -0.80957 | 2.31434  |
| O  | -0.01919 | -1.63444 | -1.05741 |

|   |          |          |          |
|---|----------|----------|----------|
| H | 0.09454  | -1.53547 | -2.00577 |
| H | 2.61132  | -3.27637 | -0.68418 |
| H | 3.12369  | 2.28783  | 0.53861  |
| H | -1.74012 | -1.21330 | -0.54652 |
| N | -2.74907 | -1.20157 | -0.39263 |
| H | -3.25007 | -2.05327 | -0.57449 |
| C | -3.42682 | -0.08866 | -0.15166 |
| N | -4.75970 | -0.11464 | -0.15130 |
| N | -2.79262 | 1.04959  | 0.08962  |
| H | -5.29324 | 0.70319  | 0.08104  |
| H | -5.26078 | -0.94870 | -0.39754 |
| H | -3.32485 | 1.88016  | 0.27963  |
| H | -1.78519 | 1.09447  | 0.24447  |

*05\_sg-p2.mol2*

E = -1391.546214  
H = -1391.328587  
G = -1391.405960  
G(quasi-RRHO) = -1391.399505

|    |          |          |          |
|----|----------|----------|----------|
| Si | 0.58921  | 0.05974  | 0.13466  |
| O  | -0.25853 | -1.28554 | 0.46160  |
| H  | -1.10008 | -1.26675 | -0.08967 |
| O  | -0.26752 | 0.93257  | -0.93282 |
| O  | -2.28092 | -0.72580 | -1.09709 |
| H  | -2.27430 | -1.24269 | -1.90617 |
| H  | -1.10543 | 0.42152  | -1.15395 |
| O  | 0.94788  | 0.91921  | 1.49955  |
| H  | 0.22027  | 1.25382  | 2.02721  |
| Si | 3.63915  | -0.02814 | -0.06814 |
| O  | 4.46285  | -1.43117 | 0.03733  |
| H  | 4.15743  | -2.07527 | 0.67862  |
| O  | 3.71227  | 0.83849  | 1.31210  |
| O  | 4.42836  | 0.71663  | -1.28493 |
| H  | 4.21745  | 1.63773  | -1.44760 |
| O  | 2.07644  | -0.29583 | -0.43792 |
| H  | 2.84078  | 1.05296  | 1.67884  |
| H  | -4.92782 | 1.69383  | -1.13240 |
| H  | -3.60434 | 0.49725  | -1.14032 |
| N  | -4.50408 | 0.85327  | -0.78561 |
| C  | -5.12469 | 0.07699  | 0.09109  |
| N  | -6.32357 | 0.40553  | 0.57690  |
| N  | -4.51609 | -1.04057 | 0.46095  |

|   |          |          |          |
|---|----------|----------|----------|
| H | -6.73078 | 1.29946  | 0.36903  |
| H | -6.74104 | -0.13375 | 1.31364  |
| H | -3.61520 | -1.23341 | -0.00178 |
| H | -4.94612 | -1.68510 | 1.09855  |

*06\_sg-p2.mol2*

E = -1391.546222  
H = -1391.328497  
G = -1391.405517  
G(quasi-RRHO) = -1391.399218

|    |          |          |          |
|----|----------|----------|----------|
| Si | 0.58886  | -0.08710 | -0.11719 |
| O  | -0.26348 | 1.18392  | -0.65872 |
| H  | -1.10297 | 1.25493  | -0.10813 |
| O  | -0.26393 | -0.77482 | 1.08096  |
| O  | -2.27968 | 0.88443  | 0.97476  |
| H  | -2.27672 | 1.52394  | 1.69088  |
| H  | -1.10198 | -0.23493 | 1.21745  |
| O  | 0.94764  | -1.15887 | -1.32246 |
| H  | 0.21970  | -1.58157 | -1.78208 |
| Si | 3.63881  | 0.04379  | 0.05783  |
| O  | 4.44827  | 1.41252  | -0.30214 |
| H  | 4.12460  | 1.93858  | -1.03565 |
| O  | 3.71117  | -1.05569 | -1.14519 |
| O  | 4.44252  | -0.46785 | 1.38085  |
| H  | 4.24731  | -1.35068 | 1.70025  |
| O  | 2.07612  | 0.36195  | 0.38552  |
| H  | 2.83964  | -1.32938 | -1.46996 |
| H  | -4.91933 | -1.51180 | 1.35900  |
| H  | -3.60134 | -0.31944 | 1.19617  |
| N  | -4.50114 | -0.72444 | 0.89885  |
| C  | -5.12351 | -0.08621 | -0.08182 |
| N  | -6.31894 | -0.48821 | -0.51774 |
| N  | -4.52130 | 0.97125  | -0.60647 |
| H  | -6.72412 | -1.34274 | -0.18082 |
| H  | -6.74100 | -0.05844 | -1.32079 |
| H  | -3.61877 | 1.22922  | -0.18045 |
| H  | -4.95086 | 1.51094  | -1.33510 |

*07\_cg-p2.mol2*

E = -1391.546303  
H = -1391.327963  
G = -1391.405486



G(quasi-RRHO) = -1391.399681

|    |          |          |          |
|----|----------|----------|----------|
| Si | 0.24747  | 0.90116  | -0.06724 |
| O  | -0.66800 | 1.06807  | 1.28411  |
| H  | -0.22128 | 1.10492  | 2.13279  |
| O  | -0.75051 | 0.57085  | -1.27710 |
| O  | 1.38573  | -0.23077 | 0.20059  |
| H  | -1.63656 | 0.12523  | -1.10187 |
| O  | -1.59228 | -2.68913 | 0.33997  |
| H  | -2.22350 | -3.38639 | 0.53282  |
| H  | -3.56400 | -0.98800 | -1.67350 |
| H  | -2.11606 | -1.97014 | -0.06784 |
| O  | 1.12765  | 2.24861  | -0.40900 |
| H  | 0.67350  | 3.00682  | -0.78236 |
| Si | 2.99724  | -0.41720 | 0.02121  |
| O  | 3.68991  | -0.93607 | 1.40083  |
| H  | 3.76873  | -0.30672 | 2.11994  |
| O  | 3.63270  | 0.99921  | -0.47835 |
| H  | 2.98348  | 1.71176  | -0.57146 |
| O  | 3.33573  | -1.64229 | -0.99689 |
| H  | 2.98707  | -1.58947 | -1.88864 |
| N  | -3.13037 | -0.57529 | -0.85740 |
| C  | -4.01472 | -0.05176 | -0.05628 |
| N  | -3.62042 | 0.51356  | 1.10713  |
| N  | -5.35059 | -0.02454 | -0.31486 |
| H  | -2.63311 | 0.70038  | 1.22615  |
| H  | -4.25300 | 1.13040  | 1.58528  |
| H  | -5.69495 | -0.63278 | -1.03712 |
| H  | -5.98575 | 0.12526  | 0.45065  |

*08\_sg-p1.mol2*

E = -1391.547266

H = -1391.329656

G = -1391.405174

G(quasi-RRHO) = -1391.399472

|    |          |          |          |
|----|----------|----------|----------|
| Si | -0.71515 | 1.04525  | -0.02302 |
| O  | -0.10420 | -0.19953 | -0.89224 |
| H  | 0.68769  | -0.58955 | -0.36748 |
| O  | -0.79851 | 2.45337  | -0.85240 |
| O  | 0.20158  | 1.19023  | 1.31269  |
| H  | 0.88577  | 0.46331  | 1.30226  |
| H  | 0.03279  | 2.89718  | -1.03132 |
| O  | 1.80086  | -0.82539 | 0.67917  |

|    |          |          |          |
|----|----------|----------|----------|
| H  | 1.60945  | -1.61929 | 1.18427  |
| Si | -3.29088 | -0.51202 | 0.01002  |
| O  | -2.48038 | -1.61393 | -0.87764 |
| H  | -1.55277 | -1.35724 | -1.03676 |
| O  | -4.65042 | -0.01471 | -0.74027 |
| O  | -3.89830 | -1.13400 | 1.38990  |
| H  | -3.27383 | -1.46430 | 2.03823  |
| O  | -2.28321 | 0.73235  | 0.32134  |
| H  | -4.56925 | 0.27086  | -1.65199 |
| H  | 4.90282  | 0.71070  | 1.66116  |
| H  | 3.35976  | -0.05284 | 1.20378  |
| N  | 4.34279  | 0.18492  | 1.01574  |
| C  | 4.85972  | -0.32382 | -0.09345 |
| N  | 4.06214  | -1.03737 | -0.87476 |
| N  | 6.14191  | -0.13252 | -0.40921 |
| H  | 4.40748  | -1.48197 | -1.70523 |
| H  | 3.10129  | -1.17445 | -0.53103 |
| H  | 6.49477  | -0.42866 | -1.30134 |
| H  | 6.71282  | 0.49180  | 0.13132  |

*09\_sg-p1.mol2*

E = -1391.547262

H = -1391.329572

G = -1391.405049

G(quasi-RRHO) = -1391.399462

|    |          |          |          |
|----|----------|----------|----------|
| Si | -0.75833 | 1.08341  | -0.02140 |
| O  | -0.12519 | -0.11928 | -0.93342 |
| H  | 0.68283  | -0.50133 | -0.42885 |
| O  | -0.89856 | 2.50852  | -0.81298 |
| O  | 0.17697  | 1.22178  | 1.30185  |
| H  | 0.87704  | 0.51023  | 1.26581  |
| H  | -0.08383 | 2.97945  | -0.99871 |
| O  | 1.80715  | -0.74518 | 0.60750  |
| H  | 1.61787  | -1.55954 | 1.08016  |
| Si | -3.28186 | -0.55704 | 0.02146  |
| O  | -2.45023 | -1.61633 | -0.89793 |
| H  | -1.53592 | -1.32372 | -1.07131 |
| O  | -4.66817 | -0.09163 | -0.69998 |
| O  | -3.84697 | -1.22245 | 1.39905  |
| H  | -3.20174 | -1.53369 | 2.03640  |
| O  | -2.31003 | 0.71356  | 0.34044  |
| H  | -4.61019 | 0.20474  | -1.61007 |
| H  | 4.98476  | 0.50305  | 1.76520  |

|   |         |          |          |
|---|---------|----------|----------|
| H | 3.39707 | -0.07065 | 1.20482  |
| N | 4.39443 | 0.12402  | 1.04771  |
| C | 4.90166 | -0.34105 | -0.08640 |
| N | 4.07634 | -0.94636 | -0.92746 |
| N | 6.19693 | -0.20242 | -0.36869 |
| H | 4.38987 | -1.27863 | -1.82064 |
| H | 3.10146 | -1.04384 | -0.60866 |
| H | 6.57507 | -0.54080 | -1.23477 |
| H | 6.80484 | 0.31321  | 0.24105  |

*10\_cg-p1.mol2*

E = -1391.552283  
H = -1391.333156  
G = -1391.404898  
G(quasi-RRHO) = -1391.401173

|    |          |          |          |
|----|----------|----------|----------|
| Si | -0.28803 | 0.97910  | 0.11378  |
| O  | 0.61281  | 0.86504  | 1.48417  |
| H  | 1.33582  | 1.50982  | 1.49381  |
| O  | 0.24540  | -0.09731 | -0.99077 |
| O  | -0.27071 | 2.51785  | -0.43010 |
| H  | 0.62711  | 2.87655  | -0.47539 |
| H  | 1.24144  | -0.19077 | -1.04961 |
| O  | 2.53680  | 2.34085  | 0.07930  |
| H  | 3.32002  | 2.89257  | 0.14657  |
| Si | -2.85845 | -0.58873 | -0.03883 |
| O  | -3.52494 | -1.30659 | 1.26510  |
| H  | -2.93771 | -1.61724 | 1.95714  |
| O  | -2.06049 | -1.63288 | -0.99604 |
| O  | -4.09967 | 0.01520  | -0.90279 |
| H  | -4.80431 | 0.45852  | -0.42653 |
| O  | -1.82711 | 0.58518  | 0.44290  |
| H  | -1.15068 | -1.35523 | -1.19592 |
| H  | 2.81549  | 1.47990  | -0.31571 |
| N  | 2.94769  | -0.25104 | -0.93644 |
| C  | 3.41629  | -1.11604 | -0.07665 |
| H  | 3.48234  | -0.25278 | -1.79571 |
| N  | 2.76273  | -1.32403 | 1.08710  |
| H  | 3.23295  | -1.78594 | 1.84484  |
| H  | 2.01265  | -0.69115 | 1.32816  |
| N  | 4.55179  | -1.83513 | -0.26643 |
| H  | 4.70479  | -2.66028 | 0.28754  |
| H  | 4.94087  | -1.86026 | -1.19243 |

*11\_cg-p1.mol2*

E = -1391.552284

H = -1391.333151

G = -1391.404874

G(quasi-RRHO) = -1391.401154

|    |          |          |          |
|----|----------|----------|----------|
| Si | -0.28863 | 0.98049  | 0.11327  |
| O  | 0.61379  | 0.86784  | 1.48255  |
| H  | 1.33899  | 1.51050  | 1.48742  |
| O  | 0.24533  | -0.09414 | -0.99280 |
| O  | -0.27480 | 2.51941  | -0.43058 |
| H  | 0.62182  | 2.88047  | -0.47717 |
| H  | 1.24127  | -0.18903 | -1.05020 |
| O  | 2.53675  | 2.34070  | 0.08001  |
| H  | 3.31928  | 2.89245  | 0.15446  |
| Si | -2.85737 | -0.58998 | -0.03843 |
| O  | -3.52122 | -1.31072 | 1.26538  |
| H  | -2.93262 | -1.61888 | 1.95739  |
| O  | -2.05957 | -1.63114 | -0.99889 |
| O  | -4.10076 | 0.01391  | -0.89940 |
| H  | -4.80668 | 0.45225  | -0.42038 |
| O  | -1.82664 | 0.58410  | 0.44414  |
| H  | -1.14982 | -1.35295 | -1.19827 |
| H  | 2.81820  | 1.48065  | -0.31467 |
| N  | 2.94753  | -0.25175 | -0.93634 |
| C  | 3.41576  | -1.11672 | -0.07636 |
| H  | 3.48151  | -0.25464 | -1.79601 |
| N  | 2.76318  | -1.32299 | 1.08803  |
| H  | 3.23175  | -1.78783 | 1.84494  |
| H  | 2.01258  | -0.69077 | 1.32892  |
| N  | 4.55076  | -1.83697 | -0.26641 |
| H  | 4.70200  | -2.66292 | 0.28692  |
| H  | 4.93787  | -1.86387 | -1.19322 |

*12\_cg-p2.mol2*

E = -1391.547278

H = -1391.328801

G = -1391.403954

G(quasi-RRHO) = -1391.399046

|    |          |          |          |
|----|----------|----------|----------|
| Si | -0.21109 | -0.52107 | 0.07360  |
| O  | 0.67983  | -0.06714 | 1.38278  |
| H  | 0.28863  | -0.18660 | 2.25217  |
| O  | 0.74057  | -0.37215 | -1.20553 |

|    |          |          |          |
|----|----------|----------|----------|
| O  | -1.54911 | 0.39534  | -0.02774 |
| H  | 1.68049  | -0.01764 | -1.11398 |
| O  | 1.92549  | 2.56051  | 0.60164  |
| H  | 1.38145  | 1.95591  | 1.11878  |
| H  | 3.67961  | 0.83300  | -1.84984 |
| H  | 2.41279  | 1.96280  | 0.00311  |
| O  | -0.80898 | -2.04347 | 0.24400  |
| H  | -0.20867 | -2.78644 | 0.15264  |
| Si | -3.16843 | 0.21175  | -0.12521 |
| O  | -3.93358 | 1.05069  | 1.04176  |
| H  | -3.90486 | 0.69712  | 1.93256  |
| O  | -3.51835 | -1.37884 | -0.04864 |
| H  | -2.74379 | -1.95118 | 0.04993  |
| O  | -3.74937 | 0.91591  | -1.47337 |
| H  | -3.39006 | 0.63043  | -2.31533 |
| N  | 3.24912  | 0.51823  | -0.98996 |
| C  | 4.09911  | -0.09774 | -0.21929 |
| N  | 3.71150  | -0.51924 | 1.00673  |
| N  | 5.38795  | -0.36667 | -0.56250 |
| H  | 2.72796  | -0.46855 | 1.22962  |
| H  | 4.24912  | -1.22570 | 1.47653  |
| H  | 5.76083  | 0.10500  | -1.36786 |
| H  | 6.05309  | -0.54440 | 0.17101  |

*13\_sg-p1.mol2*

E = -1391.548323  
H = -1391.330529  
G = -1391.403011  
G(quasi-RRHO) = -1391.398933

|    |          |          |          |
|----|----------|----------|----------|
| Si | -0.52758 | 0.73161  | 0.56917  |
| O  | -1.14752 | 0.20597  | 2.02981  |
| H  | -0.53860 | 0.16932  | 2.76943  |
| O  | 0.36793  | -0.51899 | -0.08254 |
| O  | 0.29876  | 2.05137  | 0.61581  |
| H  | 1.51493  | 2.22431  | -0.30386 |
| H  | -0.17036 | -1.24946 | -0.40993 |
| O  | 2.34524  | 2.33186  | -0.88324 |
| H  | 2.03429  | 2.43348  | -1.78567 |
| Si | -3.06791 | -0.38850 | -0.38808 |
| O  | -3.72153 | -0.61986 | 1.09164  |
| H  | -3.07570 | -0.45610 | 1.79451  |
| O  | -2.28079 | -1.71475 | -0.95081 |
| O  | -4.26248 | -0.04086 | -1.43737 |

|   |          |          |          |
|---|----------|----------|----------|
| H | -4.93938 | 0.57667  | -1.15325 |
| O | -1.92597 | 0.76014  | -0.32754 |
| H | -2.73870 | -2.55754 | -0.93166 |
| H | 2.19718  | -0.84145 | 0.03438  |
| N | 3.08862  | -1.30305 | 0.21210  |
| H | 3.05214  | -2.22961 | 0.59819  |
| C | 4.26296  | -0.76893 | -0.09355 |
| N | 5.37577  | -1.48910 | 0.08153  |
| N | 4.34282  | 0.45632  | -0.58310 |
| H | 6.27856  | -1.05848 | -0.00445 |
| H | 5.33620  | -2.39538 | 0.51148  |
| H | 5.24457  | 0.82908  | -0.82290 |
| H | 3.52446  | 1.07698  | -0.69005 |

One  $\text{CH}_3\text{NH}_3^+$

RC-ma, Reactant Complexes

*00\_sma-c.mol2*

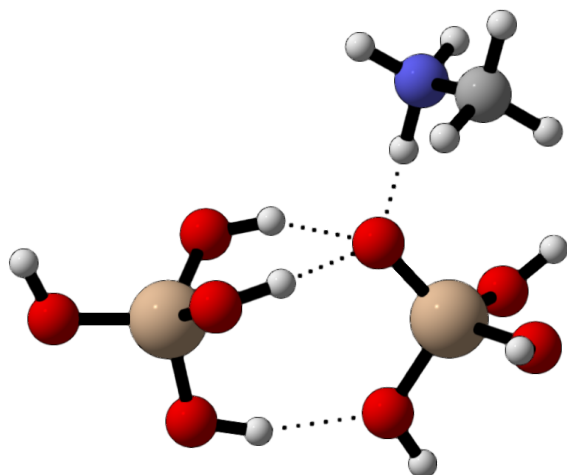

E = -1282.017323  
H = -1281.809968  
G = -1281.879023  
G(quasi-RRHO) = -1281.875039

|    |          |          |          |
|----|----------|----------|----------|
| Si | -1.33742 | -1.20584 | 0.02105  |
| O  | -0.03544 | -2.17015 | -0.35121 |
| H  | -0.22918 | -3.09793 | -0.50390 |
| O  | -0.80216 | 0.27318  | 0.22519  |
| O  | -2.49595 | -1.33999 | -1.14783 |
| H  | -2.38895 | -0.77340 | -1.91421 |
| H  | 0.50944  | 0.90815  | -0.93085 |

|    |          |          |          |
|----|----------|----------|----------|
| O  | -2.00750 | -1.93656 | 1.33627  |
| H  | -2.90018 | -1.67460 | 1.56803  |
| Si | 2.38169  | 0.33255  | -0.02084 |
| O  | 3.88834  | 0.95826  | -0.02417 |
| H  | 3.97355  | 1.89535  | 0.15965  |
| O  | 2.63272  | -1.25144 | -0.33416 |
| O  | 1.65537  | 0.56250  | 1.43012  |
| H  | 0.68582  | 0.50333  | 1.30647  |
| O  | 1.44948  | 1.03902  | -1.16941 |
| H  | 1.79705  | -1.74685 | -0.37698 |
| N  | -2.22753 | 2.38965  | 0.60061  |
| H  | -1.62872 | 1.48031  | 0.46942  |
| H  | -1.59744 | 3.17874  | 0.71543  |
| C  | -3.12591 | 2.59085  | -0.55978 |
| H  | -2.51927 | 2.68568  | -1.45347 |
| H  | -3.77364 | 1.72592  | -0.64984 |
| H  | -3.72114 | 3.48633  | -0.41986 |
| H  | -2.75796 | 2.30375  | 1.46324  |

*01\_sma-c.mol2*

E = -1282.016845  
H = -1281.809116  
G = -1281.877943  
G(quasi-RRHO) = -1281.873936

|    |          |          |          |
|----|----------|----------|----------|
| Si | -1.32750 | -1.17597 | 0.00568  |
| O  | -0.23902 | -1.85547 | -1.04838 |
| H  | -0.41466 | -2.75944 | -1.32054 |
| O  | -0.77137 | 0.21222  | 0.52779  |
| O  | -2.77429 | -0.86897 | -0.73991 |
| H  | -3.32563 | -1.62084 | -0.96468 |
| H  | 0.45932  | 1.15487  | -0.50333 |
| O  | -1.54965 | -2.36933 | 1.12190  |
| H  | -2.22222 | -2.21951 | 1.78909  |
| Si | 2.36654  | 0.30294  | 0.01682  |
| O  | 3.90181  | 0.85267  | 0.05644  |
| H  | 4.06673  | 1.65259  | 0.55860  |
| O  | 2.49614  | -1.11553 | -0.78514 |
| O  | 1.78172  | 0.11031  | 1.53528  |
| H  | 0.80280  | 0.12588  | 1.49650  |
| O  | 1.37987  | 1.34541  | -0.77477 |
| H  | 1.62957  | -1.51313 | -0.97352 |
| H  | -1.89317 | 1.26198  | 0.53416  |
| H  | -3.11126 | 2.17408  | 1.32433  |

|   |          |         |          |
|---|----------|---------|----------|
| H | -3.45504 | 1.32883 | -0.04363 |
| C | -2.42921 | 3.10263 | -0.40491 |
| H | -2.05484 | 2.77154 | -1.36726 |
| H | -3.31787 | 3.70831 | -0.54317 |
| H | -1.66553 | 3.67827 | 0.10595  |
| N | -2.75303 | 1.91039 | 0.41088  |

*02\_sma-c.mol2*

E = -1282.016803  
H = -1281.809113  
G = -1281.877932  
G(quasi-RRHO) = -1281.873963

|    |          |          |          |
|----|----------|----------|----------|
| Si | 1.34995  | -1.17047 | 0.00524  |
| O  | 0.22784  | -1.87484 | -1.00378 |
| H  | 0.42895  | -2.76234 | -1.31046 |
| O  | 0.77106  | 0.21656  | 0.50597  |
| O  | 1.75354  | -2.28239 | 1.15438  |
| H  | 1.03221  | -2.70934 | 1.62041  |
| H  | -0.79749 | 0.15709  | 1.48811  |
| O  | 2.77152  | -0.88046 | -0.78261 |
| H  | 3.35687  | -1.62573 | -0.92948 |
| Si | -2.36969 | 0.29247  | 0.01345  |
| O  | -3.90421 | 0.84473  | 0.04831  |
| H  | -4.06564 | 1.65611  | 0.53290  |
| O  | -2.50534 | -1.14778 | -0.74766 |
| O  | -1.38637 | 1.31099  | -0.81232 |
| H  | -0.46423 | 1.12477  | -0.54166 |
| O  | -1.77587 | 0.14109  | 1.53341  |
| H  | -1.63866 | -1.54730 | -0.93220 |
| H  | 1.88349  | 1.26945  | 0.52934  |
| H  | 3.08085  | 2.19708  | 1.33477  |
| H  | 3.45159  | 1.37313  | -0.03790 |
| N  | 2.73374  | 1.93439  | 0.41673  |
| C  | 2.39093  | 3.12722  | -0.39054 |
| H  | 1.61279  | 3.68248  | 0.12108  |
| H  | 3.26787  | 3.75203  | -0.51814 |
| H  | 2.02873  | 2.79718  | -1.35789 |

*03\_sma-c.mol2*

E = -1282.014354  
H = -1281.806449  
G = -1281.875427



G(quasi-RRHO) = -1281.871768

|    |          |          |          |
|----|----------|----------|----------|
| Si | -2.27727 | -0.48928 | 0.02444  |
| O  | -1.99859 | 1.07549  | -0.49767 |
| H  | -2.76181 | 1.54908  | -0.83667 |
| O  | -0.94314 | -1.09825 | 0.59243  |
| O  | -3.52846 | -0.46493 | 1.10855  |
| H  | -3.26810 | -0.41778 | 2.03024  |
| H  | 0.33753  | -0.34747 | 1.09820  |
| O  | -2.92101 | -1.20720 | -1.31632 |
| H  | -3.34060 | -2.05858 | -1.18086 |
| Si | 2.17936  | -0.72720 | 0.01253  |
| O  | 3.62548  | -1.28019 | 0.53480  |
| H  | 3.62813  | -2.11179 | 1.01314  |
| O  | 2.53778  | 0.45685  | -1.07129 |
| O  | 1.28424  | -1.94281 | -0.59767 |
| H  | 0.34174  | -1.82183 | -0.31517 |
| O  | 1.28301  | 0.01803  | 1.15849  |
| H  | 3.20824  | 0.27562  | -1.73293 |
| H  | -0.46631 | 1.97582  | -0.39642 |
| H  | 0.85314  | 1.74655  | 0.56057  |
| H  | 1.07982  | 2.19797  | -0.98300 |
| C  | 0.41928  | 3.78463  | 0.21149  |
| H  | 1.42026  | 4.12836  | 0.44617  |
| H  | 0.01280  | 4.36252  | -0.61066 |
| H  | -0.21869 | 3.88363  | 1.08232  |
| N  | 0.47349  | 2.35784  | -0.17887 |

*04\_sma-c.mol2*

E = -1282.009382

H = -1281.801506

G = -1281.871494

G(quasi-RRHO) = -1281.867033

|    |          |          |          |
|----|----------|----------|----------|
| Si | 2.42525  | 0.50735  | -0.08352 |
| O  | 1.99606  | -0.29837 | 1.31585  |
| H  | 2.64745  | -0.30265 | 2.02051  |
| O  | 1.21918  | 0.45380  | -1.09516 |
| O  | 2.92048  | 2.03788  | 0.31468  |
| H  | 2.23583  | 2.70866  | 0.28865  |
| H  | -0.24471 | 0.61400  | -0.58991 |
| O  | 3.81944  | -0.25343 | -0.53907 |
| H  | 4.32502  | 0.17174  | -1.23401 |
| Si | -1.09811 | -1.27693 | 0.00564  |

|   |          |          |          |
|---|----------|----------|----------|
| O | -2.58682 | -1.93893 | 0.05307  |
| H | -3.09843 | -1.92936 | -0.75788 |
| O | -0.47016 | -1.63253 | 1.46882  |
| O | -0.20892 | -1.88436 | -1.22701 |
| H | 0.47927  | -1.22044 | -1.44972 |
| O | -1.16352 | 0.35090  | -0.23134 |
| H | 0.41187  | -1.23748 | 1.59252  |
| H | -2.28238 | 1.50078  | 0.12128  |
| H | -3.12092 | 2.34071  | 1.30810  |
| H | -2.78789 | 3.08373  | -0.11319 |
| N | -3.05441 | 2.19460  | 0.30361  |
| C | -4.34105 | 1.70650  | -0.25550 |
| H | -4.57950 | 0.75630  | 0.20781  |
| H | -5.12085 | 2.43027  | -0.04975 |
| H | -4.22360 | 1.57714  | -1.32500 |

*05\_sma-c.mol2*

E = -1282.009405  
H = -1281.801192  
G = -1281.871403  
G(quasi-RRHO) = -1281.867025

|    |          |          |          |
|----|----------|----------|----------|
| Si | 2.54807  | 0.48715  | -0.05728 |
| O  | 2.13346  | -0.45892 | 1.25789  |
| H  | 2.80235  | -0.55327 | 1.93954  |
| O  | 1.32675  | 0.55434  | -1.04760 |
| O  | 3.06806  | 1.96181  | 0.49315  |
| H  | 2.39053  | 2.63801  | 0.54915  |
| H  | -0.19372 | 0.83305  | -0.52243 |
| O  | 3.92816  | -0.23723 | -0.60801 |
| H  | 4.43025  | 0.25466  | -1.26011 |
| Si | -1.05222 | -1.06753 | -0.00593 |
| O  | -2.61935 | -1.54713 | -0.05920 |
| H  | -2.88621 | -2.27128 | 0.51039  |
| O  | -0.43713 | -1.54411 | 1.42728  |
| O  | -0.20485 | -1.66031 | -1.26923 |
| H  | 0.51668  | -1.01384 | -1.45245 |
| O  | -1.09653 | 0.56854  | -0.16443 |
| H  | 0.49461  | -1.27664 | 1.53611  |
| H  | -2.71978 | 1.17631  | -0.47302 |
| H  | -4.05370 | 1.38450  | -1.46127 |
| H  | -3.94840 | 0.11462  | -0.41101 |
| C  | -4.42263 | 1.93083  | 0.51578  |
| H  | -4.16715 | 2.97198  | 0.35779  |

|   |          |         |          |
|---|----------|---------|----------|
| H | -5.49522 | 1.79414 | 0.44483  |
| H | -4.06843 | 1.60506 | 1.48690  |
| N | -3.75663 | 1.11244 | -0.52756 |

*06\_sma-c.mol2*

E = -1282.014006  
H = -1281.805485  
G = -1281.871396  
G(quasi-RRHO) = -1281.868848

|    |          |          |          |
|----|----------|----------|----------|
| Si | 1.80352  | -0.82029 | -0.11051 |
| O  | 1.07503  | -1.38572 | 1.27727  |
| H  | 1.64573  | -1.58330 | 2.02318  |
| O  | 0.75123  | -0.72013 | -1.26988 |
| O  | 2.40249  | 0.71073  | 0.21813  |
| H  | 3.18462  | 0.75015  | 0.77397  |
| H  | -0.40792 | 0.36245  | -1.08805 |
| O  | 3.09670  | -1.82464 | -0.29834 |
| H  | 3.67038  | -1.65682 | -1.04836 |
| Si | -2.07410 | -0.43468 | -0.00745 |
| O  | -3.67128 | -0.12247 | 0.07028  |
| H  | -4.12170 | 0.07039  | -0.75399 |
| O  | -1.64372 | -0.61218 | 1.55796  |
| O  | -1.75985 | -1.78037 | -0.88582 |
| H  | -0.82923 | -1.73303 | -1.19038 |
| O  | -1.24924 | 0.79592  | -0.72776 |
| H  | -0.72139 | -0.90385 | 1.66079  |
| H  | -0.38956 | 2.10293  | 0.12341  |
| H  | 0.18740  | 2.93194  | 1.45200  |
| H  | 1.22289  | 2.06599  | 0.47878  |
| N  | 0.39157  | 2.68483  | 0.48738  |
| C  | 0.60473  | 3.89176  | -0.34702 |
| H  | 1.44338  | 4.45419  | 0.04683  |
| H  | 0.81580  | 3.57539  | -1.36225 |
| H  | -0.29242 | 4.49960  | -0.32869 |

TS1-ma, Si-O bond association

*00\_sma-d.mol2*

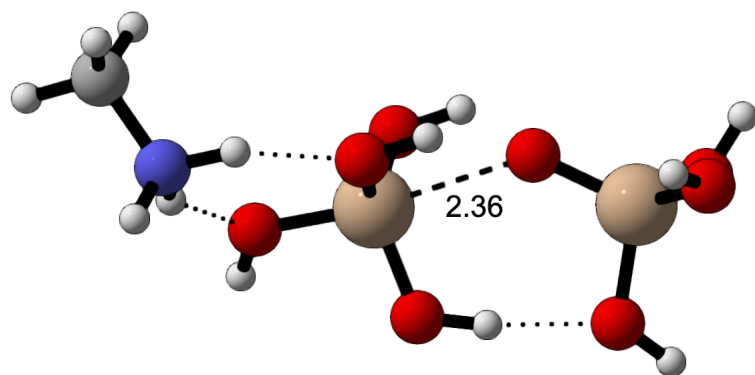

E = -1282.004286  
H = -1281.796259  
G = -1281.864994  
G(quasi-RRHO) = -1281.860848

|    |          |          |          |
|----|----------|----------|----------|
| Si | 0.85217  | -0.70933 | 0.07705  |
| O  | 0.04595  | -1.43673 | -1.14543 |
| H  | -0.89918 | -1.23598 | -1.23792 |
| O  | 1.30786  | 0.87412  | -0.11308 |
| O  | 0.50601  | -1.20556 | 1.60757  |
| H  | -0.32726 | -0.78400 | 1.85572  |
| H  | 0.51736  | 1.40556  | 0.06186  |
| O  | 2.38720  | -1.36540 | -0.14214 |
| H  | 2.40805  | -2.29122 | -0.38898 |
| Si | -2.61009 | 0.40294  | 0.02522  |
| O  | -3.73377 | -0.27168 | 1.03173  |
| H  | -4.10351 | 0.30617  | 1.70137  |
| O  | -2.61000 | -0.62043 | -1.28886 |
| O  | -3.27885 | 1.86155  | -0.38342 |
| H  | -2.65327 | 2.53005  | -0.66823 |
| O  | -1.12350 | 0.49622  | 0.53194  |
| H  | -3.44914 | -0.97466 | -1.58739 |
| H  | 3.12037  | 1.28567  | -0.48617 |
| N  | 4.02188  | 0.80016  | -0.59477 |
| H  | 4.37754  | 0.97092  | -1.53143 |
| C  | 5.00292  | 1.19292  | 0.44423  |
| H  | 5.91051  | 0.61622  | 0.30921  |
| H  | 5.21624  | 2.25126  | 0.34994  |
| H  | 4.57385  | 0.98634  | 1.41796  |
| H  | 3.74158  | -0.19224 | -0.51623 |

*01\_sma-d.mol2*

E = -1282.004288

H = -1281.796217  
G = -1281.864122  
G(quasi-RRHO) = -1281.860442

|    |          |          |          |
|----|----------|----------|----------|
| Si | -0.85079 | -0.79011 | -0.02360 |
| O  | -0.22490 | -0.85125 | 1.48565  |
| H  | 0.70145  | -0.58311 | 1.59538  |
| O  | -1.31219 | 0.68494  | -0.62607 |
| O  | -0.30409 | -1.89749 | -1.11127 |
| H  | 0.55842  | -1.58637 | -1.41615 |
| H  | -0.49965 | 1.12161  | -0.92151 |
| O  | -2.40708 | -1.35971 | 0.27290  |
| H  | -2.47122 | -2.06202 | 0.92183  |
| Si | 2.58281  | 0.41263  | -0.04430 |
| O  | 3.83014  | -0.57047 | -0.50099 |
| H  | 4.29733  | -0.31758 | -1.29899 |
| O  | 2.39845  | 0.07361  | 1.57586  |
| O  | 3.19675  | 1.93729  | -0.24537 |
| H  | 2.54154  | 2.62716  | -0.36429 |
| O  | 1.17958  | 0.18882  | -0.71958 |
| H  | 3.18716  | -0.05460 | 2.10526  |
| H  | -4.62378 | 0.56735  | -1.35617 |
| H  | -3.15102 | 1.09082  | -0.77714 |
| H  | -3.79536 | -0.23597 | -0.14828 |
| C  | -4.76715 | 1.51609  | 0.49496  |
| H  | -4.97422 | 2.49337  | 0.07493  |
| H  | -5.69295 | 1.02507  | 0.77092  |
| H  | -4.12622 | 1.61390  | 1.36357  |
| N  | -4.06431 | 0.69182  | -0.51681 |

*02\_sma-d.mol2*

E = -1282.000484  
H = -1281.792264  
G = -1281.859940  
G(quasi-RRHO) = -1281.855906

|    |         |          |          |
|----|---------|----------|----------|
| Si | 2.43999 | -0.34699 | 0.02399  |
| O  | 1.32331 | -1.29538 | -0.77146 |
| H  | 1.74057 | -2.02997 | -1.22910 |
| O  | 2.88422 | 1.06779  | -0.69122 |
| O  | 2.35778 | -0.39071 | 1.66723  |
| H  | 1.60394 | 0.15569  | 1.92470  |
| H  | 2.16564 | 1.69604  | -0.54117 |
| O  | 3.78072 | -1.29535 | -0.28029 |

|    |          |          |          |
|----|----------|----------|----------|
| H  | 4.62847  | -0.86612 | -0.15861 |
| Si | -0.90834 | 0.95071  | -0.00353 |
| O  | -1.99131 | 0.93534  | 1.27212  |
| H  | -1.57695 | 0.86208  | 2.13465  |
| O  | -1.24200 | -0.42421 | -0.87924 |
| O  | -1.45984 | 2.14745  | -0.99818 |
| H  | -1.55428 | 3.01539  | -0.60182 |
| O  | 0.59428  | 1.01553  | 0.45457  |
| H  | -0.41478 | -0.93509 | -0.97385 |
| H  | -3.36624 | -0.54902 | 1.04527  |
| H  | -3.43850 | -2.20042 | 0.92839  |
| H  | -2.68186 | -1.26120 | -0.23105 |
| C  | -4.78763 | -1.23937 | -0.33786 |
| H  | -4.85607 | -2.06987 | -1.03067 |
| H  | -5.60870 | -1.27398 | 0.36857  |
| H  | -4.80387 | -0.30139 | -0.88084 |
| N  | -3.50456 | -1.33453 | 0.39972  |

*03\_sma-d.mol2*

E = -1282.003031

H = -1281.794117

G = -1281.857376

G(quasi-RRHO) = -1281.855474

|    |          |          |          |
|----|----------|----------|----------|
| Si | -1.50886 | -0.92756 | -0.01171 |
| O  | -0.99686 | -0.13448 | 1.35245  |
| H  | -0.07451 | -0.27965 | 1.60753  |
| O  | -1.53053 | -0.03330 | -1.42260 |
| O  | -1.34319 | -2.56672 | -0.10587 |
| H  | -0.43111 | -2.76491 | -0.34427 |
| H  | -0.66628 | -0.13863 | -1.83912 |
| O  | -3.14064 | -0.81447 | 0.35662  |
| H  | -3.72096 | -0.99948 | -0.38288 |
| Si | 1.91257  | -0.32938 | -0.04950 |
| O  | 3.37964  | -0.96095 | -0.43964 |
| H  | 3.58445  | -1.04465 | -1.37296 |
| O  | 1.84624  | -0.36736 | 1.60775  |
| O  | 1.90002  | 1.27184  | -0.53004 |
| H  | 2.73247  | 1.74752  | -0.48245 |
| O  | 0.63004  | -1.05266 | -0.59768 |
| H  | 2.41665  | 0.22561  | 2.10072  |
| H  | -1.20644 | 1.92154  | -0.81500 |
| H  | -0.90402 | 1.84787  | 0.77657  |
| H  | 0.32271  | 2.19016  | -0.26353 |

|   |          |         |          |
|---|----------|---------|----------|
| N | -0.67495 | 2.38225 | -0.06879 |
| C | -0.97003 | 3.82765 | 0.05526  |
| H | -0.37788 | 4.23822 | 0.86496  |
| H | -0.71467 | 4.31954 | -0.87619 |
| H | -2.02527 | 3.95730 | 0.26548  |

IM1-ma, three equatorial OH groups

[00\\_sma-e.mol2](#)

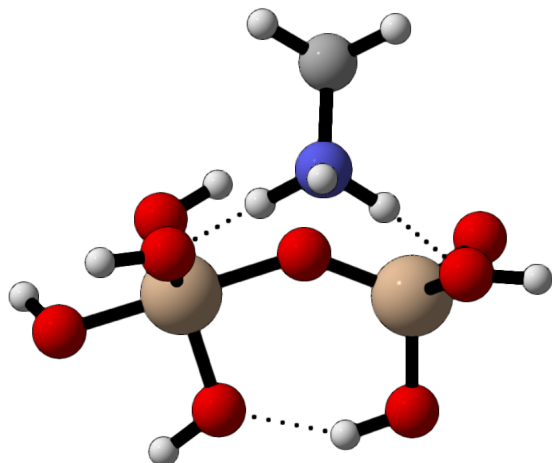

E = -1282.019407  
H = -1281.809771  
G = -1281.874634  
G(quasi-RRHO) = -1281.871893

|    |          |          |          |
|----|----------|----------|----------|
| Si | 1.61070  | -0.05363 | 0.07809  |
| O  | 1.50810  | -1.37692 | -0.97763 |
| H  | 2.38133  | -1.59716 | -1.30898 |
| O  | 1.32490  | 1.48698  | -0.58320 |
| O  | 1.93719  | -0.23847 | 1.71810  |
| H  | 1.12705  | -0.34049 | 2.22053  |
| H  | 2.15532  | 1.89180  | -0.84401 |
| O  | 3.32685  | 0.09991  | -0.25368 |
| H  | 3.84158  | 0.07998  | 0.55337  |
| Si | -1.40135 | -1.05012 | 0.01809  |
| O  | -0.99037 | -2.33072 | -0.91069 |
| H  | -0.04613 | -2.24901 | -1.14864 |
| O  | -2.43937 | -0.01974 | -0.76059 |
| O  | -2.27944 | -1.59154 | 1.29589  |
| H  | -1.98609 | -2.41073 | 1.69941  |
| O  | -0.13197 | -0.16414 | 0.39879  |

|   |          |          |          |
|---|----------|----------|----------|
| H | -3.35022 | -0.29803 | -0.87435 |
| N | -1.18342 | 2.51530  | -0.67314 |
| H | -1.77795 | 1.68489  | -0.81402 |
| H | -1.33484 | 3.15858  | -1.44469 |
| H | -0.19095 | 2.17677  | -0.69803 |
| C | -1.47907 | 3.15354  | 0.63018  |
| H | -0.82913 | 4.01114  | 0.76274  |
| H | -2.51648 | 3.46783  | 0.65327  |
| H | -1.29329 | 2.42570  | 1.41187  |

*01\_sma-e.mol2*

E = -1282.017108  
H = -1281.807790  
G = -1281.873130  
G(quasi-RRHO) = -1281.870179

|    |          |          |          |
|----|----------|----------|----------|
| Si | -0.48132 | -0.76784 | -0.11206 |
| O  | 0.17659  | -1.30247 | 1.35702  |
| H  | -0.51991 | -1.58333 | 1.95407  |
| O  | -0.94234 | 0.85564  | -0.17352 |
| O  | -0.71352 | -1.82499 | -1.39765 |
| H  | 0.07577  | -1.87449 | -1.94023 |
| H  | -0.19884 | 1.44250  | -0.34407 |
| O  | -2.12782 | -1.17064 | 0.45027  |
| H  | -2.45891 | -1.94623 | -0.00593 |
| Si | 2.35182  | 0.41522  | -0.04928 |
| O  | 2.64897  | -0.10374 | 1.47731  |
| H  | 1.87523  | -0.60774 | 1.78741  |
| O  | 1.87843  | 1.99432  | -0.09110 |
| O  | 3.75163  | 0.34939  | -0.89931 |
| H  | 4.27729  | -0.44674 | -0.80075 |
| O  | 1.15042  | -0.40970 | -0.70999 |
| H  | 2.39657  | 2.63807  | 0.39514  |
| N  | -3.60834 | 1.02467  | 0.53124  |
| H  | -3.17287 | 0.05774  | 0.56420  |
| H  | -3.92423 | 1.29333  | 1.45827  |
| H  | -2.80091 | 1.59849  | 0.27696  |
| C  | -4.69762 | 1.11528  | -0.46509 |
| H  | -5.06242 | 2.13492  | -0.51685 |
| H  | -4.30737 | 0.81398  | -1.43088 |
| H  | -5.50108 | 0.44936  | -0.17102 |



02\_sma-e.mol2

E = -1282.016668

H = -1281.806913

G = -1281.870723

G(quasi-RRHO) = -1281.868166

|    |          |          |          |
|----|----------|----------|----------|
| Si | 0.47502  | -0.25344 | -0.03016 |
| O  | -0.11850 | -1.61317 | 0.78928  |
| H  | 0.50866  | -2.33678 | 0.82735  |
| O  | 0.06940  | -0.08776 | -1.66706 |
| O  | 1.42269  | 0.89742  | 0.75911  |
| H  | 0.85857  | 1.57635  | 1.13472  |
| H  | 0.74605  | -0.41662 | -2.26066 |
| O  | 2.00990  | -1.08259 | -0.42845 |
| H  | 1.92962  | -1.89218 | -0.93493 |
| Si | -2.50146 | 0.27131  | 0.05516  |
| O  | -2.88106 | -1.18283 | 0.72478  |
| H  | -2.05917 | -1.66541 | 0.91161  |
| O  | -2.70725 | 0.28319  | -1.57359 |
| O  | -3.59115 | 1.36657  | 0.60276  |
| H  | -3.85791 | 1.27460  | 1.51909  |
| O  | -0.97393 | 0.63356  | 0.40827  |
| H  | -1.84083 | 0.17166  | -1.99685 |
| N  | 4.09005  | 0.19294  | 0.62482  |
| H  | 3.45401  | -0.49079 | 0.14253  |
| H  | 4.55856  | -0.26610 | 1.40050  |
| H  | 3.41047  | 0.86309  | 0.99757  |
| C  | 5.05626  | 0.82402  | -0.30140 |
| H  | 5.63404  | 1.57059  | 0.23180  |
| H  | 5.71453  | 0.06019  | -0.69946 |
| H  | 4.50488  | 1.29142  | -1.10947 |

03\_sma-e.mol2

E = -1282.011174

H = -1281.802214

G = -1281.870155

G(quasi-RRHO) = -1281.866471

|    |          |          |          |
|----|----------|----------|----------|
| Si | -0.57701 | 0.44031  | 0.00098  |
| O  | 0.01924  | 1.85836  | -0.66539 |
| H  | 0.95166  | 1.80382  | -0.89547 |
| O  | -1.41299 | -0.66187 | -0.97408 |
| O  | -0.34241 | 0.20716  | 1.65112  |
| H  | 0.51726  | -0.16552 | 1.86343  |

|    |          |          |          |
|----|----------|----------|----------|
| H  | -0.79278 | -1.27966 | -1.36548 |
| O  | -2.13801 | 1.19573  | 0.33226  |
| H  | -2.11730 | 1.71887  | 1.13430  |
| Si | 2.48082  | -0.33727 | -0.05445 |
| O  | 2.78735  | -0.35373 | 1.56314  |
| H  | 3.06209  | -1.19016 | 1.94408  |
| O  | 2.93382  | 1.14320  | -0.61392 |
| O  | 3.38883  | -1.55185 | -0.67580 |
| H  | 3.17628  | -1.85052 | -1.56203 |
| O  | 0.93524  | -0.48069 | -0.39957 |
| H  | 3.81161  | 1.46389  | -0.39900 |
| H  | -3.44333 | -0.84945 | -1.09280 |
| N  | -4.11731 | -0.29113 | -0.56322 |
| H  | -4.75030 | 0.16735  | -1.21123 |
| C  | -4.84713 | -1.10212 | 0.43506  |
| H  | -5.50938 | -0.45586 | 1.00011  |
| H  | -5.42192 | -1.87170 | -0.06789 |
| H  | -4.12431 | -1.55853 | 1.10223  |
| H  | -3.47752 | 0.42504  | -0.11161 |

*04\_sma-e.mol2*

E = -1282.015615  
H = -1281.805817  
G = -1281.870089  
G(quasi-RRHO) = -1281.867199

|    |          |          |          |
|----|----------|----------|----------|
| Si | 1.47522  | 0.22399  | 0.00928  |
| O  | 1.37869  | -0.44366 | 1.56722  |
| H  | 2.24734  | -0.64633 | 1.92001  |
| O  | 1.61756  | -0.81339 | -1.31952 |
| O  | 1.27202  | 1.89039  | -0.19525 |
| H  | 2.11827  | 2.32937  | -0.29697 |
| H  | 2.54037  | -0.98858 | -1.51808 |
| O  | 3.22834  | 0.34410  | 0.05754  |
| H  | 3.58769  | 0.87915  | 0.76693  |
| Si | -1.15584 | -1.30528 | -0.01254 |
| O  | -0.92911 | -1.97494 | 1.46768  |
| H  | -0.10900 | -1.61449 | 1.84702  |
| O  | -0.72334 | -2.30082 | -1.23854 |
| O  | -2.76101 | -1.05542 | -0.21948 |
| H  | -3.26351 | -0.84204 | 0.56888  |
| O  | -0.30229 | 0.06875  | -0.11136 |
| H  | 0.15802  | -2.03866 | -1.55425 |
| N  | -1.37585 | 2.50207  | -0.59116 |

|   |          |         |          |
|---|----------|---------|----------|
| H | -1.17115 | 1.48488 | -0.45450 |
| H | -1.75911 | 2.64895 | -1.52044 |
| H | -0.43405 | 2.90143 | -0.55396 |
| C | -2.26351 | 3.04555 | 0.46135  |
| H | -2.39299 | 4.11104 | 0.30999  |
| H | -3.22269 | 2.54348 | 0.40792  |
| H | -1.80532 | 2.86200 | 1.42668  |

TS2-cma, water cleavage of IM1, CH<sub>3</sub>NH<sub>3</sub><sup>+</sup> acting as catalyst

*00\_cma-h.mol2*

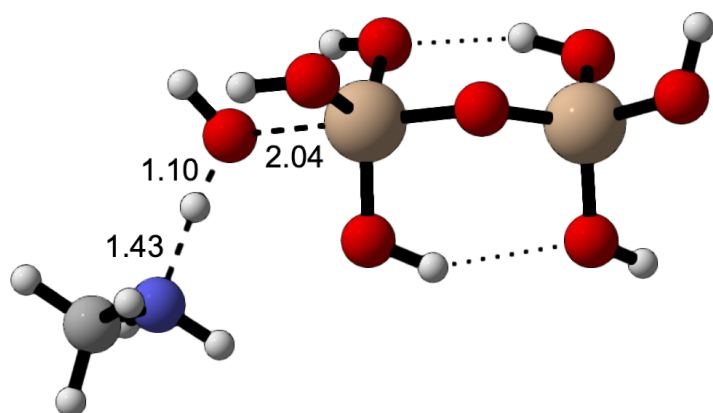

E = -1282.004980  
H = -1281.800379  
G = -1281.865763  
G(quasi-RRHO) = -1281.862454

|    |          |          |          |
|----|----------|----------|----------|
| Si | 0.38844  | -0.58355 | 0.19800  |
| O  | -0.19859 | -1.60758 | -0.98769 |
| H  | 0.46777  | -1.88322 | -1.61989 |
| O  | 0.84694  | 0.94786  | -0.25350 |
| O  | 0.91157  | -1.20491 | 1.63913  |
| H  | 1.84551  | -1.40745 | 1.68576  |
| H  | 0.11925  | 1.57572  | -0.19224 |
| O  | 2.21636  | -1.02870 | -0.57906 |
| H  | 2.61908  | -1.88087 | -0.39115 |
| Si | -2.45827 | 0.34762  | 0.04051  |
| O  | -2.82862 | -0.61259 | -1.23313 |
| H  | -2.05933 | -1.15028 | -1.47968 |
| O  | -2.06002 | 1.87854  | -0.40797 |
| O  | -3.77549 | 0.47369  | 0.99854  |
| H  | -4.27300 | -0.32965 | 1.16344  |
| O  | -1.15880 | -0.21025 | 0.80509  |

|   |          |          |          |
|---|----------|----------|----------|
| H | -2.65936 | 2.36078  | -0.98052 |
| H | 2.97485  | -0.23886 | -0.60744 |
| H | 3.22981  | 1.66353  | -0.62560 |
| H | 4.40244  | 0.92856  | -1.48928 |
| N | 3.87250  | 0.87954  | -0.62770 |
| C | 4.76744  | 0.93537  | 0.53663  |
| H | 5.44047  | 0.08250  | 0.51208  |
| H | 5.35876  | 1.84900  | 0.56392  |
| H | 4.17255  | 0.87573  | 1.44441  |

*01\_cma-h.mol2*

E = -1282.001842  
H = -1281.798379  
G = -1281.865134  
G(quasi-RRHO) = -1281.861557

|    |          |          |          |
|----|----------|----------|----------|
| Si | 0.44875  | 0.74599  | 0.10720  |
| O  | 0.88003  | 1.00552  | 1.69208  |
| H  | 1.82048  | 1.10235  | 1.83872  |
| O  | 0.79171  | -0.72304 | -0.58974 |
| O  | 0.07533  | 2.04582  | -0.85999 |
| H  | 0.83702  | 2.38178  | -1.33473 |
| H  | 0.02388  | -1.30648 | -0.64111 |
| O  | 2.36459  | 1.10199  | -0.40553 |
| H  | 2.81484  | 1.86143  | -0.02691 |
| Si | -2.44936 | -0.38354 | 0.03734  |
| O  | -3.51308 | -0.58873 | 1.26608  |
| H  | -3.14356 | -0.68455 | 2.14608  |
| O  | -1.84345 | -1.80523 | -0.53363 |
| O  | -3.31624 | 0.25185  | -1.19587 |
| H  | -3.93420 | 0.95426  | -0.98478 |
| O  | -1.18522 | 0.45469  | 0.52766  |
| H  | -2.41742 | -2.37724 | -1.04645 |
| H  | 4.42900  | -0.88082 | -1.43102 |
| H  | 3.06684  | 0.20324  | -0.51353 |
| H  | 3.07173  | -1.61358 | -0.88799 |
| N  | 3.78549  | -0.93331 | -0.65044 |
| C  | 4.48809  | -1.31858 | 0.58264  |
| H  | 4.97849  | -2.28515 | 0.48992  |
| H  | 5.23390  | -0.56489 | 0.81915  |
| H  | 3.77122  | -1.36308 | 1.39797  |

02\_cma-h.mol2

E = -1282.003765  
H = -1281.799748  
G = -1281.863738  
G(quasi-RRHO) = -1281.860913

|    |          |          |          |
|----|----------|----------|----------|
| Si | 0.38275  | 0.50146  | 0.27570  |
| O  | 1.06064  | 0.51832  | 1.78259  |
| H  | 1.97623  | 0.79575  | 1.80483  |
| O  | 0.61836  | -0.78820 | -0.75996 |
| O  | -0.21886 | 1.90565  | -0.39908 |
| H  | 0.37644  | 2.36287  | -0.99494 |
| H  | 1.28856  | -0.65763 | -1.43218 |
| O  | 2.21027  | 1.12358  | -0.43723 |
| H  | 2.48464  | 2.01361  | -0.19632 |
| Si | -2.44685 | -0.34203 | -0.02576 |
| O  | -3.72929 | -0.79457 | 0.87916  |
| H  | -3.77375 | -1.71923 | 1.12916  |
| O  | -2.12764 | -1.55317 | -1.08775 |
| O  | -2.93482 | 1.03738  | -0.76348 |
| H  | -2.19758 | 1.66121  | -0.83096 |
| O  | -1.11636 | -0.04058 | 0.84146  |
| H  | -1.17483 | -1.61560 | -1.24939 |
| H  | 3.15638  | 0.45063  | -0.49400 |
| N  | 4.23144  | -0.34736 | -0.58020 |
| H  | 5.06269  | 0.21740  | -0.44294 |
| C  | 4.19430  | -1.44952 | 0.39923  |
| H  | 3.28275  | -2.02164 | 0.25395  |
| H  | 5.05196  | -2.10932 | 0.29533  |
| H  | 4.18801  | -1.03307 | 1.40207  |
| H  | 4.29170  | -0.71562 | -1.52346 |

03\_cma-h.mol2

E = -1282.003771  
H = -1281.799751  
G = -1281.863692  
G(quasi-RRHO) = -1281.860916

|    |          |          |          |
|----|----------|----------|----------|
| Si | -0.38053 | 0.50702  | 0.26635  |
| O  | 0.22203  | 1.89192  | -0.44653 |
| H  | -0.37410 | 2.33408  | -1.05283 |
| O  | -0.62205 | -0.80821 | -0.73495 |
| O  | -1.05468 | 0.56638  | 1.77374  |
| H  | -1.97016 | 0.84467  | 1.78973  |

|    |          |          |          |
|----|----------|----------|----------|
| H  | -1.29394 | -0.69351 | -1.40834 |
| O  | -2.20926 | 1.11547  | -0.45830 |
| H  | -2.48015 | 2.01242  | -0.24033 |
| Si | 2.44274  | -0.36086 | -0.02206 |
| O  | 2.92617  | 0.99975  | -0.80419 |
| H  | 2.18940  | 1.62315  | -0.88468 |
| O  | 2.12258  | -1.60109 | -1.04410 |
| O  | 3.69536  | -0.89444 | 0.88043  |
| H  | 4.23247  | -0.22534 | 1.30852  |
| O  | 1.11835  | -0.02488 | 0.84193  |
| H  | 1.16978  | -1.66513 | -1.20306 |
| N  | -4.23837 | -0.34729 | -0.56587 |
| H  | -5.06528 | 0.22378  | -0.42849 |
| H  | -3.15863 | 0.44579  | -0.49830 |
| C  | -4.19929 | -1.43793 | 0.42623  |
| H  | -3.29415 | -2.01932 | 0.27788  |
| H  | -4.17804 | -1.00937 | 1.42375  |
| H  | -5.06342 | -2.09177 | 0.33992  |
| H  | -4.30819 | -0.72613 | -1.50426 |

TS2-sma, water cleavage of IM1, CH<sub>3</sub>NH<sub>3</sub><sup>+</sup> acting as spectator

*00\_sma-h.mol2*

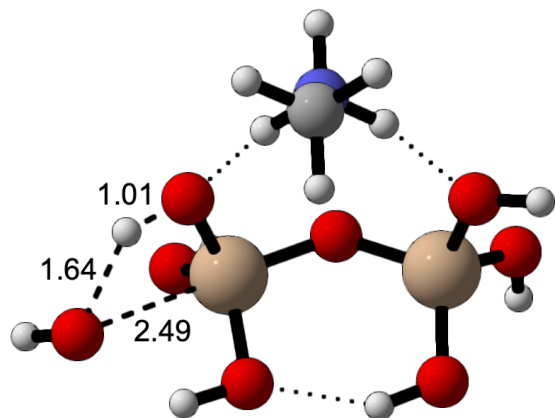

E = -1281.991699  
H = -1281.785600  
G = -1281.851757  
G(quasi-RRHO) = -1281.848780

|    |          |          |          |
|----|----------|----------|----------|
| Si | -1.23372 | -0.63574 | -0.27123 |
| O  | -1.17027 | -1.12250 | 1.30110  |
| H  | -2.09563 | -0.97783 | 1.60380  |
| O  | -1.67831 | 0.92830  | -0.53021 |

|    |          |          |          |
|----|----------|----------|----------|
| O  | -1.96793 | -1.69366 | -1.28754 |
| H  | -1.36987 | -2.16578 | -1.87094 |
| H  | -2.59166 | 0.90055  | -0.11038 |
| O  | -3.45861 | -0.19108 | 0.74973  |
| H  | -4.19378 | -0.64844 | 0.33902  |
| Si | 1.77484  | -0.70693 | 0.06432  |
| O  | 1.56876  | -1.30369 | 1.56506  |
| H  | 0.63489  | -1.31976 | 1.83523  |
| O  | 2.31409  | 0.84890  | 0.05061  |
| O  | 2.91471  | -1.57000 | -0.71549 |
| H  | 2.91172  | -2.52128 | -0.59055 |
| O  | 0.36212  | -0.64998 | -0.72218 |
| H  | 3.19620  | 1.02890  | 0.38381  |
| H  | 0.42096  | 3.21741  | -1.52255 |
| N  | 0.32450  | 2.80242  | -0.59965 |
| H  | -0.50102 | 2.16197  | -0.61018 |
| C  | 0.18013  | 3.84328  | 0.44671  |
| H  | -0.71074 | 4.42692  | 0.24465  |
| H  | 0.08944  | 3.35284  | 1.40925  |
| H  | 1.05429  | 4.48404  | 0.43843  |
| H  | 1.15066  | 2.21088  | -0.42424 |

TS-iso-ma, isomerization of IM1 to IM2

[00\\_sma-f.mol2](#)

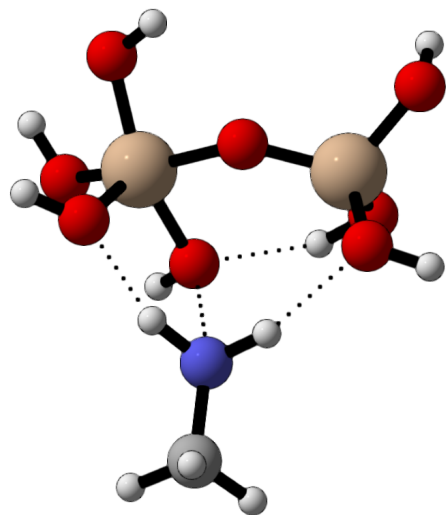

E = -1282.006964  
H = -1281.798309  
G = -1281.861325  
G(quasi-RRHO) = -1281.858999

|    |          |          |          |
|----|----------|----------|----------|
| Si | -1.40936 | -0.67074 | -0.04170 |
| O  | -2.79539 | -0.98600 | 0.92918  |
| H  | -3.30201 | -1.71967 | 0.57828  |
| O  | -1.87658 | 0.60193  | -1.05508 |
| O  | -1.75956 | -2.10912 | -0.90150 |
| H  | -1.03094 | -2.34852 | -1.47588 |
| H  | -2.65303 | 0.41906  | -1.58525 |
| O  | -0.79619 | 0.22865  | 1.33466  |
| H  | -1.48821 | 0.29329  | 1.99771  |
| Si | 1.73654  | -0.62455 | 0.00083  |
| O  | 1.77729  | -0.67679 | 1.63714  |
| H  | 0.91537  | -0.37129 | 1.96841  |
| O  | 2.25002  | 0.83641  | -0.58549 |
| O  | 2.82343  | -1.70830 | -0.56720 |
| H  | 2.81907  | -2.57959 | -0.16610 |
| O  | 0.25253  | -0.81825 | -0.55849 |
| H  | 3.15557  | 1.09109  | -0.39444 |
| H  | -0.28662 | 1.97663  | 0.67782  |
| H  | -0.75978 | 2.11372  | -0.85249 |
| H  | 0.85966  | 2.16268  | -0.47969 |
| N  | -0.06969 | 2.49192  | -0.18815 |
| C  | -0.14145 | 3.96089  | -0.03914 |
| H  | 0.58764  | 4.27939  | 0.69726  |
| H  | 0.07302  | 4.42528  | -0.99496 |
| H  | -1.13821 | 4.23496  | 0.28758  |

*01\_sma-f.mol2*

E = -1282.006964

H = -1281.798308

G = -1281.861320

G(quasi-RRHO) = -1281.858996

|    |          |          |          |
|----|----------|----------|----------|
| Si | -1.40938 | -0.67066 | -0.04171 |
| O  | -2.79541 | -0.98581 | 0.92918  |
| H  | -3.30208 | -1.71947 | 0.57832  |
| O  | -1.87651 | 0.60201  | -1.05511 |
| O  | -1.75965 | -2.10906 | -0.90144 |
| H  | -1.03105 | -2.34852 | -1.47582 |
| H  | -2.65292 | 0.41915  | -1.58535 |
| O  | -0.79614 | 0.22871  | 1.33465  |
| H  | -1.48814 | 0.29335  | 1.99772  |
| Si | 1.73647  | -0.62461 | 0.00083  |
| O  | 1.77718  | -0.67693 | 1.63714  |



|   |          |          |          |
|---|----------|----------|----------|
| H | 0.91526  | -0.37139 | 1.96840  |
| O | 2.25005  | 0.83632  | -0.58544 |
| O | 2.82331  | -1.70841 | -0.56720 |
| H | 2.81883  | -2.57973 | -0.16616 |
| O | 0.25248  | -0.81822 | -0.55854 |
| H | 3.15565  | 1.09083  | -0.39436 |
| H | -0.28664 | 1.97648  | 0.67770  |
| H | -0.75961 | 2.11382  | -0.85266 |
| H | 0.85984  | 2.16259  | -0.47961 |
| N | -0.06954 | 2.49189  | -0.18819 |
| C | -0.14122 | 3.96085  | -0.03910 |
| H | 0.58798  | 4.27928  | 0.69722  |
| H | 0.07313  | 4.42527  | -0.99493 |
| H | -1.13793 | 4.23494  | 0.28778  |

*02\_sma-f.mol2*

E = -1282.006179  
H = -1281.797841  
G = -1281.860440  
G(quasi-RRHO) = -1281.858001

|    |          |          |          |
|----|----------|----------|----------|
| Si | 1.57634  | 0.00222  | 0.06548  |
| O  | 3.10335  | 0.75594  | 0.26322  |
| H  | 3.63713  | 0.27689  | 0.89901  |
| O  | 1.11679  | 1.44892  | -0.80636 |
| O  | 1.97018  | -1.01059 | 1.39354  |
| H  | 1.19993  | -1.41739 | 1.78943  |
| H  | 1.88057  | 2.01468  | -0.93924 |
| O  | 1.70903  | -1.09877 | -1.21932 |
| H  | 1.78032  | -0.65326 | -2.06642 |
| Si | -1.31205 | -1.06846 | 0.02464  |
| O  | -0.80488 | -2.19853 | -1.04032 |
| H  | 0.12488  | -2.03329 | -1.29125 |
| O  | -2.50511 | -0.16325 | -0.69105 |
| O  | -1.96906 | -1.74557 | 1.36244  |
| H  | -2.85606 | -2.10185 | 1.28695  |
| O  | -0.11521 | -0.11943 | 0.49930  |
| H  | -2.72393 | -0.40129 | -1.59504 |
| H  | -1.57014 | 3.14932  | -1.22958 |
| H  | -0.35009 | 2.13366  | -0.65024 |
| N  | -1.33959 | 2.47766  | -0.50323 |
| C  | -1.49418 | 3.06696  | 0.84636  |
| H  | -1.22794 | 2.31155  | 1.57693  |
| H  | -0.82934 | 3.91843  | 0.93899  |

|   |          |         |          |
|---|----------|---------|----------|
| H | -2.52133 | 3.38196 | 0.99241  |
| H | -1.94252 | 1.65285 | -0.62064 |

*03\_sma-f.mol2*

E = -1282.004768  
H = -1281.796277  
G = -1281.860232  
G(quasi-RRHO) = -1281.857126

|    |          |          |          |
|----|----------|----------|----------|
| Si | -0.44348 | 0.92837  | -0.07941 |
| O  | -2.12192 | 1.31501  | -0.18283 |
| H  | -2.22877 | 2.17389  | -0.59516 |
| O  | 0.10834  | 1.42504  | 1.44610  |
| O  | -0.16304 | 2.33766  | -1.03361 |
| H  | 0.72421  | 2.33169  | -1.39472 |
| H  | 0.26995  | 2.37096  | 1.46757  |
| O  | -0.98103 | -0.66857 | 0.34635  |
| H  | -0.30556 | -1.35104 | 0.28772  |
| Si | 2.18153  | -0.58344 | -0.08990 |
| O  | 1.59094  | -2.11441 | 0.10962  |
| H  | 2.06839  | -2.70728 | 0.69354  |
| O  | 2.59086  | 0.09723  | 1.33864  |
| O  | 3.56861  | -0.61706 | -0.95455 |
| H  | 3.61799  | -1.24488 | -1.67765 |
| O  | 0.99336  | 0.23004  | -0.79996 |
| H  | 1.85093  | 0.63581  | 1.67150  |
| H  | -3.59014 | 0.16041  | 0.23268  |
| H  | -4.06371 | -0.94429 | 1.39062  |
| H  | -2.60628 | -1.04781 | 0.53673  |
| C  | -4.31682 | -1.64481 | -0.55487 |
| H  | -4.26508 | -2.69229 | -0.27999 |
| H  | -5.35240 | -1.33338 | -0.63236 |
| H  | -3.81345 | -1.48899 | -1.50261 |
| N  | -3.63239 | -0.83751 | 0.47766  |

*04\_sma-f.mol2*

E = -1282.006041  
H = -1281.797092  
G = -1281.859452  
G(quasi-RRHO) = -1281.856960

|    |         |         |          |
|----|---------|---------|----------|
| Si | 0.42380 | 1.07066 | -0.17459 |
| O  | 1.38779 | 2.48720 | -0.16131 |

|    |          |          |          |
|----|----------|----------|----------|
| H  | 2.18340  | 2.38936  | -0.68587 |
| O  | 0.91247  | 0.19282  | 1.21106  |
| O  | 1.52407  | 0.42206  | -1.36955 |
| H  | 1.08963  | -0.28530 | -1.85179 |
| H  | 0.88565  | 0.72769  | 2.00813  |
| O  | -0.87121 | 2.04432  | 0.42788  |
| H  | -0.56386 | 2.91815  | 0.67521  |
| Si | -2.00615 | -0.69072 | -0.04441 |
| O  | -3.09612 | 0.45956  | 0.37974  |
| H  | -2.60882 | 1.29400  | 0.50031  |
| O  | -1.42393 | -1.52619 | 1.24326  |
| O  | -2.79440 | -1.81369 | -0.93632 |
| H  | -3.47591 | -1.48755 | -1.52667 |
| O  | -0.76241 | -0.01070 | -0.82128 |
| H  | -0.55338 | -1.18470 | 1.49774  |
| H  | 2.88584  | -0.33316 | -0.56079 |
| H  | 2.70098  | -0.61515 | 1.01003  |
| H  | 4.22894  | -0.27659 | 0.44922  |
| C  | 3.62296  | -2.22344 | 0.02157  |
| H  | 4.29169  | -2.33567 | -0.82406 |
| H  | 4.07118  | -2.65270 | 0.91020  |
| H  | 2.67748  | -2.71068 | -0.18830 |
| N  | 3.37029  | -0.78133 | 0.24792  |

*05\_sma-f.mol2*

E = -1282.004196

H = -1281.795818

G = -1281.858777

G(quasi-RRHO) = -1281.856360

|    |          |          |          |
|----|----------|----------|----------|
| Si | 0.50531  | 0.74370  | -0.16009 |
| O  | 1.55069  | 2.07890  | -0.31840 |
| H  | 2.24783  | 1.90942  | -0.95365 |
| O  | 1.06239  | -0.18097 | 1.14698  |
| O  | 1.45391  | -0.03143 | -1.43659 |
| H  | 0.91558  | -0.69661 | -1.87084 |
| H  | 0.34086  | -0.48824 | 1.70369  |
| O  | -0.60802 | 1.80278  | 0.66416  |
| H  | -0.16183 | 2.58963  | 0.98086  |
| Si | -2.25651 | -0.45091 | -0.05278 |
| O  | -3.12652 | 0.89862  | 0.26666  |
| H  | -2.48585 | 1.59335  | 0.50284  |
| O  | -1.85878 | -1.28279 | 1.31113  |
| O  | -3.19650 | -1.44640 | -0.95070 |

|   |          |          |          |
|---|----------|----------|----------|
| H | -3.68961 | -1.04691 | -1.66976 |
| O | -0.85815 | -0.11041 | -0.77808 |
| H | -2.56237 | -1.45810 | 1.93899  |
| H | 2.77623  | -0.92343 | -0.72658 |
| H | 2.65525  | -1.15802 | 0.85236  |
| N | 3.29733  | -1.35517 | 0.07063  |
| C | 4.63799  | -0.75952 | 0.26848  |
| H | 4.52375  | 0.30896  | 0.41235  |
| H | 5.10256  | -1.20166 | 1.14250  |
| H | 5.24392  | -0.95019 | -0.61007 |
| H | 3.34895  | -2.36021 | -0.06894 |

*06\_sma-f.mol2*

E = -1282.004226

H = -1281.795853

G = -1281.858655

G(quasi-RRHO) = -1281.856428

|    |          |          |          |
|----|----------|----------|----------|
| Si | -0.45365 | 0.98421  | 0.12952  |
| O  | -1.27599 | 2.46646  | 0.29196  |
| H  | -2.01566 | 2.39674  | 0.89713  |
| O  | -1.10614 | 0.18800  | -1.21710 |
| O  | -1.55788 | 0.34627  | 1.35666  |
| H  | -1.15029 | -0.40830 | 1.78716  |
| H  | -0.42524 | -0.22878 | -1.75346 |
| O  | 0.84282  | 1.86810  | -0.63087 |
| H  | 0.53953  | 2.72310  | -0.93999 |
| Si | 2.08498  | -0.63489 | 0.08014  |
| O  | 3.16896  | 0.56505  | -0.17528 |
| H  | 2.65521  | 1.35770  | -0.41346 |
| O  | 1.61111  | -1.36450 | -1.31743 |
| O  | 2.82100  | -1.78540 | 0.98309  |
| H  | 3.33829  | -1.48407 | 1.73242  |
| O  | 0.73259  | -0.09081 | 0.76746  |
| H  | 2.30023  | -1.63344 | -1.92803 |
| H  | -2.98691 | -0.27238 | 0.58150  |
| H  | -2.86310 | -0.49632 | -0.99989 |
| H  | -4.35699 | -0.08218 | -0.38312 |
| C  | -3.86967 | -2.08089 | -0.05636 |
| H  | -4.51980 | -2.18934 | 0.80431  |
| H  | -4.36979 | -2.44273 | -0.94736 |
| H  | -2.95206 | -2.63611 | 0.10316  |
| N  | -3.52938 | -0.65064 | -0.22935 |

07\_sma-f.mol2

E = -1282.002675

H = -1281.794431

G = -1281.858419

G(quasi-RRHO) = -1281.855505

|    |          |          |          |
|----|----------|----------|----------|
| Si | -0.46813 | -0.51725 | 0.06391  |
| O  | -1.96077 | -1.25164 | -0.39227 |
| H  | -1.89031 | -1.93497 | -1.05730 |
| O  | 0.02414  | -1.25044 | 1.50691  |
| O  | -1.47143 | 0.76481  | 0.68238  |
| H  | -0.94317 | 1.54170  | 0.86986  |
| H  | 0.00671  | -2.20885 | 1.48637  |
| O  | 0.39232  | -1.46941 | -1.12916 |
| H  | 0.09126  | -2.37035 | -1.25404 |
| Si | 2.35206  | 0.47439  | -0.07487 |
| O  | 2.89065  | -0.35489 | -1.38483 |
| H  | 2.18068  | -0.96640 | -1.64512 |
| O  | 2.70175  | -0.26835 | 1.34518  |
| O  | 3.18222  | 1.88456  | -0.02409 |
| H  | 3.38654  | 2.28900  | -0.86908 |
| O  | 0.75028  | 0.68455  | -0.16433 |
| H  | 1.91243  | -0.71896 | 1.68838  |
| H  | -3.11424 | 0.73745  | 0.59613  |
| H  | -4.63401 | 0.24791  | 1.16487  |
| H  | -3.82885 | -0.53365 | -0.06115 |
| N  | -4.06908 | 0.38097  | 0.33145  |
| C  | -4.74037 | 1.25597  | -0.65469 |
| H  | -4.91763 | 2.22562  | -0.20343 |
| H  | -4.09056 | 1.36523  | -1.51575 |
| H  | -5.68135 | 0.81020  | -0.95643 |

IM2-ma, co-linear OH groups on Si

00\_sma-g.mol2

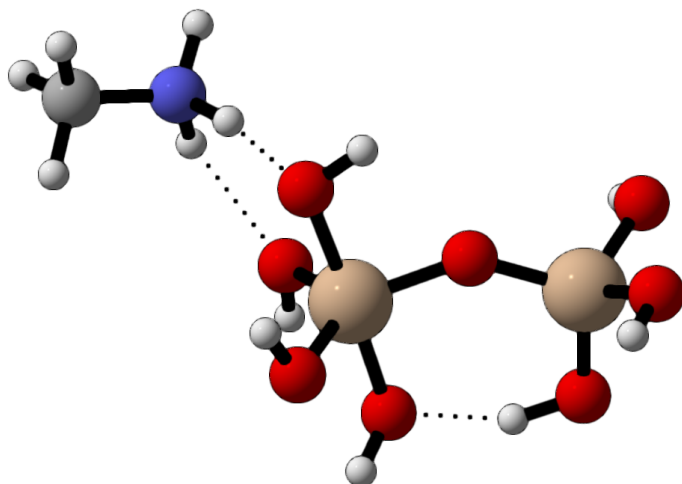

E = -1282.012984  
 H = -1281.804195  
 G = -1281.871353  
 G(quasi-RRHO) = -1281.867521

|    |          |          |          |
|----|----------|----------|----------|
| Si | 0.50935  | 0.67703  | 0.08589  |
| O  | 1.51189  | 0.34782  | -1.23373 |
| H  | 1.24833  | 0.89565  | -1.97629 |
| O  | 0.83144  | 1.95029  | 1.13761  |
| O  | -0.79710 | -0.35055 | 0.34519  |
| H  | 1.39185  | 1.65515  | 1.85784  |
| O  | 1.53389  | -0.41207 | 1.07610  |
| H  | 0.99129  | -1.07828 | 1.50102  |
| O  | -0.44596 | 1.80536  | -0.91023 |
| H  | -0.35561 | 2.70002  | -0.57801 |
| Si | -2.37358 | -0.49630 | 0.00899  |
| O  | -2.72786 | -1.94838 | -0.66243 |
| H  | -2.48926 | -2.06106 | -1.58411 |
| O  | -2.82871 | 0.72587  | -0.96733 |
| H  | -2.04456 | 1.31699  | -1.08789 |
| O  | -3.25942 | -0.57600 | 1.38581  |
| H  | -3.12965 | 0.12952  | 2.02189  |
| C  | 4.89762  | -0.67526 | 0.07628  |
| N  | 3.60093  | -1.24213 | -0.35424 |
| H  | 3.24882  | -0.79708 | -1.20397 |
| H  | 3.66210  | -2.24371 | -0.51057 |
| H  | 5.64776  | -0.85505 | -0.68562 |
| H  | 4.77409  | 0.39136  | 0.22747  |
| H  | 5.19601  | -1.14430 | 1.00707  |
| H  | 2.82042  | -1.03158 | 0.33681  |

*01\_sma-g.mol2*

E = -1282.013002

H = -1281.804095

G = -1281.870628

G(quasi-RRHO) = -1281.867088

|    |          |          |          |
|----|----------|----------|----------|
| Si | 0.46804  | -0.96381 | 0.07185  |
| O  | -0.59926 | -1.78742 | -1.09513 |
| H  | -0.68264 | -2.71565 | -0.87049 |
| O  | 1.60081  | -0.18655 | 1.22503  |
| O  | 0.48634  | -2.37730 | 0.98411  |
| H  | 1.04775  | -2.27129 | 1.75445  |
| H  | 1.13963  | 0.47702  | 1.74069  |
| O  | 1.60016  | -0.68426 | -1.15057 |
| H  | 1.29608  | -1.09360 | -1.96351 |
| Si | -2.16418 | 0.69831  | 0.01627  |
| O  | -3.13191 | 0.77414  | 1.33688  |
| H  | -3.44276 | -0.06202 | 1.68787  |
| O  | -2.76414 | -0.31730 | -1.10734 |
| O  | -2.19943 | 2.26260  | -0.47102 |
| H  | -1.61178 | 2.50142  | -1.18986 |
| O  | -0.65533 | 0.24732  | 0.38908  |
| H  | -2.08102 | -1.01404 | -1.27165 |
| H  | 2.99164  | 0.34107  | 0.60788  |
| H  | 4.64318  | 0.13951  | 0.24791  |
| H  | 3.47169  | 0.17586  | -0.92505 |
| N  | 3.78682  | 0.59741  | -0.04920 |
| C  | 3.96193  | 2.06134  | -0.16842 |
| H  | 3.02046  | 2.49608  | -0.48563 |
| H  | 4.24305  | 2.46314  | 0.79861  |
| H  | 4.73328  | 2.27985  | -0.89829 |

*02\_sma-g.mol2*

E = -1282.011706

H = -1281.802889

G = -1281.869653

G(quasi-RRHO) = -1281.866140

|    |         |         |          |
|----|---------|---------|----------|
| Si | 0.46596 | 0.56896 | -0.07785 |
| O  | 0.68641 | 1.94229 | -1.02279 |
| H  | 1.30639 | 1.76486 | -1.73289 |
| O  | 1.49292 | 0.29236 | 1.23574  |

|    |          |          |          |
|----|----------|----------|----------|
| O  | 1.59517  | -0.35869 | -1.10745 |
| H  | 1.11841  | -1.03105 | -1.59704 |
| H  | 1.14939  | 0.73580  | 2.01404  |
| O  | -0.67897 | 1.47389  | 0.93661  |
| H  | -0.56236 | 2.42170  | 0.85611  |
| Si | -2.31552 | -0.46985 | -0.02247 |
| O  | -3.05658 | 0.75553  | -0.83075 |
| H  | -2.61260 | 1.60204  | -0.73325 |
| O  | -2.56575 | -0.42174 | 1.59594  |
| O  | -3.09331 | -1.84143 | -0.46175 |
| H  | -3.14710 | -2.03162 | -1.39956 |
| O  | -0.74131 | -0.56350 | -0.41257 |
| H  | -2.03534 | 0.29333  | 1.97152  |
| N  | 3.69573  | -1.11055 | 0.32334  |
| H  | 3.79860  | -2.11104 | 0.46430  |
| H  | 3.30660  | -0.69791 | 1.17374  |
| H  | 2.91843  | -0.92590 | -0.37653 |
| C  | 4.97365  | -0.48062 | -0.07412 |
| H  | 5.71729  | -0.64136 | 0.69830  |
| H  | 5.30819  | -0.92073 | -1.00680 |
| H  | 4.80717  | 0.58218  | -0.21006 |

*03\_sma-g.mol2*

E = -1282.011213

H = -1281.802047

G = -1281.869147

G(quasi-RRHO) = -1281.865458

|    |          |          |          |
|----|----------|----------|----------|
| Si | 0.44094  | 1.14211  | -0.00882 |
| O  | 0.91858  | -0.37749 | -0.89709 |
| H  | 1.10880  | -0.14398 | -1.80905 |
| O  | 0.09371  | 2.65521  | 0.80655  |
| O  | 1.55431  | 0.69777  | 1.18468  |
| H  | 1.53140  | 1.35575  | 1.88336  |
| H  | -0.79185 | 2.65841  | 1.16995  |
| O  | 0.89297  | 1.96410  | -1.40718 |
| H  | 0.73076  | 2.90310  | -1.29455 |
| Si | -2.10795 | -0.66880 | 0.00746  |
| O  | -2.78451 | -1.16632 | 1.41390  |
| H  | -2.21794 | -1.65825 | 2.01053  |
| O  | -1.26320 | -1.88159 | -0.68439 |
| O  | -3.44665 | -0.26328 | -0.84590 |
| H  | -3.30583 | 0.19609  | -1.67547 |
| O  | -1.14090 | 0.60984  | 0.20348  |



|   |          |          |          |
|---|----------|----------|----------|
| H | -0.36231 | -1.54433 | -0.88792 |
| N | 2.95454  | -1.53432 | 0.42522  |
| H | 2.18472  | -1.23808 | -0.22947 |
| H | 2.83935  | -0.85667 | 1.18367  |
| H | 2.76284  | -2.46620 | 0.78099  |
| C | 4.29204  | -1.45182 | -0.20265 |
| H | 5.05225  | -1.69968 | 0.52935  |
| H | 4.33596  | -2.14734 | -1.03304 |
| H | 4.44165  | -0.43996 | -0.56246 |

*04\_sma-g.mol2*

E = -1282.009636

H = -1281.800875

G = -1281.868546

G(quasi-RRHO) = -1281.864545

|    |          |          |          |
|----|----------|----------|----------|
| Si | 0.51785  | 0.61851  | -0.08478 |
| O  | -0.45547 | 1.74067  | 0.92876  |
| H  | 0.00075  | 2.52968  | 1.22520  |
| O  | 1.56678  | -0.44681 | -1.02901 |
| O  | 0.78779  | 1.82308  | -1.23418 |
| H  | 0.24265  | 2.59578  | -1.07758 |
| H  | 1.55967  | -0.21193 | -1.95772 |
| O  | 1.52029  | 0.27246  | 1.23580  |
| H  | 1.16219  | 0.65099  | 2.04036  |
| Si | -2.39819 | -0.48541 | -0.01665 |
| O  | -3.24662 | -0.61268 | -1.41411 |
| H  | -3.08123 | 0.05816  | -2.07868 |
| O  | -2.88901 | 0.78006  | 0.88872  |
| O  | -2.79161 | -1.90493 | 0.70313  |
| H  | -2.58200 | -1.98178 | 1.63542  |
| O  | -0.81523 | -0.37004 | -0.30866 |
| H  | -2.10986 | 1.35621  | 1.06178  |
| N  | 3.70002  | -1.19133 | 0.32162  |
| H  | 3.78244  | -2.19582 | 0.44628  |
| H  | 2.91429  | -0.97684 | -0.36329 |
| H  | 3.33925  | -0.78281 | 1.18544  |
| C  | 4.98491  | -0.58508 | -0.08951 |
| H  | 4.83932  | 0.48252  | -0.21148 |
| H  | 5.73754  | -0.77026 | 0.66862  |
| H  | 5.29474  | -1.02184 | -1.03226 |

05\_sma-g.mol2

E = -1282.012939  
H = -1281.803562  
G = -1281.867359  
G(quasi-RRHO) = -1281.865209

|    |          |          |          |
|----|----------|----------|----------|
| Si | -1.53873 | -0.18584 | -0.00543 |
| O  | -2.57983 | -0.63802 | 1.23742  |
| H  | -3.28086 | -1.19187 | 0.88701  |
| O  | -1.76807 | 1.29283  | -0.79590 |
| O  | -2.51666 | -1.06212 | -1.16252 |
| H  | -1.97510 | -1.53975 | -1.79101 |
| H  | -2.31285 | 1.14918  | -1.57323 |
| O  | -0.55674 | 0.66777  | 1.24990  |
| H  | -1.12435 | 0.96188  | 1.96571  |
| Si | 1.38299  | -1.17641 | -0.03232 |
| O  | 1.53552  | -1.04573 | 1.58912  |
| H  | 0.85017  | -0.42503 | 1.89823  |
| O  | 2.20267  | 0.00626  | -0.84335 |
| O  | 2.06656  | -2.58243 | -0.50474 |
| H  | 1.87784  | -3.36147 | 0.02216  |
| O  | -0.15342 | -1.03140 | -0.48716 |
| H  | 3.16109  | -0.01697 | -0.78973 |
| H  | -0.03029 | 2.56495  | -0.97924 |
| N  | 0.73631  | 2.47829  | -0.31101 |
| H  | 1.43151  | 1.83858  | -0.71009 |
| H  | 0.29907  | 1.94929  | 0.48006  |
| C  | 1.31886  | 3.77792  | 0.08251  |
| H  | 0.54328  | 4.39392  | 0.52351  |
| H  | 2.10614  | 3.60533  | 0.80782  |
| H  | 1.72697  | 4.27069  | -0.79280 |

06\_sma-g.mol2

E = -1282.012939  
H = -1281.803562  
G = -1281.867341  
G(quasi-RRHO) = -1281.865195

|    |          |          |          |
|----|----------|----------|----------|
| Si | -1.53891 | -0.18455 | -0.00548 |
| O  | -2.58024 | -0.63489 | 1.23783  |
| H  | -3.28227 | -1.18792 | 0.88814  |
| O  | -1.76663 | 1.29442  | -0.79574 |
| O  | -2.51821 | -1.06004 | -1.16177 |
| H  | -1.97779 | -1.53659 | -1.79208 |

|    |          |          |          |
|----|----------|----------|----------|
| H  | -2.31209 | 1.15168  | -1.57276 |
| O  | -0.55531 | 0.66784  | 1.24991  |
| H  | -1.12271 | 0.96330  | 1.96538  |
| Si | 1.38177  | -1.17751 | -0.03246 |
| O  | 1.53497  | -1.04729 | 1.58899  |
| H  | 0.85025  | -0.42604 | 1.89832  |
| O  | 2.20226  | 0.00461  | -0.84358 |
| O  | 2.06399  | -2.58431 | -0.50490 |
| H  | 1.87502  | -3.36280 | 0.02274  |
| O  | -0.15449 | -1.03138 | -0.48750 |
| H  | 3.16061  | -0.01774 | -0.78776 |
| N  | 0.73849  | 2.47748  | -0.31217 |
| H  | 0.30023  | 1.94832  | 0.47824  |
| H  | -0.02744 | 2.56618  | -0.98080 |
| H  | 1.43318  | 1.83727  | -0.71136 |
| C  | 1.32245  | 3.77601  | 0.08332  |
| H  | 2.10838  | 3.60156  | 0.80967  |
| H  | 1.73259  | 4.26886  | -0.79100 |
| H  | 0.54705  | 4.39271  | 0.52368  |

*08\_sma-g.mol2*

E = -1282.012452

H = -1281.803170

G = -1281.866659

G(quasi-RRHO) = -1281.864229

|    |          |          |          |
|----|----------|----------|----------|
| Si | 1.52158  | 0.35879  | 0.04214  |
| O  | 2.60581  | 0.65821  | 1.29271  |
| H  | 2.44358  | 1.50571  | 1.71031  |
| O  | 1.83594  | 0.55307  | -1.59751 |
| O  | 0.86808  | 2.04535  | 0.16247  |
| H  | 1.48950  | 2.73678  | -0.07495 |
| H  | 1.48209  | 1.37603  | -1.93666 |
| O  | 2.17757  | -1.27229 | -0.10233 |
| H  | 2.56815  | -1.55088 | 0.72765  |
| Si | -0.96490 | -1.39138 | 0.03192  |
| O  | -1.89007 | -1.97365 | 1.25063  |
| H  | -1.50158 | -2.65704 | 1.80025  |
| O  | -0.06388 | -2.57551 | -0.62527 |
| O  | -2.04465 | -0.72267 | -1.02256 |
| H  | -2.85260 | -1.20478 | -1.21065 |
| O  | -0.02933 | -0.15672 | 0.47318  |
| H  | 0.88579  | -2.30926 | -0.54343 |
| N  | -1.71760 | 2.13955  | -0.56181 |

|   |          |         |          |
|---|----------|---------|----------|
| H | -1.93476 | 1.17839 | -0.85608 |
| H | -1.88206 | 2.75872 | -1.35045 |
| H | -0.68708 | 2.16445 | -0.31509 |
| C | -2.54209 | 2.52898 | 0.60533  |
| H | -3.59316 | 2.47563 | 0.34437  |
| H | -2.32682 | 1.84511 | 1.41868  |
| H | -2.28451 | 3.54032 | 0.89946  |

*07\_sma-g.mol2*

E = -1282.012706  
H = -1281.803321  
G = -1281.867048  
G(quasi-RRHO) = -1281.864891

|    |          |          |          |
|----|----------|----------|----------|
| Si | -1.53770 | -0.18539 | -0.00366 |
| O  | -0.55025 | 0.67209  | 1.24520  |
| H  | -1.11532 | 0.96662  | 1.96289  |
| O  | -1.76448 | 1.28907  | -0.80247 |
| O  | -2.57893 | -0.62542 | 1.24338  |
| H  | -3.28225 | -1.17934 | 0.89771  |
| H  | -2.31001 | 1.14168  | -1.57858 |
| O  | -2.51950 | -1.06528 | -1.15480 |
| H  | -1.98045 | -1.55569 | -1.77552 |
| Si | 1.37817  | -1.18331 | -0.01758 |
| O  | 2.02363  | -2.64256 | -0.36595 |
| H  | 2.18309  | -2.84729 | -1.28910 |
| O  | 1.54912  | -1.04282 | 1.59822  |
| O  | 2.18960  | 0.00394  | -0.84014 |
| H  | 3.14729  | -0.00183 | -0.76785 |
| O  | -0.15591 | -1.03953 | -0.48020 |
| H  | 0.87180  | -0.41466 | 1.90768  |
| N  | 0.73506  | 2.48014  | -0.32283 |
| H  | 0.29766  | 1.95358  | 0.46987  |
| H  | -0.03193 | 2.56855  | -0.99018 |
| H  | 1.42653  | 1.83569  | -0.72105 |
| C  | 1.32349  | 3.77804  | 0.06739  |
| H  | 2.11030  | 3.60372  | 0.79282  |
| H  | 1.73344  | 4.26711  | -0.80916 |
| H  | 0.55076  | 4.39842  | 0.50732  |

*09\_sma-g.mol2*

E = -1282.011366  
H = -1281.802084

G = -1281.866329  
G(quasi-RRHO) = -1281.864048

|    |          |          |          |
|----|----------|----------|----------|
| Si | -1.21029 | -0.92582 | -0.00296 |
| O  | -1.95779 | -1.86318 | 1.18037  |
| H  | -2.30905 | -2.66303 | 0.78331  |
| O  | -2.04763 | 0.32392  | -0.75996 |
| O  | -1.64469 | -2.10047 | -1.22818 |
| H  | -0.91700 | -2.26924 | -1.82671 |
| H  | -2.42376 | 0.00161  | -1.58204 |
| O  | -0.78782 | 0.23408  | 1.32389  |
| H  | -1.41457 | 0.14109  | 2.04463  |
| Si | 1.80215  | -0.29801 | -0.04216 |
| O  | 1.89307  | -0.00140 | 1.55823  |
| H  | 0.97968  | 0.09957  | 1.88780  |
| O  | 1.91162  | 1.17323  | -0.78872 |
| O  | 3.09785  | -1.14546 | -0.55995 |
| H  | 3.10373  | -2.08985 | -0.39199 |
| O  | 0.42815  | -1.05324 | -0.41480 |
| H  | 2.01460  | 1.16577  | -1.74364 |
| N  | -0.29237 | 2.72558  | 0.33302  |
| H  | 0.52722  | 2.43662  | -0.21547 |
| H  | -0.67138 | 1.83228  | 0.73961  |
| H  | 0.04225  | 3.30350  | 1.09946  |
| C  | -1.28857 | 3.45079  | -0.48994 |
| H  | -0.82405 | 4.32887  | -0.92453 |
| H  | -1.64027 | 2.77721  | -1.26100 |
| H  | -2.11751 | 3.74562  | 0.14374  |

*10\_sma-g.mol2*

E = -1282.010069  
H = -1281.800622  
G = -1281.864578  
G(quasi-RRHO) = -1281.862362

|    |          |          |          |
|----|----------|----------|----------|
| Si | -1.56764 | -0.01074 | -0.03014 |
| O  | -0.51354 | 0.72218  | 1.29498  |
| H  | -1.01361 | 1.31010  | 1.86666  |
| O  | -2.61033 | -0.58313 | -1.28545 |
| O  | -2.51294 | -0.76517 | 1.14118  |
| H  | -2.13102 | -0.70921 | 2.01840  |
| H  | -2.98622 | -1.44080 | -1.08563 |
| O  | -1.74454 | 1.56572  | -0.61579 |
| H  | -2.36002 | 1.56425  | -1.35310 |

|    |          |          |          |
|----|----------|----------|----------|
| Si | 1.24690  | -1.28070 | -0.07447 |
| O  | 1.70119  | -2.77060 | -0.56601 |
| H  | 1.36708  | -3.51856 | -0.06692 |
| O  | 1.35478  | -1.21831 | 1.55469  |
| O  | 2.28429  | -0.23460 | -0.82074 |
| H  | 3.22432  | -0.38744 | -0.70022 |
| O  | -0.21390 | -0.84670 | -0.58373 |
| H  | 0.75140  | -0.52337 | 1.87825  |
| H  | 0.49957  | 1.82363  | 0.43784  |
| H  | 0.27638  | 2.54896  | -1.00109 |
| H  | 1.63245  | 1.62444  | -0.74639 |
| N  | 1.00931  | 2.32491  | -0.32943 |
| C  | 1.74204  | 3.52231  | 0.13626  |
| H  | 2.22884  | 3.99855  | -0.70726 |
| H  | 1.03967  | 4.20990  | 0.59379  |
| H  | 2.48392  | 3.21632  | 0.86555  |

*11\_sma-g.mol2*

E = -1282.007505  
H = -1281.798313  
G = -1281.863487  
G(quasi-RRHO) = -1281.860559

|    |          |          |          |
|----|----------|----------|----------|
| Si | -0.20297 | -1.34475 | -0.04251 |
| O  | 1.32758  | -1.60979 | -0.85962 |
| H  | 1.74715  | -2.43251 | -0.60517 |
| O  | 0.46393  | -1.99572 | 1.37311  |
| O  | -1.00232 | -2.25287 | -1.20435 |
| H  | -1.95528 | -2.23572 | -1.10503 |
| H  | -0.15598 | -1.96228 | 2.10459  |
| O  | -1.75373 | -0.98315 | 0.81268  |
| H  | -2.30422 | -1.73651 | 1.03364  |
| Si | 1.44075  | 1.05106  | -0.03232 |
| O  | 1.26337  | 2.67319  | 0.09124  |
| H  | 1.04551  | 3.01712  | 0.95924  |
| O  | 2.38637  | 0.87600  | -1.35466 |
| O  | 2.13127  | 0.50872  | 1.35526  |
| H  | 1.83384  | -0.37770 | 1.60604  |
| O  | -0.00728 | 0.32746  | -0.22079 |
| H  | 2.34342  | -0.05728 | -1.61448 |
| N  | -2.54755 | 1.50496  | 0.38986  |
| H  | -1.66668 | 1.82782  | -0.00848 |
| H  | -2.72856 | 2.03856  | 1.23527  |
| H  | -2.35090 | 0.49246  | 0.64324  |

|   |          |         |          |
|---|----------|---------|----------|
| C | -3.66431 | 1.62069 | -0.57558 |
| H | -3.80158 | 2.65930 | -0.85402 |
| H | -3.42315 | 1.03081 | -1.45279 |
| H | -4.56711 | 1.23803 | -0.11317 |

TS3-cma, water cleavage from IM2, CH<sub>3</sub>NH<sub>3</sub><sup>+</sup> acting as catalyst

*00\_cma-k.mol2*

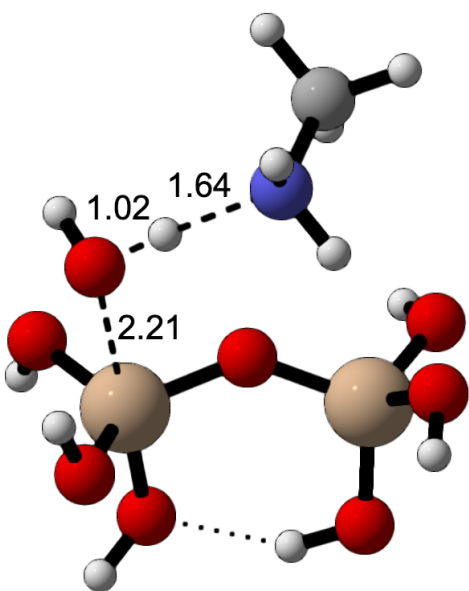

|               |                |
|---------------|----------------|
| E             | = -1282.002620 |
| H             | = -1281.799392 |
| G             | = -1281.866917 |
| G(quasi-RRHO) | = -1281.862949 |

|    |          |          |          |
|----|----------|----------|----------|
| Si | 0.32391  | 0.90176  | -0.04769 |
| O  | 1.06265  | 1.05476  | -1.52543 |
| H  | 1.73860  | 0.39279  | -1.67602 |
| O  | 0.85925  | 1.72076  | 1.29746  |
| O  | 1.70735  | -0.45398 | 0.40729  |
| H  | 1.34117  | -1.33979 | 0.45856  |
| H  | 1.51102  | 1.23620  | 1.80567  |
| O  | -0.86012 | 2.10376  | -0.39577 |
| H  | -0.83476 | 2.82599  | 0.23370  |
| Si | -2.31064 | -0.66410 | 0.03102  |
| O  | -2.66300 | -1.99381 | -0.85715 |
| H  | -2.68599 | -1.88318 | -1.80966 |
| O  | -3.07095 | 0.62614  | -0.61279 |
| O  | -2.77962 | -1.01840 | 1.55798  |

|   |          |          |          |
|---|----------|----------|----------|
| H | -3.67336 | -1.34381 | 1.68009  |
| O | -0.71787 | -0.38521 | 0.11619  |
| H | -2.45387 | 1.38916  | -0.61537 |
| N | 4.20686  | -0.43146 | 0.41853  |
| H | 2.85729  | -0.44222 | 0.41463  |
| H | 4.53437  | -0.53580 | 1.37237  |
| C | 4.75801  | -1.49949 | -0.43452 |
| H | 4.40341  | -2.46007 | -0.07221 |
| H | 4.40239  | -1.35889 | -1.45113 |
| H | 5.84524  | -1.49825 | -0.43406 |
| H | 4.53110  | 0.47574  | 0.10187  |

*01\_cma-k.mol2*

E = -1282.006572  
H = -1281.800802  
G = -1281.866658  
G(quasi-RRHO) = -1281.863443

|    |          |          |          |
|----|----------|----------|----------|
| Si | -1.56503 | -0.33792 | 0.05123  |
| O  | -2.25516 | -1.10286 | 1.34113  |
| H  | -2.87121 | -0.53941 | 1.81482  |
| O  | -2.04558 | -0.73005 | -1.47354 |
| O  | -0.02230 | 0.15801  | 0.31237  |
| H  | -1.81343 | -1.62688 | -1.72388 |
| O  | -0.61957 | -2.32524 | -0.09766 |
| H  | -0.75311 | -2.77434 | 0.74188  |
| H  | 2.07210  | -1.20615 | -1.06260 |
| H  | 0.38610  | -2.27580 | -0.28221 |
| O  | -2.31899 | 1.18166  | 0.12213  |
| H  | -3.12918 | 1.24589  | -0.38773 |
| Si | 0.88271  | 1.47199  | 0.01297  |
| O  | 1.86295  | 1.77110  | 1.28209  |
| H  | 1.45901  | 1.80696  | 2.15114  |
| O  | -0.09634 | 2.71943  | -0.36241 |
| H  | -1.03242 | 2.46580  | -0.26018 |
| O  | 1.96230  | 1.18897  | -1.18274 |
| H  | 1.66738  | 1.35075  | -2.08102 |
| N  | 1.97844  | -2.11806 | -0.62770 |
| H  | 2.31037  | -2.80025 | -1.29782 |
| C  | 2.78722  | -2.17080 | 0.59631  |
| H  | 2.41384  | -1.42992 | 1.29950  |
| H  | 2.68611  | -3.15199 | 1.05441  |
| H  | 3.84602  | -1.97849 | 0.41998  |



02\_cma-k.mol2

E = -1281.999401

H = -1281.794070

G = -1281.865813

G(quasi-RRHO) = -1281.860472

|    |          |          |          |
|----|----------|----------|----------|
| Si | -0.24470 | 0.98650  | 0.00188  |
| O  | -0.73333 | 1.79256  | 1.34617  |
| H  | -0.24926 | 2.60506  | 1.51083  |
| O  | -1.43677 | 0.69426  | -1.08754 |
| O  | 0.77709  | -0.25309 | 0.25492  |
| H  | -1.24098 | 1.03595  | -1.96357 |
| O  | -1.73409 | -0.57315 | 1.23489  |
| H  | -2.06531 | 0.01532  | 1.91837  |
| H  | -3.39756 | -0.72219 | -1.19793 |
| H  | -2.52219 | -0.85084 | 0.69088  |
| O  | 0.78773  | 2.05710  | -0.77594 |
| H  | 0.44557  | 2.91208  | -1.04329 |
| Si | 2.32585  | -0.66953 | -0.01939 |
| O  | 3.06771  | -1.10687 | 1.36524  |
| H  | 3.14206  | -0.44481 | 2.05474  |
| O  | 3.08661  | 0.56772  | -0.76074 |
| H  | 2.49803  | 1.32276  | -0.92471 |
| O  | 2.42597  | -2.04836 | -0.88440 |
| H  | 2.15343  | -2.01227 | -1.80290 |
| H  | -3.84738 | -2.21703 | -0.73395 |
| C  | -5.14507 | -0.75271 | -0.11750 |
| H  | -5.07613 | 0.28649  | 0.19757  |
| H  | -5.84326 | -0.81084 | -0.95461 |
| H  | -5.55642 | -1.32458 | 0.71142  |
| N  | -3.80482 | -1.25112 | -0.43620 |

TS3-sma, water cleavage from IM2,  $\text{CH}_3\text{NH}_3^+$  acting as spectator

00\_sma-k.mol2

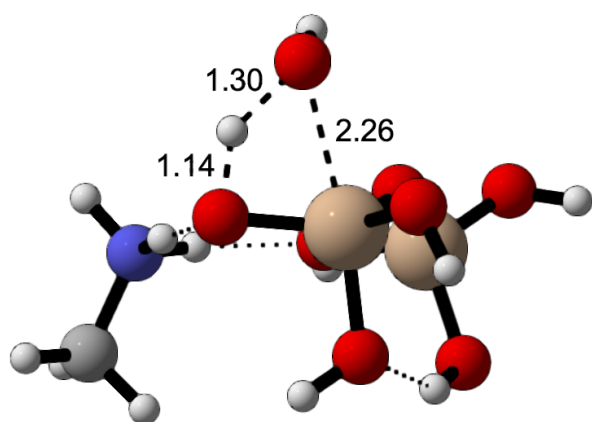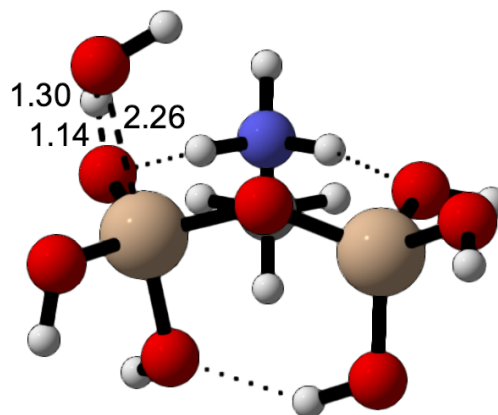

|    |          |          |          |
|----|----------|----------|----------|
| O  | 2.15469  | 0.07441  | -0.14739 |
| H  | 2.24457  | -0.44104 | -1.15782 |
| O  | 1.41133  | -2.61421 | 0.50667  |
| O  | 1.80242  | -1.45385 | -1.83817 |
| H  | 1.14036  | -1.15316 | -2.46439 |
| H  | 1.30580  | -2.84128 | 1.43381  |
| O  | 0.57919  | -0.55949 | 1.81096  |
| H  | 1.24161  | -0.02647 | 2.25415  |
| Si | -1.81797 | -0.04956 | -0.11475 |
| O  | -1.57710 | 1.48653  | -0.66652 |
| H  | -2.31738 | 2.09563  | -0.60617 |
| O  | -2.10172 | -0.10961 | 1.48887  |
| O  | -3.12707 | -0.60412 | -0.90960 |
| H  | -3.56209 | -1.38316 | -0.55708 |
| O  | -0.46707 | -0.85339 | -0.49392 |
| H  | -1.26371 | -0.21824 | 1.97289  |
| H  | 1.60372  | 1.60208  | -0.40935 |
| N  | 1.12060  | 2.53054  | -0.56962 |
| H  | 1.46980  | 2.93303  | -1.43491 |
| H  | 0.12236  | 2.31261  | -0.69631 |
| C  | 1.32747  | 3.45040  | 0.57329  |
| H  | 2.38930  | 3.63440  | 0.69139  |
| H  | 0.80773  | 4.38354  | 0.38752  |
| H  | 0.93452  | 2.98178  | 1.46870  |

TS4-cma, water cleavage from IM2, CH<sub>3</sub>NH<sub>3</sub><sup>+</sup> acting as catalyst  
*00\_cma-m.mol2*

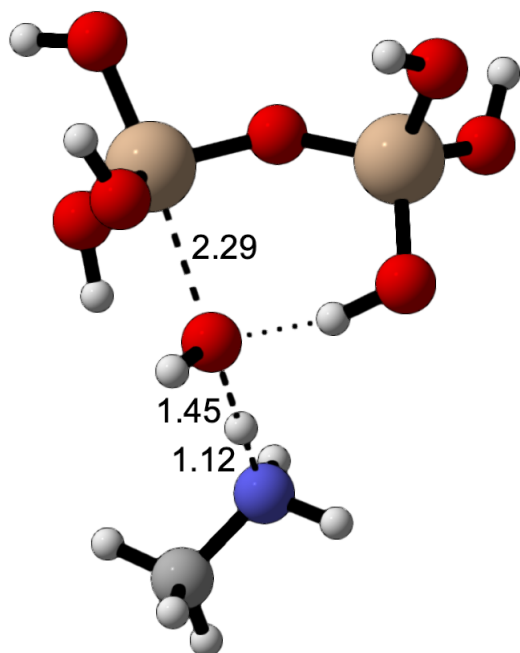

E = -1281.999471  
 H = -1281.793911  
 G = -1281.859799  
 G(quasi-RRHO) = -1281.856616

|    |          |          |          |
|----|----------|----------|----------|
| Si | -0.27925 | -1.54201 | -0.10202 |
| O  | 0.99679  | -2.02640 | -1.02836 |
| H  | 1.77784  | -1.51788 | -0.79451 |
| O  | -1.38299 | -2.70408 | -0.61394 |
| O  | 1.32786  | -0.07550 | 0.62656  |
| H  | 1.57029  | -0.44786 | 1.47857  |
| H  | -0.97715 | -3.51008 | -0.93600 |
| O  | -1.10709 | -0.20685 | -0.57154 |
| O  | -0.27404 | -1.82771 | 1.53252  |
| Si | -1.54119 | 1.26310  | -0.03217 |
| O  | -3.01039 | 1.20548  | 0.69565  |
| O  | -0.37750 | 1.83846  | 0.93375  |
| H  | 2.42553  | 0.71062  | 0.09119  |
| O  | -1.73179 | 2.30207  | -1.28141 |
| H  | -2.53136 | 2.21712  | -1.80389 |
| H  | -3.13350 | 0.55183  | 1.38670  |
| H  | -0.86662 | -2.55039 | 1.75397  |
| H  | 3.17238  | 1.37190  | -1.32563 |
| H  | 0.37861  | 1.17784  | 0.93674  |
| N  | 3.26618  | 1.32465  | -0.31497 |

|   |         |          |          |
|---|---------|----------|----------|
| C | 4.57515 | 0.74951  | 0.06950  |
| H | 4.64439 | -0.25560 | -0.33218 |
| H | 5.38283 | 1.35839  | -0.32168 |
| H | 4.63293 | 0.71221  | 1.15187  |
| H | 3.16896 | 2.27318  | 0.03552  |

TS4-sma, water cleavage from IM2, CH<sub>3</sub>NH<sub>3</sub><sup>+</sup> acting as spectator

*00\_sma-m.mol2*

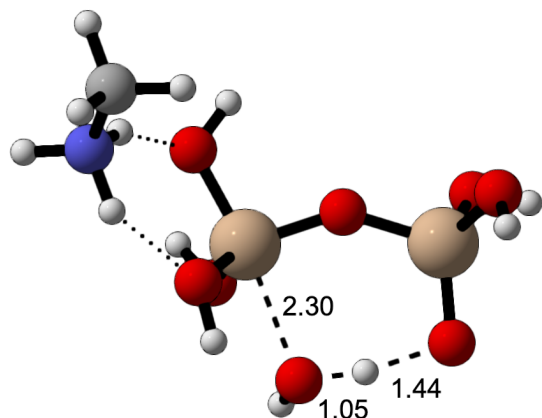

E = -1281.997612  
H = -1281.790368  
G = -1281.856047  
G(quasi-RRHO) = -1281.852956

|    |          |          |          |
|----|----------|----------|----------|
| Si | 0.52567  | -0.77042 | 0.27253  |
| O  | 0.25617  | -2.24953 | 0.95784  |
| H  | 0.74545  | -2.36539 | 1.77577  |
| O  | 1.65518  | -0.12197 | 1.36201  |
| O  | -0.77087 | -1.79265 | -1.32584 |
| H  | -0.94927 | -2.66359 | -0.96147 |
| H  | 1.27631  | 0.49264  | 1.99343  |
| O  | -0.65663 | 0.33117  | 0.39214  |
| O  | 1.53069  | -0.71292 | -1.04167 |
| Si | -2.21950 | 0.66571  | -0.03191 |
| O  | -2.26729 | 2.26387  | -0.47438 |
| O  | -2.74930 | -0.31931 | -1.14117 |
| H  | -1.66934 | -1.24812 | -1.31766 |
| O  | -2.98034 | 0.63426  | 1.43768  |
| H  | -3.91994 | 0.82338  | 1.42167  |
| H  | -2.20160 | 2.41347  | -1.41911 |
| H  | 1.12732  | -1.13901 | -1.80363 |
| H  | 3.23947  | 0.31387  | 0.66990  |

|   |         |          |          |
|---|---------|----------|----------|
| H | 3.38313 | 0.02240  | -0.90341 |
| H | 4.73099 | -0.13490 | 0.05185  |
| N | 3.90360 | 0.42990  | -0.11973 |
| C | 4.24979 | 1.85193  | -0.35616 |
| H | 4.89436 | 1.92204  | -1.22454 |
| H | 3.33324 | 2.40462  | -0.52792 |
| H | 4.75847 | 2.24008  | 0.51854  |

*01\_sma-m.mol2*

E = -1282.000666  
H = -1281.793014  
G = -1281.855212  
G(quasi-RRHO) = -1281.853413

|    |          |          |          |
|----|----------|----------|----------|
| Si | -0.25648 | -1.42580 | -0.19089 |
| O  | 0.42051  | -1.59115 | 1.30539  |
| H  | -0.22887 | -1.55750 | 2.01101  |
| O  | 1.21505  | -1.76820 | -0.98095 |
| O  | -2.06488 | -1.11055 | 1.04680  |
| H  | -2.81302 | -1.49928 | 0.58613  |
| H  | 1.22343  | -1.52616 | -1.90984 |
| O  | -0.50160 | 0.09172  | -0.75266 |
| O  | -1.24320 | -2.58866 | -0.82160 |
| Si | -0.93307 | 1.53731  | -0.08899 |
| O  | -1.40569 | 2.53750  | -1.31333 |
| O  | -2.04489 | 1.38062  | 1.00839  |
| H  | -2.18890 | -0.07397 | 1.08879  |
| O  | 0.55778  | 2.08906  | 0.44923  |
| H  | 0.54752  | 2.86385  | 1.01532  |
| H  | -0.72297 | 2.80278  | -1.93228 |
| H  | -0.78624 | -3.19020 | -1.41357 |
| H  | 2.72611  | -0.19133 | 1.42604  |
| H  | 1.93833  | 0.94096  | 0.51230  |
| C  | 3.96264  | 0.70834  | 0.00647  |
| H  | 4.68277  | -0.10181 | -0.00413 |
| H  | 3.83177  | 1.09928  | -0.99623 |
| H  | 4.30165  | 1.49708  | 0.66831  |
| H  | 2.28814  | -0.56234 | -0.11629 |
| N  | 2.65906  | 0.19494  | 0.48769  |

*02\_sma-m.mol2*

E = -1282.000020  
H = -1281.792927

G = -1281.854990  
G(quasi-RRHO) = -1281.853111

|    |          |          |          |
|----|----------|----------|----------|
| Si | -0.92902 | -1.12064 | 0.20532  |
| O  | -1.77451 | -0.50039 | -1.09581 |
| H  | -1.41936 | -0.82200 | -1.92932 |
| O  | -2.04729 | -0.55737 | 1.34109  |
| O  | 0.29934  | -1.89718 | -1.36420 |
| H  | 0.45786  | -2.82292 | -1.16071 |
| H  | -1.64525 | -0.26616 | 2.16042  |
| O  | 0.37515  | -0.25795 | 0.70742  |
| O  | -0.99579 | -2.74240 | 0.54804  |
| Si | 1.78529  | 0.33623  | 0.10597  |
| O  | 2.90615  | 0.37536  | 1.31364  |
| O  | 2.29082  | -0.48873 | -1.13489 |
| H  | 1.22939  | -1.36434 | -1.34830 |
| O  | 1.34619  | 1.92390  | -0.21069 |
| H  | 2.01206  | 2.47031  | -0.63452 |
| H  | 2.72943  | 0.97568  | 2.04030  |
| H  | -1.60419 | -2.91860 | 1.26955  |
| H  | -1.66834 | 1.31644  | -1.00326 |
| H  | -1.50385 | 2.82591  | -1.68180 |
| N  | -1.37464 | 2.29428  | -0.82479 |
| C  | -2.13922 | 2.89035  | 0.29834  |
| H  | -3.18940 | 2.92645  | 0.03223  |
| H  | -2.00251 | 2.26485  | 1.17252  |
| H  | -1.76867 | 3.89100  | 0.48852  |
| H  | -0.35767 | 2.26113  | -0.61703 |

*03\_sma-m.mol2*

E = -1281.998494  
H = -1281.792206  
G = -1281.854497  
G(quasi-RRHO) = -1281.852578

|    |          |          |          |
|----|----------|----------|----------|
| Si | -1.33773 | -0.75604 | -0.21157 |
| O  | -1.92056 | -2.29673 | -0.10269 |
| H  | -1.69956 | -2.69401 | 0.74241  |
| O  | -2.12066 | -0.45075 | -1.67914 |
| O  | -0.56060 | -1.23167 | 1.70158  |
| H  | -0.85987 | -0.57976 | 2.34039  |
| H  | -1.67158 | 0.19883  | -2.22138 |
| O  | 0.20446  | -0.43373 | -0.68260 |
| O  | -2.03071 | 0.49921  | 0.67977  |

|    |          |          |          |
|----|----------|----------|----------|
| Si | 1.74200  | -0.43223 | -0.10486 |
| O  | 2.07107  | 1.20661  | -0.09773 |
| O  | 1.82647  | -1.14882 | 1.30007  |
| H  | 0.53838  | -1.22005 | 1.64649  |
| O  | 2.76055  | -1.02927 | -1.25350 |
| H  | 2.98339  | -1.95742 | -1.16152 |
| H  | 2.95063  | 1.46208  | 0.18960  |
| H  | -2.77643 | 0.86831  | 0.19712  |
| H  | -0.89042 | 1.93136  | 0.78907  |
| H  | -0.06834 | 3.13091  | 1.59693  |
| H  | 0.71594  | 2.21620  | 0.44611  |
| N  | -0.18028 | 2.67973  | 0.69266  |
| C  | -0.57563 | 3.65724  | -0.35120 |
| H  | -1.51524 | 4.11868  | -0.07014 |
| H  | 0.19759  | 4.41135  | -0.44144 |
| H  | -0.68857 | 3.12894  | -1.29117 |

PC-ma, product complexes

*00\_cma-p1.mol2*

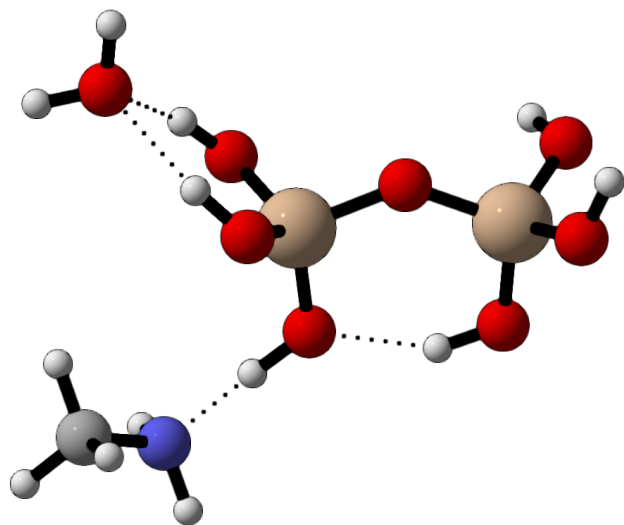

E = -1282.021765  
H = -1281.815523  
G = -1281.887725  
G(quasi-RRHO) = -1281.882729

|    |         |          |         |
|----|---------|----------|---------|
| Si | 0.45488 | 0.42677  | 0.05194 |
| O  | 1.08441 | 1.16702  | 1.36573 |
| H  | 1.64844 | 1.92874  | 1.16796 |
| O  | 0.59065 | -1.18534 | 0.14281 |

|    |          |          |          |
|----|----------|----------|----------|
| O  | 1.16844  | 1.02594  | -1.29031 |
| H  | 1.72078  | 1.80663  | -1.13937 |
| H  | 1.49789  | -1.64143 | 0.21727  |
| O  | 2.60074  | 3.12484  | -0.02250 |
| H  | 2.32177  | 4.04444  | -0.07526 |
| Si | -2.50473 | -0.21270 | -0.03960 |
| O  | -3.55008 | 0.30068  | 1.10625  |
| H  | -3.20890 | 0.43579  | 1.99259  |
| O  | -2.08959 | -1.77553 | 0.13893  |
| O  | -3.30647 | -0.08563 | -1.45413 |
| H  | -3.83274 | 0.70326  | -1.59705 |
| O  | -1.15681 | 0.70286  | -0.01160 |
| H  | -1.12414 | -1.89880 | 0.16817  |
| H  | 3.56263  | 3.13878  | 0.00636  |
| N  | 2.93478  | -2.41759 | 0.32299  |
| H  | 2.82208  | -3.35716 | -0.03787 |
| C  | 4.00364  | -1.72176 | -0.40604 |
| H  | 4.96472  | -2.23277 | -0.34621 |
| H  | 3.72334  | -1.63207 | -1.45269 |
| H  | 4.11949  | -0.71909 | -0.00145 |
| H  | 3.18696  | -2.51829 | 1.29863  |

*01\_cma-p3.mol2*

E = -1282.021423

H = -1281.815259

G = -1281.887290

G(quasi-RRHO) = -1281.882712

|    |          |          |          |
|----|----------|----------|----------|
| Si | 1.68960  | 0.89945  | -0.12484 |
| O  | 1.07231  | 2.36372  | -0.42448 |
| H  | 0.13828  | 2.55100  | -0.20992 |
| O  | 3.13544  | 0.81868  | -0.87508 |
| O  | -1.54740 | 2.95361  | 0.14880  |
| H  | -1.96434 | 3.42676  | -0.57893 |
| H  | 3.22475  | 1.27180  | -1.71569 |
| O  | 0.67480  | -0.27544 | -0.59327 |
| O  | 1.95400  | 0.58217  | 1.46616  |
| Si | 0.07306  | -1.69579 | -0.03127 |
| O  | 0.52890  | -1.84217 | 1.53568  |
| O  | -1.51610 | -1.77548 | -0.24706 |
| H  | -1.63289 | 3.53015  | 0.91534  |
| O  | 0.65661  | -2.95296 | -0.90267 |
| H  | 1.56781  | -3.20340 | -0.74039 |
| H  | 1.07793  | -1.11502 | 1.85981  |



|   |          |          |          |
|---|----------|----------|----------|
| H | 2.58315  | 1.12349  | 1.94713  |
| H | -3.48485 | 0.09049  | 1.39247  |
| H | -2.10435 | -1.00427 | 0.04493  |
| H | -2.62545 | 1.10657  | 0.45615  |
| N | -3.13693 | 0.22919  | 0.45188  |
| C | -4.25674 | 0.30766  | -0.49336 |
| H | -4.80339 | -0.63265 | -0.48861 |
| H | -4.95593 | 1.11406  | -0.26714 |
| H | -3.86753 | 0.46256  | -1.49722 |

*02\_cma-p2.mol2*

E = -1282.018667  
H = -1281.811706  
G = -1281.883845  
G(quasi-RRHO) = -1281.878851

|    |          |          |          |
|----|----------|----------|----------|
| Si | -0.26894 | 0.11009  | -0.41819 |
| O  | -0.98417 | 1.60902  | -0.27505 |
| H  | -0.44112 | 2.36563  | -0.50749 |
| O  | -1.28242 | -1.01324 | -0.02892 |
| O  | 1.10788  | 0.18987  | 0.48518  |
| H  | -2.63881 | -0.92579 | 0.46182  |
| O  | -3.60942 | 2.01428  | 0.48608  |
| H  | -2.66360 | 1.97468  | 0.24223  |
| H  | -3.77448 | -1.17976 | 1.74161  |
| H  | -3.66881 | 2.60597  | 1.24059  |
| O  | 0.35314  | -0.00709 | -1.96280 |
| H  | -0.22434 | -0.39987 | -2.62021 |
| Si | 2.68859  | -0.13721 | 0.30883  |
| O  | 3.62327  | 1.06083  | 0.90500  |
| H  | 3.64251  | 1.88529  | 0.41607  |
| O  | 2.99720  | -0.40145 | -1.27272 |
| H  | 2.19786  | -0.33698 | -1.82152 |
| O  | 3.15235  | -1.39211 | 1.24518  |
| H  | 2.69025  | -2.22362 | 1.12497  |
| N  | -3.69026 | -0.82530 | 0.79446  |
| C  | -4.61002 | -1.52884 | -0.12097 |
| H  | -4.48538 | -1.12130 | -1.11878 |
| H  | -4.36417 | -2.58552 | -0.13211 |
| H  | -5.63840 | -1.39666 | 0.19949  |
| H  | -3.87727 | 0.18685  | 0.81328  |

*03\_cma-p1.mol2*

E = -1282.020244

H = -1281.813240

G = -1281.882726

G(quasi-RRHO) = -1281.878960

|    |          |          |          |
|----|----------|----------|----------|
| Si | 0.09360  | 1.26532  | -0.32891 |
| O  | 1.03676  | 1.92579  | 0.84387  |
| H  | 1.69427  | 1.35248  | 1.26492  |
| O  | 0.76495  | 0.04609  | -1.09607 |
| O  | -0.38349 | 2.53573  | -1.26986 |
| H  | 0.31972  | 3.03199  | -1.69207 |
| H  | 2.12181  | -0.43573 | -0.91986 |
| O  | 3.11006  | 0.31882  | 1.96790  |
| H  | 2.85231  | -0.27367 | 2.68183  |
| Si | -2.13316 | -0.63430 | 0.21172  |
| O  | -2.50904 | -1.21026 | 1.69963  |
| H  | -1.81235 | -1.20728 | 2.35876  |
| O  | -1.22464 | -1.65498 | -0.66733 |
| O  | -3.57090 | -0.47769 | -0.55200 |
| H  | -4.29998 | -0.11918 | -0.04257 |
| O  | -1.33803 | 0.78029  | 0.35003  |
| H  | -0.38952 | -1.19606 | -0.94836 |
| H  | 3.78788  | -0.45309 | -1.39143 |
| H  | 3.83274  | 0.85108  | 2.31667  |
| H  | 3.39480  | -0.53100 | 0.20857  |
| N  | 3.13086  | -0.85050 | -0.72745 |
| C  | 3.12030  | -2.32605 | -0.80620 |
| H  | 2.81723  | -2.62526 | -1.80383 |
| H  | 4.10626  | -2.72288 | -0.58797 |
| H  | 2.40547  | -2.70627 | -0.08411 |

*04\_cma-p3.mol2*

E = -1282.016486

H = -1281.810319

G = -1281.879024

G(quasi-RRHO) = -1281.874731

|    |          |          |          |
|----|----------|----------|----------|
| Si | -0.72384 | 1.55571  | 0.09039  |
| O  | 0.59724  | 1.77802  | -0.73200 |
| H  | 1.28357  | 0.70733  | -1.17802 |
| O  | -0.84061 | 2.66006  | 1.30838  |
| O  | 1.82229  | -0.19191 | -1.48642 |
| H  | 1.89814  | -0.17628 | -2.44436 |

|    |          |          |          |
|----|----------|----------|----------|
| H  | -1.66563 | 2.66539  | 1.79730  |
| O  | -0.85532 | 0.05679  | 0.77467  |
| O  | -2.12608 | 1.61252  | -0.81913 |
| Si | -1.22493 | -1.39788 | 0.13815  |
| O  | -2.49126 | -1.19263 | -0.88296 |
| O  | 0.07268  | -2.06735 | -0.57039 |
| H  | 3.24593  | -0.34338 | -0.74872 |
| O  | -1.64619 | -2.47679 | 1.29103  |
| H  | -2.53744 | -2.40694 | 1.63785  |
| H  | -2.64386 | -0.25763 | -1.09026 |
| H  | -2.13177 | 2.24817  | -1.53754 |
| H  | 4.44933  | -1.40694 | -0.22962 |
| H  | 0.72930  | -1.44193 | -0.94960 |
| N  | 4.13075  | -0.44326 | -0.16461 |
| C  | 3.86943  | -0.05997 | 1.24564  |
| H  | 3.09426  | -0.70687 | 1.63993  |
| H  | 4.77811  | -0.16990 | 1.82607  |
| H  | 3.53477  | 0.97068  | 1.26592  |
| H  | 4.85421  | 0.14159  | -0.57530 |

*05\_sma-p1.mol2*

E = -1282.015869  
H = -1281.807756  
G = -1281.877396  
G(quasi-RRHO) = -1281.873172

|    |          |          |          |
|----|----------|----------|----------|
| Si | 0.16254  | -0.94169 | -0.14277 |
| O  | -0.79487 | -1.81710 | -1.19300 |
| H  | -0.34462 | -2.39452 | -1.81186 |
| O  | 0.81559  | 0.33363  | -1.01273 |
| O  | 1.26418  | -1.74398 | 0.60853  |
| H  | 2.72719  | -1.47093 | 0.92650  |
| H  | 0.16921  | 1.01406  | -1.23912 |
| O  | 3.71586  | -1.25250 | 1.05029  |
| H  | 3.85308  | -1.08839 | 1.98621  |
| Si | -2.37286 | 0.47349  | 0.26546  |
| O  | -3.31022 | -0.59623 | -0.53833 |
| H  | -2.77815 | -1.26072 | -0.99942 |
| O  | -1.83478 | 1.69360  | -0.69317 |
| O  | -3.24866 | 1.13557  | 1.46605  |
| H  | -3.79711 | 0.55102  | 1.99324  |
| O  | -1.01814 | -0.24474 | 0.79319  |
| H  | -2.47206 | 2.15699  | -1.24059 |
| H  | 3.73630  | 0.11235  | 0.05745  |

|   |         |         |          |
|---|---------|---------|----------|
| H | 2.51584 | 0.79358 | -0.84212 |
| H | 4.07470 | 0.81713 | -1.42971 |
| N | 3.51489 | 0.91206 | -0.58725 |
| C | 3.75317 | 2.21561 | 0.07327  |
| H | 3.14205 | 2.26604 | 0.96761  |
| H | 4.80092 | 2.29479 | 0.34067  |
| H | 3.48217 | 3.01938 | -0.60198 |

*06\_sma-p3.mol2*

E = -1282.016046  
H = -1281.807807  
G = -1281.874823  
G(quasi-RRHO) = -1281.871921

|    |          |          |          |
|----|----------|----------|----------|
| Si | -0.45294 | 1.47857  | -0.45145 |
| O  | -1.24998 | 1.01540  | 0.89790  |
| H  | -0.67876 | 0.93289  | 1.71353  |
| O  | -1.55182 | 1.82142  | -1.61091 |
| O  | 0.42425  | 0.57837  | 2.87006  |
| H  | 0.82797  | 1.35239  | 3.26987  |
| H  | -1.69311 | 1.15785  | -2.28831 |
| O  | 0.51507  | 0.30254  | -1.00643 |
| O  | 0.35375  | 2.84339  | -0.05961 |
| Si | 1.50382  | -0.81755 | -0.28768 |
| O  | 2.70998  | -1.13754 | -1.37113 |
| O  | 1.99517  | -0.43218 | 1.14704  |
| H  | 1.11185  | 0.17749  | 2.22718  |
| O  | 0.51296  | -2.17035 | -0.37450 |
| H  | 0.92143  | -2.98839 | -0.08047 |
| H  | 3.56927  | -0.79248 | -1.12272 |
| H  | 0.93882  | 3.21956  | -0.72020 |
| H  | -1.96824 | -0.68590 | 0.79238  |
| H  | -2.20747 | -2.16234 | 1.51340  |
| H  | -1.15949 | -2.01167 | 0.23164  |
| C  | -3.19396 | -1.99039 | -0.30945 |
| H  | -3.25083 | -3.06055 | -0.47119 |
| H  | -4.11804 | -1.62960 | 0.12715  |
| H  | -3.00625 | -1.48411 | -1.24937 |
| N  | -2.07294 | -1.70077 | 0.61745  |

*07\_sma-p3.mol2*

E = -1282.012878

H = -1281.805018  
G = -1281.873586  
G(quasi-RRHO) = -1281.869866

|    |          |          |          |
|----|----------|----------|----------|
| Si | -0.63044 | 1.32417  | -0.29366 |
| O  | -1.26656 | 0.65368  | 1.04916  |
| H  | -0.65348 | 0.48255  | 1.82636  |
| O  | -1.73481 | 0.86495  | -1.42650 |
| O  | 0.41302  | 0.06570  | 2.93273  |
| H  | 0.76246  | 0.81329  | 3.42349  |
| H  | -1.64297 | 1.22285  | -2.31176 |
| O  | 0.85995  | 0.81559  | -0.62414 |
| O  | -0.50149 | 2.95244  | -0.22554 |
| Si | 1.80203  | -0.50933 | -0.28434 |
| O  | 3.16288  | -0.31823 | -1.21153 |
| O  | 2.10453  | -0.70774 | 1.24233  |
| H  | 1.15456  | -0.24776 | 2.28330  |
| O  | 0.94393  | -1.72238 | -1.02660 |
| H  | 1.28219  | -2.60719 | -0.87621 |
| H  | 3.92873  | -0.00763 | -0.72593 |
| H  | -1.30516 | 3.44985  | -0.06169 |
| H  | -2.48397 | -0.63066 | 0.65577  |
| H  | -3.98714 | -1.29677 | 0.33005  |
| N  | -3.02506 | -1.23233 | 0.00816  |
| C  | -2.39701 | -2.57151 | -0.13533 |
| H  | -2.41642 | -3.06838 | 0.82777  |
| H  | -2.95582 | -3.14718 | -0.86387 |
| H  | -1.37276 | -2.43204 | -0.46568 |
| H  | -3.00649 | -0.71529 | -0.87401 |

*08\_sma-p2.mol2*

E = -1282.009030  
H = -1281.801713  
G = -1281.873496  
G(quasi-RRHO) = -1281.868008

|    |          |          |          |
|----|----------|----------|----------|
| Si | -0.08907 | 0.09978  | 0.02519  |
| O  | -0.77377 | 0.14386  | 1.53305  |
| H  | -1.61870 | -0.32145 | 1.55066  |
| O  | -1.00045 | -0.66754 | -0.99978 |
| O  | -3.02449 | -1.38922 | 0.25966  |
| H  | -3.02864 | -2.34206 | 0.38057  |
| H  | -2.19561 | -1.14504 | -0.33394 |
| O  | 0.27685  | 1.67509  | -0.40078 |

|    |          |          |          |
|----|----------|----------|----------|
| H  | -0.41269 | 2.15514  | -0.86268 |
| Si | 2.96631  | -0.09294 | -0.02500 |
| O  | 3.87222  | -0.26569 | 1.32372  |
| H  | 3.57620  | 0.19700  | 2.10959  |
| O  | 3.00057  | 1.43528  | -0.60017 |
| O  | 3.72578  | -1.12055 | -1.04285 |
| H  | 3.46115  | -1.09559 | -1.96403 |
| O  | 1.42590  | -0.51798 | 0.24869  |
| H  | 2.11050  | 1.82279  | -0.65900 |
| H  | -5.31957 | -0.12319 | -1.50018 |
| H  | -4.41955 | -0.77318 | -0.22877 |
| N  | -5.32303 | -0.27444 | -0.49445 |
| C  | -5.44653 | 1.00985  | 0.23934  |
| H  | -5.44334 | 0.80131  | 1.30284  |
| H  | -4.59840 | 1.63473  | -0.01625 |
| H  | -6.37009 | 1.50244  | -0.04167 |
| H  | -6.10327 | -0.89271 | -0.28692 |

*09\_sma-p1.mol2*

E = -1282.009445

H = -1281.801929

G = -1281.872506

G(quasi-RRHO) = -1281.867388

|    |          |          |          |
|----|----------|----------|----------|
| Si | 0.01110  | 0.84674  | -0.32227 |
| O  | -0.37824 | -0.03040 | 1.05490  |
| H  | -1.13569 | -0.61001 | 0.89343  |
| O  | 0.10167  | 2.44029  | 0.10867  |
| O  | -0.98529 | 0.50600  | -1.48870 |
| H  | -1.93131 | -0.49340 | -1.03813 |
| H  | -0.73658 | 2.90544  | 0.12574  |
| O  | -2.56467 | -1.17446 | -0.55270 |
| H  | -2.41334 | -2.04217 | -0.93607 |
| Si | 2.75540  | -0.39495 | 0.10496  |
| O  | 2.12860  | -1.09866 | 1.43864  |
| H  | 1.18243  | -0.89142 | 1.54749  |
| O  | 4.08062  | 0.48623  | 0.47416  |
| O  | 3.38740  | -1.48342 | -0.93695 |
| H  | 2.77509  | -2.08250 | -1.36754 |
| O  | 1.60021  | 0.49583  | -0.60451 |
| H  | 3.99958  | 1.10926  | 1.19840  |
| H  | -5.73653 | -1.16072 | -0.65640 |
| H  | -4.11266 | -0.74187 | -0.47129 |
| N  | -5.11775 | -0.42508 | -0.32414 |

|   |          |          |          |
|---|----------|----------|----------|
| C | -5.36834 | -0.11962 | 1.10655  |
| H | -5.17751 | -1.01434 | 1.68785  |
| H | -4.69307 | 0.67070  | 1.41318  |
| H | -6.39680 | 0.19717  | 1.23543  |
| H | -5.28263 | 0.39087  | -0.90828 |

Two  $\text{CH}_3\text{NH}_3^+$

RC-2ma, Reactant Complexes

*00\_2ma-c.mol2*

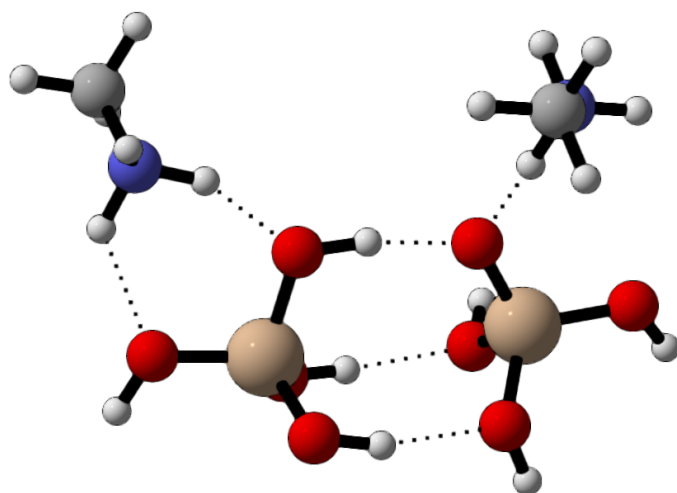

E = -1378.333501  
H = -1378.040494  
G = -1378.120406  
G(quasi-RRHO) = -1378.114850

|    |          |          |          |
|----|----------|----------|----------|
| Si | -1.54511 | -1.15693 | 0.35013  |
| O  | -0.82425 | -1.60322 | 1.74437  |
| H  | 0.14491  | -1.67322 | 1.69941  |
| O  | -1.20662 | 0.39345  | -0.03913 |
| O  | -1.17744 | -2.18528 | -0.86211 |
| H  | -0.25113 | -2.18172 | -1.15885 |
| H  | -0.22048 | 0.58785  | -0.12674 |
| O  | -3.16778 | -1.13474 | 0.56737  |
| H  | -3.61389 | -1.95062 | 0.80182  |
| Si | 2.15864  | -0.72044 | -0.29667 |
| O  | 1.57782  | -1.79393 | -1.43098 |
| H  | 1.73456  | -1.56717 | -2.35112 |
| O  | 1.92996  | -1.56870 | 1.11366  |
| O  | 3.74895  | -0.43015 | -0.58132 |

|   |          |          |          |
|---|----------|----------|----------|
| H | 4.32483  | -1.18188 | -0.73409 |
| O | 1.35830  | 0.63740  | -0.22103 |
| H | 2.34586  | -2.43267 | 1.17083  |
| H | -2.62489 | 1.46195  | -0.02106 |
| N | -3.64024 | 1.66664  | 0.05409  |
| H | -3.78565 | 2.34429  | 0.79831  |
| C | -4.21125 | 2.13623  | -1.23292 |
| H | -5.27607 | 2.29622  | -1.11201 |
| H | -3.72344 | 3.06173  | -1.51495 |
| H | -4.03146 | 1.37714  | -1.98533 |
| H | -4.04828 | 0.77524  | 0.34705  |
| H | 3.41780  | 2.91240  | -0.34524 |
| N | 2.41618  | 2.98532  | -0.18925 |
| H | 1.98727  | 1.97786  | -0.23063 |
| C | 2.12669  | 3.62270  | 1.11583  |
| H | 1.05131  | 3.68307  | 1.24043  |
| H | 2.55017  | 3.00809  | 1.90227  |
| H | 2.55931  | 4.61647  | 1.14914  |
| H | 2.03405  | 3.53223  | -0.95570 |

TS1-2ma, Si-O bond association

[00\\_2ma-d.mol2](#)

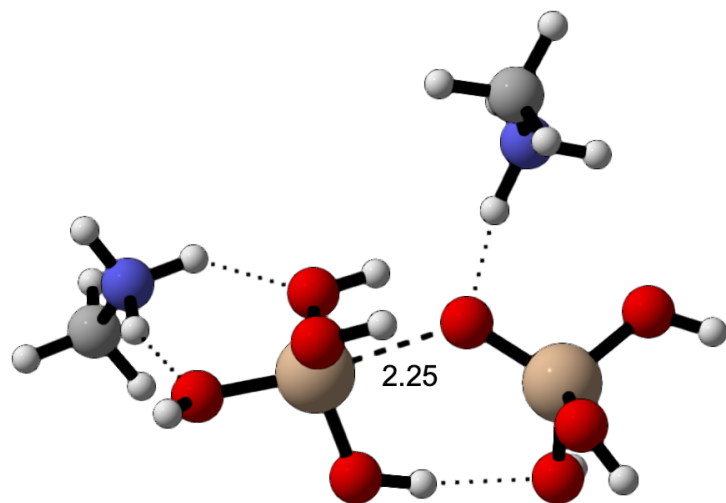

E = -1378.320940  
H = -1378.026854  
G = -1378.104440  
G(quasi-RRHO) = -1378.099602

|    |          |          |         |
|----|----------|----------|---------|
| Si | -1.09306 | -0.41409 | 0.64339 |
|----|----------|----------|---------|



|    |          |          |          |
|----|----------|----------|----------|
| O  | -0.46958 | 0.18010  | 2.05022  |
| H  | 0.46827  | 0.36634  | 1.95188  |
| O  | -1.50208 | 0.58990  | -0.61419 |
| O  | -0.77804 | -1.97366 | 0.24322  |
| H  | 0.02523  | -2.16765 | -0.25648 |
| H  | -0.74033 | 0.76707  | -1.17130 |
| O  | -2.68695 | -0.59533 | 1.19550  |
| H  | -2.76567 | -0.70434 | 2.14460  |
| Si | 2.22075  | -0.83013 | -0.34486 |
| O  | 1.78747  | -2.26789 | -1.04737 |
| H  | 1.68867  | -2.27232 | -2.00234 |
| O  | 2.93836  | -1.26526 | 1.06552  |
| O  | 3.25668  | 0.00645  | -1.31939 |
| H  | 4.14442  | -0.33881 | -1.43418 |
| O  | 0.97323  | 0.11859  | -0.08017 |
| H  | 3.48611  | -2.05250 | 1.05982  |
| H  | -3.42795 | 1.13771  | -0.95526 |
| N  | -4.28036 | 0.87398  | -0.45247 |
| H  | -4.70521 | 1.71423  | -0.06948 |
| C  | -5.22943 | 0.12460  | -1.30929 |
| H  | -6.08776 | -0.16338 | -0.71346 |
| H  | -5.54239 | 0.75560  | -2.13312 |
| H  | -4.72831 | -0.75889 | -1.68771 |
| H  | -3.90728 | 0.29271  | 0.32729  |
| H  | 2.76859  | 2.29143  | -1.09014 |
| N  | 1.92618  | 2.56925  | -0.58733 |
| H  | 1.43532  | 1.65344  | -0.35621 |
| C  | 2.24803  | 3.33980  | 0.63732  |
| H  | 1.32257  | 3.59336  | 1.14156  |
| H  | 2.86059  | 2.72093  | 1.28323  |
| H  | 2.78553  | 4.24213  | 0.36957  |
| H  | 1.34664  | 3.10982  | -1.22389 |

IM1-2ma, three equatorial OH groups

*00\_2ma-e.mol2*

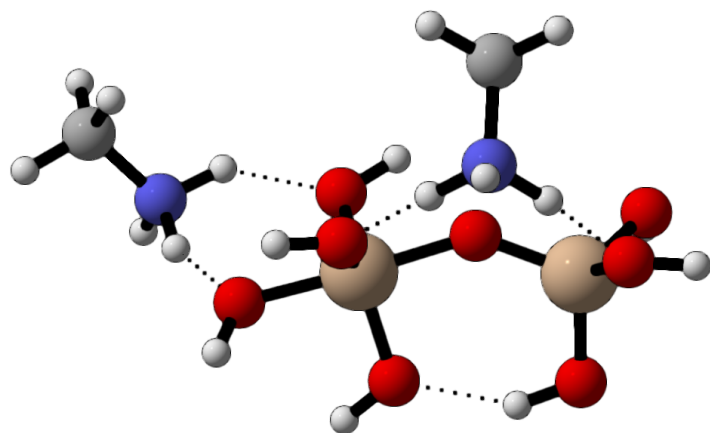

E = -1378.337527  
 H = -1378.041744  
 G = -1378.117489  
 G(quasi-RRHO) = -1378.113266

|    |          |          |          |
|----|----------|----------|----------|
| Si | 0.78917  | -0.24145 | -0.47943 |
| O  | 0.31363  | -1.61858 | -1.33646 |
| H  | 1.03502  | -2.04330 | -1.80320 |
| O  | 0.49829  | 1.28225  | -1.16200 |
| O  | 1.53876  | -0.36540 | 1.02260  |
| H  | 0.88606  | -0.35080 | 1.72502  |
| H  | 1.26885  | 1.65886  | -1.59087 |
| O  | 2.42670  | -0.29731 | -1.18573 |
| H  | 2.47433  | -0.26497 | -2.14242 |
| Si | -2.19799 | -0.89798 | 0.33474  |
| O  | -2.18279 | -2.26404 | -0.56036 |
| H  | -1.33411 | -2.31898 | -1.03787 |
| O  | -3.30070 | 0.20553  | -0.21769 |
| O  | -2.72615 | -1.26143 | 1.84431  |
| H  | -2.42287 | -2.09160 | 2.21690  |
| O  | -0.79147 | -0.14278 | 0.28105  |
| H  | -4.23048 | 0.03617  | -0.05303 |
| N  | -1.83605 | 2.59769  | -0.60162 |
| H  | -2.52788 | 1.83605  | -0.53362 |
| H  | -2.12601 | 3.23715  | -1.33608 |
| H  | -0.93230 | 2.15058  | -0.87715 |
| C  | -1.69362 | 3.29573  | 0.69748  |
| H  | -0.94658 | 4.07550  | 0.60117  |
| H  | -2.64638 | 3.72763  | 0.98204  |
| H  | -1.37713 | 2.57008  | 1.43804  |
| H  | 3.53254  | -0.49813 | 1.38873  |

|   |         |          |          |
|---|---------|----------|----------|
| N | 4.29390 | -0.47721 | 0.70475  |
| H | 3.76018 | -0.43891 | -0.19906 |
| C | 5.18012 | 0.69427  | 0.88578  |
| H | 5.93093 | 0.69277  | 0.10383  |
| H | 4.57938 | 1.59420  | 0.81687  |
| H | 5.65707 | 0.64166  | 1.85781  |
| H | 4.80875 | -1.35107 | 0.76150  |

*01\_2ma-e.mol2*

E = -1378.330900  
H = -1378.034774  
G = -1378.110176  
G(quasi-RRHO) = -1378.106006

|    |          |          |          |
|----|----------|----------|----------|
| Si | 0.70330  | -0.54616 | 0.09260  |
| O  | 1.09233  | -0.30178 | 1.70166  |
| H  | 1.98528  | -0.58138 | 1.90711  |
| O  | -0.05974 | -1.98816 | -0.37196 |
| O  | 1.06318  | 0.60806  | -1.08421 |
| H  | 1.86350  | 0.42392  | -1.57710 |
| H  | 0.52182  | -2.63180 | -0.77935 |
| O  | 2.33707  | -1.28758 | -0.24353 |
| H  | 2.46221  | -2.14459 | 0.17242  |
| Si | -1.72922 | 1.43580  | -0.01077 |
| O  | -0.89659 | 2.46405  | -0.97042 |
| H  | -0.06941 | 2.03450  | -1.25467 |
| O  | -2.32288 | 2.27925  | 1.26384  |
| O  | -3.08096 | 0.83252  | -0.75189 |
| H  | -3.84183 | 1.40887  | -0.84665 |
| O  | -0.86465 | 0.14974  | 0.36305  |
| H  | -1.74169 | 2.93438  | 1.65486  |
| H  | 5.04971  | -0.09549 | -1.35334 |
| N  | 4.83125  | -0.26726 | -0.37463 |
| H  | 5.46857  | -0.99063 | -0.04974 |
| C  | 4.97608  | 0.97230  | 0.43054  |
| H  | 4.74806  | 0.74197  | 1.46469  |
| H  | 5.99218  | 1.33948  | 0.34621  |
| H  | 4.27947  | 1.71235  | 0.05425  |
| H  | 3.84266  | -0.65273 | -0.32109 |
| H  | -3.05171 | -0.99886 | -0.76094 |
| N  | -2.79702 | -1.98512 | -0.59969 |
| H  | -1.75327 | -2.02756 | -0.58753 |
| C  | -3.34551 | -2.46323 | 0.69122  |
| H  | -3.05054 | -3.49536 | 0.84239  |

|   |          |          |          |
|---|----------|----------|----------|
| H | -2.93878 | -1.84331 | 1.48204  |
| H | -4.42662 | -2.38458 | 0.67575  |
| H | -3.14175 | -2.54073 | -1.37749 |

*02\_2ma-e.mol2*

E = -1378.327499  
H = -1378.031688  
G = -1378.107903  
G(quasi-RRHO) = -1378.103864

|    |          |          |          |
|----|----------|----------|----------|
| Si | -0.60078 | -0.72325 | 0.56326  |
| O  | 0.18685  | 0.23961  | 1.71097  |
| H  | 1.13002  | 0.05785  | 1.80705  |
| O  | -1.06907 | 0.05799  | -0.86975 |
| O  | -0.90744 | -2.32923 | 0.90747  |
| H  | -0.16741 | -2.88295 | 0.64993  |
| H  | -0.43302 | -0.10969 | -1.56849 |
| O  | -2.16432 | -0.24763 | 1.20384  |
| H  | -2.35087 | -0.63282 | 2.06111  |
| Si | 2.39733  | -0.56514 | -0.40159 |
| O  | 3.47113  | -1.50107 | -1.19955 |
| H  | 3.27288  | -1.74029 | -2.10723 |
| O  | 2.99869  | -0.33086 | 1.11107  |
| O  | 2.23806  | 0.89357  | -1.17560 |
| H  | 3.00867  | 1.23756  | -1.63392 |
| O  | 0.95129  | -1.20268 | -0.23283 |
| H  | 3.76328  | 0.23782  | 1.22202  |
| H  | -3.17229 | 0.41878  | -1.42463 |
| N  | -3.89664 | 0.30417  | -0.71594 |
| H  | -4.37352 | 1.19339  | -0.59778 |
| C  | -4.84481 | -0.77865 | -1.06276 |
| H  | -5.56387 | -0.88525 | -0.25844 |
| H  | -5.35588 | -0.53429 | -1.98705 |
| H  | -4.28679 | -1.70080 | -1.18043 |
| H  | -3.33821 | 0.08177  | 0.15834  |
| H  | 1.01181  | 2.20340  | -0.48552 |
| N  | 0.18024  | 2.53544  | 0.02379  |
| H  | 0.16068  | 1.99135  | 0.90077  |
| C  | 0.17877  | 4.00115  | 0.23507  |
| H  | -0.71585 | 4.27776  | 0.78075  |
| H  | 1.05962  | 4.27273  | 0.80534  |
| H  | 0.19411  | 4.49643  | -0.72893 |
| H  | -0.62559 | 2.20473  | -0.51017 |

03\_2ma-e.mol2

E = -1378.323194

H = -1378.027686

G = -1378.105513

G(quasi-RRHO) = -1378.100879

|    |          |          |          |
|----|----------|----------|----------|
| Si | -0.89177 | -0.38309 | 0.49142  |
| O  | -0.39778 | 0.17477  | 1.99345  |
| H  | 0.54404  | 0.34732  | 2.03195  |
| O  | -1.49595 | 0.61476  | -0.72306 |
| O  | -0.74928 | -2.00349 | 0.13438  |
| H  | 0.03220  | -2.27257 | -0.35817 |
| H  | -0.83798 | 0.80275  | -1.39339 |
| O  | -2.51993 | -0.57056 | 1.10749  |
| H  | -2.53502 | -0.61447 | 2.06449  |
| Si | 2.17806  | -0.84118 | -0.29465 |
| O  | 1.94827  | -2.29067 | -1.04035 |
| H  | 1.92917  | -2.29747 | -2.00028 |
| O  | 2.74782  | -1.19827 | 1.19494  |
| O  | 3.20232  | 0.12180  | -1.14865 |
| H  | 4.11940  | -0.14943 | -1.22833 |
| O  | 0.83097  | 0.01557  | -0.16164 |
| H  | 3.35781  | -1.93306 | 1.28459  |
| H  | -3.52175 | 1.18161  | -0.94765 |
| N  | -4.25361 | 0.82350  | -0.33230 |
| H  | -4.69785 | 1.60829  | 0.13536  |
| C  | -5.23928 | -0.00520 | -1.06128 |
| H  | -5.96280 | -0.39395 | -0.35368 |
| H  | -5.74059 | 0.59734  | -1.81028 |
| H  | -4.71481 | -0.82615 | -1.53716 |
| H  | -3.69663 | 0.25778  | 0.36983  |
| H  | 2.62980  | 2.25423  | -1.08756 |
| N  | 1.77584  | 2.58850  | -0.63836 |
| H  | 1.24625  | 1.71809  | -0.41557 |
| C  | 2.07040  | 3.37908  | 0.58325  |
| H  | 1.13354  | 3.69123  | 1.02942  |
| H  | 2.61955  | 2.75123  | 1.27555  |
| H  | 2.66380  | 4.24462  | 0.31356  |
| H  | 1.24998  | 3.13364  | -1.31707 |

TS2-2ma, water cleavage of IM1

00\_2ma-h.mol2

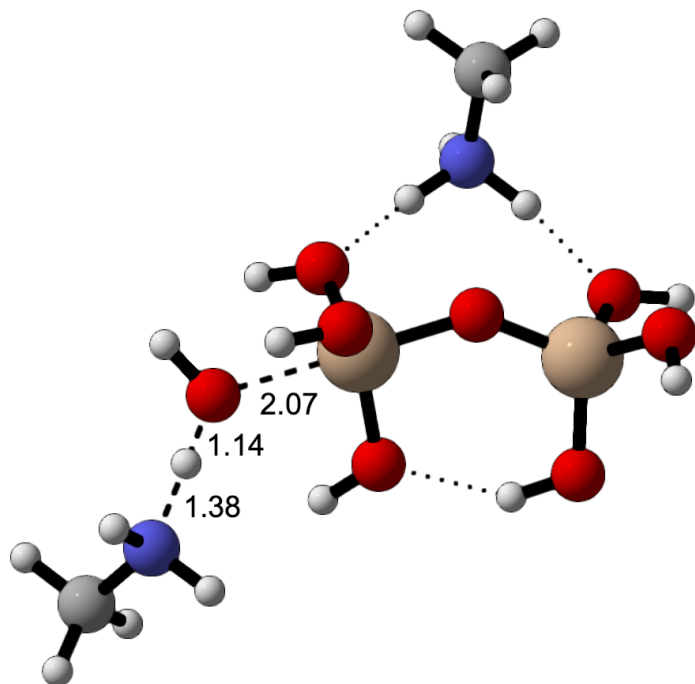

E = -1378.323218  
H = -1378.033062  
G = -1378.109887  
G(quasi-RRHO) = -1378.105027

|    |          |          |          |
|----|----------|----------|----------|
| Si | -0.63119 | 0.36177  | 0.28629  |
| O  | -0.99919 | 0.22255  | 1.88820  |
| H  | -1.88761 | 0.48688  | 2.12703  |
| O  | -0.16061 | 1.84333  | -0.32243 |
| O  | -1.09839 | -0.81670 | -0.79185 |
| H  | -1.90643 | -0.65384 | -1.27967 |
| H  | -0.84595 | 2.37393  | -0.73137 |
| O  | -2.55514 | 1.05897  | 0.00792  |
| H  | -2.75360 | 1.92526  | 0.37750  |
| Si | 1.91151  | -1.37433 | -0.02983 |
| O  | 1.08026  | -2.48287 | -0.89019 |
| H  | 0.19112  | -2.15852 | -1.10795 |
| O  | 2.73069  | -2.13316 | 1.16231  |
| O  | 3.07527  | -0.61190 | -0.91774 |
| H  | 3.86332  | -1.10376 | -1.15799 |
| O  | 0.95491  | -0.18795 | 0.47247  |
| H  | 2.28140  | -2.85023 | 1.61407  |
| H  | -5.03008 | -0.14336 | 1.21388  |
| N  | -4.58922 | -0.38222 | 0.33247  |
| H  | -4.31831 | -1.35672 | 0.40585  |

|   |          |          |          |
|---|----------|----------|----------|
| C | -5.53805 | -0.19624 | -0.78032 |
| H | -5.05070 | -0.47024 | -1.71155 |
| H | -6.43328 | -0.80099 | -0.65623 |
| H | -5.82121 | 0.85103  | -0.83263 |
| H | -3.46770 | 0.40015  | 0.17555  |
| H | 2.89008  | 1.20320  | -0.96747 |
| N | 2.56459  | 2.16999  | -0.81113 |
| H | 1.53345  | 2.11963  | -0.69672 |
| C | 3.19914  | 2.75045  | 0.39727  |
| H | 2.83205  | 3.76006  | 0.54105  |
| H | 2.93398  | 2.13505  | 1.24938  |
| H | 4.27501  | 2.76070  | 0.26632  |
| H | 2.77345  | 2.71981  | -1.64009 |

TS-iso-2ma, isomerization of IM1 to IM2

*00\_2ma-f.mol2*

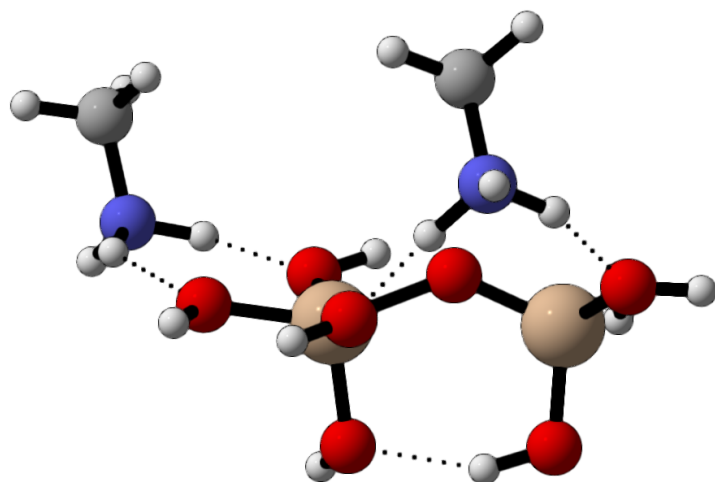

E = -1378.322576  
H = -1378.028296  
G = -1378.103460  
G(quasi-RRHO) = -1378.099227

|    |          |          |          |
|----|----------|----------|----------|
| Si | 0.71606  | -0.24716 | -0.70102 |
| O  | 0.34140  | -1.60117 | -1.63472 |
| H  | 0.92425  | -2.34526 | -1.46844 |
| O  | -0.09462 | 0.98174  | -1.62561 |
| O  | 1.60862  | -0.90627 | 0.63137  |
| H  | 1.02676  | -1.11650 | 1.36281  |
| H  | 0.34945  | 1.28743  | -2.41761 |
| O  | 2.26220  | 0.29113  | -1.24958 |

|    |          |          |          |
|----|----------|----------|----------|
| H  | 2.27495  | 0.78896  | -2.06629 |
| Si | -2.07004 | -0.85740 | 0.47337  |
| O  | -2.21145 | -1.99440 | -0.68974 |
| H  | -1.39809 | -2.05081 | -1.22545 |
| O  | -3.21428 | 0.32387  | 0.32744  |
| O  | -2.38380 | -1.52795 | 1.93551  |
| H  | -2.06793 | -2.42207 | 2.07946  |
| O  | -0.64714 | -0.12243 | 0.37945  |
| H  | -4.09849 | 0.13215  | 0.64662  |
| N  | -1.82066 | 2.66391  | -0.37390 |
| H  | -2.54325 | 1.99672  | -0.06983 |
| H  | -2.24762 | 3.35050  | -0.98911 |
| H  | -1.13261 | 2.09094  | -0.92140 |
| C  | -1.16382 | 3.30789  | 0.78717  |
| H  | -0.39413 | 3.98263  | 0.42981  |
| H  | -1.90097 | 3.85761  | 1.36139  |
| H  | -0.72016 | 2.52968  | 1.39754  |
| H  | 3.29694  | -0.75295 | 0.82030  |
| N  | 4.23637  | -0.40293 | 0.52522  |
| H  | 4.00135  | 0.00791  | -0.38539 |
| C  | 4.79068  | 0.59592  | 1.46605  |
| H  | 5.72273  | 0.98447  | 1.07160  |
| H  | 4.07211  | 1.40024  | 1.57629  |
| H  | 4.96265  | 0.12181  | 2.42559  |
| H  | 4.86917  | -1.18544 | 0.38766  |

01\_2ma-f.mol2

E = -1378.320796

H = -1378.026182

G = -1378.100423

G(quasi-RRHO) = -1378.096542

|    |          |          |          |
|----|----------|----------|----------|
| Si | -0.71788 | 0.33638  | 0.02660  |
| O  | 0.19518  | 1.27904  | 1.19355  |
| H  | 0.68651  | 0.70877  | 1.78876  |
| O  | 0.13014  | 0.80637  | -1.35996 |
| O  | -1.91832 | -0.72552 | -0.63448 |
| H  | -1.58969 | -1.62241 | -0.70764 |
| H  | -0.42437 | 0.85203  | -2.14191 |
| O  | -2.00641 | 1.44128  | 0.26284  |
| H  | -1.71924 | 2.16764  | 0.81906  |
| Si | 1.59039  | -1.64194 | 0.09794  |
| O  | 1.70369  | -1.67646 | -1.53662 |
| H  | 1.27801  | -0.90672 | -1.93705 |



|   |          |          |          |
|---|----------|----------|----------|
| O | 1.90783  | -3.14019 | 0.65882  |
| O | 2.74764  | -0.66261 | 0.75468  |
| H | 3.63837  | -1.01969 | 0.79588  |
| O | 0.16417  | -1.06511 | 0.55978  |
| H | 1.48033  | -3.87993 | 0.22293  |
| H | -3.60392 | -0.35138 | -0.63489 |
| N | -4.39202 | 0.28907  | -0.39704 |
| H | -4.90185 | 0.53744  | -1.23956 |
| C | -5.28280 | -0.27419 | 0.64167  |
| H | -6.03776 | 0.45769  | 0.90506  |
| H | -5.75393 | -1.17142 | 0.25671  |
| H | -4.68443 | -0.51745 | 1.51255  |
| H | -3.86630 | 1.10696  | -0.06187 |
| H | 2.93548  | 1.28152  | -0.00541 |
| N | 2.39517  | 2.12912  | -0.20000 |
| H | 1.54230  | 2.03608  | 0.39599  |
| C | 3.16547  | 3.36853  | 0.04482  |
| H | 2.53022  | 4.22244  | -0.16057 |
| H | 3.48042  | 3.38466  | 1.08203  |
| H | 4.03255  | 3.38699  | -0.60532 |
| H | 2.05286  | 2.05681  | -1.15694 |

IM2-2ma, co-linear OH groups on Si

[00\\_2ma-g.mol2](#)

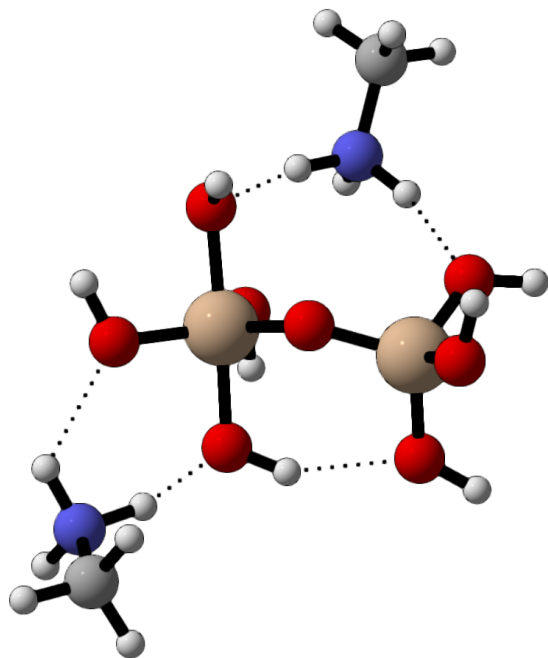

E = -1378.329262

H = -1378.034354  
G = -1378.111357  
G(quasi-RRHO) = -1378.106855

|    |          |          |          |
|----|----------|----------|----------|
| Si | -0.41609 | -0.97786 | -0.00710 |
| O  | 0.78049  | -1.86186 | -0.99669 |
| H  | 0.85584  | -1.48000 | -1.87413 |
| O  | 0.37854  | -1.60760 | 1.33299  |
| O  | -1.63075 | -0.17812 | 1.01454  |
| H  | -1.37519 | 0.70732  | 1.29335  |
| H  | -0.08322 | -1.36712 | 2.13833  |
| O  | -1.68995 | -1.76063 | -0.78122 |
| H  | -1.35895 | -2.43252 | -1.38034 |
| Si | 0.76774  | 1.86028  | -0.09955 |
| O  | -0.14493 | 2.33132  | 1.17562  |
| H  | 0.03936  | 3.16345  | 1.61528  |
| O  | 0.72856  | 3.07497  | -1.18603 |
| O  | 2.32435  | 1.52337  | 0.32956  |
| H  | 2.89326  | 2.25289  | 0.58661  |
| O  | 0.13803  | 0.49424  | -0.63791 |
| H  | 1.35167  | 3.04981  | -1.91508 |
| H  | -3.17430 | -0.41737 | 0.65027  |
| N  | -4.08740 | -0.74331 | 0.21484  |
| H  | -4.66540 | -1.18900 | 0.92127  |
| C  | -4.80725 | 0.35787  | -0.46238 |
| H  | -5.69704 | -0.02967 | -0.94570 |
| H  | -5.08156 | 1.10427  | 0.27450  |
| H  | -4.14727 | 0.79805  | -1.20151 |
| H  | -3.76903 | -1.45436 | -0.44465 |
| H  | 2.97965  | -0.26840 | 0.42007  |
| N  | 3.06210  | -1.28964 | 0.33757  |
| H  | 2.23026  | -1.59882 | -0.23622 |
| C  | 4.35267  | -1.69556 | -0.25902 |
| H  | 4.38187  | -2.77649 | -0.33904 |
| H  | 4.43365  | -1.25376 | -1.24620 |
| H  | 5.16890  | -1.34999 | 0.36553  |
| H  | 2.92424  | -1.68089 | 1.26529  |

*01\_2ma-g.mol2*

E = -1378.329418  
H = -1378.034471  
G = -1378.110830  
G(quasi-RRHO) = -1378.106621

|    |          |          |          |
|----|----------|----------|----------|
| Si | -0.41801 | -0.97575 | -0.00377 |
| O  | 0.77991  | -1.85702 | -0.99492 |
| H  | 0.85338  | -1.47393 | -1.87202 |
| O  | 0.38488  | -1.59769 | 1.33523  |
| O  | -1.63298 | -0.17956 | 1.01862  |
| H  | -1.37179 | 0.70264  | 1.30310  |
| H  | -0.07593 | -1.35966 | 2.14182  |
| O  | -1.69024 | -1.76520 | -0.77380 |
| H  | -1.35763 | -2.43536 | -1.37400 |
| Si | 0.77485  | 1.85585  | -0.10187 |
| O  | -0.14550 | 2.31534  | 1.17778  |
| H  | 0.09558  | 3.09609  | 1.68032  |
| O  | 0.86570  | 3.02901  | -1.23052 |
| O  | 2.32967  | 1.53325  | 0.32788  |
| H  | 2.92100  | 2.27318  | 0.48446  |
| O  | 0.12904  | 0.49715  | -0.64023 |
| H  | 0.06253  | 3.50718  | -1.44676 |
| H  | -3.17728 | -0.41655 | 0.65307  |
| N  | -4.08867 | -0.74474 | 0.21615  |
| H  | -4.66814 | -1.18898 | 0.92228  |
| C  | -4.80794 | 0.35334  | -0.46666 |
| H  | -5.69619 | -0.03679 | -0.95074 |
| H  | -5.08475 | 1.10209  | 0.26690  |
| H  | -4.14664 | 0.79146  | -1.20586 |
| H  | -3.76734 | -1.45747 | -0.44019 |
| H  | 2.99318  | -0.26196 | 0.40671  |
| N  | 3.06769  | -1.28393 | 0.32942  |
| H  | 2.23113  | -1.59106 | -0.23874 |
| C  | 4.35227  | -1.70245 | -0.27165 |
| H  | 4.37337  | -2.78404 | -0.34496 |
| H  | 4.43076  | -1.26733 | -1.26199 |
| H  | 5.17422  | -1.35866 | 0.34632  |
| H  | 2.93181  | -1.66911 | 1.25999  |

*02\_2ma-g.mol2*

E = -1378.329420

H = -1378.034446

G = -1378.110735

G(quasi-RRHO) = -1378.106536

|    |          |          |          |
|----|----------|----------|----------|
| Si | 0.56539  | -0.74127 | 0.18687  |
| O  | -0.53380 | -1.86323 | 1.03971  |
| H  | -0.78892 | -1.51487 | 1.89705  |
| O  | 0.07479  | -1.50084 | -1.22932 |

|    |          |          |          |
|----|----------|----------|----------|
| O  | 1.70252  | 0.30146  | -0.69368 |
| H  | 1.30247  | 1.11608  | -1.01574 |
| H  | 0.56817  | -1.16241 | -1.97872 |
| O  | 1.87224  | -1.25895 | 1.11376  |
| H  | 1.61663  | -1.99089 | 1.67850  |
| Si | -1.19500 | 1.77558  | 0.09658  |
| O  | -0.23389 | 2.44694  | -1.05268 |
| H  | -0.56901 | 3.16741  | -1.59014 |
| O  | -1.68870 | 2.87935  | 1.19013  |
| O  | -2.57113 | 1.13282  | -0.53585 |
| H  | -3.28361 | 1.72986  | -0.77574 |
| O  | -0.34787 | 0.57891  | 0.73188  |
| H  | -1.04296 | 3.51023  | 1.51484  |
| H  | 3.21022  | 0.37725  | -0.15129 |
| N  | 4.13429  | 0.17375  | 0.33253  |
| H  | 3.85991  | -0.50900 | 1.04005  |
| C  | 5.14478  | -0.36958 | -0.60173 |
| H  | 6.04917  | -0.61950 | -0.05851 |
| H  | 4.73769  | -1.25876 | -1.07014 |
| H  | 5.36148  | 0.37624  | -1.35812 |
| H  | 4.46914  | 1.01011  | 0.80160  |
| H  | -2.82923 | -0.75823 | -0.66209 |
| N  | -2.71706 | -1.77392 | -0.55278 |
| H  | -1.90413 | -1.90271 | 0.11079  |
| C  | -3.95764 | -2.41717 | -0.06904 |
| H  | -3.78218 | -3.48037 | 0.05100  |
| H  | -4.22642 | -1.98072 | 0.88659  |
| H  | -4.75597 | -2.25409 | -0.78454 |
| H  | -2.41457 | -2.14602 | -1.44899 |

TS3-2ma, water cleavage from IM2

[00\\_2ma-k.mol2](#)

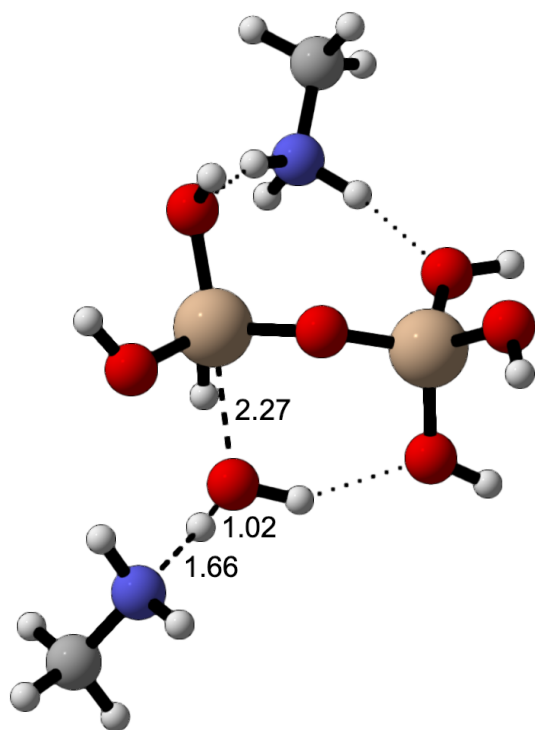

E = -1378.320869  
H = -1378.028749  
G = -1378.107125  
G(quasi-RRHO) = -1378.102103

|    |          |          |          |
|----|----------|----------|----------|
| Si | 0.26853  | -0.97415 | 0.38615  |
| O  | -0.92476 | -1.87785 | 1.17713  |
| H  | -1.12329 | -1.59807 | 2.07364  |
| O  | -0.15322 | -1.52366 | -1.10410 |
| O  | 1.82631  | 0.07492  | -0.88398 |
| H  | 1.55702  | 0.98655  | -1.06457 |
| H  | 0.45393  | -1.23040 | -1.78843 |
| O  | 1.64008  | -1.46740 | 1.14140  |
| H  | 1.48448  | -2.17735 | 1.76911  |
| Si | -0.89502 | 1.84550  | 0.12354  |
| O  | 0.17323  | 2.37405  | -0.99947 |
| H  | -0.02378 | 3.15790  | -1.51663 |
| O  | -1.25819 | 2.99280  | 1.21473  |
| O  | -2.32176 | 1.35656  | -0.52436 |
| H  | -2.95320 | 2.03009  | -0.79017 |
| O  | -0.20051 | 0.55253  | 0.78133  |
| H  | -0.55057 | 3.55119  | 1.54377  |
| H  | 2.75850  | 0.09298  | -0.48264 |
| N  | 4.26343  | -0.01142 | 0.20943  |

|   |          |          |          |
|---|----------|----------|----------|
| H | 4.04677  | -0.64547 | 0.96897  |
| C | 5.31256  | -0.56970 | -0.64985 |
| H | 6.24453  | -0.76898 | -0.11922 |
| H | 4.95980  | -1.50127 | -1.08664 |
| H | 5.51988  | 0.12328  | -1.46192 |
| H | 4.57506  | 0.85451  | 0.63062  |
| H | -2.93446 | -0.43745 | -0.69045 |
| N | -3.03463 | -1.46055 | -0.63533 |
| H | -2.38653 | -1.76620 | 0.11448  |
| C | -4.43539 | -1.87370 | -0.38444 |
| H | -4.47755 | -2.95494 | -0.32251 |
| H | -4.76360 | -1.43661 | 0.55171  |
| H | -5.06165 | -1.52333 | -1.19666 |
| H | -2.66850 | -1.84686 | -1.50246 |

TS4-2ma, water cleavage from IM2

[00\\_2ma-m.mol2](#)

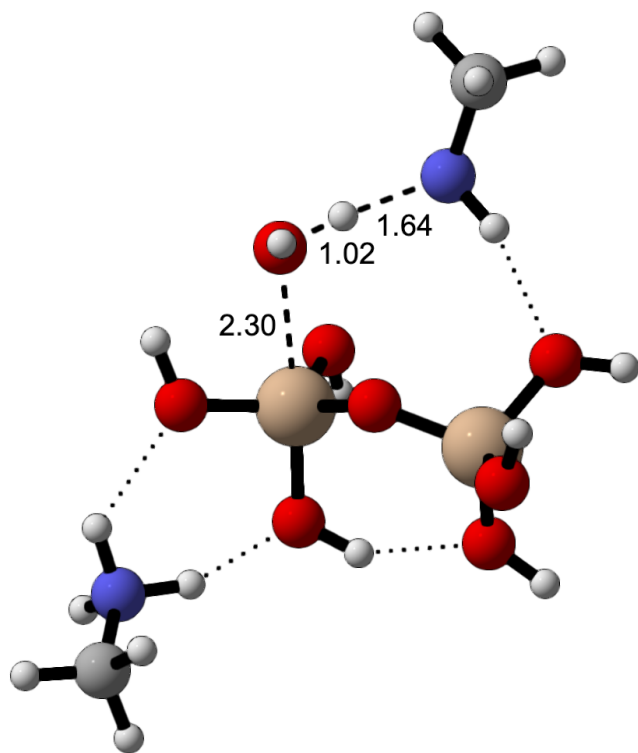

E = -1378.318070  
H = -1378.026135  
G = -1378.105308  
G(quasi-RRHO) = -1378.100061

|    |          |          |          |
|----|----------|----------|----------|
| Si | -0.56246 | -0.79128 | 0.22687  |
| O  | 0.97203  | -2.03524 | -0.95177 |
| H  | 1.06825  | -1.63989 | -1.82407 |
| O  | 0.25520  | -1.54425 | 1.43675  |
| O  | -1.76705 | 0.03669  | 1.06792  |
| H  | -1.52557 | 0.93953  | 1.31227  |
| H  | -0.13123 | -1.37483 | 2.29929  |
| O  | -1.58274 | -1.68430 | -0.70618 |
| H  | -1.15126 | -2.40931 | -1.16424 |
| Si | 0.81051  | 1.88650  | -0.10311 |
| O  | -0.16607 | 2.40037  | 1.10660  |
| H  | -0.06260 | 3.28401  | 1.46518  |
| O  | 0.69905  | 2.97473  | -1.30758 |
| O  | 2.36183  | 1.64651  | 0.35213  |
| H  | 2.91774  | 2.41183  | 0.51449  |
| O  | 0.23982  | 0.43450  | -0.51544 |
| H  | 1.36024  | 2.95539  | -2.00248 |
| H  | -3.42044 | -0.36072 | 0.62014  |
| N  | -4.17285 | -0.84282 | 0.08801  |
| H  | -4.73858 | -1.38809 | 0.73328  |
| C  | -4.99994 | 0.10505  | -0.69766 |
| H  | -5.73383 | -0.45102 | -1.26900 |
| H  | -5.49535 | 0.78570  | -0.01523 |
| H  | -4.34912 | 0.65775  | -1.36530 |
| H  | -3.65257 | -1.48767 | -0.51159 |
| H  | 3.13618  | -0.42022 | 0.41771  |
| N  | 3.24487  | -1.42118 | 0.28629  |
| H  | 1.86391  | -1.85627 | -0.48277 |
| C  | 4.51688  | -1.72181 | -0.37738 |
| H  | 4.61202  | -2.79714 | -0.51006 |
| H  | 4.52544  | -1.26147 | -1.36293 |
| H  | 5.38677  | -1.36482 | 0.17591  |
| H  | 3.21502  | -1.83945 | 1.20744  |

PC-2ma, product complexes

*00\_2ma-p1.mol2*

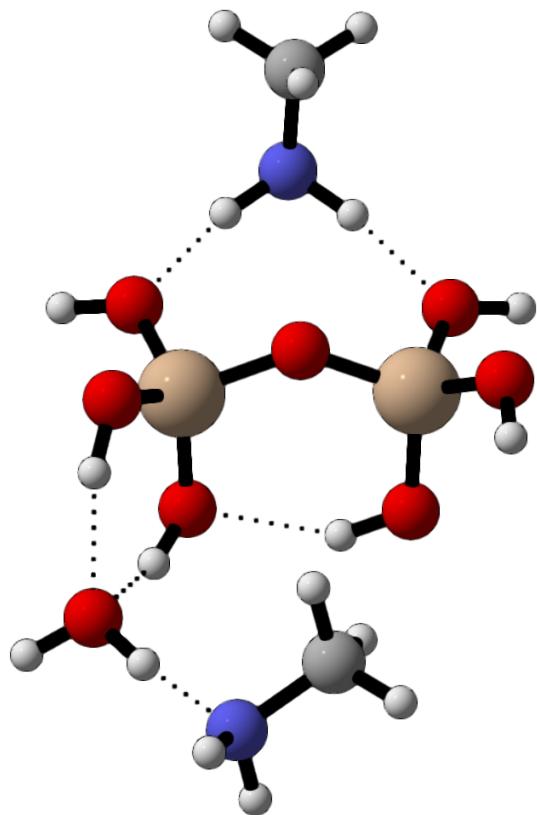

E = -1378.338120  
 H = -1378.045186  
 G = -1378.124952  
 G(quasi-RRHO) = -1378.119754

|    |          |          |          |
|----|----------|----------|----------|
| Si | 0.04465  | -1.30728 | -0.01540 |
| O  | -0.87931 | -1.98704 | -1.15884 |
| H  | -1.82124 | -2.03516 | -0.90627 |
| O  | 1.39864  | -2.19596 | 0.25145  |
| O  | -0.82826 | -1.07821 | 1.34870  |
| H  | -1.77031 | -1.32675 | 1.23223  |
| H  | 1.30258  | -3.13005 | 0.45263  |
| O  | -3.21433 | -1.80042 | 0.28902  |
| H  | -3.74309 | -2.55360 | 0.56515  |
| Si | 0.72984  | 1.62212  | 0.14719  |
| O  | -0.31425 | 1.74216  | 1.38746  |
| H  | -0.65215 | 0.89075  | 1.70407  |
| O  | 0.43681  | 2.78955  | -0.94184 |
| O  | 2.30482  | 1.78179  | 0.58190  |
| H  | 2.62812  | 2.64353  | 0.85499  |
| O  | 0.67226  | 0.12216  | -0.48136 |
| H  | -0.47764 | 3.02960  | -1.10667 |



|   |          |          |          |
|---|----------|----------|----------|
| H | -5.19747 | 0.65455  | 0.63036  |
| N | -4.72895 | 0.34196  | -0.21110 |
| H | -5.45819 | 0.14511  | -0.88537 |
| C | -3.84093 | 1.39708  | -0.71810 |
| H | -3.36323 | 1.05321  | -1.63253 |
| H | -4.36222 | 2.33098  | -0.92960 |
| H | -3.06162 | 1.59315  | 0.01491  |
| H | -3.84818 | -1.02652 | 0.11095  |
| H | 3.38328  | 0.29574  | 0.44509  |
| N | 3.79553  | -0.63564 | 0.27764  |
| H | 3.01848  | -1.31490 | 0.29734  |
| C | 4.51412  | -0.67776 | -1.02133 |
| H | 4.91461  | -1.67357 | -1.17076 |
| H | 3.81149  | -0.43701 | -1.81058 |
| H | 5.31728  | 0.04958  | -1.00364 |
| H | 4.42018  | -0.84890 | 1.05150  |

*01\_2ma-p2.mol2*

E = -1378.334442

H = -1378.041737

G = -1378.123134

G(quasi-RRHO) = -1378.117648

|    |          |          |          |
|----|----------|----------|----------|
| Si | 0.28204  | -0.59465 | 1.20256  |
| O  | -0.86824 | -1.32979 | 2.09512  |
| H  | -1.05216 | -0.99597 | 2.97567  |
| O  | 0.27246  | -1.48808 | -0.15599 |
| O  | 1.60853  | -0.24406 | -2.02238 |
| H  | 1.06640  | 0.55777  | -2.05603 |
| H  | 0.79193  | -1.10349 | -0.92200 |
| O  | 1.72932  | -0.48479 | 1.94397  |
| H  | 2.09645  | -1.28485 | 2.32711  |
| Si | -1.10959 | 1.76434  | -0.08661 |
| O  | -0.35187 | 1.84176  | -1.53257 |
| H  | -0.78658 | 2.32272  | -2.24152 |
| O  | -1.50886 | 3.20650  | 0.53760  |
| O  | -2.52256 | 0.95057  | -0.27899 |
| H  | -3.27382 | 1.26425  | 0.23230  |
| O  | -0.08583 | 0.96010  | 0.87704  |
| H  | -0.81508 | 3.79903  | 0.83457  |
| H  | 2.44519  | 0.00494  | -1.52786 |
| N  | 3.79979  | 0.29010  | -0.48860 |
| H  | 3.40135  | 0.23176  | 0.44236  |
| C  | 4.86835  | -0.70246 | -0.64720 |

|   |          |          |          |
|---|----------|----------|----------|
| H | 5.67881  | -0.58552 | 0.07398  |
| H | 4.45058  | -1.70051 | -0.53411 |
| H | 5.28607  | -0.62726 | -1.64857 |
| H | 4.17254  | 1.22568  | -0.58877 |
| H | -2.72647 | -0.97235 | -0.48567 |
| N | -2.50443 | -1.97493 | -0.42941 |
| H | -2.73879 | -2.28063 | 0.51316  |
| C | -3.21100 | -2.76955 | -1.46379 |
| H | -2.92994 | -3.81078 | -1.35923 |
| H | -4.27990 | -2.65572 | -1.32695 |
| H | -2.91981 | -2.40218 | -2.44096 |
| H | -1.47623 | -2.03445 | -0.50919 |

*02\_2ma-p2.mol2*

E = -1378.334940

H = -1378.042160

G = -1378.122703

G(quasi-RRHO) = -1378.117502

|    |          |          |          |
|----|----------|----------|----------|
| Si | -0.38852 | -0.31816 | 1.45908  |
| O  | 0.39867  | -0.15699 | 2.87325  |
| H  | 0.53660  | -0.94004 | 3.41003  |
| O  | -0.39749 | 1.19351  | 0.85344  |
| O  | -1.42966 | 1.17595  | -1.53777 |
| H  | -0.78093 | 0.58163  | -1.94237 |
| H  | -0.83669 | 1.27349  | -0.04689 |
| O  | -1.87494 | -0.97578 | 1.61628  |
| H  | -2.43738 | -0.63105 | 2.31380  |
| Si | 1.50236  | -1.29861 | -0.71130 |
| O  | 0.76418  | -0.66863 | -2.02692 |
| H  | 1.26646  | -0.62771 | -2.84483 |
| O  | 2.15390  | -2.76549 | -0.94381 |
| O  | 2.74537  | -0.29840 | -0.32660 |
| H  | 3.48290  | -0.68294 | 0.15536  |
| O  | 0.36564  | -1.34503 | 0.43967  |
| H  | 1.57670  | -3.53047 | -0.99413 |
| H  | -2.27423 | 0.64087  | -1.43762 |
| N  | -3.66599 | -0.27940 | -1.02729 |
| H  | -3.34812 | -0.78403 | -0.20692 |
| C  | -4.83893 | 0.53897  | -0.70209 |
| H  | -5.68180 | -0.04229 | -0.32488 |
| H  | -4.56541 | 1.27436  | 0.05150  |
| H  | -5.16248 | 1.07649  | -1.59053 |
| H  | -3.90327 | -0.97236 | -1.72557 |

|   |         |         |          |
|---|---------|---------|----------|
| H | 2.56855 | 1.57629 | 0.10500  |
| N | 2.10262 | 2.43487 | 0.42710  |
| H | 2.59754 | 2.77596 | 1.24773  |
| C | 2.04790 | 3.46579 | -0.64044 |
| H | 1.53714 | 4.34080 | -0.25613 |
| H | 3.05828 | 3.72172 | -0.93691 |
| H | 1.50364 | 3.05787 | -1.48429 |
| H | 1.15306 | 2.13618 | 0.71486  |

*03\_2ma-p3.mol2*

E = -1378.331915  
H = -1378.039524  
G = -1378.122587  
G(quasi-RRHO) = -1378.116228

|    |          |          |          |
|----|----------|----------|----------|
| Si | 0.10315  | 0.32007  | -0.57921 |
| O  | 3.03177  | 1.12014  | 1.47736  |
| H  | 3.01626  | 1.03295  | 2.43420  |
| O  | 1.26110  | -0.34932 | -1.51784 |
| O  | -1.07790 | 1.07268  | -1.43148 |
| H  | -1.87087 | 0.53519  | -1.57183 |
| H  | 1.74297  | 0.23278  | -2.11018 |
| O  | 0.69446  | 1.48599  | 0.37983  |
| H  | 1.58029  | 1.35630  | 0.82510  |
| Si | -1.91002 | -1.76644 | 0.27800  |
| O  | -2.80676 | -1.11255 | -0.92748 |
| H  | -3.73538 | -1.34218 | -1.00280 |
| O  | -2.75359 | -1.56841 | 1.65505  |
| O  | -1.48497 | -3.31878 | 0.03988  |
| H  | -2.14378 | -4.00109 | 0.18432  |
| O  | -0.52050 | -0.93197 | 0.24942  |
| H  | -2.48331 | -2.06328 | 2.43142  |
| H  | -1.29781 | 3.07643  | -0.96947 |
| N  | -0.86918 | 3.70098  | -0.27964 |
| H  | -0.42254 | 4.46958  | -0.77372 |
| C  | -1.85768 | 4.19032  | 0.71381  |
| H  | -1.34556 | 4.80976  | 1.44043  |
| H  | -2.61905 | 4.76602  | 0.20110  |
| H  | -2.30461 | 3.33345  | 1.20427  |
| H  | -0.13768 | 3.11521  | 0.15654  |
| H  | 3.74025  | -1.98693 | 0.90532  |
| N  | 3.79907  | -1.17751 | 0.30039  |
| H  | 3.36760  | 0.24151  | 1.10795  |
| C  | 5.11089  | -1.12600 | -0.35435 |

|   |         |          |          |
|---|---------|----------|----------|
| H | 5.15303 | -0.25525 | -1.00484 |
| H | 5.88727 | -1.01766 | 0.39949  |
| H | 5.33034 | -2.01254 | -0.95099 |
| H | 3.06117 | -1.27338 | -0.38917 |

04\_2ma-p3.mol2

E = -1378.331916  
H = -1378.039524  
G = -1378.122577  
G(quasi-RRHO) = -1378.116222

|    |          |          |          |
|----|----------|----------|----------|
| Si | 0.10308  | 0.32016  | -0.57934 |
| O  | 3.03169  | 1.12100  | 1.47690  |
| H  | 3.01608  | 1.03404  | 2.43377  |
| O  | 1.26110  | -0.34900 | -1.51804 |
| O  | -1.07816 | 1.07247  | -1.43161 |
| H  | -1.87110 | 0.53488  | -1.57177 |
| H  | 1.74282  | 0.23321  | -2.11041 |
| O  | 0.69419  | 1.48623  | 0.37965  |
| H  | 1.58011  | 1.35679  | 0.82483  |
| Si | -1.90958 | -1.76674 | 0.27805  |
| O  | -2.80654 | -1.11302 | -0.92735 |
| H  | -3.73525 | -1.34241 | -1.00226 |
| O  | -2.75313 | -1.56894 | 1.65515  |
| O  | -1.48416 | -3.31898 | 0.03987  |
| H  | -2.14287 | -4.00143 | 0.18416  |
| O  | -0.52024 | -0.93196 | 0.24943  |
| H  | -2.48276 | -2.06383 | 2.43148  |
| H  | -1.29867 | 3.07617  | -0.96932 |
| N  | -0.86999 | 3.70079  | -0.27960 |
| H  | -0.42363 | 4.46948  | -0.77378 |
| C  | -1.85834 | 4.18992  | 0.71410  |
| H  | -1.34617 | 4.80945  | 1.44062  |
| H  | -2.61995 | 4.76549  | 0.20160  |
| H  | -2.30498 | 3.33295  | 1.20466  |
| H  | -0.13827 | 3.11513  | 0.15639  |
| H  | 3.73993  | -1.98625 | 0.90562  |
| N  | 3.79894  | -1.17701 | 0.30045  |
| H  | 3.36746  | 0.24227  | 1.10772  |
| C  | 5.11094  | -1.12573 | -0.35395 |
| H  | 5.15326  | -0.25517 | -1.00469 |
| H  | 5.88712  | -1.01717 | 0.40007  |
| H  | 5.33055  | -2.01246 | -0.95027 |
| H  | 3.06120  | -1.27304 | -0.38925 |

## References

- 1 H. Hu, H. Hou, Z. He and B. Wang, *Phys Chem Chem Phys*, 2013, **15**, 15027–15032.
- 2 Y. Guan, V. M. Ingman, B. J. Rooks and S. E. Wheeler, *J. Chem. Theory Comput.*, 2018, **14**, 5249–5261.
- 3 V. M. Ingman, A. J. Schaefer, L. R. Andreola and S. E. Wheeler, *Wiley Interdiscip. Rev. Comput. Mol. Sci.*, 2021, **11**, 1–12.
